# Supplementary material for: The integrated stress response remodels the microtubule-organizing center to clear unfolded proteins following proteotoxic stress
Source: eLife. 2022 Jun 27;11:e77780. doi: 10.7554/eLife.77780 (PMC9299849; doi:10.7554/eLife.77780)
Supplement: Figure 3—source data 2. [file elife-77780-fig3-data2.xlsx]

## Sheet: DESeq_res_WTbort_v_WTveh_mRNAin
	ENTREZID	SYMBOL	baseMean	RPF_S51_veh_1	RPF_S51_veh_2	RPF_S51_veh_3	RPF_S51_bort_1	RPF_S51_bort_2	RPF_S51_bort_3	RPF_S51_bort_4	RPF_S51A_veh_1	RPF_S51A_veh_2	RPF_S51A_veh_3	RPF_S51A_veh_4	RPF_S51A_bort_1	RPF_S51A_bort_2	RPF_S51A_bort_3	RPF_S51A_bort_3	Tot_S51_veh_1	Tot_S51_veh_2	Tot_S51_veh_3	Tot_S51_veh_4	Tot_S51_bort_1	Tot_S51_bort_2	Tot_S51_bort_3	Tot_S51_bort_4	Tot_S51A_veh_1	Tot_S51A_veh_2	Tot_S51A_veh_3	Tot_S51A_veh_4	Tot_S51A_bort_1	Tot_S51A_bort_2	Tot_S51A_bort_3	Tot_S51A_bort_3
3035	215257	Il1f9	60.6252	0	0	0	11.4866	0	2.94624	4.3408	53.9757	38.6627	22.3835	43.5475	177.636	188.51	139.49	151.922	8.30028	11.1162	9.12563	6.26567	16.2535	11.5629	18.5062	11.5509	54.1708	57.8206	52.7864	33.9273	189.619	184.724	191.386	187.365
2638	12978	Csf1r	8.42684	0	0	0	5.74328	0	8.83873	0	0	8.05472	0	4.66581	17.7636	19.2357	45.129	24.3076	1.38338	1.27042	3.46145	1.70882	2.07491	3.30368	3.63515	1.40011	12.2119	9.11304	13.0252	8.92823	16.8321	13.911	20.0069	15.2275
6462	193740	Hspa1a	680.024	2.7539	3.90346	5.76528	827.033	718.407	877.981	816.07	3.59838	3.22189	28.7788	12.4422	1101.34	1342.65	1251.3	1385.53	9.68366	6.9873	6.29354	10.2529	1095.55	933.95	1204.56	1067.93	17.8482	18.5403	16.7957	17.8565	2009.89	2135.17	2185.28	1963.36
4329	57911	Gsdma	5.40915	0	0	0	0	0	5.89249	4.3408	14.3935	9.66566	15.9882	10.8869	5.07531	11.5414	16.4106	0	1.38338	0.952814	1.57338	1.70882	3.11237	2.31258	2.31328	1.75014	7.2019	8.17031	6.85538	5.35694	7.21375	10.0288	7.92724	5.62757
2360	233057	Zfp940	13.6228	0	0	3.84352	5.74328	22.4502	8.83873	8.68159	10.7951	3.22189	0	3.11054	15.2259	3.84714	16.4106	9.11534	15.563	16.1978	18.2513	15.949	17.9826	18.831	23.7937	18.2014	14.7169	19.7973	22.28	18.4517	24.0458	18.4401	20.3843	28.1379
4750	18645	Pfn2	6.2112	2.7539	0	0	0	7.48341	8.83873	4.3408	0	8.05472	9.59292	0	0	3.84714	8.20528	21.2691	3.8043	4.76407	5.34951	3.98724	7.60801	7.92883	8.92264	8.05063	5.63627	4.3994	2.39938	5.95215	11.3359	15.205	10.5697	12.2482
2907	212167	Gsap	7.1607	0	3.90346	1.92176	5.74328	0	11.785	13.0224	7.19677	4.83283	9.59292	10.8869	27.9142	3.84714	20.5132	9.11534	0.69169	0.317605	2.20274	1.99362	1.72909	1.32147	1.32187	1.40011	14.4038	9.42728	13.368	8.92823	10.6489	8.41127	7.92724	7.61377
796	328232	Gfod1	30.915	19.2773	27.3242	13.4523	0	0	0	0	14.3935	4.83283	41.5693	12.4422	17.7636	19.2357	0	9.11534	60.5229	62.8857	61.0473	50.1254	37.3484	25.108	33.3773	32.5525	75.4634	61.5915	63.0695	59.5215	45.0001	35.5862	42.6561	33.1034
6232	15511	Hspa1b	3633.6	234.082	284.952	199.863	6122.34	8658.3	6416.92	8026.13	266.28	270.639	297.381	281.504	4692.12	7340.35	5234.97	8456	237.25	231.534	244.819	264.867	6041.8	6878.92	6266.67	7376.83	291.207	323.984	311.577	341.058	5830.43	7560.44	6068.12	7590.27
1308	193838	Eme2	14.277	13.7695	46.8415	24.9829	0	0	2.94624	4.3408	7.19677	17.7204	47.9646	24.8843	17.7636	3.84714	16.4106	9.11534	13.488	18.1035	14.4751	9.39851	5.5331	9.2503	8.92264	8.75068	12.8382	15.3979	16.7957	19.3445	11.6794	14.558	11.7021	14.5655
3695	63986	Gmfg	9.17206	2.7539	0	0	17.2298	0	0	4.3408	14.3935	3.22189	15.9882	4.66581	12.6883	3.84714	0	15.1922	11.067	9.52814	9.44031	5.12646	13.1411	5.61626	9.91405	8.75068	16.5957	13.1982	17.824	10.7139	10.9924	14.2345	16.987	16.8827
986	16367	Irs1	17.1287	22.0312	23.4207	21.1394	5.74328	0	2.94624	4.3408	7.19677	11.2766	9.59292	9.33161	10.1506	19.2357	8.20528	33.4229	26.2842	26.6788	22.3421	21.3602	28.3571	22.7954	20.8195	26.9521	14.0907	16.0264	19.8806	16.9636	14.4275	18.1166	20.3843	27.4758
5443	20592	Kdm5d	83.5474	0	0	0	0	0	0	0	147.534	124.043	73.5458	147.751	119.27	57.7071	73.8475	66.8458	0	0	0	0	0.345819	0.660736	0.660937	0	240.481	232.54	220.4	244.931	207.825	212.87	212.148	206.565
2778	23993	Klk7	9.70148	0	0	0	0	0	2.94624	4.3408	25.1887	12.8876	6.39528	10.8869	15.2259	23.0829	20.5132	15.1922	2.07507	2.54084	5.03483	5.12646	2.07491	2.64294	2.97421	1.75014	17.5351	20.4258	13.368	13.0947	19.5802	17.4696	24.1592	14.2344
3778	27056	Irf5	12.2113	8.2617	0	0	0	0	2.94624	0	21.5903	25.7751	9.59292	17.108	22.8389	19.2357	28.7185	21.2691	2.07507	2.22323	1.25871	3.13284	4.14982	7.2681	4.62656	3.8503	26.6157	20.74	16.7957	18.7493	27.4809	23.6163	23.4042	15.2275
3083	19112	Prl8a6	9.65072	0	0	0	0	0	5.89249	0	17.9919	27.386	19.1858	27.9948	12.6883	34.6243	20.5132	24.3076	1.03754	1.90563	1.25871	1.70882	1.03746	1.98221	0.330468	0.700055	11.5857	12.5697	10.6258	10.7139	12.0229	12.6169	10.9471	17.5448
4617	99326	Garnl3	12.2208	2.7539	0	1.92176	5.74328	22.4502	2.94624	8.68159	14.3935	12.8876	9.59292	9.33161	20.3012	19.2357	12.3079	24.3076	6.9169	6.03449	5.34951	4.84165	6.57055	12.554	7.93124	10.8508	15.0301	21.0543	15.0818	17.5589	18.2061	21.3517	21.1393	21.5172
2666	140795	P2ry14	8.22651	2.7539	0	3.84352	11.4866	7.48341	5.89249	21.704	0	9.66566	9.59292	6.22108	7.61296	11.5414	4.10264	3.03845	8.99197	6.35209	8.49628	7.12008	6.57055	8.91994	12.2273	8.40066	12.525	9.11304	16.1101	6.84498	9.96184	10.3523	7.17227	10.9241
1532	213417	Klhdc8a	28.3724	30.2929	39.0346	9.60881	5.74328	0	0	0	10.7951	20.9423	6.39528	13.9974	7.61296	15.3886	12.3079	6.07689	78.5069	64.7913	72.6904	64.6503	24.8989	28.742	27.0984	33.9527	51.3527	57.1922	40.4467	41.3675	24.0458	31.057	32.0865	28.4689
19	18458	Pabpc1	5699.1	5232.41	5152.56	5701.87	1188.86	875.559	883.873	1024.43	4652.71	4625.02	3910.72	4869.55	1601.26	1535.01	1120.02	1415.92	9272.11	9133.99	8725.68	8616.44	13300.5	10270.5	8920.99	9590.75	6923.53	6900.14	6279.53	7408.64	7302.37	6444.65	6765.34	7027.18
2197	70564	Prxl2a	33.5949	0	0	5.76528	0	7.48341	8.83873	21.704	53.9757	33.8298	51.1623	32.6606	38.0648	26.93	45.129	39.4998	9.33782	11.4338	11.643	11.1073	9.68292	8.91994	11.2359	10.8508	85.7965	76.6752	78.8369	73.2115	63.2062	72.7899	69.8352	71.8343
4694	236285	Lancl3	7.62708	2.7539	3.90346	0	0	7.48341	0	0	7.19677	19.3313	0	10.8869	2.53765	19.2357	20.5132	18.2307	0	1.27042	2.83209	0.569606	3.11237	2.64294	4.29609	4.20033	10.6463	8.17031	8.22646	11.0115	17.5191	13.2639	20.3843	16.2206
2886	665211	Gm14326	53.9113	0	0	3.84352	11.4866	7.48341	8.83873	0	7.19677	6.44378	3.19764	3.11054	17.7636	3.84714	8.20528	12.1538	78.5069	106.715	110.137	121.326	87.1463	85.5653	88.235	113.759	78.2815	93.6443	83.2929	107.139	108.55	105.788	105.319	104.276
2653	378702	Serf2	305.955	5.5078	3.90346	0	0	0	14.7312	17.3632	3.59838	3.22189	12.7906	7.77634	10.1506	3.84714	8.20528	15.1922	490.754	462.432	489.637	449.419	525.99	512.731	515.861	537.642	612.788	609.316	593.333	562.478	733.741	766.073	736.856	779.253
4394	16658	Mafb	25.3409	5.5078	3.90346	1.92176	0	22.4502	14.7312	13.0224	57.5741	57.994	83.1387	27.9948	45.6778	69.2486	57.4369	121.538	3.45845	2.54084	2.83209	0.85441	4.14982	3.30368	3.96562	2.80022	22.8582	26.7106	26.3932	18.4517	19.9237	19.4106	22.2718	23.5034
1427	66300	Inafm1	15.7671	13.7695	23.4207	13.4523	0	0	5.89249	0	7.19677	6.44378	22.3835	6.22108	5.07531	3.84714	8.20528	18.2307	31.8178	27.6316	24.5448	28.1955	24.8989	22.465	27.4289	28.7022	20.9794	19.1688	19.5378	20.8325	18.5496	13.5874	17.3644	8.93791
6291	171463	Il17rd	5.76001	2.7539	0	0	11.4866	0	2.94624	0	10.7951	8.05472	9.59292	10.8869	5.07531	0	24.6158	3.03845	1.72923	0.952814	2.20274	1.99362	4.49564	2.64294	1.98281	0.700055	14.0907	6.28485	7.54092	8.92823	9.27482	4.20564	14.3445	7.94481
6387	73710	Tubb2b	10.6508	2.7539	0	0	5.74328	7.48341	0	4.3408	14.3935	16.1094	9.59292	10.8869	20.3012	11.5414	28.7185	18.2307	3.8043	4.44646	2.83209	1.13921	4.49564	3.96442	5.61796	4.20033	14.4038	11.9412	20.2234	16.9636	20.6107	27.1749	20.3843	17.8758
9212	18094	Nkx2-9	56.3957	22.0312	39.0346	3.84352	189.528	217.019	138.473	204.017	10.7951	12.8876	3.19764	10.8869	104.044	100.026	118.976	176.23	6.22521	5.39928	3.77612	5.98087	53.6019	56.4929	41.3085	51.804	3.13126	4.3994	5.4843	4.76172	42.5955	33.3216	33.9739	45.0206
4851	319530	Zfp750	89.2504	22.0312	35.1311	17.2959	246.961	231.986	235.7	160.609	61.1725	80.5472	47.9646	48.2133	210.625	238.523	184.619	142.807	13.1421	17.1506	10.699	8.8289	102.362	87.8779	75.6772	80.5063	22.8582	27.9676	22.6228	19.3445	84.1604	81.5246	74.3651	73.4895
3474	433904	Ociad2	26.1162	0	3.90346	3.84352	5.74328	0	8.83873	17.3632	35.9838	41.8845	38.3717	40.437	63.4414	84.6371	73.8475	45.5767	6.22521	4.76407	5.03483	3.98724	3.804	4.95552	5.61796	8.40066	30.9995	31.7385	30.8492	37.4986	37.7863	40.1153	47.941	46.0137
1140	77041	Arsk	15.0357	8.2617	0	3.84352	5.74328	29.9336	17.6775	8.68159	25.1887	12.8876	9.59292	13.9974	10.1506	15.3886	12.3079	6.07689	18.6756	23.1851	22.3421	21.0754	15.9077	14.8666	15.8625	14.7011	15.0301	17.5976	16.1101	20.5349	17.1756	22.3222	15.0995	15.8896
1	13629	Eef2	31347.8	44918.9	53293.9	43998.7	16351.1	15049.1	13429	16017.5	40812.9	41108.1	42787.6	40054.4	30913.7	28992.1	29567.7	30177.9	24323.3	24118.3	23148.3	22640.4	43842.9	47408.1	42786.4	45451.7	19976.2	20445.6	19994.7	19912.9	30035.3	34720.8	32004.9	33500.3
4170	11936	Fxyd2	12.6841	5.5078	3.90346	3.84352	11.4866	7.48341	23.57	8.68159	17.9919	19.3313	9.59292	17.108	17.7636	23.0829	12.3079	24.3076	4.84183	6.35209	5.34951	4.27205	5.87892	8.58957	8.26171	9.45074	15.9694	21.3685	20.2234	13.3923	18.8932	14.8815	16.6095	12.9103
16	230721	Pabpc4	1466.24	641.659	749.464	545.78	189.528	261.919	144.366	125.883	478.585	443.01	489.239	496.131	228.389	161.58	229.748	179.268	2377.69	2446.19	2294.62	2276.43	3401.82	3341.34	3209.51	3318.26	1802.04	1877.6	1799.88	1783.27	2587.33	2519.82	2587.68	2465.54
3042	80797	Clca3a2	7.68729	0	0	3.84352	0	14.9668	2.94624	8.68159	7.19677	19.3313	9.59292	7.77634	5.07531	11.5414	12.3079	15.1922	1.72923	3.17605	1.88806	4.55685	1.72909	1.32147	1.65234	3.50027	14.7169	15.7121	14.0535	12.2019	6.87024	12.9404	13.2121	10.5931
8040	12227	Btg2	305.536	38.5546	74.1657	74.9487	643.248	613.639	447.829	516.555	79.1644	82.1581	76.7434	59.1002	375.573	453.963	389.751	504.382	54.9894	74.9547	71.4317	84.8714	587.2	603.582	524.123	578.595	74.524	89.2449	61.6984	85.711	515.611	537.674	445.813	651.805
2	13627	Eef1a1	74473.4	77684.8	69981.2	81986.2	26401.9	25129.3	23964.8	27251.5	78754.2	77460.6	74668.1	76149.1	57655.5	49174.2	49358.8	48077.3	78429.4	80550.2	75956.7	76957	118171	127885	117078	123950	64969.3	67721.2	67197.1	67887.6	92849.5	101975	98778.7	104620
2103	226610	Fam78b	39.3864	30.2929	42.938	9.60881	5.74328	0	0	4.3408	39.5822	17.7204	9.59292	18.6632	5.07531	0	4.10264	9.11534	86.8071	101.316	83.3894	85.7258	48.0688	39.9745	26.107	40.9532	83.9178	86.731	77.4658	94.6392	51.8703	34.2921	44.5436	38.3999
1974	14739	S1pr2	18.8708	13.7695	23.4207	11.5306	0	7.48341	5.89249	0	28.7871	24.1642	9.59292	24.8843	5.07531	26.93	28.7185	9.11534	12.7963	15.5626	15.7338	18.797	7.95383	18.5006	14.5406	20.3016	28.8076	33.3097	35.648	36.6057	19.5802	29.4395	30.5765	27.4758
3756	22190	Ubc	7178.99	1847.87	2170.32	1791.08	11750.8	16104.3	14601.6	15249.2	2162.63	2186.05	1544.46	1869.43	12571.5	17896.9	16143.9	18470.7	1525.87	1537.52	1371.36	1336.3	8433.13	9580.67	9279.22	9154.61	1428.79	1476	1251.79	1365.72	8777.07	10654.8	9273.74	9741.33
251	12453	Ccni	272.52	101.894	74.1657	63.4181	11.4866	0	32.4087	8.68159	82.7628	111.155	131.103	119.756	76.1296	107.72	57.4369	63.8074	496.634	506.897	539.671	484.165	481.725	472.426	463.317	442.435	449.649	466.022	477.134	494.624	387.138	384.007	443.926	416.44
2112	243510	Ccdc142	11.2823	22.0312	23.4207	19.2176	5.74328	0	5.89249	0	0	1.61094	38.3717	13.9974	7.61296	3.84714	0	12.1538	9.33782	14.2922	14.1605	18.2274	10.3746	7.59846	10.9055	8.75068	9.39378	15.0836	9.25476	17.8565	10.9924	11.3229	12.0796	16.2206
5686	15505	Hsph1	1967.52	784.862	644.07	638.025	3859.49	4954.02	4160.1	5612.65	575.741	662.098	505.227	763.637	3730.35	4908.95	3778.53	6432.39	353.454	394.782	309.013	408.693	1927.94	2343.96	1643.09	2370.04	303.419	301.044	263.932	355.344	1641.99	2114.46	1601.68	2650.26
1590	229445	Ctso	8.11501	8.2617	0	3.84352	22.9731	7.48341	11.785	13.0224	3.59838	12.8876	0	1.55527	2.53765	3.84714	0	0	12.4504	19.3739	10.699	15.949	11.412	9.2503	14.8711	8.75068	10.02	6.59909	5.4843	6.54737	7.90077	6.1467	6.03981	8.27584
1295	214531	Tmprss13	57.0549	13.7695	19.5173	13.4523	28.7164	37.417	2.94624	17.3632	7.19677	19.3313	9.59292	9.33161	7.61296	26.93	24.6158	33.4229	46.6891	49.2287	36.8172	38.1636	134.869	158.577	122.273	126.01	56.6758	71.9616	63.755	47.022	132.252	148.168	125.326	139.696
2290	16578	Kif9	6.19922	0	11.7104	1.92176	5.74328	14.9668	20.6237	0	3.59838	3.22189	0	7.77634	5.07531	11.5414	4.10264	0	8.64613	6.9873	5.97886	5.98087	7.26219	3.30368	3.96562	6.65052	7.2019	7.85607	8.91199	5.95215	2.40458	4.20564	5.66232	10.9241
1818	27015	Polk	326.46	96.3865	54.6484	86.4793	493.922	523.838	577.464	577.326	129.542	96.6566	95.9292	111.979	426.326	334.701	340.519	443.613	124.504	120.69	127.13	138.13	606.566	614.154	675.147	655.251	140.594	133.239	127.167	142.852	543.779	512.117	508.854	560.771
6061	93893	Pcdhb22	7.22894	2.7539	0	3.84352	11.4866	0	8.83873	8.68159	10.7951	8.05472	6.39528	4.66581	12.6883	0	0	6.07689	4.49599	8.89293	7.23757	7.68969	11.7578	9.58067	10.9055	13.301	5.9494	6.59909	6.16984	9.22584	6.52672	13.911	8.30473	9.26894
743	58801	Pmaip1	1127.16	154.218	81.9726	197.941	1016.56	1025.23	1034.13	1063.5	230.297	204.59	188.661	174.19	989.685	965.633	865.657	832.534	527.76	534.846	576.174	535.43	2589.49	2561.67	2443.48	2708.51	735.22	696.362	674.912	602.655	2636.11	2709.72	2559.37	2825.37
2184	102308570	Lbhd1	180.89	0	3.90346	3.84352	11.4866	0	5.89249	13.0224	10.7951	4.83283	3.19764	10.8869	5.07531	11.5414	12.3079	9.11534	387.347	426.861	410.968	400.718	269.738	302.947	270.984	298.923	328.156	365.464	314.662	372.01	299.886	330.951	337.097	384.992
3301	23972	Papss2	11.8777	5.5078	3.90346	9.60881	0	0	2.94624	17.3632	14.3935	14.4985	12.7906	7.77634	27.9142	23.0829	16.4106	18.2307	5.18768	6.6697	5.97886	3.98724	12.1037	11.2325	12.2273	11.5509	9.08066	11.3127	9.25476	10.7139	14.4275	23.2928	24.9142	21.8482
1522	381549	Zfp69	12.0724	8.2617	3.90346	3.84352	11.4866	7.48341	20.6237	17.3632	17.9919	1.61094	0	12.4422	2.53765	3.84714	16.4106	6.07689	11.4129	16.5154	15.1045	19.9362	13.8327	11.8932	12.8883	13.301	17.8482	14.4552	11.6541	14.2852	17.8626	12.6169	16.232	20.5241
7377	12575	Cdkn1a	1431.48	581.073	960.25	540.015	5145.98	4228.12	3986.27	4505.75	586.536	602.493	511.623	510.128	3215.21	3412.42	3093.39	3527.64	158.397	166.742	148.213	203.065	1121.84	1025.79	964.306	1024.18	180.987	170.634	175.155	160.708	989.314	820.423	809.334	849.763
2695	330216	Mblac1	10.4706	24.7851	27.3242	15.3741	0	7.48341	0	0	14.3935	19.3313	19.1858	10.8869	5.07531	3.84714	4.10264	3.03845	16.2547	13.3394	17.9366	15.949	6.22473	3.96442	5.94843	2.10016	18.7876	11.9412	17.824	16.9636	5.15268	6.79372	5.28483	5.29654
6787	16175	Il1a	49.5889	5.5078	0	3.84352	11.4866	14.9668	8.83873	8.68159	129.542	104.711	67.1505	68.4318	101.506	96.1786	53.3343	100.269	6.57106	4.44646	6.92289	6.55047	10.3746	11.5629	11.2359	12.251	112.725	102.443	92.8904	74.4019	97.2138	89.9359	65.6829	57.5998
6643	76306	Slc18b1	6.66573	0	0	0	5.74328	0	0	0	21.5903	16.1094	9.59292	4.66581	5.07531	11.5414	4.10264	18.2307	0	1.58802	0.314677	0.85441	0.691637	0.660736	1.32187	0.700055	12.8382	11.9412	11.6541	13.9876	12.3664	13.911	16.232	10.9241
5957	20202	S100a9	6.85083	0	0	0	0	0	2.94624	0	21.5903	19.3313	9.59292	15.5527	27.9142	15.3886	8.20528	0	1.72923	0.317605	0.944031	0.284803	1.38327	0.991104	0.330468	0.350027	9.08066	12.8839	11.9969	6.24976	13.7405	11.6464	13.967	5.9586
2452	20536	Slc4a3	17.0995	5.5078	3.90346	1.92176	0	0	14.7312	17.3632	3.59838	4.83283	19.1858	7.77634	2.53765	7.69429	12.3079	0	27.3218	20.3267	19.51	21.3602	21.4408	23.7865	16.1929	14.3511	31.3126	34.8809	33.5914	35.7129	34.0077	31.057	29.444	34.4275
1831	14789	P3h3	8.98473	8.2617	54.6484	7.68705	11.4866	0	8.83873	0	0	14.4985	9.59292	6.22108	15.2259	19.2357	20.5132	6.07689	4.84183	6.6697	5.34951	4.84165	7.60801	6.93773	3.96562	4.90038	6.57565	6.28485	5.4843	6.24976	4.46565	6.1467	8.30473	7.61377
2237	224703	Marchf2	65.6741	16.5234	15.6138	13.4523	0	0	2.94624	8.68159	10.7951	11.2766	9.59292	7.77634	10.1506	23.0829	8.20528	3.03845	120.354	121.96	111.081	108.51	93.7168	105.387	87.9046	102.558	122.745	125.383	129.909	119.638	142.557	152.373	129.856	120.827
3892	11838	Arc	98.2988	19.2773	35.1311	11.5306	143.582	74.8341	79.5486	151.928	43.1806	51.5502	47.9646	62.2108	230.927	234.676	283.082	285.614	22.1341	22.8675	19.1953	18.797	88.8754	94.1549	76.9991	65.1051	40.7064	41.1658	35.3052	40.177	178.626	197.341	181.949	168.827
1428	15502	Dnaja1	3584.68	1272.3	597.229	1285.66	5726.05	6345.93	5680.36	6558.94	1349.39	1430.52	1397.37	1710.8	6430.42	6955.63	6186.78	7453.31	1136.79	1243.42	1144.79	1263.39	4316.16	5122.03	4327.15	5288.21	1252.82	1284	1296.35	1412.74	4698.21	5787.6	4753.7	6417.09
3540	14184	Fgfr3	15.762	0	15.6138	7.68705	11.4866	7.48341	5.89249	0	28.7871	12.8876	22.3835	10.8869	17.7636	26.93	12.3079	27.346	7.95444	4.12886	8.81096	4.27205	9.68292	12.8844	11.8969	17.1513	26.6157	22.3112	21.2517	16.3684	27.4809	32.6746	27.5566	30.1241
8958	74747	Ddit4	778.005	528.749	640.167	345.917	2963.53	2776.34	2577.96	2943.06	169.124	262.584	287.788	206.851	984.61	1577.33	1341.56	1637.72	132.113	113.702	88.7389	111.643	669.851	651.486	657.962	650.701	51.3527	70.0761	68.8966	77.6756	353.474	421.858	365.031	390.289
2818	319615	Zfp944	59.7459	2.7539	0	11.5306	11.4866	7.48341	26.5162	13.0224	14.3935	22.5532	6.39528	13.9974	27.9142	11.5414	8.20528	18.2307	84.3862	95.9166	94.0884	89.9978	97.8667	109.682	109.055	117.609	85.1703	97.101	91.8621	104.163	105.802	119.375	116.644	137.379
6522	109050	Inka2	105.372	33.0468	31.2277	28.8264	166.555	194.569	159.097	177.973	21.5903	11.2766	19.1858	18.6632	93.8932	88.4843	118.976	127.615	46.3433	52.0871	43.7401	48.7013	227.549	243.481	219.761	220.167	36.3226	32.9955	27.4215	42.8555	188.244	174.049	191.764	180.082
5519	641361	Pinlyp	15.2002	5.5078	7.80691	5.76528	22.9731	7.48341	20.6237	13.0224	28.7871	35.4408	12.7906	29.5501	25.3765	34.6243	41.0264	36.4614	2.07507	4.44646	3.77612	3.13284	5.87892	5.28589	5.61796	5.25041	13.4644	16.3406	13.368	9.52344	9.27482	17.1461	12.8346	16.5517
3607	19128	Pros1	8.52301	0	3.90346	13.4523	5.74328	0	8.83873	8.68159	0	8.05472	9.59292	10.8869	25.3765	15.3886	16.4106	24.3076	3.8043	0.952814	0.314677	3.98724	6.22473	6.93773	4.95702	4.20033	10.6463	9.74152	9.25476	9.22584	11.3359	10.0288	11.7021	10.262
3713	71839	Osgin1	314.513	220.312	320.083	180.646	1229.06	1309.6	1122.52	1501.92	129.542	106.322	79.941	99.5372	360.347	430.88	377.443	379.806	67.7857	53.6752	59.7886	58.6695	261.439	274.866	252.808	270.921	37.8883	33.624	32.2203	31.2488	151.145	128.11	102.677	85.0756
492	65112	Pmepa1	138.634	90.8787	85.876	84.5575	0	14.9668	5.89249	30.3856	205.108	144.985	191.858	153.972	93.8932	76.9429	65.6422	78.9996	159.089	131.171	145.695	123.32	73.3135	74.9935	72.3725	76.306	408.63	340.639	359.907	329.154	184.466	150.432	184.969	159.227
25	66085	Eif3f	2571.63	4563.21	6530.48	4485.39	1941.23	1878.34	1699.98	1983.74	4321.66	4376.93	4185.71	3791.75	3062.95	2700.69	2843.13	2916.91	1608.87	1587.39	1637.58	1581.8	2150.3	2122.61	2024.45	2059.56	1339.55	1441.43	1466.02	1381.49	1947.71	2025.18	2024.84	2039.5
7987	69327	1700007K13Rik	26.114	11.0156	7.80691	5.76528	22.9731	82.3175	23.57	56.4304	10.7951	8.05472	12.7906	6.22108	55.8284	53.86	32.8211	36.4614	5.87937	6.6697	8.49628	4.55685	21.4408	34.0279	32.7164	22.4017	12.8382	13.1982	11.9969	13.0947	42.252	51.7617	39.2587	62.2343
5013	29813	Zfp385a	291.552	140.449	245.918	136.445	861.492	860.592	804.325	915.908	158.329	191.702	204.649	166.414	662.328	904.079	750.783	1008.76	20.059	15.245	21.7127	16.2338	136.598	120.584	88.896	107.808	30.6864	21.997	25.0221	25.2967	104.771	107.405	90.5971	93.0204
2759	13197	Gadd45a	122.115	63.3397	105.393	71.1052	298.651	434.038	356.496	499.192	61.1725	86.991	111.917	59.1002	58.366	111.567	114.874	133.692	44.2682	53.3576	50.9777	46.7077	135.215	160.889	166.556	208.966	32.252	50.9073	45.931	43.1531	32.6336	49.1736	43.4111	55.2826
2322	56541	Habp4	26.0721	19.2773	27.3242	13.4523	0	7.48341	2.94624	4.3408	14.3935	12.8876	22.3835	6.22108	2.53765	3.84714	16.4106	24.3076	38.043	43.5118	49.719	40.7269	34.236	22.1347	24.1242	33.2526	49.4739	49.6503	56.5569	48.2124	32.2901	37.2037	33.2189	38.0689
941	102141	Snx25	89.8985	35.8007	23.4207	38.4352	11.4866	7.48341	8.83873	4.3408	21.5903	22.5532	22.3835	24.8843	12.6883	15.3886	49.2317	21.2691	166.006	170.236	166.149	187.685	154.581	135.451	135.492	148.412	148.735	141.095	151.504	159.518	154.924	145.58	138.161	163.531
10153	16476	Jun	261.59	159.726	202.98	99.9316	671.964	860.592	598.088	824.751	111.55	136.93	99.1269	82.4293	203.012	346.243	209.235	589.459	81.2736	74.3195	72.3757	78.3209	369.68	398.754	333.112	393.081	76.7159	83.9028	54.843	62.2	166.603	240.692	137.406	289.985
495	21933	Tnfrsf10b	362.494	148.711	187.366	192.176	855.749	823.175	875.035	863.818	187.116	212.645	204.649	236.401	756.221	919.467	738.475	881.149	85.7696	85.7532	88.4242	101.96	316.078	301.956	305.022	293.673	92.6853	84.5313	88.0916	86.9014	309.161	307.011	306.898	301.241
1635	217684	Susd6	374.147	99.1404	109.297	103.775	499.666	583.706	477.292	477.488	125.943	95.0457	76.7434	107.314	451.702	450.116	336.416	385.883	192.29	208.984	183.142	208.191	715.153	755.552	691.34	710.905	213.552	197.659	177.212	202.671	692.176	647.992	700.24	721.984
1772	15368	Hmox1	438.801	245.097	339.601	240.22	1366.9	1302.11	1146.09	1367.35	298.666	272.25	243.021	283.059	728.307	869.454	857.451	780.881	87.4988	98.1398	94.7178	85.1562	373.83	364.066	325.511	351.077	91.1197	103.072	100.089	100.889	268.283	296.983	265.374	256.551
9316	230837	Asap3	12.2747	0	3.90346	11.5306	28.7164	37.417	32.4087	17.3632	3.59838	9.66566	6.39528	9.33161	22.8389	11.5414	24.6158	24.3076	1.72923	2.85844	2.20274	3.70244	13.1411	16.188	12.8883	12.601	2.50501	6.59909	2.05661	2.38086	14.771	13.911	9.81468	19.531
3982	210719	Mkx	22.0849	5.5078	3.90346	11.5306	17.2298	37.417	26.5162	4.3408	3.59838	12.8876	9.59292	10.8869	5.07531	15.3886	28.7185	9.11534	22.4799	42.2414	33.0411	36.7396	39.0775	51.5374	42.9609	53.5542	10.3332	16.9691	14.3963	20.2373	21.9848	23.6163	27.9341	25.8206
3505	434484	Sp140	19.2303	5.5078	0	9.60881	22.9731	22.4502	14.7312	8.68159	3.59838	3.22189	12.7906	0	10.1506	0	0	3.03845	43.5765	37.4773	39.0199	39.3028	47.723	60.7877	42.9609	45.1535	13.4644	13.1982	16.1101	9.22584	16.1451	20.7047	14.3445	20.193
7570	68591	Mocos	69.1336	22.0312	46.8415	24.9829	201.015	89.8009	100.172	156.269	28.7871	46.7174	25.5811	32.6606	147.184	119.261	176.413	157.999	16.2547	18.1035	12.2724	14.525	72.6219	85.235	81.6257	79.4562	20.3532	17.2833	15.7674	20.8325	77.2902	87.6713	76.63	71.5033
7366	57436	Gabarapl1	418.938	156.972	160.042	157.584	608.788	808.208	777.809	685.846	100.755	127.265	115.115	125.977	586.198	600.154	603.088	507.421	149.405	142.922	162.688	147.813	691.637	787.597	723.395	733.657	168.149	143.609	159.388	146.125	671.222	750.868	623.987	663.391
4118	225256	Dsg1b	29.5782	5.5078	0	5.76528	11.4866	7.48341	14.7312	8.68159	39.5822	67.6596	28.7788	32.6606	30.4518	46.1657	32.8211	39.4998	11.4129	12.7042	12.2724	11.6769	8.99128	12.2236	16.8539	17.8514	48.2214	72.9043	48.3304	49.7005	49.1222	60.4965	61.908	50.9792
5463	16002	Igf2	6.3283	2.7539	3.90346	3.84352	5.74328	7.48341	8.83873	13.0224	3.59838	14.4985	12.7906	7.77634	5.07531	3.84714	4.10264	3.03845	7.26275	5.71688	4.72015	6.55047	7.95383	8.58957	8.92264	6.30049	5.63627	4.71364	6.16984	2.08325	4.12214	3.55862	5.28483	8.27584
3314	99470	Magi3	30.6827	5.5078	3.90346	1.92176	0	0	8.83873	21.704	79.1644	20.9423	22.3835	26.4396	15.2259	23.0829	20.5132	9.11534	20.059	18.4211	19.51	18.5122	21.0949	17.8399	16.8539	16.1013	67.3221	59.0776	69.9249	64.5809	71.794	71.4958	65.6829	74.1515
2070	104479	Ccdc117	473.498	101.894	167.849	151.819	585.815	651.056	612.819	685.846	172.722	148.207	105.522	155.527	560.822	600.154	492.317	583.382	236.904	248.049	234.12	260.31	852.097	894.967	853.269	900.97	225.138	235.682	232.055	264.871	793.856	858.92	842.553	968.935
3786	330463	Zfp78	11.3189	0	7.80691	1.92176	17.2298	0	8.83873	0	7.19677	4.83283	19.1858	10.8869	12.6883	7.69429	32.8211	9.11534	11.7587	7.94011	8.49628	11.9617	7.60801	7.59846	11.8969	8.40066	15.9694	17.2833	11.6541	16.0708	17.8626	17.1461	18.4969	20.5241
6908	71522	Ggt6	21.2177	8.2617	3.90346	3.84352	0	14.9668	20.6237	13.0224	39.5822	28.997	31.9764	27.9948	25.3765	30.7771	36.9237	60.7689	7.60859	7.30491	5.97886	3.98724	9.3371	12.554	10.9055	11.2009	25.6763	22.6255	20.9089	20.8325	34.0077	43.3504	34.7289	39.724
2343	231214	Cc2d2a	7.02118	2.7539	7.80691	1.92176	5.74328	14.9668	8.83873	8.68159	3.59838	9.66566	12.7906	12.4422	0	7.69429	8.20528	6.07689	5.87937	10.481	8.49628	11.6769	8.29965	4.62515	7.2703	5.25041	6.57565	7.54182	4.79877	8.92823	4.80917	2.91159	5.28483	3.64137
3748	244144	Usp35	7.191	0	3.90346	1.92176	0	0	5.89249	8.68159	7.19677	12.8876	3.19764	9.33161	15.2259	23.0829	16.4106	15.1922	3.45845	1.58802	2.51742	3.13284	1.38327	1.98221	2.64375	1.05008	7.51503	5.34212	8.56923	8.92823	14.084	11.9699	16.232	9.59997
9230	213783	Plekhg1	139.987	68.8475	74.1657	42.2787	258.448	276.886	276.947	247.425	64.7709	62.8268	44.767	49.7686	170.023	215.44	160.003	206.614	54.9894	52.0871	47.2015	58.6695	269.393	242.82	218.44	203.716	52.6052	51.2215	43.1889	40.4746	212.977	184.401	190.254	197.958
4502	381199	Tmem151a	7.19	0	15.6138	1.92176	5.74328	7.48341	14.7312	13.0224	17.9919	8.05472	3.19764	7.77634	0	3.84714	4.10264	3.03845	4.49599	5.71688	5.97886	5.69606	7.26219	4.95552	5.94843	8.40066	8.14128	8.79879	9.59753	12.2019	5.49619	10.3523	6.03981	7.28274
8	20085	Rps19	6645.54	11153.3	10918	11107.8	3922.66	3412.43	3125.97	3893.69	10957.1	10198.9	10379.5	9445.15	7722.08	6886.39	6498.58	6362.51	5267.91	5353.86	5296.01	4898.05	5952.58	6101.57	5674.47	6065.62	4967.12	5107.07	5172.38	4574.53	6186.3	6623.55	6427.11	6359.49
3	20103	Rps5	10883	16831.8	17842.7	17518.8	6679.44	5837.06	5273.78	5912.16	16045.2	15363.6	16298.4	15726.9	10947.4	9902.55	9903.77	9756.45	9325.72	9571.97	9270.38	8962.47	10733.2	11670.6	10514.2	11089.6	8389.27	8254.52	8537.01	7877.67	10671.2	10933.7	10590.8	11141.6
10225	15422	Hoxc13	41.3664	30.2929	50.7449	15.3741	155.069	82.3175	123.742	104.179	14.3935	17.7204	15.9882	15.5527	48.2154	46.1657	61.5396	60.7689	11.4129	16.1978	12.9018	11.9617	55.6768	59.4662	40.3171	60.2047	9.70691	9.74152	7.54092	8.92823	24.3893	35.2626	33.2189	43.3654
726	14630	Gclm	587.452	297.421	253.725	272.89	1401.36	1055.16	1004.67	1098.22	269.879	249.696	297.381	247.288	1032.83	1038.73	1025.66	972.303	251.429	248.684	254.574	237.811	809.215	762.489	703.567	706.355	254.258	229.711	220.4	221.42	762.596	665.138	699.107	667.033
3269	15519	Hsp90aa1	27215.5	13339.9	6807.63	14023.1	41196.6	48724.5	43890.2	46989.1	15530.6	15784	13471.7	15950.8	41414.5	42934.1	37785.3	46242.1	12041.3	12353.5	12003	12252.2	36176.4	41171.5	36838	40881.4	13944.4	13438.6	13217.9	13792.9	31634.3	38513.9	31356	39981.2
8846	17864	Mybl1	158.817	30.2929	3.90346	36.5135	97.6358	104.768	97.2261	130.224	25.1887	32.2189	22.3835	23.329	81.2049	100.026	82.0528	124.576	92.6865	107.35	91.2563	105.092	454.406	381.575	398.214	441.034	98.9478	94.587	94.2615	97.9129	357.252	364.273	348.421	404.523
7701	18412	Sqstm1	5570.51	3059.58	4278.19	2959.51	13192.3	14697.4	12774.9	13170	3796.29	3569.85	4003.45	2818.15	9561.88	10768.2	10203.3	10096.8	1408.63	1362.21	1461.05	1241.74	5368.49	6076.46	5686.04	5580.14	1892.22	1672.71	1877	1510.95	4849.7	4885.33	4661.6	4201.81
5287	52150	Kcnk6	15.6675	2.7539	7.80691	1.92176	0	0	5.89249	4.3408	10.7951	9.66566	19.1858	6.22108	17.7636	15.3886	16.4106	30.3845	2.07507	6.03449	3.14677	5.69606	7.95383	10.2414	10.575	10.1508	22.8582	23.254	22.9655	27.6775	45.0001	44.968	50.2059	44.3585
29	55949	Eef1b2	8268.79	9473.42	7365.82	10075.8	3451.71	2948.46	2928.57	2930.04	10277	9531.95	9871.12	10025.3	7128.27	5482.18	5797.03	5195.74	8620.54	9040.61	8895.29	8970.73	10371.8	10978.5	10135.1	10749	8290.95	8080.12	8283.36	7946.42	10450	11366.9	10604.4	11066.5
4927	235493	Fam214a	6.94539	11.0156	0	3.84352	0	14.9668	5.89249	0	0	8.05472	0	3.11054	22.8389	3.84714	8.20528	18.2307	4.15014	2.85844	4.0908	2.56323	4.84146	11.2325	6.2789	4.90038	3.75751	6.28485	7.88369	3.27368	15.1145	12.6169	15.8545	9.59997
2701	68559	Pdrg1	380.075	140.449	171.752	180.646	648.991	666.023	580.41	659.801	97.1563	117.599	111.917	144.64	487.23	434.727	451.29	455.767	207.161	218.194	210.834	236.387	608.987	706.988	662.258	729.457	145.291	149.579	149.447	165.767	487.1	578.76	563.967	613.736
5498	245527	Eda2r	396.39	107.402	101.49	113.384	356.084	389.137	453.722	403.694	165.526	156.262	143.894	88.6503	251.228	300.077	205.132	291.691	291.202	274.728	289.818	268	920.915	957.407	951.749	927.222	326.591	280.933	311.577	286.001	662.978	665.461	652.299	693.846
2345	11783	Apaf1	524.881	203.789	152.235	182.567	648.991	666.023	777.809	612.052	190.714	214.256	185.463	211.517	652.177	657.861	562.061	628.958	298.81	307.441	264.329	305.879	930.944	878.449	892.595	870.168	294.965	340.325	298.209	363.379	882.825	912.3	879.547	1004.69
268	381085	Tbc1d22b	92.8297	90.8787	109.297	53.8093	40.203	7.48341	14.7312	39.0672	68.3693	82.1581	67.1505	54.4344	71.0543	84.6371	94.3607	51.6536	121.738	106.08	131.85	103.953	132.103	139.085	112.029	129.51	115.23	114.384	111.743	113.091	119.199	131.345	128.723	138.372
8242	71901	Fam219a	14.8334	2.7539	3.90346	7.68705	17.2298	37.417	17.6775	13.0224	10.7951	14.4985	6.39528	3.11054	30.4518	30.7771	20.5132	27.346	3.8043	3.17605	7.86692	2.84803	24.2073	20.1524	16.5234	19.6015	7.82815	5.97061	7.19815	5.95215	23.0153	21.6752	22.2718	24.1655
5422	230784	Sesn2	459.155	269.882	339.601	217.159	1085.48	965.36	895.658	928.93	140.337	151.429	207.847	185.077	474.541	596.307	406.161	628.958	236.212	220.1	185.345	212.178	935.093	904.217	785.854	876.818	121.18	145.494	147.391	168.148	440.039	439.327	420.521	503.171
8396	268390	Ahsa2	366.894	165.234	132.718	224.846	476.692	785.758	598.088	690.187	244.69	201.368	140.696	181.966	677.554	780.97	496.419	817.342	122.429	134.664	113.598	134.427	373.484	497.534	341.704	463.086	143.099	146.751	142.935	142.554	411.527	548.997	395.23	647.171
4375	56812	Dnajb2	234.742	104.648	31.2277	107.619	241.218	314.303	276.947	381.99	93.558	146.596	102.325	118.2	322.282	346.243	418.469	568.189	97.5283	104.81	122.095	101.39	232.736	337.636	268.671	318.875	144.977	162.463	149.447	156.542	323.588	418.299	337.097	427.033
591	57294	Rps27	222.219	280.898	42.938	278.655	91.8925	44.9004	73.6561	34.7264	359.838	206.201	342.148	318.83	243.615	96.1786	106.669	106.346	262.496	251.225	270.937	261.449	251.064	307.573	250.164	284.222	251.44	225.626	255.363	237.789	289.237	307.982	254.804	299.916
2629	231470	Fras1	13.5496	2.7539	3.90346	7.68705	5.74328	0	5.89249	34.7264	3.59838	11.2766	9.59292	15.5527	7.61296	0	4.10264	3.03845	19.0215	14.9274	13.5311	16.8034	14.1786	13.8755	17.1843	10.5008	25.9895	25.7679	17.1385	25.2967	21.2977	22.3222	21.8943	24.8275
7263	66090	Ypel3	15.9259	0	7.80691	7.68705	11.4866	22.4502	14.7312	4.3408	17.9919	14.4985	31.9764	27.9948	15.2259	23.0829	20.5132	36.4614	7.95444	4.44646	9.75499	6.26567	12.1037	12.8844	11.8969	11.5509	16.5957	19.483	18.1668	12.2019	23.3588	26.5279	20.7618	23.5034
7552	11853	Rhoc	6.93004	0	3.90346	0	0	0	2.94624	4.3408	10.7951	14.4985	15.9882	12.4422	10.1506	23.0829	8.20528	3.03845	3.11261	1.90563	1.88806	0.85441	1.72909	3.63405	2.31328	2.10016	6.57565	11.627	10.6258	7.7378	11.3359	13.5874	10.1922	16.2206
6	20084	Rps18	8653.98	13587.7	12815	13823.2	4818.61	4070.97	4039.3	4510.09	13925.7	12607.2	13241.4	12347.3	8993.45	7532.71	7795.01	7055.27	7718.57	7965.52	7856.23	7568.65	8587.37	9097.01	8246.17	8820.34	6799.22	6720.39	6854.7	6500.94	8463.1	8992.62	8185.82	8733.66
4	26451	Rpl27a	13133.9	16126.8	17713.9	17338.1	5703.08	5612.56	4993.88	5573.58	17164.3	16462.2	16586.2	16513.8	11381.4	9779.44	9448.38	9592.38	13176.4	13856.1	13604.1	13250.5	14805.5	15281.8	13951	15108.6	12999.7	12931.4	12810	12558.7	15329.2	16083.3	15315.1	16098.8
5279	14245	Lpin1	5.98217	0	3.90346	3.84352	17.2298	0	8.83873	13.0224	0	3.22189	0	3.11054	12.6883	3.84714	8.20528	6.07689	0.345845	0.952814	1.25871	1.99362	5.87892	11.5629	10.9055	12.951	2.19188	0.942728	2.39938	1.78565	7.55726	12.2934	13.2121	15.2275
8200	81489	Dnajb1	1387.84	583.827	671.395	574.607	2044.61	2230.06	1844.35	2387.44	856.415	770.031	626.738	710.758	2481.83	2850.73	2654.41	3424.33	408.443	424.955	435.513	437.173	1382.24	1511.76	1309.32	1505.82	552.668	529.813	562.484	591.942	1921.61	2270.4	1942.17	2525.12
2366	216505	Pik3ip1	35.3474	38.5546	89.7795	26.9047	0	0	5.89249	4.3408	28.7871	32.2189	25.5811	32.6606	12.6883	7.69429	0	3.03845	87.8447	80.6716	69.2289	76.0425	17.9826	19.4917	19.8281	21.7017	78.5946	81.0746	81.579	75.89	16.4886	13.5874	21.1393	26.4827
74	27370	Rps26	8633.39	10974.3	16371.1	9522.33	4657.8	3838.99	3069.99	3776.49	10723.2	9586.73	10245.2	8359.57	6562.37	6201.59	6297.55	6398.97	9427.05	9452.86	9364.16	8849.41	9636.23	10150.6	9051.2	9869.37	8436.24	8437.1	8852.7	7959.81	10187.9	10024	10792.4	10558
725	67035	Dnajb4	788.755	360.761	152.235	286.342	930.412	1055.16	978.153	868.159	521.766	438.177	434.879	455.694	1393.17	1573.48	1489.26	1610.38	344.808	320.781	338.592	316.132	769.446	810.723	800.064	807.163	500.375	439.311	464.795	416.948	1225.31	1505.29	1294.41	1549.24
8431	78088	Sowahb	37.3292	2.7539	11.7104	3.84352	5.74328	29.9336	20.6237	17.3632	17.9919	30.6079	12.7906	17.108	45.6778	80.79	32.8211	75.9612	7.60859	9.52814	11.3284	9.96811	50.4895	38.3227	38.3343	33.2526	33.8176	38.3376	40.7895	27.3799	102.367	107.405	101.922	100.634
9397	80888	Hspb8	462.955	104.648	226.4	174.88	539.869	636.09	515.593	572.985	262.682	304.468	300.578	214.627	647.102	765.581	857.451	881.149	170.156	149.909	184.401	150.091	508.353	607.547	494.05	556.543	332.227	312.671	350.653	268.74	766.375	880.596	740.254	874.922
5351	15481	Hspa8	54930	27539	27499.9	31983.9	92242.9	100719	92830.3	107092	20190.5	24046.6	22044.5	31869	89447.2	92543	87455.9	104605	24489	29932.3	25624.8	32980.8	77778.1	88647.3	79549.3	90353.6	16103.8	17967.4	16712	21831.6	51437.5	59882.1	52100.5	65330.8
6162	24055	Sh3bp2	119.874	63.3397	74.1657	63.4181	201.015	306.82	235.7	169.291	75.566	46.7174	57.5575	66.8766	187.786	203.899	237.953	179.268	41.8473	40.0182	45.3135	38.4484	124.841	144.04	112.029	98.0077	60.4333	62.22	71.9815	55.9502	172.099	175.99	169.115	134.4
9915	238377	Gpr68	70.5976	16.5234	39.0346	11.5306	74.6627	52.3838	50.0862	82.4751	10.7951	28.997	15.9882	35.7712	106.581	130.803	98.4633	85.0765	30.7802	30.1724	22.6567	30.1891	83.3423	105.057	82.9475	96.2575	35.3832	42.1085	42.8461	35.4153	172.443	195.077	159.3	185.379
164	76524	Cln6	89.5278	195.527	230.304	153.741	74.6627	37.417	61.8711	52.0896	118.747	132.097	134.301	88.6503	93.8932	100.026	82.0528	57.7305	103.062	78.7659	83.7041	90.2826	94.4085	97.1282	92.5311	74.2058	50.7264	57.5064	55.1858	47.6172	63.2062	54.0263	57.0007	62.8964
6482	29810	Bag3	1894.83	1357.67	1947.82	1095.4	4445.3	5328.19	3983.32	5365.22	1349.39	1387.02	1330.22	1178.89	3986.65	5970.77	4558.03	7106.93	217.191	196.597	200.135	202.495	754.23	810.393	667.215	787.211	226.703	227.826	229.312	233.622	778.398	957.915	765.923	1093.74
724	225849	Ppp2r5b	61.5153	19.2773	46.8415	42.2787	11.4866	22.4502	11.785	8.68159	17.9919	64.4378	41.5693	49.7686	27.9142	46.1657	65.6422	45.5767	52.5685	55.8984	52.8657	64.3655	63.2848	69.3773	57.171	67.2052	104.584	125.383	105.916	97.9129	120.229	123.581	110.226	114.538
1273	72128	2610008E11Rik	29.845	8.2617	7.80691	13.4523	11.4866	37.417	26.5162	21.704	28.7871	17.7204	15.9882	18.6632	20.3012	7.69429	0	27.346	41.5014	39.0654	46.8869	42.1509	30.0862	29.7331	31.064	42.3533	51.0396	51.2215	42.5034	53.2718	29.542	35.9097	40.7687	54.9516
8867	235086	Igsf9b	143.552	63.3397	62.4553	44.2005	178.042	224.502	150.258	186.654	0	4.83283	9.59292	0	10.1506	23.0829	28.7185	27.346	185.027	189.292	167.408	180.28	601.033	605.234	479.509	550.943	21.6057	29.853	26.736	34.5225	94.8093	84.7597	77.0075	108.91
5381	65079	Rtn4r	6.64942	8.2617	11.7104	5.76528	34.4597	7.48341	23.57	4.3408	10.7951	1.61094	6.39528	0	0	0	0	0	5.87937	7.30491	6.92289	5.98087	11.0662	9.58067	8.92264	6.30049	4.38377	4.71364	4.79877	1.48804	4.80917	2.26457	3.0199	4.30344
457	68394	Ccdc163	31.9038	49.5702	66.3588	44.2005	22.9731	29.9336	14.7312	21.704	43.1806	33.8298	70.3481	31.1054	45.6778	26.93	41.0264	48.6151	19.3673	25.0908	22.9714	23.0691	30.0862	31.0546	27.4289	29.7523	25.6763	25.7679	26.3932	21.1301	23.7023	22.3222	21.5168	23.5034
3594	210503	Zfp677	33.7616	5.5078	3.90346	9.60881	5.74328	14.9668	20.6237	17.3632	14.3935	11.2766	6.39528	17.108	12.6883	3.84714	12.3079	15.1922	48.7642	60.9801	54.4391	61.5175	60.8641	59.4662	64.1108	70.7055	46.3427	44.9367	50.387	51.1885	38.4733	55.3203	47.941	60.2481
43	19943	Rpl28	8898.47	16418.8	22253.6	15564.3	7121.67	6503.08	5795.26	6380.97	16214.3	15463.4	15665.2	13683.3	10612.5	10225.7	10297.6	10069.4	5842.36	5674.01	5611.01	5011.68	6211.94	6587.21	5911.75	6593.81	5240.48	5122.15	5150.45	4784.34	6347.07	6420.39	6610.57	6464.09
2873	14828	Hspa5	9767.03	5554.62	5074.49	5127.26	15208.2	16336.3	15877.3	20610.1	7297.52	8703.93	6711.85	12468.6	17121.6	20647.6	17469	27066.5	2963.2	3429.18	2732.97	3808.67	6275.57	6760.98	6546.91	8502.51	3926.29	4397.83	3673.46	6474.75	8193.44	11017.8	8530.85	14268.5
5368	227541	Camk1d	42.6275	2.7539	0	5.76528	0	7.48341	14.7312	4.3408	57.5741	53.1611	86.3363	45.1028	78.6673	103.873	90.258	51.6536	7.26275	6.35209	7.23757	7.68969	8.29965	6.60736	10.2445	7.35057	75.1503	82.3316	89.4627	69.6402	94.8093	81.2011	93.617	72.4964
2161	66079	Tmem42	10.3042	11.0156	50.7449	19.2176	11.4866	0	8.83873	0	7.19677	12.8876	3.19764	7.77634	2.53765	3.84714	0	9.11534	10.7212	17.7859	20.454	16.8034	14.5244	13.2147	10.575	9.45074	7.51503	6.91334	10.2831	6.54737	4.80917	8.41127	5.28483	8.27584
6335	21814	Tgfbr3	8.86799	11.0156	3.90346	5.76528	11.4866	14.9668	17.6775	17.3632	7.19677	0	6.39528	6.22108	7.61296	7.69429	0	12.1538	12.7963	11.1162	6.92289	12.2465	18.6742	18.1702	15.532	12.951	6.57565	3.45667	5.82707	2.38086	6.18321	3.88213	3.77488	4.9655
33	76808	Rpl18a	12556.4	18564	25665.2	18285.6	8132.49	7408.57	6796.99	7574.69	17002.4	16423.6	16829.2	15291.4	10386.6	9471.67	9674.02	9789.87	12051	11929.2	11734	11299.6	12835.7	13886	12086.2	13350.7	10552.3	10437.3	10524.7	9542.49	13018.1	13160.4	12581.3	12964.6
6119	171388	Bnipl	11.1509	2.7539	7.80691	1.92176	5.74328	0	8.83873	13.0224	17.9919	25.7751	25.5811	17.108	15.2259	19.2357	32.8211	24.3076	2.42092	4.76407	5.03483	3.70244	3.45819	6.27699	5.61796	4.90038	10.3332	9.42728	9.25476	11.0115	10.9924	14.558	13.2121	12.5793
330	386655	Eid2	78.9288	101.894	245.918	115.306	28.7164	22.4502	35.3549	34.7264	143.935	143.374	179.068	129.087	109.119	123.109	135.387	69.8843	42.8848	48.5935	45.9428	50.695	31.4695	32.3761	32.0554	30.1024	85.7965	64.1055	86.035	71.1282	55.6489	51.1147	50.2059	51.3102
50	20055	Rps16	10466.5	19304.8	26426.4	17699.4	8425.4	7775.26	6900.1	7461.83	18632.4	17680.1	18901.3	16593.2	13251.6	11495.3	12238.2	12017.1	6821.8	6094.83	6445.21	6550.19	6853.78	7384.39	6804.34	7190.61	6313.87	6178.64	6429.66	5872.99	7647.6	8085.17	7298.73	7686.27
2190	22682	Zfand5	1223.66	611.366	343.504	680.303	1728.73	1541.58	1938.63	1862.2	662.102	542.888	534.006	648.547	1624.1	1554.25	1505.67	1276.15	773.656	752.723	804.629	823.366	2034.45	1978.9	2071.71	2036.81	797.532	749.783	758.548	708.009	1780.42	1596.85	1623.58	1588.63
85	67427	Rps20	5656.32	7129.85	3942.49	7487.18	2268.6	2289.92	1850.24	2118.31	7376.68	7134.87	6785.39	6899.17	4001.88	3693.26	4045.2	3354.44	6520.22	6720.2	6862.48	6311.52	6640.75	7090.69	6593.17	6921.44	5942.51	5927.56	6112.26	5597.7	6739.7	6977.15	7028.82	6982.16
3039	53859	Map3k14	144.569	79.8631	113.2	82.6357	223.988	359.204	229.807	347.264	57.5741	83.7691	92.7316	68.4318	195.399	184.663	221.542	230.922	71.9358	75.2723	78.0399	63.7959	185.013	180.381	185.393	161.363	90.8066	76.9894	74.3809	68.4498	148.741	145.58	147.598	156.91
2639	213948	Atg9b	221.297	101.894	218.594	98.0098	264.191	508.872	453.722	447.102	183.518	106.322	201.451	97.9819	266.454	323.16	356.929	431.459	102.024	100.998	99.4379	99.1115	209.566	239.517	233.311	214.567	114.604	124.44	123.74	118.15	232.214	260.102	248.387	280.385
4639	329828	Myorg	9.22872	5.5078	7.80691	5.76528	5.74328	22.4502	8.83873	0	7.19677	4.83283	0	13.9974	27.9142	26.93	20.5132	18.2307	4.15014	1.90563	0.629354	1.13921	2.76655	6.27699	7.60077	4.55036	2.81813	6.59909	5.14154	6.54737	16.1451	13.911	16.6095	13.5724
6520	11727	Ang	16.3699	2.7539	3.90346	7.68705	22.9731	22.4502	0	13.0224	64.7709	28.997	35.1741	34.2159	15.2259	11.5414	28.7185	36.4614	6.57106	5.71688	5.97886	7.68969	8.29965	10.5718	6.93983	11.5509	12.525	13.1982	12.3397	15.7732	9.96184	14.2345	17.3644	20.8551
3252	29870	Gtse1	761.192	476.425	679.201	453.536	1803.39	1676.28	1532.05	1562.69	399.42	517.113	505.227	521.015	1451.54	1588.87	1444.13	1652.91	257.309	244.556	238.84	248.918	697.516	689.808	672.172	640.2	226.39	251.394	261.19	255.347	689.428	669.02	597.563	693.515
3681	67011	Mettl6	211.847	68.8475	46.8415	57.6528	143.582	187.085	203.291	186.654	82.7628	62.8268	54.3599	62.2108	157.335	134.65	135.387	133.692	157.705	168.966	190.065	181.704	411.178	445.666	406.476	457.136	164.391	178.176	161.787	152.673	455.153	455.826	396.74	466.426
7351	55984	Camkk1	27.1252	19.2773	0	5.76528	5.74328	29.9336	14.7312	30.3856	25.1887	20.9423	19.1858	21.7738	40.6025	57.7071	36.9237	60.7689	13.8338	10.7986	14.4751	9.68331	21.4408	17.5095	23.1328	21.3517	26.9288	25.1394	25.7077	28.5703	53.2443	51.7617	49.4509	58.924
8047	76072	Rnf183	42.1847	22.0312	27.3242	5.76528	45.9463	37.417	58.9249	47.7488	7.19677	14.4985	22.3835	13.9974	48.2154	38.4714	24.6158	57.7305	30.4344	31.1252	25.4888	27.9107	82.9965	78.958	62.4585	88.5569	26.6157	25.1394	21.9372	31.2488	87.5955	76.3485	69.4578	69.186
5651	233060	Zfp382	20.9574	16.5234	3.90346	11.5306	11.4866	37.417	23.57	30.3856	21.5903	19.3313	28.7788	13.9974	25.3765	15.3886	16.4106	9.11534	18.3298	12.069	12.5871	15.949	22.4782	22.465	23.1328	20.6516	22.232	18.8546	24.6794	35.1177	26.4504	28.4689	30.954	30.4551
52	20463	Cox7a2l	774.589	611.366	581.615	566.92	281.421	246.952	259.27	303.856	471.388	486.505	390.112	416.812	393.336	442.421	381.545	376.767	1091.49	1085.89	1065.81	1008.2	1495.67	1570.9	1403.83	1514.92	774.361	738.156	763.689	764.852	1087.9	1128.4	1134.73	1173.18
3951	68567	Cgref1	59.8594	11.0156	27.3242	30.7482	74.6627	119.735	64.8174	52.0896	39.5822	22.5532	35.1741	27.9948	50.7531	76.9429	69.7448	36.4614	48.7642	41.9238	41.2227	45.5685	96.1376	95.8067	98.81	89.957	31.9389	38.3376	43.1889	41.9627	110.267	97.3767	89.8421	104.938
1350	67122	Nrarp	95.92	68.8475	31.2277	38.4352	5.74328	7.48341	5.89249	13.0224	46.779	38.6627	31.9764	54.4344	35.5272	46.1657	28.7185	39.4998	191.944	190.88	196.988	172.591	91.6419	106.709	85.5913	94.5074	206.037	222.798	226.913	208.325	126.756	117.758	123.816	117.848
4173	12759	Clu	89.9206	44.0624	42.938	67.2616	103.379	179.602	156.151	204.017	64.7709	91.8238	63.9528	87.0951	180.173	242.37	201.029	285.614	25.9384	25.726	23.9155	21.9298	49.4521	60.4573	47.257	59.1546	35.3832	24.1967	26.0504	26.4871	74.1986	88.9654	68.3253	115.862
2013	74041	Ddias	600.797	179.004	93.683	211.394	534.125	441.521	545.055	512.214	197.911	149.818	127.906	175.745	553.209	484.74	434.88	364.614	490.408	569.783	550.999	621.725	1295.78	1199.9	1292.79	1337.8	409.569	467.593	456.911	509.207	1140.12	1082.79	1071.31	1122.2
5664	69608	Sec24d	401.706	228.574	281.049	255.594	666.221	875.559	754.239	759.639	323.854	378.572	415.693	356.157	751.146	846.371	890.272	1026.99	114.475	114.973	107.934	111.928	279.421	315.501	295.108	318.875	140.28	151.779	149.105	177.077	308.474	337.421	330.302	390.289
8799	21682	Tec	25.1082	2.7539	0	11.5306	17.2298	14.9668	26.5162	8.68159	17.9919	19.3313	6.39528	10.8869	22.8389	23.0829	41.0264	36.4614	12.4504	9.52814	14.1605	12.5313	45.6481	37.9923	40.3171	42.3533	22.232	21.0543	18.5095	21.1301	60.1146	56.6143	49.0734	54.9516
97	22070	Tpt1	5611.59	4893.68	2755.84	5348.26	1751.7	1481.71	1697.04	1653.84	7232.75	6564.6	6091.51	6550.79	4737.8	3458.58	3663.66	3111.37	6266.37	6377.18	6281.9	6132.1	6909.11	7137.27	6537.32	7053.4	6788.57	6625.49	6836.87	6629.81	8248.41	8317.78	8320.59	8503.92
4494	13368	Dffb	109.37	55.078	58.5519	38.4352	143.582	172.118	147.312	121.542	71.9677	48.3283	99.1269	51.3239	134.496	173.121	172.311	130.653	50.1476	53.9928	61.362	60.0935	130.028	134.46	130.865	132.66	86.7359	67.2479	81.9218	63.9856	188.588	182.783	188.744	158.896
305	14256	Flt3l	217.238	583.827	1245.2	540.015	206.758	284.369	235.7	269.129	449.798	412.402	492.437	427.699	332.433	319.313	348.724	382.844	9.68366	12.7042	15.1045	13.1009	8.64546	12.2236	14.2101	11.5509	12.8382	18.2261	16.1101	13.9876	9.96184	15.205	10.5697	9.59997
2636	74519	Cyp2j9	17.0136	8.2617	3.90346	3.84352	22.9731	14.9668	5.89249	8.68159	28.7871	25.7751	35.1741	23.329	38.0648	53.86	24.6158	27.346	8.99197	6.35209	6.29354	9.68331	3.45819	5.94662	7.93124	6.65052	17.8482	15.3979	16.7957	18.1541	18.5496	23.9398	15.0995	20.8551
4210	329154	Ankrd44	10.412	11.0156	7.80691	5.76528	34.4597	14.9668	11.785	13.0224	0	4.83283	3.19764	6.22108	10.1506	3.84714	0	3.03845	14.1797	14.6098	16.3632	15.6642	22.1324	18.831	13.5492	17.1513	6.57565	8.48455	11.9969	5.65455	7.90077	5.82319	6.79478	6.95171
3852	22017	Tpmt	26.8478	2.7539	23.4207	15.3741	22.9731	44.9004	23.57	30.3856	35.9838	40.2736	22.3835	32.6606	48.2154	19.2357	20.5132	15.1922	15.9089	24.1379	24.8595	27.6259	24.5531	27.0902	33.7078	35.0027	23.1713	30.4815	25.7077	26.1895	29.1985	26.5279	27.1791	33.1034
5637	101100	Ttll3	21.4658	5.5078	0	7.68705	11.4866	14.9668	14.7312	4.3408	7.19677	4.83283	12.7906	3.11054	5.07531	15.3886	8.20528	9.11534	28.3593	22.5499	28.9503	25.9171	35.9651	31.0546	33.0468	35.7028	34.1307	33.9382	32.5631	26.4871	38.1298	39.7918	51.7158	42.7033
9988	383295	Ypel5	133.697	38.5546	23.4207	49.9658	97.6358	119.735	141.42	99.8383	53.9757	95.0457	83.1387	87.0951	205.55	238.523	164.106	179.268	57.4103	46.0527	54.4391	43.2901	137.982	174.434	158.955	124.26	138.402	127.268	156.988	121.424	268.626	270.778	310.295	276.744
2424	109934	Abr	970.915	272.636	261.532	253.672	769.6	912.976	766.024	642.438	716.078	713.648	617.145	591.002	1712.92	1938.96	1702.59	1546.57	477.266	428.449	430.793	424.642	1040.91	1154.31	1055.85	968.876	879.258	903.762	899.769	824.968	1783.86	1914.54	1823.27	1670.06
5190	105886298	Cmc4	15.005	2.7539	0	3.84352	0	0	8.83873	8.68159	14.3935	8.05472	0	6.22108	22.8389	3.84714	0	6.07689	22.4799	23.8203	29.265	24.4931	24.2073	20.8132	27.4289	23.4518	24.4238	27.0249	25.7077	20.5349	20.9542	19.4106	20.7618	24.8275
220	13498	Atn1	307.677	677.46	1018.8	516.954	430.746	359.204	338.818	325.56	644.111	634.712	796.213	592.557	570.972	792.511	619.498	625.92	27.6676	27.9492	21.398	29.9043	59.4808	29.7331	33.7078	29.7523	34.4439	39.5946	34.9624	42.5579	47.7481	38.1742	52.8483	44.0275
6345	66725	Lrrk2	16.1857	11.0156	3.90346	13.4523	5.74328	14.9668	29.4624	30.3856	17.9919	8.05472	0	3.11054	10.1506	7.69429	16.4106	6.07689	16.9464	20.0091	23.2861	20.221	28.0113	39.6442	27.7593	30.1024	14.7169	14.4552	11.9969	12.7971	17.1756	10.0288	16.987	19.1999
183	13688	Eif4ebp2	313.155	209.296	288.856	228.69	63.1761	112.251	73.6561	65.1119	179.919	165.927	207.847	144.64	154.797	153.886	127.182	173.191	527.414	501.815	485.861	503.817	591.696	445.006	370.124	430.534	411.448	448.424	419.892	491.053	443.817	376.89	467.33	444.247
2374	628308	Zfp970	37.5477	13.7695	7.80691	3.84352	17.2298	0	23.57	17.3632	0	9.66566	6.39528	1.55527	10.1506	7.69429	4.10264	15.1922	67.7857	87.3413	73.0051	85.7258	59.135	67.7254	79.9733	74.5558	45.4033	54.6782	45.5883	52.3789	50.4962	56.6143	60.0206	65.2136
36	270106	Rpl13	15661.7	29097.7	40143.1	29566.3	14249.1	12796.6	11846.8	12983.3	22957.7	21739.7	24043.1	21044.3	15989.8	15430.9	15947	15566	12026.8	12013.1	12251.9	11650.4	13250.7	14008.3	12803.7	13672.4	8932.86	9139.43	8989.8	8572.29	11049.1	11917.2	10944.1	10889.7
8779	76650	Srxn1	890.421	286.406	327.89	242.142	901.695	890.525	674.69	720.572	262.682	215.866	204.649	191.298	568.435	646.32	574.369	701.881	744.605	572.641	662.71	618.023	1991.22	2011.28	1710.17	1833.79	777.805	590.462	641.321	555.633	1982.41	1923.92	1674.54	1903.11
40	319195	Rpl17	12371.2	14058.7	10859.4	14182.6	6122.34	5051.3	4846.57	5178.57	14577	13432	13622	14070.5	9899.39	8371.38	8681.18	8003.27	13713.8	14268.7	13514.7	13122.6	15413.1	16406.1	14851.9	16345.9	13052	12770.5	12768.1	12590.9	15677.2	16047.1	15653.3	16356
2455	19769	Rit1	101.593	60.5858	35.1311	28.8264	114.866	104.768	120.796	104.179	57.5741	59.6049	79.941	38.8817	116.732	123.109	90.258	127.615	69.8607	69.2378	69.5436	73.764	126.224	155.273	129.874	125.66	96.756	82.6458	83.9784	84.8182	187.214	184.077	172.134	175.448
871	71865	Fbxo30	403.219	184.511	109.297	276.734	539.869	553.772	586.303	568.644	233.895	275.471	310.171	320.385	563.359	427.033	557.959	352.46	268.722	273.14	285.097	278.253	542.935	497.204	566.753	509.64	323.459	322.099	335.571	315.464	555.802	519.881	544.715	501.185
1003	56017	Slc2a8	17.8405	35.8007	46.8415	30.7482	0	0	32.4087	13.0224	3.59838	16.1094	25.5811	21.7738	17.7636	19.2357	16.4106	24.3076	13.8338	13.0218	13.8458	10.2529	12.7953	18.1702	14.8711	16.4513	15.0301	15.0836	20.5661	15.178	18.8932	18.7636	12.8346	19.862
2754	16670	Krt32	13.0119	5.5078	15.6138	5.76528	5.74328	7.48341	26.5162	17.3632	21.5903	11.2766	25.5811	6.22108	10.1506	38.4714	12.3079	0	8.30028	10.481	10.0697	9.39851	5.87892	8.58957	9.25311	11.2009	16.2826	16.0264	13.0252	11.3091	14.771	16.499	15.477	17.2137
5595	12142	Prdm1	8.18097	5.5078	3.90346	0	5.74328	7.48341	8.83873	0	32.3854	17.7204	15.9882	15.5527	10.1506	11.5414	12.3079	6.07689	3.8043	2.85844	2.51742	2.27843	1.38327	2.64294	5.28749	1.40011	9.70691	12.8839	14.3963	6.84498	12.7099	5.82319	7.92724	7.94481
1573	212281	Zfp729a	56.4811	13.7695	3.90346	9.60881	28.7164	37.417	14.7312	13.0224	21.5903	20.9423	3.19764	13.9974	10.1506	3.84714	20.5132	18.2307	98.22	111.797	112.654	100.82	77.1175	92.503	88.896	85.7567	95.8166	88.9307	99.0602	101.484	83.8169	89.2889	100.412	90.7032
1301	329934	Foxo6	21.4708	24.7851	109.297	40.357	28.7164	22.4502	14.7312	17.3632	17.9919	19.3313	28.7788	9.33161	10.1506	19.2357	8.20528	18.2307	20.7507	17.4683	22.3421	27.6259	21.4408	28.0813	12.8883	27.6522	8.14128	16.6549	11.9969	15.4756	13.397	9.05829	12.0796	11.5862
615	219150	Hmbox1	55.8612	38.5546	39.0346	51.8876	17.2298	14.9668	29.4624	13.0224	35.9838	51.5502	35.1741	43.5475	58.366	61.5543	49.2317	69.8843	54.6435	46.3703	57.9006	54.6822	87.1463	62.1092	59.1538	68.2553	75.4634	75.104	80.5507	80.9493	79.0077	77.319	78.5175	85.0756
9259	18128	Notch1	2922.76	1971.79	3075.92	1725.74	6673.69	6301.03	5589.03	5903.48	2018.69	2060.4	2088.06	1833.66	5813.77	6620.93	5702.67	6681.54	943.466	881.67	787.637	865.802	2603.67	2348.26	2204.55	2116.62	937.499	959.383	871.319	802.35	2674.24	2583.55	2517.84	2447.33
1656	242585	Slc35d1	157.433	148.711	105.393	119.149	356.084	374.17	347.657	295.174	154.73	149.818	147.092	169.524	296.906	276.994	283.082	309.922	66.4023	53.04	62.6207	66.0743	150.085	98.78	104.428	114.459	49.1608	55.6209	60.3273	71.7234	95.1528	95.7591	108.716	93.6825
904	100039123	Gm14295	301.842	24.7851	3.90346	11.5306	34.4597	22.4502	14.7312	52.0896	14.3935	14.4985	12.7906	17.108	12.6883	11.5414	4.10264	27.346	573.065	704.129	719.666	704.318	521.84	511.079	510.904	517.34	481.901	533.584	511.411	620.512	486.069	565.82	533.768	583.281
5740	21912	Tspan7	86.6547	11.0156	0	7.68705	5.74328	22.4502	5.89249	30.3856	212.305	231.976	163.08	203.74	243.615	280.841	221.542	221.807	1.72923	2.22323	1.25871	5.41126	4.84146	4.29478	2.97421	2.10016	97.0691	90.5019	100.089	87.7943	103.054	111.611	105.319	103.945
4610	20530	Slc31a2	65.2053	16.5234	11.7104	23.0611	51.6895	22.4502	61.8711	47.7488	43.1806	75.7144	70.3481	43.5475	71.0543	107.72	57.4369	109.384	32.8553	42.559	34.2998	47.8469	68.8179	79.6187	74.6858	78.4061	84.544	77.6179	83.2929	81.2469	100.649	97.7002	104.942	118.841
62	54217	Rpl36	4471.7	8716.1	12651.1	8657.53	4330.44	3868.92	3420.59	3611.54	7139.19	7207.36	7875.79	7112.25	5471.18	5493.72	5284.2	5566.43	2753.97	2620.56	2797.79	2431.08	2785.57	2823.99	2705.54	2953.88	2388.53	2282.34	2422.01	2092.78	2748.78	2900.92	2816.06	2692.63
1309	14013	Mecom	17.039	27.539	7.80691	7.68705	28.7164	29.9336	23.57	39.0672	0	0	0	1.55527	2.53765	3.84714	0	0	48.0725	49.5463	49.4043	37.3092	40.115	36.6709	39.6562	39.5531	1.87876	0	1.37108	2.67847	3.77863	1.61755	2.64241	1.65517
5357	12955	Cryab	929.289	313.945	503.546	322.856	781.087	1294.63	969.314	1041.79	755.66	887.63	770.632	615.887	2106.25	4093.36	3167.24	4363.21	136.609	138.476	149.472	119.617	243.802	379.923	286.186	283.872	293.712	282.19	294.096	233.622	811.718	1207.66	844.063	1115.91
53	54127	Rps28	4105.72	6251.35	5816.15	6470.57	2739.55	2185.15	2133.08	2157.38	6164.03	5512.65	6350.52	5692.28	4773.33	3954.86	3712.89	3466.87	3793.58	3910.03	3789.97	3474.88	3759.05	3998.11	3577.32	4015.86	3357.96	3281.01	3495.9	3264.46	3885.81	3920.95	4093.86	4277.95
1354	14388	Gab1	80.1622	44.0624	42.938	23.0611	57.4328	29.9336	35.3549	21.704	172.722	114.377	134.301	101.092	124.345	203.899	131.284	136.73	25.9384	21.2795	22.6567	25.9171	50.4895	47.2426	47.9179	51.454	94.8772	87.0452	88.7772	74.9971	117.481	108.053	126.836	120.827
141	17776	Mast2	450.654	195.527	249.821	182.567	63.1761	104.768	85.4411	65.1119	179.919	157.872	201.451	146.195	152.259	180.816	147.695	203.576	716.245	648.231	677.185	655.617	770.138	703.023	709.846	697.254	689.817	661.795	727.356	671.998	886.948	784.513	865.58	788.522
515	214742	Rcor3	68.0682	71.6014	89.7795	55.7311	17.2298	7.48341	26.5162	30.3856	50.3774	66.0487	67.1505	82.4293	50.7531	46.1657	45.129	39.4998	94.0699	80.0364	88.1096	82.3081	80.9215	80.9402	76.3382	72.1056	98.3216	102.443	100.774	99.401	80.7253	70.8488	82.6698	73.8205
9583	105785	Kdelr3	79.4001	55.078	19.5173	36.5135	57.4328	112.251	123.742	104.179	61.1725	49.9393	47.9646	62.2108	159.872	126.956	184.619	176.23	28.0135	29.5372	26.1182	30.4739	56.0226	76.9758	77.66	84.7066	43.8377	43.994	60.6701	56.2478	95.8398	121.963	113.624	138.041
3775	12521	Cd82	18.9782	5.5078	11.7104	5.76528	5.74328	0	14.7312	30.3856	53.9757	57.994	35.1741	40.437	48.2154	50.0129	53.3343	36.4614	1.72923	2.54084	2.83209	5.12646	2.42073	3.63405	2.64375	3.50027	17.2219	14.4552	16.4529	10.4163	12.7099	16.1755	15.0995	11.9172
416	13424	Dync1h1	800.292	426.855	530.87	445.849	884.466	1249.73	1240.37	1493.23	492.978	504.225	447.67	440.141	728.307	880.996	635.909	744.419	624.251	639.338	617.711	591.821	1080.34	1113.34	1201.91	1211.79	685.12	720.244	684.51	702.354	951.528	966.649	928.998	943.115
2870	212712	Satb2	22.1975	16.5234	23.4207	7.68705	34.4597	22.4502	23.57	39.0672	28.7871	24.1642	22.3835	21.7738	22.8389	19.2357	20.5132	36.4614	18.6756	15.8802	16.3632	21.3602	30.0862	13.8755	15.8625	18.5514	20.6663	25.7679	18.5095	21.7254	19.9237	19.4106	27.9341	20.193
5916	242125	Mab21l3	50.7782	19.2773	23.4207	26.9047	63.1761	37.417	61.8711	78.1343	25.1887	49.9393	28.7788	49.7686	60.9037	103.873	114.874	75.9612	17.9839	18.7387	14.7898	18.2274	57.4059	58.1448	61.1366	58.1045	39.767	38.0234	32.2203	26.7847	75.5726	82.4952	69.8352	85.4067
5	19896	Rpl10a	7399.05	10977	10839.9	10519.7	5611.19	5605.07	4902.55	5195.93	9819.99	9388.58	9800.77	9801.31	7978.38	7263.41	7171.41	6529.62	6101.75	6227.59	6166.1	5988.84	8016.77	8713.46	7828.79	8185.39	5379.82	5550.78	5582.34	5268.25	7144.36	7341.1	7077.9	7392.31
7102	230903	Fbxo44	10.5263	11.0156	3.90346	0	11.4866	14.9668	5.89249	8.68159	14.3935	4.83283	0	6.22108	15.2259	7.69429	8.20528	18.2307	7.60859	8.25772	10.699	9.39851	12.1037	12.8844	15.2015	10.5008	12.8382	9.74152	10.2831	9.82105	12.3664	18.4401	21.5168	13.9034
7302	74646	Spsb1	134.455	77.1092	81.9726	67.2616	229.731	194.569	153.205	221.381	39.5822	67.6596	67.1505	55.9897	205.55	276.994	262.569	328.152	65.0189	58.1216	53.8098	51.5494	134.178	142.719	123.265	141.411	68.2615	54.9925	61.3557	48.8077	201.641	204.782	193.274	236.027
3057	22690	Zfp28	13.8813	2.7539	3.90346	5.76528	5.74328	0	17.6775	4.3408	17.9919	20.9423	6.39528	7.77634	17.7636	15.3886	4.10264	12.1538	11.067	14.2922	12.9018	13.6706	9.3371	7.2681	12.2273	10.1508	30.3732	31.4243	26.3932	29.1656	18.8932	19.4106	21.5168	19.531
35	19981	Rpl37a	6800.95	11219.4	13100	10300.6	5065.58	4617.26	3741.73	4488.38	10028.7	9693.05	9800.77	8921.02	7105.43	6874.84	7232.95	7362.16	5480.95	5678.45	5589.29	5305.31	5692.17	5943.32	5544.6	5883.61	5364.16	5120.9	5363.31	4806.07	6176.69	6535.56	6300.27	6492.89
10025	234593	Ndrg4	54.8133	16.5234	27.3242	26.9047	68.9194	97.2843	58.9249	39.0672	50.3774	43.4955	73.5458	55.9897	109.119	111.567	160.003	164.076	9.33782	10.1633	16.9926	7.97449	30.0862	25.4383	28.4203	30.8024	31.3126	32.6812	39.7612	27.9751	73.855	82.4952	76.63	72.1653
667	19386	Ranbp2	1595.73	892.264	491.836	857.106	1585.15	1751.12	2407.08	2074.9	924.784	945.624	882.549	1007.81	1535.28	1319.57	1460.54	1425.03	1399.64	1417.79	1343.67	1451.93	2460.15	2407.06	2724.05	2508.65	1517.41	1368.21	1461.91	1576.73	2032.56	2072.08	2102.23	2063
4277	231070	Insig1	306.933	66.0936	101.49	80.714	281.421	217.019	176.775	195.336	133.14	165.927	147.092	132.198	317.207	357.784	361.032	331.191	166.697	183.893	193.212	204.489	376.942	374.968	441.836	407.432	317.51	331.526	359.222	338.678	633.436	701.371	741.009	678.288
30	67097	Rps10	6998.6	12841.4	15672.4	11976.4	6208.49	5358.12	4961.48	5738.53	11511.2	10960.9	11434.8	10648.9	7618.04	7282.64	7692.45	7772.35	4831.46	4763.12	4902.04	4502.45	5171.03	5479.48	5009.57	5537.08	4431.05	4365.14	4439.2	4087.05	5303.82	5506.8	5498.49	5450.8
4556	228765	Sdcbp2	21.8227	11.0156	11.7104	9.60881	34.4597	22.4502	20.6237	13.0224	50.3774	40.2736	44.767	31.1054	40.6025	15.3886	16.4106	33.4229	9.33782	8.25772	11.643	13.3858	13.8327	14.8666	15.2015	7.35057	34.757	21.0543	23.9938	17.5589	22.3283	27.4984	20.0069	20.193
7064	104175	Sbk1	43.6557	8.2617	35.1311	3.84352	51.6895	37.417	26.5162	21.704	7.19677	3.22189	0	9.33161	10.1506	26.93	24.6158	12.1538	66.0564	57.1688	70.8023	60.0935	128.645	142.719	131.526	123.56	23.4845	27.6533	25.3649	30.356	51.8703	46.5855	44.9211	44.3585
885	50493	Txnrd1	4646.33	2552.87	2552.86	2759.65	7087.21	6959.57	6652.62	6567.62	2367.74	2029.79	2241.55	2122.94	5806.15	5601.44	4906.75	5326.4	3373.03	3368.2	3336.21	3169.01	7723.17	7326.24	7179.09	7110.81	2635.9	2515.83	2511.13	2500.8	6780.24	6448.86	6123.23	6399.21
5811	12161	Bmp6	5.58189	8.2617	7.80691	0	11.4866	0	8.83873	13.0224	3.59838	1.61094	0	6.22108	5.07531	11.5414	4.10264	0	9.33782	6.03449	7.55225	6.26567	9.3371	8.91994	5.94843	9.45074	5.01002	4.08515	4.456	3.8689	3.43512	3.2351	1.88744	2.64827
5759	208285	Cyp4f17	55.0144	24.7851	27.3242	28.8264	97.6358	67.3507	53.0324	73.7935	82.7628	53.1611	63.9528	65.3213	98.9685	134.65	98.4633	112.423	15.563	21.2795	13.2164	19.0818	33.5444	37.3316	37.3429	31.1524	41.9589	47.7649	37.3618	30.6536	61.1451	67.6137	55.4907	72.4964
3442	66917	Chordc1	1356.41	815.155	495.739	882.088	1544.94	2147.74	1688.2	2222.49	640.512	673.375	655.516	749.64	1461.69	1450.37	1222.59	1546.57	1073.5	1156.4	1068.64	1197.31	2198.02	2499.23	2086.25	2540.5	788.138	793.148	748.608	940.143	1466.11	1822.01	1475.98	1998.12
37	76846	Rps9	10072.5	14898.6	18104.2	14038.5	7730.46	6944.6	6246.04	6450.42	15192.4	14371.2	14865.8	13081.4	11038.8	10933.6	10945.8	10184.9	7963.78	7804.18	7993.74	7348.49	8949.44	9278.06	8771.29	9481.54	7944.32	7980.51	7996.8	7192.58	9160.09	9857.04	9613.86	9884.33
4465	70152	Mettl7a1	53.0426	46.8163	11.7104	19.2176	103.379	29.9336	94.2798	21.704	21.5903	28.997	44.767	21.7738	63.4414	57.7071	61.5396	45.5767	39.0805	38.7478	44.3695	43.2901	78.155	81.9313	70.0593	74.2058	30.6864	38.9661	35.648	37.201	79.0077	95.4356	81.1599	103.945
6460	22433	Xbp1	574.009	212.05	281.049	201.785	603.045	471.455	571.571	642.438	313.059	457.508	390.112	561.452	555.746	757.887	717.962	868.996	302.615	345.236	320.341	417.806	702.703	748.944	748.18	872.268	485.972	533.584	471.65	688.069	776.337	952.091	823.301	999.059
9693	12585	Cdr2	485.993	134.941	121.007	132.602	304.394	396.621	329.979	299.515	129.542	133.708	182.266	163.303	246.152	250.064	365.135	470.959	375.934	390.018	405.933	438.597	993.883	997.711	938.199	1067.93	387.024	438.683	422.977	468.137	917.864	1027.15	955.422	1180.13
798	83767	Wasf1	30.6269	35.8007	54.6484	76.8705	17.2298	44.9004	29.4624	39.0672	100.755	66.0487	89.534	69.9871	53.2907	46.1657	53.3343	48.6151	7.60859	3.81125	6.29354	5.41126	8.99128	8.91994	5.94843	10.1508	8.4544	10.6842	6.16984	10.7139	7.90077	4.85266	7.54976	10.262
707	15357	Hmgcr	1096.07	655.428	480.125	666.851	1361.16	1481.71	1649.9	1601.75	949.973	1180.82	1339.81	1326.64	1778.9	1819.7	1924.14	1968.91	459.628	483.394	499.707	518.342	817.515	849.046	982.152	922.322	721.129	731.243	782.542	834.492	1183.74	1261.69	1359.33	1386.04
7582	108767	Pnrc1	471.438	250.605	359.118	213.316	729.397	770.791	677.636	533.918	521.766	423.678	543.599	340.604	918.631	927.161	795.912	647.189	211.657	158.802	184.401	162.053	441.265	448.309	407.798	353.178	419.589	382.747	401.04	308.024	557.52	537.027	533.013	454.84
2404	74238	Mterf2	15.4899	0	3.90346	15.3741	0	14.9668	17.6775	26.0448	17.9919	20.9423	28.7788	23.329	10.1506	15.3886	20.5132	12.1538	15.2172	14.2922	17.9366	14.525	13.4869	14.5362	12.5578	10.1508	15.0301	20.74	19.8806	14.5828	16.8321	18.4401	18.8744	15.8896
84	18263	Odc1	5442.08	2390.39	1869.76	2392.59	643.248	561.256	633.443	603.371	2983.06	2321.37	2730.79	2639.29	1918.47	1535.01	1513.87	1288.3	9927.49	10516.5	9890.3	9848.21	7659.54	7907.69	6854.57	7155.26	10446.5	9614.88	9361.36	9390.41	9518.71	8053.47	8287.75	8247.7
5021	54194	Akap8l	73.2957	55.078	50.7449	46.1223	103.379	164.635	117.85	125.883	75.566	45.1064	38.3717	32.6606	93.8932	111.567	98.4633	88.1149	40.118	50.8167	46.5722	40.1573	89.9128	93.1638	82.9475	90.3071	31.9389	42.1085	48.3304	44.3435	72.481	83.7892	82.6698	85.0756
7920	71982	Snx10	43.9649	8.2617	19.5173	5.76528	40.203	29.9336	14.7312	21.704	17.9919	37.0517	25.5811	31.1054	65.979	80.79	69.7448	75.9612	18.6756	24.1379	18.8806	17.0882	46.6855	43.2782	34.6992	37.1029	46.6558	51.2215	49.016	42.2603	101.336	109.347	78.895	99.3101
42	14109	Fau	9113.12	15666.9	19782.7	15187.7	7494.98	7296.32	6036.86	6823.73	14368.3	13477.2	14651.6	13022.3	9739.52	9664.02	9817.61	9367.53	6901.34	6965.39	6880.41	6372.47	7253.89	7616.97	6986.43	7705.5	6225.57	6157.9	6105.74	5562.29	7166.69	7425.54	7348.56	7434.68
32	67115	Rpl14	6030.21	3456.15	3013.47	3680.17	1470.28	1616.42	1219.75	1554.01	3771.11	3727.72	3686.88	3598.89	2811.72	2269.81	2252.35	2339.6	8490.15	8997.74	8550.09	8575.99	9871.74	10032	9259.39	9828.07	8180.73	8181.62	8022.85	8042.85	9666.42	10228.4	10001.2	10539.1
2592	74018	Als2	263.432	99.1404	97.5864	121.071	333.11	217.019	244.538	277.811	133.14	157.872	137.499	160.193	276.604	265.453	320.006	352.46	160.818	188.022	170.24	170.882	344.089	339.288	347.322	311.524	245.178	269.306	247.136	265.466	495.344	466.826	482.052	469.406
8463	224624	Rab40c	159.089	140.449	132.718	113.384	321.624	441.521	279.893	256.107	100.755	114.377	153.487	115.09	236.002	296.23	168.208	224.845	60.8688	64.4737	71.117	61.8023	159.422	179.72	147.719	177.464	76.4028	85.474	78.1513	69.3426	144.618	159.814	143.445	157.241
3431	83813	Tnk1	202.136	195.527	226.4	184.489	419.26	561.256	462.56	512.214	187.116	198.146	191.858	195.964	327.357	465.504	414.366	492.228	49.8017	41.2886	42.1667	47.5621	89.2212	98.78	84.5999	93.8073	58.8677	60.3346	62.0412	55.0574	120.916	112.582	100.412	114.538
193	116870	Mta1	193.07	264.374	425.477	236.377	132.096	104.768	73.6561	117.202	212.305	132.097	195.056	135.308	93.8932	73.0957	98.4633	112.423	310.223	292.514	298.943	282.24	289.104	287.751	236.615	262.52	176.29	175.033	165.215	159.22	189.962	150.756	163.83	138.372
3076	13136	Cd55	107.801	30.2929	35.1311	30.7482	74.6627	127.218	61.8711	69.4527	122.345	91.8238	102.325	87.0951	116.732	157.733	90.258	112.423	63.2897	50.4991	58.2152	50.4102	92.3336	94.1549	79.6429	98.0077	194.451	161.835	161.444	141.364	204.39	197.665	183.082	200.937
3046	214897	Csnk1g1	368.809	112.91	85.876	140.289	241.218	344.237	285.786	290.833	151.132	106.322	127.906	136.864	236.002	223.134	201.029	176.23	378.7	391.289	387.682	371.099	812.674	731.435	737.605	731.207	392.66	373.006	368.477	406.532	602.176	616.287	599.828	672.66
2803	52118	Pvr	94.0181	49.5702	62.4553	48.044	132.096	119.735	117.85	134.565	129.542	122.432	89.534	105.758	129.42	169.274	143.592	154.961	50.4934	38.1125	38.3906	35.3156	84.7256	64.4218	66.7546	61.9548	89.8672	90.5019	91.8621	93.4488	102.023	90.5829	105.319	101.958
6905	56527	Mast1	51.9558	49.5702	39.0346	46.1223	114.866	119.735	103.119	108.52	46.779	56.383	38.3717	34.2159	86.2802	123.109	118.976	106.346	17.2923	9.52814	15.4192	11.3921	35.2735	37.9923	38.6648	36.7529	15.0301	14.7694	20.9089	15.7732	30.9161	34.9391	44.1661	40.3861
6723	52850	Sgsm1	39.1774	8.2617	7.80691	15.3741	17.2298	29.9336	17.6775	30.3856	32.3854	22.5532	28.7788	18.6632	35.5272	26.93	65.6422	30.3845	20.4049	16.833	21.7127	21.3602	28.7029	30.7242	29.0812	34.3027	63.2515	61.2773	58.6135	59.8191	90.6871	100.612	87.9547	101.627
3555	105348	Golm1	30.8044	11.0156	0	21.1394	22.9731	14.9668	35.3549	21.704	7.19677	40.2736	44.767	26.4396	22.8389	38.4714	36.9237	33.4229	26.6301	25.0908	24.2301	27.6259	26.2822	32.7064	29.7421	30.8024	37.5751	30.7958	38.7329	46.1292	46.3741	56.9378	44.1661	53.6274
7243	58233	Dnaja4	71.3098	35.8007	35.1311	51.8876	80.406	112.251	79.5486	138.905	10.7951	24.1642	35.1741	32.6606	83.7426	126.956	106.669	167.115	40.8097	36.8421	32.7264	28.7651	84.7256	104.727	75.0163	129.86	28.8076	35.1952	30.8492	29.7608	81.4123	109.347	90.5971	149.958
205	269878	Megf8	189.979	132.187	179.559	113.384	80.406	82.3175	50.0862	56.4304	140.337	88.6019	121.51	121.311	83.7426	126.956	82.0528	97.2303	236.558	229.311	219.015	196.514	287.375	266.277	263.053	263.221	298.096	299.473	300.608	272.013	332.863	294.071	296.705	278.068
3769	27981	Rsrp1	195.544	88.1248	144.428	82.6357	195.272	254.436	259.27	234.403	89.9596	80.5472	63.9528	111.979	116.732	200.051	155.9	194.461	136.609	138.158	137.514	137.275	292.563	261.651	256.774	257.97	174.724	184.775	220.4	199.992	332.863	332.569	338.229	387.64
9340	21354	Tap1	136.495	123.926	187.366	107.619	402.03	291.853	321.141	269.129	115.148	111.155	108.72	65.3213	187.786	238.523	233.85	276.499	40.4639	53.04	50.3483	49.271	114.12	129.504	109.385	123.56	38.8276	38.6518	38.0474	33.0344	94.1222	94.4651	75.8751	108.579
5798	16580	Kifc5b	76.7134	38.5546	74.1657	36.5135	114.866	104.768	88.3873	138.905	61.1725	45.1064	35.1741	32.6606	58.366	76.9429	73.8475	94.1918	56.3728	56.216	63.5648	50.9798	108.587	106.709	118.969	119.009	60.4333	66.9337	69.2393	59.8191	97.2138	80.8776	93.2395	96.3308
4403	380712	Tlcd2	16.3024	13.7695	7.80691	11.5306	11.4866	14.9668	32.4087	21.704	14.3935	3.22189	9.59292	9.33161	17.7636	23.0829	8.20528	15.1922	14.1797	13.9746	21.0834	19.0818	19.7117	21.4739	23.4632	16.8013	17.5351	14.4552	11.9969	13.69	23.7023	24.9103	19.6294	15.2275
7356	665700	Hmcn2	9.21021	2.7539	3.90346	7.68705	5.74328	14.9668	5.89249	17.3632	0	12.8876	3.19764	10.8869	12.6883	7.69429	4.10264	6.07689	9.68366	7.30491	9.44031	2.84803	6.57055	9.91104	11.5664	12.251	11.5857	13.1982	12.3397	8.92823	15.458	12.9404	14.722	10.9241
17	16898	Rps2	22087.7	11676.5	13291.3	12268.5	5140.24	4722.03	4593.2	5065.71	12259.7	11218.6	11649	10560.3	8927.47	7678.9	8307.84	7289.23	33769.7	34510	34219.6	33768.8	34802.1	37100.7	32460.2	35642.9	30508.5	31464.2	32257	30247.1	37055	37870.1	36603.5	37790.8
4826	17436	Me1	312.56	173.496	156.138	171.037	396.287	478.938	385.958	377.649	212.305	280.304	297.381	306.388	583.66	607.849	582.575	616.805	145.255	150.227	153.877	152.939	331.294	319.136	295.108	327.626	201.966	186.032	194.35	197.909	363.779	342.274	349.931	350.896
2391	70227	Zfp619	15.1122	0	3.90346	17.2959	5.74328	29.9336	14.7312	21.704	3.59838	8.05472	6.39528	15.5527	25.3765	0	4.10264	12.1538	22.1341	24.1379	19.8247	18.797	19.7117	16.188	18.5062	14.7011	23.7976	22.3112	14.0535	19.0469	19.2367	16.8225	12.4571	18.2068
2075	52696	Zwint	1826.29	1027.2	780.691	1149.21	2354.75	2312.37	2463.06	2417.82	1259.43	1214.65	1298.24	1314.2	2971.59	2846.89	2584.66	2628.26	1061.74	1051.59	1105.15	989.406	2179.35	2203.55	2238.26	2097.71	1249.69	1191.92	1274.07	1178.82	2613.09	2571.58	2579	2406.95
2774	58251	Cep295nl	19.0585	8.2617	15.6138	19.2176	17.2298	22.4502	44.1937	21.704	28.7871	12.8876	22.3835	17.108	32.9895	19.2357	28.7185	21.2691	11.067	11.4338	13.5311	13.1009	7.95383	15.1969	14.8711	12.251	16.9088	19.1688	16.1101	13.3923	28.855	18.4401	22.6493	23.8344
44	16785	Rpsa	20041.3	14758.2	19423.6	14232.6	7230.79	6824.87	6142.92	6880.16	13950.9	13821.9	13957.7	12874.5	11460	11491.4	12332.5	12506.2	26823.8	27233.3	27111	25726	28862.4	30796.2	27743.8	29469.5	25763.1	26213.5	25881.5	23617.8	29365.1	30679.8	28387.5	29716.6
719	29875	Iqgap1	2368.47	1445.8	1038.32	1241.46	2710.83	2926.01	3220.25	2951.74	2223.8	2211.83	2500.56	2449.55	2882.77	2843.04	2994.93	2819.68	1560.8	1479.72	1403.77	1417.47	2639.29	2699.11	2996.69	2792.52	2271.1	2091.91	2200.92	2321.34	2810.27	2651.49	2864.38	2761.15
15	75705	Eif4b	5112.68	5441.71	6631.97	5163.77	3101.37	3090.65	2813.66	2860.58	3925.84	3827.6	3651.71	3790.19	2908.15	2958.45	3019.54	2944.25	6848.43	6953	6606.01	6631.36	9264.13	9382.78	8848.95	8873.19	4551.29	4637.28	4388.47	4896.84	4949.66	5330.48	4948.87	5252.84
3882	207839	Galnt6	209.122	187.265	253.725	186.411	442.233	613.639	438.99	477.488	46.779	51.5502	67.1505	41.9923	86.2802	73.0957	49.2317	72.9227	258.346	215.336	230.029	224.71	482.417	495.882	433.574	449.435	62.9383	58.4491	50.7298	47.9148	108.206	90.9064	95.1269	90.0411
4035	68947	Chst8	7.67056	2.7539	3.90346	3.84352	5.74328	22.4502	5.89249	0	10.7951	14.4985	9.59292	13.9974	12.6883	3.84714	12.3079	6.07689	3.8043	2.22323	4.72015	5.69606	3.45819	2.64294	2.31328	3.8503	11.5857	17.2833	10.9686	9.52344	6.52672	8.41127	9.4372	6.95171
2797	12231	Btn1a1	9.38993	2.7539	15.6138	5.76528	34.4597	14.9668	2.94624	13.0224	7.19677	14.4985	19.1858	12.4422	7.61296	3.84714	4.10264	9.11534	10.3754	6.03449	7.23757	7.12008	5.18728	7.59846	5.28749	5.95046	9.08066	11.627	8.91199	8.92823	6.18321	9.05829	6.03981	8.93791
34	66481	Rps21	7216.89	11255.2	12007	12658.6	5668.62	4781.9	4230.81	4744.49	12105	12306	12589.1	11939.8	10046.6	9194.67	8590.92	8370.92	4749.84	4850.14	5082.98	4881.24	5069.7	5501.62	4846.65	5066.65	5015.03	4903.44	4862.86	4502.21	5851.04	6301.66	5754.42	5994.36
1269	382793	Mtx3	41.4054	19.2773	7.80691	17.2959	34.4597	22.4502	23.57	43.408	7.19677	8.05472	9.59292	20.2185	12.6883	11.5414	8.20528	15.1922	76.7776	77.8131	92.2004	89.4282	60.5183	65.4129	69.3983	76.656	42.5851	50.2788	61.3557	56.2478	41.9084	49.4971	50.9609	61.5723
377	66680	Oser1	520.398	346.991	230.304	319.012	815.546	568.739	715.937	755.299	471.388	418.845	342.148	404.37	611.575	530.906	668.73	562.113	385.272	399.547	427.017	390.465	654.635	626.047	635.49	647.901	471.568	421.085	455.54	405.937	646.833	606.906	630.782	565.405
5623	27362	Dnajb9	76.4615	24.7851	19.5173	46.1223	114.866	37.417	67.7636	86.8159	43.1806	56.383	63.9528	40.437	114.194	150.039	94.3607	118.499	44.614	54.9456	37.7612	51.5494	94.0627	88.2083	87.2436	82.2564	52.6052	60.0203	56.5569	72.6163	112.672	127.14	117.776	151.944
3728	71063	Zfp597	73.6778	13.7695	0	5.76528	28.7164	14.9668	5.89249	13.0224	0	14.4985	15.9882	13.9974	17.7636	30.7771	0	6.07689	105.483	111.479	112.34	120.187	113.774	98.1193	120.951	108.858	140.594	142.352	139.507	146.423	150.115	142.021	166.85	183.724
7596	56312	Nupr1	104.683	63.3397	128.814	57.6528	120.609	187.085	188.56	234.403	21.5903	20.9423	22.3835	34.2159	48.2154	73.0957	49.2317	33.4229	112.746	97.8222	111.081	71.4856	206.8	300.635	261.07	271.971	43.8377	54.9925	53.1292	52.3789	63.5497	102.553	69.8352	87.7239
2951	107817	Jmjd6	695.238	440.624	569.905	397.805	1079.74	1272.18	948.691	1076.52	385.027	431.733	412.496	399.704	812.049	931.009	873.862	984.457	441.298	470.69	455.652	447.141	894.633	973.925	838.398	926.172	421.155	450.624	412.351	466.054	783.894	867.979	766.678	919.942
5644	20618	Sncg	7.61378	2.7539	0	1.92176	5.74328	7.48341	2.94624	0	0	16.1094	12.7906	6.22108	15.2259	15.3886	20.5132	6.07689	5.87937	4.44646	4.0908	4.84165	3.804	2.97331	3.96562	4.20033	10.3332	9.11304	11.9969	9.52344	10.6489	12.9404	10.1922	13.9034
819	73689	Bloc1s2	346.234	223.066	121.007	267.125	482.436	486.421	533.27	507.873	205.108	227.143	198.254	245.733	441.552	446.269	463.598	364.614	248.663	276.634	266.846	258.886	456.481	453.265	427.295	466.236	222.006	204.886	219.029	232.729	439.695	472.649	429.581	444.909
9399	22187	Ubb	3344.53	1696.4	2045.41	1754.57	3566.58	4849.25	3862.53	4783.56	1831.58	1796.2	1665.97	1429.29	3344.63	5182.1	4722.14	5350.7	2251.11	2163.84	2190.15	2049.16	4470.05	5199.66	4870.11	5221.01	2109.84	1869.11	1808.79	1746.06	4499.32	5434.33	4624.6	5292.23
2809	100039968	Tmem35b	8.49149	13.7695	0	1.92176	11.4866	14.9668	8.83873	8.68159	17.9919	14.4985	15.9882	4.66581	12.6883	7.69429	12.3079	6.07689	6.22521	8.25772	8.49628	7.40488	2.76655	5.28589	6.2789	6.65052	10.9594	9.11304	7.54092	6.54737	6.87024	6.79372	7.17227	5.29654
2980	107527	Il1rl2	33.5273	2.7539	3.90346	7.68705	0	7.48341	11.785	17.3632	71.9677	54.7721	63.9528	43.5475	20.3012	46.1657	41.0264	51.6536	14.5255	14.2922	15.1045	14.525	14.5244	8.58957	10.2445	10.5008	74.8371	66.6194	74.7236	65.1761	50.4962	52.0852	55.1132	53.6274
4463	18415	Hspa4l	1065.33	553.534	402.056	766.783	1223.32	1788.53	1293.4	1198.06	449.798	587.995	578.773	605	959.233	1077.2	972.325	1245.76	867.38	841.652	896.2	899.409	1594.57	1840.81	1686.71	1788.99	773.108	812.631	805.85	744.912	1262.06	1489.44	1341.59	1678.01
4628	71233	Enkur	7.45863	5.5078	3.90346	1.92176	5.74328	7.48341	5.89249	8.68159	10.7951	11.2766	12.7906	3.11054	17.7636	11.5414	20.5132	9.11534	3.11261	2.22323	3.77612	3.70244	3.45819	1.32147	2.97421	2.80022	9.70691	8.48455	10.9686	9.82105	6.52672	9.05829	8.30473	8.93791
5592	320040	Rnf222	11.8807	2.7539	3.90346	0	0	7.48341	2.94624	4.3408	21.5903	14.4985	15.9882	7.77634	7.61296	15.3886	16.4106	3.03845	6.9169	5.39928	4.0908	1.42402	3.11237	3.63405	3.30468	3.15025	34.4439	35.8237	38.3901	30.9512	22.3283	20.7047	14.3445	16.5517
4281	78779	Spata2l	9.09393	5.5078	11.7104	9.60881	0	22.4502	20.6237	21.704	14.3935	9.66566	6.39528	6.22108	10.1506	3.84714	16.4106	15.1922	6.57106	4.12886	4.40548	3.98724	3.45819	3.96442	6.60937	5.60044	5.63627	6.59909	8.22646	6.24976	10.6489	8.08776	10.9471	12.9103
2665	72371	2210408I21Rik	16.691	22.0312	3.90346	9.60881	5.74328	29.9336	29.4624	26.0448	10.7951	27.386	15.9882	20.2185	20.3012	7.69429	16.4106	27.346	17.6381	17.1506	14.4751	14.525	18.6742	11.5629	16.5234	13.301	14.7169	10.6842	14.0535	17.2612	13.7405	15.205	21.1393	13.9034
8339	116701	Fgfrl1	9.10157	0	3.90346	5.76528	0	0	11.785	8.68159	3.59838	16.1094	0	4.66581	0	11.5414	8.20528	0	11.067	13.3394	10.3843	11.1073	13.4869	20.1524	14.2101	20.6516	5.9494	11.3127	9.25476	9.22584	16.1451	15.205	15.477	10.9241
8879	382018	Unc13a	9.50292	2.7539	3.90346	0	0	0	2.94624	8.68159	14.3935	6.44378	19.1858	12.4422	10.1506	3.84714	16.4106	0	8.64613	7.94011	5.34951	9.1137	12.7953	13.2147	10.575	9.80077	12.2119	19.7973	9.9403	10.1187	15.1145	16.1755	17.7419	14.8965
6711	11604	Agrp	9.87417	8.2617	11.7104	0	0	14.9668	8.83873	17.3632	0	0	15.9882	3.11054	10.1506	3.84714	4.10264	9.11534	9.68366	11.4338	10.3843	10.8225	12.7953	14.2058	15.8625	11.5509	13.7775	11.3127	10.6258	7.44019	18.2061	14.2345	14.722	11.5862
4811	78938	Fbxo34	109.925	57.8319	50.7449	59.5746	74.6627	149.668	173.828	108.52	61.1725	82.1581	92.7316	51.3239	147.184	161.58	114.874	130.653	75.7401	71.461	81.816	78.0361	152.506	142.058	145.737	141.411	107.089	87.9879	88.0916	82.4373	166.947	149.138	160.81	159.889
9550	26404	Map3k12	35.5219	16.5234	23.4207	11.5306	34.4597	67.3507	29.4624	30.3856	39.5822	25.7751	19.1858	37.3265	43.1401	76.9429	45.129	57.7305	19.7132	15.8802	16.0485	19.3666	38.3859	40.9656	37.6734	40.2531	23.1713	23.8824	28.1071	31.5464	52.9008	46.5855	49.8284	58.924
5490	11636	Ak1	261.112	79.8631	78.0691	63.4181	166.555	172.118	153.205	182.313	183.518	165.927	198.254	163.303	522.757	473.199	496.419	507.421	101.678	88.9293	98.1792	94.8395	251.41	274.866	249.834	261.12	218.875	204.572	193.665	172.91	567.825	583.936	524.331	601.157
1546	15366	Hmmr	1068.05	680.213	234.207	689.912	1177.37	1122.51	1425.98	1289.22	726.873	657.265	649.121	860.064	964.309	780.97	722.064	823.419	1012.29	1083.35	1110.81	1162	1712.84	1652.83	1811.3	1717.93	1048.66	999.606	1090.69	1103.53	1151.45	1227.4	1194.37	1227.14
28	67186	Rplp2	5082.89	3274.39	3899.55	3757.04	1602.38	1332.05	1502.58	1714.61	3861.06	3687.45	3897.92	3782.41	3255.81	2704.54	3068.77	2701.18	6646.11	6715.75	6735.35	6348.83	7394.64	7411.15	6736.27	7344.27	6635.14	6644.97	6536.95	6290.24	7738.29	8432.95	7863.83	8053.05
5735	231712	Trafd1	233.178	192.773	160.042	134.523	269.934	329.27	403.636	416.716	208.706	172.371	268.602	181.966	304.518	342.396	324.108	349.421	131.075	114.973	121.78	128.161	256.943	281.804	238.598	238.019	170.341	163.092	158.359	149.399	259.008	262.367	250.652	244.965
3510	68794	Flnc	1425.16	421.347	628.457	436.24	901.695	1040.19	1384.73	1067.84	2533.26	2173.16	2727.59	2185.15	3166.99	3577.84	3651.35	3849.71	256.963	214.701	235.378	203.919	416.02	410.978	480.831	441.384	1251.56	1156.73	1227.8	1119.3	1659.51	1778.01	1794.2	1787.25
1941	70083	Metrn	39.5294	30.2929	70.2622	15.3741	17.2298	14.9668	2.94624	8.68159	17.9919	17.7204	15.9882	20.2185	5.07531	23.0829	12.3079	12.1538	79.5444	98.1398	76.1518	69.2072	60.8641	47.9034	68.0765	47.9537	50.1002	55.3067	62.384	55.6526	48.7787	34.6156	46.0535	40.3861
8529	217705	Fam161b	9.68862	2.7539	19.5173	0	5.74328	14.9668	11.785	8.68159	3.59838	8.05472	6.39528	7.77634	5.07531	30.7771	16.4106	18.2307	4.49599	5.39928	5.34951	5.12646	10.0287	5.94662	7.2703	9.10071	7.2019	10.37	10.2831	10.1187	11.3359	10.3523	13.967	14.2344
10	67160	Eef1g	18002.7	22590.2	25907.2	21485.3	12417	11150.3	10983.6	11407.6	20287.7	19872.6	19726.2	20475.1	15895.9	14115.2	15553.1	15134.5	18111.6	18593.2	17868	17757.5	22426.3	23570.4	21747.1	22820.4	14922.3	14940	14926.6	15044.7	18839.9	20068	19044.6	20400.3
1102	81703	Jdp2	52.6134	44.0624	54.6484	40.357	22.9731	37.417	17.6775	4.3408	0	12.8876	19.1858	10.8869	12.6883	7.69429	8.20528	15.1922	122.083	139.111	116.745	115.63	120.345	136.772	100.132	148.762	35.6964	41.1658	42.8461	55.6526	30.229	38.8213	32.464	46.3447
1959	433022	Plcxd2	112.106	30.2929	27.3242	21.1394	22.9731	7.48341	44.1937	34.7264	35.9838	19.3313	41.5693	17.108	109.119	69.2486	82.0528	106.346	71.2441	77.4955	73.6344	63.2263	167.03	149.657	161.929	180.264	133.392	129.154	132.309	121.424	327.023	313.158	347.289	358.178
1707	226551	Suco	1148.38	374.53	163.945	313.247	735.14	636.09	683.529	599.03	698.086	581.551	546.797	536.568	1050.59	865.607	791.809	707.958	1146.48	1044.6	1087.84	1020.73	1970.47	1743.35	1868.47	1619.58	1837.11	1674.91	1598.67	1491.91	2246.91	2102.82	1977.28	1884.24
6303	20148	Dhrs3	8.08816	13.7695	11.7104	11.5306	0	0	5.89249	0	7.19677	25.7751	12.7906	15.5527	10.1506	0	12.3079	9.11534	8.99197	11.7514	9.44031	13.9554	3.45819	4.29478	4.95702	2.80022	6.57565	10.0558	7.54092	7.44019	3.77863	5.82319	6.79478	7.28274
6206	213980	Fbxw10	15.153	5.5078	3.90346	1.92176	0	0	11.785	8.68159	3.59838	6.44378	6.39528	9.33161	2.53765	11.5414	12.3079	6.07689	12.4504	15.245	15.4192	16.2338	17.6367	14.5362	17.8453	14.0011	41.0195	26.0821	37.0191	30.6536	36.4123	29.4395	38.5038	17.2137
5034	54399	Bet1l	190.746	63.3397	78.0691	101.853	218.245	239.469	167.936	169.291	151.132	70.8815	67.1505	85.5398	177.636	200.051	237.953	236.999	135.917	125.771	149.786	145.819	241.381	262.643	270.654	296.823	156.563	173.776	166.929	165.47	327.71	338.715	350.309	339.309
7	14694	Rack1	16940.7	23854.3	26996.3	23843.3	12951.1	12504.8	11390.2	13117.9	22752.6	23368.4	23029.4	22185.9	18735.5	17396.8	17661.9	16483.6	13270.1	13859.9	13405.9	13464.9	16698.5	17908.6	16184	17237.1	12269.5	12312	12807.9	12096.3	16599.9	17279.7	16440	17054.2
9491	116914	Slc19a2	943.168	545.272	687.008	534.25	1441.56	1347.01	1387.68	1080.86	564.946	478.45	594.761	423.033	1281.52	1334.96	1415.41	1412.88	554.736	556.126	577.747	564.48	1390.19	1186.35	1225.38	1214.24	546.718	435.854	532.32	470.815	1416.3	1275.6	1422.37	1339.36
3357	12795	Plk3	240.893	173.496	245.918	190.254	516.895	568.739	338.818	421.057	208.706	211.034	169.475	158.637	266.454	296.23	205.132	197.499	199.207	176.906	157.968	193.381	365.876	350.851	239.589	295.073	165.017	186.032	151.847	165.47	181.718	190.548	132.876	146.979
2776	53881	Slc5a3	345.616	165.234	136.621	199.863	361.827	329.27	409.528	416.716	219.501	201.368	175.87	181.966	357.809	503.976	348.724	483.113	252.467	272.822	238.84	296.765	499.362	467.471	413.085	492.488	279.935	279.047	264.96	281.834	508.054	541.233	491.489	642.867
2022	268752	Wdfy2	55.7965	11.0156	7.80691	17.2959	17.2298	29.9336	23.57	30.3856	64.7709	37.0517	28.7788	35.7712	22.8389	42.3186	41.0264	21.2691	80.5819	58.7568	77.7252	68.3528	71.9303	62.7699	59.4843	59.8547	107.715	102.443	93.2332	91.9608	92.0612	85.4068	93.9945	92.3584
2133	70382	Kctd2	24.0346	27.539	46.8415	28.8264	5.74328	14.9668	8.83873	4.3408	10.7951	14.4985	12.7906	12.4422	12.6883	15.3886	0	3.03845	48.4183	45.4175	51.9217	43.5749	27.3197	28.4117	27.4289	31.5025	35.6964	36.1379	27.0788	33.3321	22.6718	20.3812	27.1791	19.862
1494	20740	Sptan1	2687.58	1550.45	1612.13	1629.65	3130.09	3711.77	3564.96	3871.99	1741.62	1946.02	1940.97	2101.17	3352.24	3327.78	3040.05	3482.06	1797.36	1874.5	1786.42	1869.16	3364.12	3555.42	3636.14	3672.84	2065.38	2034.72	2175.56	2275.21	3232.79	3332.16	3256.21	3384.16
24	20042	Rps12	18010.9	8242.42	7803.01	9134.13	3514.89	3389.98	3220.25	3307.69	8733.28	7946.79	8339.45	8244.48	5529.55	4478.07	5021.63	4433.09	28637.4	29771.3	29761.5	28649.2	28678	29822.7	27217	29115.6	27723.6	27360.5	27238.8	25602.9	30873.1	32987.7	31366.6	32194.3
5281	67492	Zfand4	18.0576	2.7539	3.90346	17.2959	17.2298	7.48341	11.785	34.7264	10.7951	9.66566	9.59292	17.108	12.6883	15.3886	16.4106	12.1538	21.7882	21.2795	19.51	26.7715	28.0113	23.7865	26.107	31.5025	15.3432	16.0264	18.8523	21.4278	20.9542	23.6163	20.0069	25.8206
6798	11749	Anxa6	18.9173	5.5078	11.7104	19.2176	22.9731	7.48341	35.3549	21.704	32.3854	33.8298	22.3835	31.1054	40.6025	46.1657	28.7185	45.5767	4.49599	4.44646	5.97886	8.25929	6.91637	9.58067	9.25311	8.05063	12.8382	14.1409	13.368	12.4995	19.2367	20.3812	12.0796	20.193
3589	70247	Psmd1	2855.01	2321.54	1311.56	2527.12	4083.47	4400.24	5135.3	4770.54	2486.48	2382.59	2577.3	2808.82	4986.49	4020.26	4110.84	3971.25	1619.25	1643.92	1598.24	1681.19	2904.18	3129.58	3198.6	3055.39	1737.22	1692.51	1755.32	1760.94	2669.09	2751.46	2720.93	2693.62
5327	109857	Cbr3	327.381	170.742	160.042	167.193	384.8	366.687	318.194	425.398	435.404	412.402	434.879	399.704	964.309	823.289	873.862	884.188	62.598	53.6752	56.0125	53.543	149.394	137.103	143.093	134.06	195.078	182.575	181.325	161.006	358.97	382.389	349.176	327.723
1551	20667	Sox12	40.4078	30.2929	85.876	67.2616	17.2298	0	17.6775	4.3408	14.3935	32.2189	35.1741	38.8817	17.7636	3.84714	16.4106	18.2307	98.9117	76.8603	83.7041	82.0233	44.2648	46.2515	32.0554	37.1029	59.8071	52.4785	61.6984	49.1053	36.4123	32.9981	33.2189	26.1517
423	68028	Rpl22l1	520.195	674.706	195.173	699.521	269.934	314.303	247.485	217.04	636.914	750.7	518.018	877.172	700.393	473.199	467.701	373.729	487.296	497.051	481.456	478.469	578.209	584.421	568.075	596.447	519.789	476.078	508.326	475.875	636.871	618.229	574.159	629.295
7346	14137	Fdft1	234.962	101.894	121.007	98.0098	172.298	157.152	262.216	299.515	208.706	335.076	252.614	318.83	532.907	592.46	603.088	659.343	60.8688	57.804	65.1381	81.4537	108.933	133.469	144.415	137.911	121.18	170.319	143.277	170.529	250.764	303.776	286.513	332.358
39	20104	Rps6	13131.1	13786	11171.7	14766.8	6857.48	6630.3	6145.87	6367.95	14019.3	12929.4	13407.7	13450	10457.7	8971.54	9472.99	8626.15	14120.9	14880.4	14750.8	14620.7	17296.1	18081	16827.4	17260.2	13250.9	13189.1	13380.3	12946.2	16710.5	17817.3	17132.7	17737.4
2954	20334	Sec23a	336.487	170.742	206.883	230.611	419.26	419.071	506.754	421.057	277.075	318.967	271.8	328.162	487.23	488.587	504.624	607.689	193.673	196.28	194.785	218.444	297.058	334.002	385.987	401.831	233.592	244.167	260.847	266.656	344.542	384.977	398.627	417.102
5609	67516	Kctd4	20.1472	5.5078	3.90346	11.5306	17.2298	22.4502	14.7312	8.68159	10.7951	17.7204	22.3835	20.2185	15.2259	0	16.4106	36.4614	21.4424	25.4084	16.9926	21.645	27.3197	23.4561	25.4461	25.552	36.0095	25.7679	34.2769	27.0823	30.229	21.6752	23.7817	15.2275
9985	218544	Sgtb	53.3781	11.0156	0	13.4523	11.4866	7.48341	23.57	21.704	32.3854	40.2736	60.7552	37.3265	81.2049	38.4714	49.2317	45.5767	25.9384	27.6316	30.209	30.4739	61.5557	62.1092	48.2484	49.0038	89.2409	68.1906	79.5224	72.6163	132.939	131.345	137.028	134.731
23	26961	Rpl8	14916.2	21483.2	26227.3	21097.1	11641.6	11314.9	10229.4	11025.6	21370.8	19985.4	21708.8	19230.9	15708.1	15580.9	15905.9	16143.3	12129.5	12295.4	12038.3	11399.2	14006	14384.6	13374.1	14223	11256.6	11115.7	11381	10677.9	13409	14476.8	13674.9	13908.7
6353	74442	Sgms2	84.8376	33.0468	11.7104	26.9047	51.6895	74.8341	44.1937	30.3856	151.132	61.2159	105.522	48.2133	91.3555	88.4843	69.7448	57.7305	59.1395	50.4991	59.474	48.1317	88.5296	71.3595	87.5741	69.6554	191.633	129.468	153.218	122.614	158.359	109.67	159.677	124.8
3692	19338	Rab33b	110.957	46.8163	54.6484	44.2005	120.609	97.2843	91.3336	112.861	50.3774	49.9393	73.5458	63.766	86.2802	88.4843	98.4633	78.9996	110.67	101.316	102.585	105.377	180.863	173.774	175.809	171.863	128.382	131.668	118.255	123.507	175.535	162.079	158.167	162.206
521	68180	Hyi	49.4102	82.617	167.849	80.714	63.1761	52.3838	38.3012	43.408	57.5741	46.7174	95.9292	59.1002	50.7531	76.9429	53.3343	97.2303	27.6676	32.7133	34.9291	30.4739	39.4233	35.3494	34.0382	29.0523	29.747	23.5682	26.3932	22.9158	28.5115	25.5573	24.1592	21.1862
9168	84004	Mcam	185.548	198.281	226.4	165.271	425.003	516.355	365.334	412.376	93.558	90.2129	108.72	96.4267	238.539	211.593	188.721	157.999	114.821	112.114	110.137	129.301	254.522	289.733	249.504	250.62	69.514	58.4491	68.211	59.5215	128.13	127.787	114.001	120.827
2393	12703	Socs1	21.0044	41.3085	66.3588	26.9047	11.4866	14.9668	2.94624	8.68159	25.1887	38.6627	25.5811	31.1054	20.3012	23.0829	28.7185	21.2691	23.8633	17.7859	18.5659	19.3666	7.60801	10.2414	9.91405	9.45074	20.9794	23.254	23.9938	19.3445	22.3283	13.2639	11.7021	12.9103
20	66489	Rpl35	9225.94	15757.8	16706.8	14714.9	8063.57	7071.82	6490.58	6684.83	16617.3	15716.4	16637.3	15067.4	13023.2	12160.8	11967.4	12497.1	5018.21	5346.87	5304.82	5215.89	5602.26	5779.13	5357.22	5825.5	6225.89	5974.07	6085.86	5784.3	7063.63	7684.02	7252.3	7306.9
2887	67245	Peli1	172.926	60.5858	78.0691	99.9316	189.528	179.602	173.828	177.973	115.148	88.6019	124.708	125.977	175.098	173.121	188.721	176.23	144.563	143.24	166.149	148.952	271.122	250.419	248.843	241.869	181.613	171.891	157.674	181.243	238.054	208.988	233.665	245.296
1698	68795	Ubr3	1001.37	710.506	566.001	678.382	1297.98	1466.75	1573.29	1358.67	813.235	803.861	677.9	772.969	1360.18	1265.71	1370.28	1200.19	635.318	601.225	655.472	668.148	1240.45	1150.34	1223.06	1081.93	748.684	729.043	705.076	763.959	1254.85	1189.22	1300.45	1179.47
3308	21827	Thbs3	35.221	19.2773	15.6138	17.2959	17.2298	37.417	41.2474	30.3856	28.7871	37.0517	51.1623	45.1028	32.9895	53.86	69.7448	42.5383	19.3673	22.2323	24.8595	21.3602	20.7491	21.4739	28.4203	28.3522	48.2214	42.1085	57.2424	45.534	41.2214	46.262	43.0336	41.7102
8816	228775	Trib3	484.611	688.475	819.726	484.284	1407.1	1571.52	1157.87	1606.09	197.911	244.863	223.835	261.285	230.927	396.256	233.85	334.229	378.009	296.643	313.418	244.646	637.689	711.282	662.258	799.812	114.291	142.666	131.966	158.922	120.916	143.962	129.478	178.758
6344	56323	Dnajb5	9.40407	5.5078	11.7104	7.68705	0	29.9336	14.7312	17.3632	7.19677	4.83283	9.59292	9.33161	17.7636	11.5414	12.3079	0	4.15014	4.76407	6.92289	5.69606	5.18728	6.27699	7.93124	8.05063	8.4544	6.91334	9.59753	7.44019	13.397	14.2345	9.4372	13.5724
9238	16665	Krt15	207.618	380.038	242.014	322.856	384.8	598.673	686.475	690.187	172.722	214.256	111.917	97.9819	88.8179	327.007	102.566	157.999	130.729	95.9166	127.13	146.389	134.869	241.829	250.825	241.519	67.3221	83.2743	51.7581	36.6057	41.2214	109.023	49.4509	49.9861
3798	407812	Zfp941	36.1008	16.5234	15.6138	23.0611	68.9194	59.8673	23.57	13.0224	17.9919	20.9423	9.59292	10.8869	25.3765	7.69429	24.6158	9.11534	49.11	48.5935	41.5374	39.3028	58.7892	41.6264	57.5015	52.5041	51.9789	45.5652	49.7015	32.1416	55.6489	50.7911	52.8483	44.6895
8627	225994	Nmrk1	30.7417	11.0156	11.7104	13.4523	45.9463	22.4502	8.83873	26.0448	25.1887	12.8876	12.7906	10.8869	40.6025	26.93	24.6158	36.4614	28.3593	33.3485	27.0622	31.898	52.9102	56.1626	38.9953	52.1541	25.3632	28.2818	22.28	32.7368	47.4046	53.3792	41.5237	51.3102
6190	381269	Mreg	253.911	44.0624	70.2622	42.2787	143.582	82.3175	109.011	91.1567	82.7628	19.3313	38.3717	40.437	78.6673	76.9429	127.182	130.653	255.234	301.407	282.265	302.176	735.902	761.168	660.937	750.809	155.624	155.864	160.073	186.6	503.932	452.591	479.787	549.847
2336	18671	Abcb1a	9.2394	2.7539	7.80691	11.5306	11.4866	0	17.6775	21.704	0	11.2766	12.7906	12.4422	7.61296	7.69429	12.3079	3.03845	7.60859	14.2922	7.55225	8.8289	8.99128	6.60736	4.62656	6.65052	10.9594	10.0558	11.9969	10.4163	12.3664	9.3818	8.68222	7.28274
4333	20684	Sp100	15.4341	22.0312	15.6138	24.9829	74.6627	37.417	23.57	39.0672	3.59838	6.44378	0	7.77634	7.61296	11.5414	4.10264	3.03845	18.6756	18.1035	18.2513	15.6642	19.02	22.465	30.4031	14.0011	4.07064	4.3994	5.82707	3.57129	6.52672	6.1467	4.90734	4.9655
342	208043	Setd1b	128.063	324.96	538.677	259.438	189.528	179.602	197.398	195.336	255.485	254.529	271.8	188.188	162.41	192.357	164.106	188.384	22.8258	19.6915	20.7687	17.373	33.1986	21.8043	23.4632	22.7518	26.6157	26.7106	33.5914	32.1416	32.2901	20.3812	25.6692	28.4689
8167	217344	Rhbdf2	286.961	272.636	374.732	194.098	597.301	613.639	548.001	577.326	305.863	296.414	287.788	230.18	365.422	469.351	385.648	391.96	142.834	134.982	125.556	121.041	274.58	310.876	236.615	253.07	146.23	134.81	146.362	140.768	217.099	208.988	193.651	197.958
4160	235283	Gramd1b	10.9486	5.5078	3.90346	7.68705	0	22.4502	8.83873	17.3632	17.9919	22.5532	3.19764	15.5527	10.1506	7.69429	12.3079	12.1538	6.22521	6.6697	7.23757	8.5441	6.57055	4.95552	6.93983	7.35057	10.9594	12.2555	19.1951	16.0708	18.8932	15.5285	12.0796	12.5793
4655	73368	Col20a1	28.7177	5.5078	0	9.60881	0	7.48341	5.89249	30.3856	14.3935	3.22189	12.7906	9.33161	10.1506	3.84714	0	3.03845	58.102	46.3703	52.8657	57.2454	50.8353	43.2782	65.4327	53.9042	49.787	49.3361	45.931	46.1292	48.7787	36.8802	36.6163	33.1034
3730	105501	Abhd4	264.67	214.804	167.849	192.176	459.463	404.104	424.259	386.331	205.108	222.31	233.428	206.851	378.11	492.434	414.366	407.152	148.368	139.111	157.024	144.68	269.738	286.099	276.602	254.47	156.876	159.635	134.023	132.138	282.71	291.483	263.486	299.585
1822	78787	Usp54	28.445	27.539	35.1311	30.7482	17.2298	0	14.7312	8.68159	50.3774	33.8298	15.9882	40.437	30.4518	34.6243	32.8211	36.4614	23.8633	29.2196	27.3769	24.4931	29.3946	17.1791	25.1156	21.3517	42.8983	36.1379	37.7046	39.8794	27.4809	29.763	32.0865	28.7999
2943	74149	Zfp946	20.5324	5.5078	0	9.60881	0	22.4502	8.83873	17.3632	10.7951	4.83283	3.19764	10.8869	7.61296	3.84714	8.20528	3.03845	39.4263	41.6062	39.0199	34.4612	27.3197	26.4294	29.0812	34.3027	33.1914	33.3097	29.1354	40.177	28.168	28.4689	23.7817	32.4413
9265	231147	Sh3tc1	31.9975	30.2929	11.7104	13.4523	57.4328	44.9004	23.57	26.0448	39.5822	28.997	38.3717	26.4396	60.9037	46.1657	57.4369	51.6536	13.488	16.833	16.3632	20.5058	29.3946	31.0546	28.0898	30.1024	18.4744	27.3391	19.5378	25.5943	40.5344	36.8802	40.3912	40.3861
3530	269328	Muc15	10.7514	11.0156	0	5.76528	11.4866	7.48341	8.83873	17.3632	25.1887	8.05472	19.1858	13.9974	20.3012	15.3886	8.20528	21.2691	4.15014	2.22323	4.40548	7.40488	3.11237	4.29478	4.62656	2.45019	16.9088	18.2261	11.9969	16.3684	11.3359	11.6464	8.68222	11.9172
6083	140810	Ttbk2	101.312	24.7851	7.80691	9.60881	17.2298	14.9668	35.3549	26.0448	21.5903	28.997	31.9764	31.1054	50.7531	26.93	69.7448	33.4229	101.333	114.02	103.214	95.1243	160.46	130.165	143.754	136.861	192.573	177.861	178.24	169.339	280.993	228.722	267.639	230.068
3884	67812	Ubxn4	1406.01	754.569	577.712	839.81	1401.36	1855.88	1499.64	1649.5	939.178	847.356	812.201	782.3	1634.25	1819.7	1694.39	1810.91	983.93	1002.36	993.121	1046.37	1755.03	2100.81	1931.26	1954.9	1094.06	1061.51	1072.52	1103.23	2074.81	2203.75	2039.57	2250.37
753	52013	R3hcc1l	255.208	148.711	66.3588	169.115	338.854	239.469	335.872	247.425	136.739	140.152	182.266	197.519	210.625	192.357	196.927	236.999	259.73	250.59	243.56	242.652	357.922	371.003	386.978	369.629	256.763	261.136	264.275	252.074	327.023	339.686	334.832	354.206
839	237500	Tmtc3	1161.28	751.815	405.959	759.096	1372.64	1414.36	1481.96	1358.67	971.563	982.676	1036.04	1127.57	1735.76	1546.55	1571.31	1428.07	842.133	800.999	805.888	845.011	1410.59	1332.7	1315.26	1290.2	948.772	917.903	939.873	1047.28	1403.25	1317.98	1420.49	1417.15
4270	229715	Amigo1	11.6191	8.2617	0	7.68705	17.2298	0	11.785	13.0224	3.59838	8.05472	12.7906	10.8869	7.61296	0	8.20528	3.03845	18.3298	17.7859	15.1045	18.5122	14.8702	17.1791	16.8539	16.4513	14.7169	13.1982	9.9403	14.8804	13.7405	14.2345	14.3445	17.8758
3751	192970	Dhrs11	59.8719	44.0624	39.0346	48.044	132.096	82.3175	97.2261	73.7935	68.3693	85.38	47.9646	68.4318	116.732	88.4843	69.7448	85.0765	28.3593	26.9964	29.5796	33.322	54.9852	44.5997	47.257	42.3533	45.0902	38.9661	42.5034	39.8794	61.8321	57.9084	57.3781	58.2619
4564	66994	Cep19	79.3859	11.0156	7.80691	15.3741	28.7164	7.48341	23.57	26.0448	17.9919	20.9423	22.3835	20.2185	22.8389	19.2357	41.0264	51.6536	82.3112	97.8222	83.7041	84.5866	98.9041	111.664	94.1835	107.108	108.655	135.124	130.595	136.304	225.687	202.841	221.585	203.586
9108	12452	Ccng2	38.4068	8.2617	0	7.68705	5.74328	0	11.785	21.704	46.779	41.8845	47.9646	31.1054	48.2154	61.5543	49.2317	45.5767	21.4424	9.84574	11.643	13.9554	21.4408	24.1169	26.107	21.0016	61.999	60.6488	86.7206	59.5215	74.5421	92.2005	95.5044	82.4274
5550	108897	Aif1l	73.4997	19.2773	19.5173	17.2959	34.4597	44.9004	41.2474	17.3632	79.1644	53.1611	92.7316	55.9897	71.0543	84.6371	53.3343	82.0381	58.102	69.2378	59.7886	51.5494	84.7256	76.6454	86.9132	79.1062	107.715	106.842	103.173	102.377	125.725	122.287	143.068	135.062
8034	235533	Gk5	30.5047	5.5078	19.5173	13.4523	22.9731	22.4502	26.5162	17.3632	25.1887	20.9423	12.7906	20.2185	30.4518	50.0129	36.9237	42.5383	20.059	26.9964	22.6567	23.3539	35.6193	37.9923	26.107	46.2036	39.767	36.7664	34.6197	39.5818	51.8703	48.2031	42.6561	46.3447
5634	12450	Ccng1	5831.2	600.35	249.821	614.964	1292.24	980.326	981.099	1041.79	597.332	449.453	530.808	553.676	1443.93	1284.95	988.736	1051.3	7192.89	7599.96	7430.15	7401.18	13934.1	14601.3	13130.2	13767.3	6448.21	6534.05	6282.61	6450.05	13737.7	14342.8	14055	15199.1
8892	16570	Kif3c	24.8358	5.5078	3.90346	7.68705	0	0	14.7312	21.704	7.19677	24.1642	28.7788	15.5527	20.3012	11.5414	57.4369	24.3076	14.1797	17.7859	19.1953	18.5122	23.8615	34.0279	22.8023	31.5025	28.1813	28.2818	26.3932	33.6297	57.71	52.4087	54.7357	63.8895
7232	245671	Klf8	11.2079	0	3.90346	7.68705	5.74328	29.9336	5.89249	0	10.7951	1.61094	15.9882	13.9974	12.6883	23.0829	8.20528	18.2307	9.68366	5.08167	6.60822	8.25929	11.7578	6.27699	9.58358	9.45074	14.7169	12.5697	16.7957	18.4517	13.397	16.499	19.6294	10.9241
4313	319482	9530053A07Rik	115.319	82.617	152.235	96.0881	287.164	194.569	226.861	190.995	68.3693	41.8845	63.9528	46.6581	96.4309	157.733	106.669	106.346	88.8822	94.011	100.382	94.2699	159.422	171.791	183.41	160.313	49.4739	42.737	44.2172	42.2603	107.176	111.288	95.1269	111.558
10032	12579	Cdkn2b	72.6212	49.5702	62.4553	23.0611	63.1761	97.2843	73.6561	117.202	61.1725	40.2736	54.3599	45.1028	126.883	100.026	82.0528	133.692	30.0885	29.2196	33.3558	37.0244	61.9015	77.3061	66.7546	69.3054	53.8577	56.2494	51.0726	51.7837	117.825	120.669	126.836	138.041
4557	20688	Sp4	33.8732	8.2617	3.90346	15.3741	22.9731	29.9336	17.6775	13.0224	14.3935	8.05472	28.7788	18.6632	30.4518	38.4714	12.3079	18.2307	37.0054	37.4773	42.7961	34.746	43.919	41.296	38.0039	48.6538	62.9383	51.85	53.1292	53.5694	53.5878	56.9378	54.7357	58.924
5533	434204	Whamm	99.4518	52.3241	117.104	49.9658	149.325	179.602	100.172	169.291	68.3693	66.0487	73.5458	65.3213	104.044	173.121	118.976	106.346	67.4398	64.1561	68.2849	76.0425	111.699	142.719	124.256	115.159	60.7465	65.0482	59.6418	64.5809	126.069	115.817	110.604	117.186
1946	22027	Hsp90b1	6121.28	5411.41	2775.36	5415.52	8689.59	9795.78	9781.53	10313.7	5793.4	5981.43	5132.21	7176.01	9414.7	9333.17	8398.1	10531.3	3501.34	3766.47	3306.31	4005.76	5446.64	5612.29	5420.67	6098.53	3731.21	3759.6	3458.2	4290.61	5231	6151.55	5182.91	6853.39
1007	57339	Jph1	39.295	27.539	66.3588	51.8876	17.2298	22.4502	20.6237	17.3632	32.3854	37.0517	19.1858	29.5501	30.4518	3.84714	32.8211	15.1922	65.0189	59.7097	59.474	64.3655	58.0975	58.4751	55.1882	70.7055	41.6458	34.2524	35.9907	41.3675	33.3206	40.1153	37.7488	38.7309
4229	17060	Blnk	35.9433	19.2773	3.90346	11.5306	5.74328	22.4502	35.3549	17.3632	79.1644	51.5502	44.767	40.437	81.2049	80.79	61.5396	63.8074	13.488	16.833	20.1393	14.525	18.3284	13.8755	19.1672	19.6015	49.4739	51.5358	50.7298	31.5464	40.5344	51.1147	40.7687	43.6964
4759	240068	Zfp563	18.5227	5.5078	0	5.76528	17.2298	14.9668	2.94624	4.3408	7.19677	12.8876	6.39528	21.7738	7.61296	11.5414	4.10264	24.3076	17.6381	31.4429	26.1182	22.2147	19.3658	19.4917	26.4375	20.6516	29.747	30.7958	29.1354	30.356	33.6642	22.9692	32.8414	34.7585
4124	110173	Manba	16.4485	13.7695	7.80691	21.1394	40.203	22.4502	23.57	30.3856	7.19677	24.1642	12.7906	18.6632	22.8389	15.3886	4.10264	30.3845	13.488	14.6098	10.0697	9.96811	11.7578	14.2058	16.8539	9.80077	8.76753	16.6549	17.1385	10.4163	13.397	18.1166	16.232	13.5724
7085	18452	P4ha2	170.203	156.972	191.269	142.21	333.11	359.204	335.872	329.901	165.526	148.207	137.499	141.529	274.067	253.911	299.493	358.537	69.169	71.1434	73.0051	60.9479	116.887	145.362	130.865	139.661	72.019	73.2185	67.1827	65.7713	137.748	151.726	114.379	159.889
7960	621603	Aldh3b2	30.9592	13.7695	15.6138	15.3741	5.74328	67.3507	38.3012	4.3408	82.7628	67.6596	70.3481	48.2133	68.5167	61.5543	20.5132	42.5383	7.95444	8.89293	7.23757	7.68969	5.87892	16.5184	12.2273	12.951	29.747	38.9661	25.7077	32.1416	26.7939	52.0852	24.5367	27.8068
9648	233016	Blvrb	1103.11	771.092	995.381	807.14	1728.73	2282.44	1505.53	1784.07	1219.85	1243.65	978.478	1082.47	1756.06	2392.92	2006.19	2281.87	416.398	386.842	402.157	361.7	762.53	870.85	780.897	863.867	594.626	558.723	574.824	519.325	1078.28	1104.14	1038.09	1047.39
2791	13803	Enc1	263.532	198.281	222.497	207.55	568.585	374.17	409.528	421.057	176.321	177.204	166.277	205.296	337.508	430.88	348.724	431.459	154.247	170.236	160.485	171.167	280.459	280.813	291.473	304.524	127.755	139.524	153.903	146.423	280.306	273.043	269.149	290.648
1619	72881	Zdhhc4	85.5361	19.2773	46.8415	44.2005	17.2298	0	20.6237	0	50.3774	28.997	31.9764	24.8843	20.3012	23.0829	28.7185	15.1922	187.102	182.305	187.547	161.199	132.794	131.156	130.865	133.71	144.038	141.723	131.966	132.138	116.794	125.199	124.193	117.186
1195	14827	Pdia3	7037.8	6221.06	3638.02	6386.01	10803.1	11778.9	11587.6	11598.6	8528.17	8486.45	8157.18	9526.02	14386	14003.6	13608.4	14934	2710.04	2699.64	2593.88	2892.46	4297.83	4297.1	4272.29	4536.7	3482.59	3448.81	3375.59	3791.22	5267.75	5572.47	5313.52	5976.81
3055	74201	Cep97	32.7328	11.0156	23.4207	23.0611	28.7164	22.4502	29.4624	56.4304	17.9919	20.9423	28.7788	29.5501	32.9895	26.93	28.7185	36.4614	33.8928	35.2541	37.7612	39.5876	41.1524	40.6353	38.6648	40.6032	25.0501	36.1379	37.3618	38.9866	35.3817	36.8802	40.3912	40.0551
9733	15500	Hsf2	324.353	267.128	109.297	295.951	470.949	493.905	571.571	447.102	205.108	207.812	249.416	219.293	563.359	434.727	533.343	501.344	180.185	197.55	186.918	188.825	366.914	406.683	407.137	385.38	179.108	153.665	165.557	176.481	397.787	353.273	371.071	368.109
5963	16688	Krt6b	51.927	19.2773	39.0346	15.3741	22.9731	59.8673	47.1399	39.0672	50.3774	156.262	76.7434	80.874	71.0543	150.039	131.284	100.269	10.7212	12.7042	9.44031	7.40488	13.8327	14.2058	11.8969	10.5008	42.8983	83.9028	53.1292	43.1531	43.9695	85.0833	61.908	45.3516
2362	224598	Zfp758	59.5276	24.7851	7.80691	17.2959	22.9731	44.9004	26.5162	39.0672	21.5903	14.4985	19.1858	34.2159	17.7636	30.7771	12.3079	24.3076	83.0028	110.526	108.564	118.763	91.9877	94.4853	98.4795	121.109	78.2815	92.3873	74.7236	104.46	72.1375	79.2601	77.7625	81.4343
59	20115	Rps7	7732.51	10291.3	7806.91	11409.5	4962.2	4602.3	4531.32	4471.02	10374.1	10062	10804.8	10692.5	8326.04	6982.56	7852.45	7043.12	6786.17	7143.88	7086.53	7104.42	7712.45	8269.44	7629.19	7819.26	6657.37	6603.18	6737.13	6555.7	8136.08	8559.76	8151.47	8543.65
884	56210	Rev1	310.483	181.757	132.718	163.35	333.11	261.919	356.496	368.968	140.337	130.486	95.9292	160.193	248.69	211.593	225.645	188.384	346.537	348.412	344.886	343.757	545.702	542.464	512.556	513.49	294.965	295.702	281.756	272.013	448.626	439.974	463.555	431.006
3249	14629	Gclc	3657.16	2280.23	1670.68	2400.28	4646.32	4781.9	4454.72	4015.24	1666.05	1641.55	1678.76	1410.63	4671.82	3893.31	3565.19	3861.87	3235.38	3066.15	3333.37	3031.45	6191.19	5653.59	5763.37	5241.31	2620.24	2351.79	2364.08	2254.97	5854.47	5551.76	5084.76	5135.66
31	19951	Rpl32	9554.99	11395.6	10941.4	12845.1	5749.03	5395.54	5406.36	5239.34	10885.1	10997.9	11658.6	11194.8	8648.32	6982.56	7819.63	6964.12	10078.6	10395.2	10294.7	9727.74	10957.3	11480.9	10562.4	11559	9000.18	8776.17	9040.88	8444.02	10671.2	10932.1	10887.5	11273.3
9267	212168	Zswim4	322.468	123.926	136.621	88.401	223.988	306.82	194.452	247.425	313.059	272.25	367.729	223.959	243.615	361.631	307.698	373.729	189.523	159.12	177.793	139.838	378.671	345.235	310.31	314.675	535.759	442.768	495.644	401.175	635.153	594.612	555.662	535.281
11	27367	Rpl3	15142.8	19043.2	16956.6	19184.9	11854.1	12063.3	11396.1	11780.9	17506.1	17448.1	17596.6	17944.7	15322.4	13034.1	13128.4	12761.5	12366.7	12991	12705.7	12855.4	19003.8	20300.8	18687	19204.2	11886	12159.3	12085.7	11751.6	15942	17318.2	16095.3	17053.9
8525	76108	Rap2a	101.708	27.539	27.3242	11.5306	40.203	44.9004	47.1399	34.7264	10.7951	30.6079	25.5811	26.4396	65.979	73.0957	86.1554	85.0765	86.1154	80.9892	90.9417	80.8841	188.125	210.114	177.131	201.966	92.6853	99.3007	101.117	104.758	258.664	248.456	253.294	241.323
7447	66522	Pgpep1	78.3011	38.5546	39.0346	17.2959	45.9463	82.3175	50.0862	73.7935	39.5822	53.1611	47.9646	49.7686	91.3555	126.956	90.258	139.769	40.4639	41.2886	38.3906	43.2901	64.6681	81.9313	71.3811	78.0561	77.029	85.1597	83.6356	79.1636	148.397	177.931	147.975	182.731
90	268449	Rpl23a	6348.57	15388.8	13244.4	14768.7	7546.67	6450.7	6198.9	6558.94	15980.4	14899.6	14482.1	14286.7	11696	9448.58	9497.61	8975.57	1933.62	1871.01	1660.55	1387.85	1793.07	1913.16	1698.61	2077.41	1463.55	1510.56	1514.35	1447.56	1823.36	1578.73	1849.69	1858.75
4283	620078	C130026I21Rik	22.0299	8.2617	11.7104	7.68705	0	37.417	8.83873	26.0448	10.7951	14.4985	12.7906	3.11054	12.6883	7.69429	4.10264	18.2307	27.3218	26.9964	35.5585	35.3156	30.432	36.6709	33.3773	28.3522	29.747	32.367	27.4215	32.1416	29.1985	35.5862	32.0865	26.4827
1908	69151	Lzic	197.042	88.1248	93.683	121.071	264.191	217.019	209.183	186.654	140.337	127.265	86.3363	147.751	261.378	253.911	361.032	243.076	146.293	158.485	154.506	151.8	220.978	247.115	229.015	246.419	161.26	159.007	147.048	168.148	284.771	290.512	263.864	278.068
7357	212555	Slc66a1	55.1423	52.3241	54.6484	49.9658	91.8925	112.251	100.172	125.883	39.5822	51.5502	63.9528	60.6555	98.9685	123.109	98.4633	85.0765	19.3673	14.2922	16.3632	18.797	23.8615	33.6975	27.0984	40.9532	20.9794	22.3112	27.7643	24.999	47.0611	52.7322	51.7158	58.924
4121	668218	Bin2	13.196	16.5234	3.90346	15.3741	22.9731	22.4502	29.4624	17.3632	14.3935	8.05472	6.39528	10.8869	40.6025	26.93	16.4106	27.346	4.15014	2.85844	4.40548	2.84803	11.7578	13.5451	11.2359	8.40066	4.69689	6.59909	5.82707	2.08325	12.3664	15.852	12.4571	10.9241
4711	213582	Map9	15.2949	5.5078	3.90346	3.84352	5.74328	7.48341	5.89249	13.0224	25.1887	17.7204	15.9882	15.5527	2.53765	7.69429	12.3079	12.1538	10.7212	13.0218	16.0485	12.2465	8.64546	13.5451	11.8969	10.8508	30.0601	27.9676	23.6511	37.201	21.6412	25.5573	26.4241	30.1241
882	233724	Tmem41b	489.916	311.191	171.752	363.213	539.869	546.289	636.389	694.527	424.609	407.569	457.263	479.023	888.179	727.11	849.246	741.381	286.014	303.948	280.063	302.746	405.299	449.631	436.879	470.787	356.964	364.836	378.074	388.378	569.199	658.991	645.504	652.467
6906	269523	Vcp	6098.16	6165.98	4621.69	5903.65	10849.1	11524.4	12421.4	11368.5	6185.62	6166.69	6392.09	6583.45	11054	10514.2	10072	11032.6	2521.56	2463.34	2428.68	2552.12	4654.03	4880.53	5185.05	5087.3	2663.14	2623.3	2660.92	2638.89	4285.31	4544.68	4429.06	4569.59
4352	14356	Timm10b	75.8242	11.0156	0	1.92176	0	22.4502	11.785	0	0	3.22189	3.19764	15.5527	5.07531	15.3886	8.20528	0	157.705	159.755	157.968	143.256	119.999	138.424	117.977	141.061	126.503	133.553	139.85	124.995	140.496	131.992	154.015	165.186
7624	26448	Mok	13.9185	5.5078	7.80691	1.92176	5.74328	14.9668	5.89249	8.68159	17.9919	14.4985	12.7906	9.33161	15.2259	23.0829	20.5132	15.1922	7.26275	9.52814	11.643	9.96811	16.9451	12.2236	9.91405	11.5509	18.1613	18.5403	22.6228	16.3684	23.3588	21.6752	20.3843	22.1793
2342	103841	Cuedc1	25.3231	38.5546	39.0346	30.7482	5.74328	0	14.7312	4.3408	21.5903	20.9423	28.7788	18.6632	17.7636	3.84714	8.20528	24.3076	49.11	47.0055	56.9565	49.8406	23.5157	27.4205	28.7507	28.7022	38.2014	32.9955	33.9341	25.8919	16.4886	18.4401	16.6095	13.9034
7519	14866	Gstm5	19.2776	13.7695	0	0	5.74328	7.48341	5.89249	13.0224	39.5822	56.383	25.5811	27.9948	40.6025	38.4714	45.129	24.3076	6.22521	6.9873	10.3843	12.8161	11.7578	14.2058	10.2445	11.2009	20.6663	15.7121	20.9089	20.8325	23.7023	20.3812	23.7817	23.8344
3527	386454	Rnf39	23.6524	63.3397	46.8415	30.7482	0	7.48341	2.94624	8.68159	89.9596	56.383	44.767	62.2108	17.7636	34.6243	12.3079	12.1538	19.0215	20.6443	21.7127	13.1009	3.804	4.62515	4.95702	4.20033	30.9995	26.7106	28.4498	29.4632	8.93131	7.11723	8.68222	10.5931
3246	228677	Sptlc3	13.924	2.7539	7.80691	15.3741	28.7164	14.9668	17.6775	8.68159	14.3935	14.4985	47.9646	17.108	10.1506	23.0829	16.4106	27.346	6.57106	6.9873	11.9577	7.68969	6.22473	7.92883	7.2703	5.25041	9.70691	15.3979	22.6228	11.3091	9.61833	10.6758	16.232	9.26894
9363	15512	Hspa2	115.078	71.6014	148.331	73.0269	149.325	97.2843	226.861	243.085	75.566	125.654	127.906	139.974	215.701	203.899	229.748	218.768	40.118	47.9583	43.4254	39.018	61.2099	79.2883	101.784	96.9576	69.514	67.2479	73.3526	65.1761	103.054	119.052	102.299	111.227
69	19899	Rpl18	12351.8	22058.7	29525.7	20762.7	12503.1	11801.3	10152.8	11103.8	18819.5	17746.2	19176.3	16067.5	12731.4	13388.1	12923.3	13460.3	8706.31	8970.74	8839.91	8540.11	9597.85	10123.8	9185.7	9971.23	7589.86	7570.1	7696.54	7280.08	9118.87	9516.71	8800.37	9177.24
5692	12228	Btg3	101.225	11.0156	11.7104	21.1394	22.9731	37.417	8.83873	56.4304	25.1887	16.1094	15.9882	17.108	32.9895	42.3186	28.7185	48.6151	141.797	145.145	149.472	160.059	202.304	202.516	174.487	214.917	156.25	140.466	146.362	162.791	172.443	183.43	191.009	197.958
2556	13024	Ctla2a	42.4603	16.5234	15.6138	19.2176	40.203	7.48341	50.0862	13.0224	3.59838	6.44378	6.39528	6.22108	7.61296	3.84714	8.20528	3.03845	110.325	98.4574	104.787	117.909	102.708	120.915	108.394	103.258	30.6864	30.4815	33.9341	31.2488	25.4199	29.4395	31.3315	29.462
7923	12475	Cd14	49.5712	41.3085	31.2277	26.9047	34.4597	67.3507	82.4948	69.4527	39.5822	64.4378	67.1505	52.8791	81.2049	115.414	82.0528	124.576	16.2547	20.0091	15.1045	14.8098	23.1698	36.3405	29.4117	31.5025	28.4945	30.1673	29.1354	33.9273	54.2749	65.3491	60.3981	67.8619
5688	22057	Tob1	558.725	454.394	601.132	486.206	1068.25	1115.03	957.529	1046.13	676.496	583.162	633.133	517.905	1060.74	992.563	1050.28	1063.46	161.164	181.035	178.737	201.356	404.608	422.871	384.665	404.982	280.874	237.253	248.508	224.396	434.886	394.683	446.568	407.502
2867	74840	Manf	944.238	658.182	593.325	541.937	1160.14	1257.21	1084.22	1376.03	615.323	771.642	565.983	987.596	1207.92	1488.84	1271.82	1750.15	602.462	643.467	522.678	689.509	871.117	972.934	807.664	1057.08	596.505	656.767	571.739	811.874	1055.96	1259.43	1093.2	1728.66
2924	64933	Ap3m2	12.3754	16.5234	0	7.68705	5.74328	0	29.4624	13.0224	7.19677	4.83283	3.19764	9.33161	12.6883	23.0829	16.4106	27.346	10.3754	11.1162	10.699	12.2465	10.3746	9.58067	10.2445	5.95046	13.1513	11.3127	9.9403	14.8804	17.1756	20.0577	21.1393	18.8689
70	20005	Rpl9	9921.6	14989.5	11546.4	15731.5	7506.47	6480.63	6749.85	6758.62	12425.2	11898.4	12055.1	12481	10503.4	8213.65	8316.05	7641.69	9506.94	9970.24	9975.58	9937.92	10909.9	11685.8	11050.2	11451.8	7657.5	7777.5	7863.81	7552.09	9183.79	10272.1	9521.75	9955.17
2573	231532	Arhgap24	34.4412	11.0156	39.0346	11.5306	11.4866	14.9668	38.3012	47.7488	28.7871	33.8298	35.1741	17.108	32.9895	19.2357	16.4106	33.4229	39.4263	44.4646	49.719	41.8661	40.115	45.5908	40.9781	48.3038	39.1408	38.3376	40.104	44.9388	39.1603	37.2037	47.5635	39.724
6144	56217	Mpp5	297.513	82.617	19.5173	103.775	178.042	157.152	129.635	173.632	273.477	165.927	188.661	167.969	291.83	338.549	266.671	273.46	194.711	200.408	196.358	227.843	344.435	351.181	403.832	348.277	474.386	387.461	455.883	405.639	605.955	620.493	622.1	573.019
4106	29858	Pmm1	1084.44	647.167	968.057	745.643	1619.61	1653.83	1481.96	1575.71	618.922	612.159	693.888	645.437	1657.09	1781.23	1493.36	1810.91	621.83	608.848	604.495	606.631	1359.41	1533.24	1290.15	1359.51	557.051	520.386	504.213	475.577	1371.3	1467.44	1289.5	1442.98
201	26379	Esrra	245.724	184.511	460.608	249.829	132.096	119.735	144.366	186.654	161.927	201.368	188.661	177.301	215.701	273.147	250.261	315.998	277.022	265.517	255.203	262.873	335.098	336.645	298.413	322.025	232.34	226.883	222.457	225.289	264.848	293.424	244.612	292.634
4895	108115	Slco4a1	51.6859	66.0936	62.4553	23.0611	126.352	112.251	50.0862	117.202	64.7709	38.6627	89.534	55.9897	98.9685	150.039	86.1554	88.1149	15.2172	18.4211	11.643	12.5313	19.3658	23.1258	21.8109	19.9516	21.6057	22.9397	19.8806	13.3923	40.5344	29.763	36.9938	45.3516
2859	71988	Esco2	138.219	107.402	39.0346	78.7922	149.325	194.569	164.99	138.905	71.9677	127.265	134.301	118.2	210.625	196.204	160.003	197.499	94.0699	92.1053	105.731	101.105	146.281	138.424	158.625	159.612	119.614	120.983	102.488	123.805	162.481	191.518	186.856	191.999
3197	15220	Foxq1	12.2922	24.7851	39.0346	26.9047	11.4866	0	2.94624	8.68159	3.59838	8.05472	12.7906	6.22108	10.1506	3.84714	4.10264	6.07689	25.2467	26.9964	22.3421	27.3411	14.8702	13.5451	8.59217	9.80077	8.14128	8.79879	5.82707	11.3091	7.90077	9.05829	8.30473	4.30344
8875	223978	Cpped1	564.119	402.069	366.925	401.648	867.236	800.725	757.185	794.366	370.633	365.684	367.729	381.041	746.07	784.817	767.193	793.035	363.137	352.859	362.823	355.434	684.375	748.944	686.713	726.307	364.166	326.184	328.03	329.154	718.283	732.104	690.048	752.77
9	269261	Rpl12	11744.9	7854.12	8216.78	8192.47	3750.36	3846.47	3453	3702.7	8276.28	7872.68	7994.1	7788.79	5976.18	5497.57	6047.29	5560.36	14933.9	15568.7	15614.9	15125.6	15797.7	17061.9	15331.4	16533.9	16715.9	16876.4	16735	15755.6	19300.6	20412.2	18759.6	19539.6
8301	226122	Ubtd1	112.906	24.7851	78.0691	32.6699	97.6358	37.417	94.2798	82.4751	111.55	78.9362	70.3481	57.545	134.496	230.829	205.132	197.499	45.3057	53.9928	58.2152	52.9734	112.737	134.79	107.072	109.909	106.15	112.813	113.799	100.294	205.42	241.015	218.943	192.993
711	100037258	Dnajc3	516.431	322.206	195.173	269.047	545.612	404.104	509.7	668.483	295.067	307.69	294.183	357.712	451.702	607.849	422.572	537.805	485.221	482.759	462.261	502.678	636.652	664.04	619.298	701.105	509.769	543.011	469.936	537.479	733.741	787.101	737.989	947.418
3744	20300	Ccl25	28.731	24.7851	15.6138	21.1394	34.4597	52.3838	41.2474	26.0448	10.7951	25.7751	12.7906	21.7738	22.8389	34.6243	24.6158	9.11534	25.9384	33.9837	30.8383	40.7269	39.4233	39.3138	33.0468	40.2531	25.9895	28.2818	22.28	29.1656	36.0687	27.1749	34.3514	25.8206
6832	67300	Cltc	3478.21	3032.04	1748.75	3559.1	4789.9	5455.4	6634.94	5673.42	3886.25	4299.61	3974.67	4620.7	6476.09	5766.87	5678.05	5678.86	1525.18	1501	1481.5	1614.55	2862.69	2683.58	3053.86	2748.76	1965.18	1912.17	1952.76	2163.61	2655.69	2832.01	2801.71	2795.58
1752	338354	Zfp780b	76.8053	27.539	15.6138	13.4523	22.9731	22.4502	50.0862	21.704	43.1806	32.2189	19.1858	40.437	63.4414	34.6243	36.9237	24.3076	121.738	131.171	126.5	122.465	117.578	105.387	103.767	120.759	102.705	125.383	109.686	123.805	125.382	119.375	125.703	131.42
3204	12301	Cacybp	2543.15	1666.11	530.87	1964.04	2992.25	3015.81	2645.73	2639.2	1766.81	1586.78	1538.07	1928.53	3463.9	3096.95	2666.71	2980.72	2260.79	2377.59	2286.13	2392.35	3299.8	3635.7	3181.42	3654.99	2012.15	1928.51	1970.58	2045.16	3131.11	3479.36	3102.57	3597.01
4224	26440	Psma1	2706.11	2519.82	1518.44	2567.47	4336.18	4781.9	4593.2	4240.96	2159.03	2331.04	2231.95	2479.1	4978.88	5116.7	4410.34	4566.79	1361.59	1481.31	1374.19	1441.96	2421.08	2660.12	2512.88	2530.7	1298.85	1307.56	1344	1283.58	2416.95	2548.62	2454.05	2620.13
4302	12226	Btg1	632.113	162.48	183.462	196.02	338.854	434.038	350.603	368.968	349.043	275.471	294.183	269.062	449.165	527.059	545.651	480.075	553.698	475.772	561.384	567.613	1027.43	941.879	873.097	920.222	884.268	800.376	885.372	784.196	1269.96	1236.13	1315.17	1274.81
1488	67089	Psmc6	1870.35	1302.6	987.575	1399.04	2371.98	2581.78	2754.74	2339.69	1712.83	1523.95	1419.75	1794.78	2801.57	2639.14	2642.1	2433.8	1248.5	1318.06	1283.25	1308.1	2149.26	2210.49	2196.62	2186.62	1279.43	1262.63	1305.95	1302.33	1973.13	2170.43	2029.37	2051.42
962	20720	Serpine2	247.308	407.577	421.573	397.805	763.857	860.592	795.486	859.478	82.7628	61.2159	99.1269	80.874	121.807	103.873	90.258	112.423	214.424	214.065	197.302	194.521	325.761	330.038	298.413	332.176	32.8782	29.2246	30.5064	26.1895	46.3741	40.7623	41.9011	53.2964
6442	16667	Krt17	27.331	13.7695	31.2277	17.2959	17.2298	37.417	55.9786	17.3632	53.9757	69.2706	44.767	51.3239	38.0648	73.0957	45.129	42.5383	4.84183	4.12886	3.77612	4.84165	3.11237	7.92883	7.60077	4.55036	26.6157	28.5961	23.6511	18.1541	20.2672	31.3805	21.8943	27.4758
7303	22183	Zrsr1	37.5602	5.5078	11.7104	11.5306	5.74328	37.417	11.785	21.704	25.1887	28.997	31.9764	23.329	43.1401	53.86	61.5396	60.7689	22.4799	18.4211	18.5659	22.2147	26.628	27.0902	21.15	38.153	48.8477	46.1937	42.5034	43.4507	92.4047	78.9366	97.3919	85.7377
3411	18218	Dusp8	18.9033	13.7695	27.3242	19.2176	28.7164	67.3507	32.4087	21.704	28.7871	25.7751	31.9764	17.108	10.1506	7.69429	0	9.11534	20.059	22.2323	17.9366	17.373	16.5993	19.4917	20.8195	26.252	15.6563	16.9691	11.3114	11.3091	7.90077	7.76425	5.28483	7.94481
2414	56869	Zfp109	30.4293	11.0156	3.90346	17.2959	28.7164	29.9336	17.6775	17.3632	10.7951	17.7204	6.39528	23.329	20.3012	7.69429	12.3079	9.11534	41.1556	47.0055	49.4043	47.5621	41.4982	35.019	38.9953	42.0033	44.777	56.8779	39.4184	53.2718	36.4123	42.0564	47.941	46.3447
2162	102423	Hinfp	151.307	74.3553	101.49	80.714	155.069	172.118	176.775	160.609	53.9757	70.8815	95.9292	63.766	91.3555	119.261	114.874	100.269	164.276	162.614	172.758	158.351	236.194	247.776	244.877	252.37	166.27	159.007	162.13	154.756	192.023	197.018	180.439	208.22
1383	71834	Zbtb43	193.376	82.617	42.938	73.0269	103.379	179.602	162.043	108.52	111.55	99.8785	124.708	111.979	111.657	138.497	131.284	182.307	178.456	186.116	171.499	173.445	240.69	241.169	232.65	242.919	271.793	279.676	281.071	255.05	365.84	358.773	377.11	374.399
2804	245174	Zfp937	28.5918	8.2617	0	15.3741	0	7.48341	20.6237	30.3856	7.19677	20.9423	9.59292	7.77634	10.1506	3.84714	12.3079	6.07689	38.043	39.7006	43.1107	45.2837	29.0488	33.0368	41.639	32.5525	50.4133	49.0218	52.1009	61.9024	37.7863	60.4965	56.2457	55.9447
896	271457	Rab5a	598.914	289.16	117.104	324.778	396.287	516.355	601.034	520.896	460.593	412.402	450.867	461.915	723.231	673.25	635.909	507.421	513.58	495.146	542.188	546.822	731.406	703.023	789.819	717.556	698.584	671.222	743.123	671.403	897.253	926.858	929.375	897.763
5113	17874	Myd88	206.192	159.726	187.366	153.741	327.367	314.303	309.356	355.945	161.927	188.48	153.487	147.751	329.895	311.619	320.006	425.383	116.896	102.586	116.116	105.662	189.509	203.837	194.646	185.865	107.089	122.869	107.629	113.389	211.603	232.281	204.221	231.392
38	67891	Rpl4	20989.5	27819.9	22300.4	28670.8	15219.7	13649.7	13732.4	14407.1	20507.2	19448.9	20170.7	19674.2	15776.6	13507.3	14063.8	13378.3	24568.5	25352.8	24758.5	24630.6	30486.7	32922.8	30012.1	31493.4	16390.3	16477	16705.2	16444.9	21733	22597.5	21415.6	22360
2553	108664	Atp6v1h	548.482	481.933	281.049	578.45	867.236	845.625	986.992	959.316	464.191	554.165	585.168	625.218	786.673	819.441	808.22	777.842	291.893	330.626	325.376	325.815	495.904	543.125	541.307	522.941	308.429	319.899	309.52	310.405	471.298	532.498	473.37	479.006
45	68052	Rps13	6973.4	12205.3	16058.8	12593.3	6782.82	6450.7	6098.73	6598.01	12212.9	12136.9	12039.1	11155.9	9216.76	8286.75	8406.31	8094.42	3976.53	4158.71	4135.8	3910.92	4369.07	4518.11	4318.23	4621.76	3841.74	3768.4	3889.06	3660.87	4550.84	4699.96	4625.36	4793.37
8090	77832	Tchp	66.2013	57.8319	35.1311	42.2787	86.1492	104.768	82.4948	95.4975	39.5822	33.8298	38.3717	41.9923	63.4414	65.4014	28.7185	72.9227	62.598	53.9928	55.3832	54.1126	93.371	103.405	107.072	105.008	57.9283	62.5343	58.6135	53.867	75.5726	76.3485	75.4976	68.524
6403	18045	Nfyb	403.864	214.804	148.331	222.924	287.164	389.137	377.119	512.214	129.542	109.544	70.3481	163.303	304.518	361.631	295.39	425.383	394.263	451.316	377.298	468.216	650.485	773.392	690.348	843.216	273.985	317.385	279.357	328.856	637.558	655.432	619.835	747.474
3962	26903	Dysf	47.9311	27.539	27.3242	26.9047	51.6895	67.3507	44.1937	39.0672	79.1644	69.2706	92.7316	71.5424	76.1296	76.9429	65.6422	130.653	22.1341	18.7387	13.8458	17.373	21.7866	24.1169	17.5148	22.7518	44.4639	52.4785	41.4751	44.9388	43.626	53.7027	44.1661	56.6067
13	22608	Ybx1	7490.36	6926.06	7295.56	6314.91	4129.42	3861.44	3688.7	3889.35	6214.41	5870.28	5710.99	5757.61	4260.72	4139.53	4722.14	4390.56	9017.91	9383.63	9334.89	8869.91	11914.5	12972.2	11330.4	11906.9	7140.21	7318.08	7168.33	7250.02	10117.8	10515.4	10158.2	10631.1
3921	66358	Adprm	85.026	52.3241	35.1311	67.2616	109.122	164.635	97.2261	86.8159	50.3774	51.5502	67.1505	73.0976	134.496	107.72	123.079	97.2303	49.8017	67.9674	68.5996	65.5047	89.567	103.736	99.4709	85.0566	65.4434	76.361	65.1261	60.1167	95.1528	113.229	112.491	100.965
8599	26908	Eif2s3y	195.542	0	0	0	0	0	0	0	327.453	336.687	332.555	413.702	436.476	284.689	356.929	401.075	0	0	0	0	0	0	0	0	373.873	369.864	387.329	368.736	418.397	434.475	421.654	397.902
2647	192159	Prpf8	1968.53	1756.99	1947.82	1754.57	2774.01	3457.33	4080.55	3893.69	1917.94	2047.51	1701.15	1889.65	2255.97	2277.51	2260.55	2725.49	1196.97	1228.81	1181.61	1219.81	1864.65	1937.61	2141.1	2166.32	1297.28	1248.49	1231.23	1330.01	1473.67	1496.88	1602.06	1667.09
4727	67488	Calcoco1	35.5523	46.8163	39.0346	26.9047	40.203	134.701	67.7636	60.7711	39.5822	43.4955	54.3599	40.437	68.5167	34.6243	16.4106	82.0381	13.8338	13.0218	15.7338	8.5441	15.216	17.8399	21.8109	16.8013	15.9694	22.6255	24.6794	21.1301	21.6412	27.8219	22.6493	27.1448
10137	226049	Dmrt2	20.6373	22.0312	27.3242	13.4523	40.203	44.9004	47.1399	4.3408	7.19677	8.05472	12.7906	15.5527	10.1506	26.93	32.8211	24.3076	13.1421	15.8802	14.1605	17.6578	23.8615	25.108	30.0726	28.0022	10.9594	11.9412	12.6825	11.3091	21.6412	23.2928	20.0069	22.8413
6765	20844	Stam	740.485	415.839	441.091	484.284	769.6	883.042	931.013	915.908	716.078	612.159	700.283	684.318	1081.04	1050.27	1078.99	1026.99	439.223	433.213	439.918	470.78	817.169	835.17	832.119	839.366	564.879	568.151	624.525	617.833	878.703	934.298	923.335	945.432
7727	71648	Optn	6.33818	0	3.90346	1.92176	0	7.48341	0	4.3408	0	8.05472	19.1858	4.66581	2.53765	15.3886	16.4106	9.11534	0.69169	2.22323	2.83209	0.569606	4.14982	4.29478	3.30468	2.45019	11.2725	5.34212	8.56923	7.7378	11.3359	11.9699	15.477	11.2551
5925	239017	Ogdhl	20.1929	19.2773	35.1311	28.8264	63.1761	37.417	47.1399	43.408	28.7871	22.5532	31.9764	13.9974	25.3765	11.5414	36.9237	18.2307	16.2547	7.30491	10.0697	10.5377	13.1411	12.554	15.2015	17.8514	8.76753	6.28485	6.85538	9.22584	6.52672	8.41127	5.28483	7.94481
1208	217430	Pqlc3	191.027	167.988	152.235	140.289	327.367	291.853	262.216	325.56	172.722	159.483	159.882	127.532	218.238	146.191	192.824	209.653	145.947	161.026	165.205	169.743	223.053	255.374	204.229	214.217	143.099	134.182	135.394	131.543	201.298	187.313	182.327	213.848
3024	56501	Elf4	351.039	278.144	304.47	249.829	516.895	546.289	512.647	564.304	399.42	383.405	319.764	311.054	507.531	573.224	644.114	604.651	200.244	181.035	166.149	202.21	340.631	292.706	299.735	296.473	228.582	234.111	222.457	226.479	335.268	330.304	322.752	287.337
3959	12192	Zfp36l1	329.113	341.484	605.036	357.448	798.316	868.075	742.454	924.59	392.224	438.177	406.1	345.27	413.638	627.084	447.188	680.612	99.6034	81.942	93.1444	96.8331	159.422	151.639	123.595	154.362	100.2	96.4725	80.8935	96.7225	116.107	125.522	110.226	128.11
1728	23853	Def6	369.349	319.452	429.38	276.734	689.194	673.507	574.518	672.823	212.305	238.42	175.87	220.848	362.885	361.631	332.314	315.998	336.162	346.189	302.405	304.455	475.501	534.535	474.883	504.739	207.289	254.537	222.114	248.8	353.474	342.598	331.057	355.199
3379	69723	Rpain	45.36	30.2929	19.5173	24.9829	74.6627	29.9336	35.3549	43.408	28.7871	45.1064	51.1623	38.8817	83.7426	53.86	77.9501	57.7305	32.1636	25.4084	34.2998	34.746	41.4982	28.0813	32.3859	42.3533	43.8377	50.2788	45.931	40.4746	61.4886	59.5259	69.4578	68.855
8298	71740	Nectin4	24.3286	5.5078	11.7104	5.76528	0	14.9668	20.6237	8.68159	35.9838	35.4408	35.1741	21.7738	32.9895	46.1657	20.5132	27.346	11.4129	7.62251	11.643	8.8289	18.6742	12.8844	12.5578	12.251	61.3727	50.9073	57.5852	33.9273	30.229	45.2915	27.5566	28.7999
1723	56480	Tbk1	460.263	324.96	226.4	319.012	585.815	546.289	598.088	581.667	489.38	410.791	431.682	387.262	601.424	592.46	557.959	486.151	337.891	315.381	347.089	348.599	519.074	551.715	547.255	536.942	424.912	391.232	382.873	370.819	522.482	520.528	508.854	503.171
4662	94275	Maged1	1299.64	1040.97	1467.7	1270.28	2010.15	2544.36	2412.97	2799.81	1450.15	1349.97	1339.81	1273.77	1882.94	2389.08	2244.14	2764.99	519.459	517.378	541.244	543.689	830.31	943.861	970.916	915.321	597.758	615.601	574.824	594.025	897.596	1020.68	911.256	1053.68
6050	73327	Pradc1	58.1198	44.0624	66.3588	48.044	120.609	82.3175	85.4411	112.861	46.779	32.2189	19.1858	34.2159	55.8284	84.6371	45.129	75.9612	40.8097	51.7695	35.5585	38.1636	68.4721	68.3862	60.4757	72.8057	33.5045	40.5373	32.5631	33.6297	62.8627	78.9366	57.7556	71.8343
1025	319179	H2bc6	634.918	245.097	234.207	286.342	562.842	531.322	477.292	464.465	230.297	214.256	290.985	269.062	271.529	296.23	303.595	230.922	916.49	924.865	897.144	810.265	1289.21	1206.5	1343.35	1259.75	759.331	763.924	810.992	765.149	827.864	763.485	774.605	661.074
5167	59025	Usp14	2048.32	2208.63	882.181	2290.74	3158.81	3262.77	4054.03	3450.93	2123.05	2242.43	2142.42	2522.65	3598.39	3039.24	3064.67	2919.95	1052.75	1078.59	1128.75	1143.48	1789.61	1789.93	1875.74	1749.44	1082.79	1094.19	1144.51	1149.36	1613.13	1642.46	1583.18	1619.09
1725	20301	Ccl27a	19.8454	8.2617	7.80691	13.4523	34.4597	22.4502	8.83873	17.3632	17.9919	25.7751	19.1858	24.8843	27.9142	7.69429	8.20528	18.2307	30.7802	27.6316	27.0622	26.7715	14.8702	20.8132	22.4718	16.4513	24.1107	20.74	24.6794	24.4038	14.4275	21.3517	21.8943	14.2344
3829	19181	Psmc2	1757.29	1660.6	1760.46	1889.09	3537.86	3434.88	3352.83	3446.59	1525.71	1646.38	1710.74	1614.37	3022.35	3027.7	3183.65	3263.29	744.605	739.066	769.071	792.323	1325.52	1402.74	1353.6	1428.46	707.352	693.533	727.699	740.745	1231.49	1283.37	1218.91	1241.04
2174	619331	Zfp551	22.5718	5.5078	11.7104	19.2176	17.2298	37.417	14.7312	30.3856	21.5903	16.1094	22.3835	10.8869	17.7636	11.5414	24.6158	12.1538	29.3968	23.5027	22.9714	30.1891	22.1324	23.1258	22.1414	18.5514	25.9895	32.9955	24.3366	28.2727	31.2596	31.3805	26.8016	33.4344
10077	22592	Ercc5	466.645	371.777	257.628	359.369	689.194	538.805	698.26	638.097	284.272	304.468	284.59	353.046	433.939	407.797	480.009	470.959	365.904	368.421	352.438	372.238	715.499	714.256	679.443	698.305	325.651	327.441	314.662	338.975	587.405	568.084	563.589	601.488
1430	71960	Myh14	159.079	90.8787	105.393	57.6528	132.096	74.8341	114.904	91.1567	287.871	367.295	348.543	270.617	286.755	365.479	303.595	361.575	38.3888	32.7133	24.5448	28.4803	57.0601	66.0736	83.6085	64.405	150.301	161.206	146.705	121.424	160.077	198.635	165.717	173.462
8765	15015	H2-Q4	10.1095	2.7539	0	3.84352	11.4866	0	2.94624	4.3408	14.3935	14.4985	12.7906	4.66581	10.1506	19.2357	4.10264	0	10.0295	8.57532	9.44031	6.55047	12.1037	9.91104	13.5492	11.5509	20.3532	14.7694	12.6825	14.5828	19.9237	16.8225	17.7419	9.59997
2726	67263	Zswim6	92.2857	85.3709	54.6484	71.1052	137.839	142.185	114.904	169.291	64.7709	85.38	57.5575	88.6503	147.184	119.261	147.695	82.0381	71.59	72.4138	69.5436	67.4984	93.7168	103.736	95.1749	103.958	70.4534	77.9322	57.5852	69.3426	83.8169	73.1134	89.0871	94.0135
139	70021	Nt5dc2	301.153	272.636	394.249	311.325	155.069	82.3175	147.312	156.269	313.059	299.636	268.602	251.954	200.475	207.746	147.695	173.191	385.963	359.528	355.27	384.484	380.055	408.665	357.236	364.378	343.812	383.69	341.741	339.273	405.344	407.623	375.978	361.158
5928	21808	Tgfb2	7.5694	8.2617	3.90346	9.60881	22.9731	7.48341	14.7312	8.68159	0	8.05472	3.19764	12.4422	15.2259	15.3886	4.10264	9.11534	6.9169	6.03449	4.40548	8.25929	4.49564	6.60736	8.26171	8.75068	7.2019	4.3994	2.05661	4.46411	4.80917	4.85266	5.66232	4.30344
7623	630146	Cd101	7.84729	0	3.90346	3.84352	0	7.48341	0	13.0224	17.9919	8.05472	3.19764	6.22108	7.61296	3.84714	16.4106	9.11534	4.49599	3.17605	3.46145	3.13284	5.5331	2.64294	3.96562	3.8503	10.02	9.74152	13.7108	13.3923	11.3359	16.499	17.7419	19.862
8938	654470	Tctn1	47.6929	41.3085	19.5173	59.5746	57.4328	52.3838	117.85	82.4751	17.9919	48.3283	28.7788	51.3239	83.7426	61.5543	77.9501	60.7689	27.6676	21.2795	23.9155	20.221	41.1524	51.5374	46.9265	50.754	23.4845	34.5667	32.2203	24.1062	51.1833	56.9378	48.3184	63.2274
2046	245305	B230307C23Rik	31.1459	8.2617	7.80691	19.2176	11.4866	44.9004	23.57	17.3632	28.7871	25.7751	3.19764	18.6632	10.1506	11.5414	24.6158	15.1922	50.4934	52.7224	43.4254	44.1445	39.0775	35.6797	39.3257	37.803	46.3427	48.0791	45.931	50.8909	29.542	41.7329	43.7886	46.0137
3853	73244	Prl8a1	97.7456	8.2617	3.90346	21.1394	22.9731	29.9336	14.7312	30.3856	255.485	235.198	182.266	247.288	261.378	196.204	201.029	203.576	17.2923	20.9619	20.7687	15.0946	18.3284	18.5006	21.15	18.2014	128.695	111.87	115.513	123.805	124.008	132.639	114.001	115.531
7040	67374	Jam2	10.4781	0	0	5.76528	5.74328	0	5.89249	4.3408	7.19677	22.5532	22.3835	15.5527	10.1506	34.6243	12.3079	3.03845	4.49599	3.81125	6.60822	2.84803	3.804	4.62515	4.29609	5.25041	19.7269	18.8546	19.8806	25.2967	17.5191	10.6758	16.987	10.5931
4393	14391	Gabpb1	338.978	264.374	214.69	242.142	499.666	591.189	374.173	486.169	219.501	165.927	211.044	259.73	317.207	392.409	324.108	385.883	275.639	303.312	282.58	303.6	474.117	502.49	488.432	510.34	228.269	245.109	217.316	246.717	367.214	361.361	367.296	386.316
2835	53382	Txnl1	2767.55	2043.39	1253.01	2504.05	3727.39	3764.15	3971.54	3555.11	2385.73	2198.94	2196.78	2684.39	4491.65	3897.16	3991.87	3564.1	1821.91	1929.13	1957.92	1981.66	2885.86	3118.01	3067.08	3058.89	1849.95	1790.24	1883.86	1897.84	3096.76	3229.93	2930.82	3065.04
410	56468	Socs5	112.676	118.418	101.49	117.227	51.6895	37.417	55.9786	13.0224	104.353	64.4378	57.5575	51.3239	76.1296	50.0129	82.0528	42.5383	178.456	202.632	172.758	183.983	153.198	152.96	143.423	161.363	138.715	145.494	139.85	155.054	141.183	124.552	136.651	139.034
1693	237422	Ric8b	124.317	71.6014	39.0346	65.3399	160.812	127.218	82.4948	130.224	82.7628	82.1581	63.9528	87.0951	106.581	96.1786	131.284	97.2303	122.429	132.441	120.521	135.566	169.105	157.255	170.852	165.213	126.503	126.011	119.969	139.578	196.832	177.931	184.592	185.048
117	117146	Ube3b	703.054	346.991	355.215	305.56	149.325	157.152	150.258	160.609	341.846	344.742	415.693	304.833	301.981	288.536	295.39	325.114	1136.79	1108.12	1119.62	1074.56	1257.05	1248.46	1114.01	1120.09	961.297	1008.72	1007.74	970.499	1126.38	1073.41	1117.36	1107.31
2725	13121	Cyp51	890.422	457.148	355.215	493.893	654.734	725.89	966.368	976.679	899.596	987.509	965.688	1026.48	1497.22	1715.83	1641.06	1832.18	388.73	394.782	406.563	435.464	571.984	614.815	689.687	693.054	718.937	799.119	773.287	846.099	1135.99	1308.6	1281.19	1349.29
1249	108900	Fam72a	40.8239	33.0468	15.6138	32.6699	34.4597	52.3838	50.0862	60.7711	43.1806	33.8298	38.3717	37.3265	53.2907	19.2357	41.0264	30.3845	47.0349	41.6062	49.4043	49.271	44.6106	36.3405	41.3085	41.6533	59.1808	50.2788	48.3304	43.7483	39.8474	34.9391	30.199	32.1103
5570	100504425	Tincr	22.1628	2.7539	0	3.84352	11.4866	0	5.89249	0	43.1806	20.9423	12.7906	17.108	17.7636	42.3186	57.4369	15.1922	10.0295	13.0218	8.81096	14.8098	6.57055	11.2325	6.93983	12.251	49.1608	48.0791	45.931	38.689	38.4733	47.8796	43.4111	41.0482
5310	232714	Mgam	7.95049	5.5078	0	1.92176	0	7.48341	2.94624	8.68159	10.7951	11.2766	6.39528	7.77634	12.6883	15.3886	12.3079	9.11534	7.95444	6.9873	7.86692	8.25929	8.64546	3.30368	6.2789	4.90038	8.4544	12.8839	15.7674	11.9043	7.21375	8.41127	9.05971	6.28964
6313	18779	Pla2r1	14.3546	2.7539	0	3.84352	5.74328	0	2.94624	8.68159	32.3854	17.7204	19.1858	15.5527	27.9142	15.3886	41.0264	24.3076	5.18768	5.08167	5.66419	7.40488	6.22473	6.60736	5.61796	2.80022	26.6157	24.8252	23.6511	25.8919	21.2977	20.3812	20.7618	19.531
71	20054	Rps15	10167.3	17536.8	23389.5	17224.7	9574.05	9346.78	7568.9	8464.55	17498.9	16180.3	16461.5	14933.7	11295.1	10760.5	11360.2	11175.4	7095.36	6974.6	7219.01	6670.66	7190.95	7599.13	6683.06	7377.53	6466.68	6412.75	6456.05	5767.64	7647.95	7886.22	7445.19	7522.08
9385	241062	Pgap1	33.6323	24.7851	27.3242	19.2176	51.6895	29.9336	47.1399	26.0448	35.9838	27.386	9.59292	32.6606	55.8284	38.4714	41.0264	48.6151	28.7051	26.9964	17.6219	20.7906	38.3859	44.9301	36.021	51.804	26.3026	24.8252	20.2234	19.9397	39.5039	41.4093	35.4839	53.9585
5899	223780	Adm2	208.703	344.238	503.546	334.386	723.654	733.374	654.066	872.5	125.943	127.265	166.277	99.5372	96.4309	173.121	151.798	221.807	85.4238	66.3794	93.4591	78.0361	126.57	128.513	138.466	134.41	30.0601	31.7385	40.4467	33.6297	27.8245	52.4087	35.1064	39.393
2679	16164	Il13ra1	60.5505	13.7695	23.4207	24.9829	40.203	29.9336	44.1937	26.0448	57.5741	49.9393	44.767	35.7712	65.979	80.79	28.7185	39.4998	44.9599	54.628	53.1804	56.391	54.9852	47.573	60.8062	49.7039	110.22	111.242	107.287	96.1273	99.9619	107.082	114.379	102.951
2491	52440	Tax1bp1	2345.79	1644.08	968.057	1921.76	2802.72	3202.9	2887.32	2847.56	1763.21	1694.71	1694.75	1829	2621.4	2308.29	2449.27	2278.83	1991.03	1917.06	2057.04	2045.17	3053.58	3093.24	3399.86	3084.79	2059.74	2022.47	2043.93	2028.2	2739.85	2824.57	2733.39	2711.83
662	102414	Clk3	361.843	374.53	417.67	336.308	712.167	606.156	712.991	750.958	392.224	304.468	306.974	298.612	383.186	465.504	475.906	467.921	237.941	232.487	222.477	242.652	334.407	335.324	315.597	333.226	233.592	207.4	233.083	208.028	284.084	246.515	289.533	255.227
3931	110208	Pgd	3225.64	3070.6	3540.44	3316.96	6306.12	6607.85	5977.93	6372.29	3789.1	3916.2	3942.69	3838.4	6163.96	6374.72	6367.29	6626.85	928.94	989.021	924.836	939.851	1860.5	1900.94	1940.84	1915	1156.69	1113.36	1140.39	1157.1	1997.86	2025.82	1908.96	1883.25
6987	68724	Arl8a	237.947	134.941	136.621	169.115	367.57	276.886	309.356	195.336	305.863	278.693	246.218	245.733	482.154	400.103	480.009	364.614	108.941	99.7278	115.172	124.174	187.088	218.704	192.993	186.565	176.29	164.349	162.473	155.351	284.771	273.366	270.659	262.51
3028	22712	Zfp54	38.4647	16.5234	0	5.76528	11.4866	0	14.7312	21.704	10.7951	16.1094	6.39528	26.4396	12.6883	7.69429	8.20528	6.07689	57.0645	62.8857	68.5996	83.7321	44.9564	54.5107	59.1538	54.9543	67.009	76.6752	62.0412	69.9378	63.5497	61.1435	69.0803	72.4964
8292	64209	Herpud1	685.93	845.448	1163.23	607.277	1257.78	1646.35	1552.67	2140.01	291.469	486.505	316.566	584.781	268.991	661.709	422.572	686.689	570.645	566.607	493.728	578.151	865.238	863.912	853.6	1132.69	178.482	269.62	233.083	390.759	228.435	355.862	251.784	499.199
8664	16858	Lgals7	23.0747	22.0312	19.5173	19.2176	34.4597	67.3507	35.3549	13.0224	25.1887	70.8815	41.5693	59.1002	32.9895	92.3314	24.6158	48.6151	3.11261	1.58802	3.14677	3.41764	2.07491	3.30368	5.94843	5.60044	13.1513	11.627	9.25476	8.92823	10.3054	13.911	6.41729	7.28274
2844	108000	Cenpf	1318.29	917.049	425.477	966.646	1131.43	1601.45	1635.17	1554.01	863.612	1071.28	924.118	1141.57	974.459	915.62	820.528	917.611	1312.14	1371.1	1309.37	1340.57	1970.13	1909.53	2098.14	1941.6	1558.43	1518.11	1559.94	1749.34	1214.31	1323.8	1390.29	1440.33
8943	94089	Trim7	132.959	88.1248	121.007	53.8093	160.812	157.152	117.85	195.336	86.3612	95.0457	76.7434	63.766	185.249	161.58	114.874	182.307	106.52	105.445	80.5573	101.96	161.497	180.051	173.165	199.166	103.332	115.956	99.403	96.4249	191.68	178.901	168.36	199.282
156	84652	Fam126a	381.864	283.652	253.725	290.186	109.122	82.3175	129.635	104.179	345.445	330.243	271.8	303.277	225.851	219.287	221.542	227.883	523.61	606.307	535.266	618.877	513.886	527.598	499.338	546.743	528.557	549.296	574.138	593.727	455.497	441.268	443.548	481.985
4563	17076	Ly75	18.5752	5.5078	0	1.92176	0	0	8.83873	4.3408	25.1887	32.2189	28.7788	37.3265	50.7531	26.93	20.5132	24.3076	7.26275	4.76407	3.14677	5.12646	3.45819	3.30368	3.63515	2.10016	26.3026	34.8809	27.0788	45.534	35.3817	38.4977	33.9739	34.7585
2178	432467	Hnrnph3	39.0444	16.5234	19.5173	32.6699	28.7164	44.9004	47.1399	43.408	43.1806	22.5532	15.9882	23.329	32.9895	23.0829	20.5132	30.3845	59.1395	43.5118	50.9777	53.8278	48.4146	51.207	46.9265	53.5542	49.4739	39.5946	47.9877	41.6651	49.1222	49.1736	46.8085	34.0965
3187	74154	Unkl	72.605	52.3241	81.9726	42.2787	68.9194	52.3838	126.689	125.883	43.1806	56.383	35.1741	46.6581	73.592	76.9429	73.8475	78.9996	76.4318	67.0146	70.173	66.644	96.1376	99.4408	99.1405	99.0577	55.1102	56.5637	55.8714	57.7359	75.2291	77.966	84.5573	78.455
2787	72615	Anks3	93.1337	57.8319	78.0691	63.4181	91.8925	104.768	153.205	117.202	71.9677	40.2736	57.5575	51.3239	76.1296	65.4014	114.874	72.9227	85.0779	95.9166	93.7737	82.8777	118.616	132.808	113.681	127.41	100.513	91.4446	93.2332	91.3655	104.428	132.316	107.207	99.6411
6137	20867	Stip1	5146.46	5136.02	3938.59	4815.93	8758.51	9286.91	7895.94	9254.58	4444	4349.55	4166.53	4398.3	7506.38	8475.26	7466.8	9324.99	2851.15	2956.58	2804.4	2894.74	4802.73	5508.89	4689.68	5313.76	2686.93	2471.52	2559.11	2596.03	4312.45	4711.28	4076.49	5086.33
1129	170459	Stard4	500.339	201.035	171.752	255.594	379.057	314.303	438.99	455.784	377.83	501.004	406.1	489.91	609.037	704.027	615.396	647.189	358.987	335.39	318.768	391.32	444.031	448.64	479.179	502.989	566.445	643.255	606.701	683.01	693.207	785.16	808.201	878.232
5890	71323	Rassf8	159.325	38.5546	27.3242	26.9047	68.9194	44.9004	67.7636	43.408	115.148	67.6596	92.7316	77.7634	116.732	130.803	131.284	112.423	123.813	88.9293	97.2352	86.2954	159.768	132.808	159.286	143.861	330.348	290.989	307.464	281.537	415.649	365.243	409.197	384.33
3777	14260	Fmn1	73.6309	49.5702	81.9726	61.4964	137.839	112.251	111.957	112.861	35.9838	35.4408	35.1741	54.4344	58.366	84.6371	61.5396	75.9612	54.6435	49.8639	61.9914	54.6822	93.0252	74.3328	78.321	75.2559	60.1202	51.85	49.3587	63.688	96.8703	103.2	99.2793	106.593
8314	56696	Gpr132	46.0874	27.539	27.3242	19.2176	63.1761	74.8341	26.5162	39.0672	28.7871	40.2736	38.3717	37.3265	91.3555	100.026	86.1554	82.0381	19.7132	20.3267	17.3072	22.4995	37.6942	45.9212	41.639	42.0033	28.8076	31.4243	28.7926	32.7368	71.107	71.8193	68.7028	66.2067
1155	59048	C1galt1c1	252.882	181.757	156.138	184.489	292.907	254.436	368.281	364.627	237.493	238.42	214.242	284.614	383.186	503.976	365.135	385.883	137.992	166.742	151.674	167.179	213.716	219.695	214.143	207.216	196.33	198.601	206.69	189.278	276.527	315.423	283.493	279.061
2737	77827	Krba1	28.4175	13.7695	50.7449	19.2176	28.7164	59.8673	20.6237	73.7935	3.59838	20.9423	25.5811	10.8869	38.0648	26.93	41.0264	18.2307	27.6676	24.7732	27.3769	27.9107	25.5906	22.7954	29.4117	31.8525	25.9895	25.1394	19.8806	24.7014	23.0153	28.7924	33.5964	30.4551
79	20090	Rps29	5390.48	7523.66	9949.91	7754.31	4370.64	3943.76	3096.5	3281.64	8801.64	8583.11	8512.12	7721.91	6300.99	6255.45	5678.05	5873.32	4225.88	4184.12	4169.16	3930.85	4032.94	4252.5	3881.68	4220.98	4279.81	4158.69	4309.63	3962.35	4799.55	5064.23	4899.41	5086
1316	382245	Tmem29	65.5335	24.7851	11.7104	24.9829	22.9731	14.9668	32.4087	69.4527	21.5903	45.1064	31.9764	18.6632	30.4518	19.2357	32.8211	24.3076	104.445	119.737	98.1792	118.763	88.5296	90.8512	92.2006	92.4072	95.5035	87.3594	98.3747	88.3895	108.893	108.376	101.544	112.551
834	208994	Fam83b	266.569	176.25	70.2622	161.428	235.475	202.052	306.409	295.174	381.429	272.25	284.59	321.941	357.809	323.16	438.982	361.575	186.411	175	169.926	164.047	231.007	210.775	226.04	207.216	314.065	295.702	288.612	292.548	354.848	303.129	347.666	307.861
5483	269198	Nbeal1	200.276	33.0468	27.3242	82.6357	109.122	97.2843	100.172	99.8383	86.3612	112.766	86.3363	97.9819	114.194	123.109	106.669	115.461	200.59	191.833	191.953	199.932	329.911	281.804	304.031	311.524	330.661	320.213	310.206	348.499	363.436	339.686	402.025	389.958
1699	18701	Pigf	152.005	126.679	81.9726	128.758	229.731	224.502	188.56	251.766	143.935	112.766	134.301	160.193	281.68	196.204	246.158	236.999	108.941	103.539	113.913	98.2571	136.944	147.344	133.179	161.013	101.14	88.6164	102.145	106.246	141.87	134.257	147.22	143.338
22	27050	Rps3	14429	19511.4	21695.4	19375.2	11205.1	11270	9519.32	10166.1	18722.4	17604.4	19221	16803.1	14949.3	13676.6	14084.4	14475.2	12272	12932.5	12859.9	12604.8	14690.7	15712.3	14374.7	15152.7	11758.5	11528	11552.7	11114.5	14233.1	15075.9	14218.8	14938.9
2503	20274	Scn9a	20.3882	8.2617	19.5173	21.1394	22.9731	29.9336	29.4624	30.3856	0	0	0	4.66581	0	0	8.20528	0	54.6435	51.7695	57.5859	65.2199	52.9102	46.2515	60.4757	48.3038	2.19188	3.14243	3.77046	2.67847	2.06107	1.61755	1.88744	2.9793
3906	22230	Ufd1	522.698	448.886	417.67	557.311	867.236	785.758	922.175	1024.43	417.412	444.62	342.148	452.583	817.125	765.581	861.554	926.726	268.722	265.2	280.692	263.728	534.981	565.59	576.337	565.294	263.965	240.71	259.819	265.168	454.81	461.002	445.813	440.606
601	103677	Smg6	343.104	220.312	199.076	226.768	338.854	411.587	433.098	425.398	251.887	230.365	207.847	195.964	266.454	288.536	361.032	340.306	359.679	333.167	332.299	330.087	445.069	477.382	465.299	437.884	329.722	329.64	349.282	341.058	430.764	427.034	424.674	425.709
5513	66146	Maco1	282.75	126.679	144.428	192.176	304.394	261.919	300.517	312.537	187.116	236.809	191.858	234.846	304.518	280.841	291.287	306.883	228.604	236.615	248.28	237.241	390.083	403.379	410.772	373.479	267.723	250.137	268.731	244.336	432.138	349.715	395.985	351.227
9682	20847	Stat2	41.6969	22.0312	19.5173	24.9829	17.2298	52.3838	35.3549	52.0896	46.779	38.6627	44.767	52.8791	76.1296	65.4014	118.976	94.1918	10.3754	13.0218	19.51	15.3794	15.9077	29.0724	33.0468	25.202	30.0601	36.4521	42.5034	36.3081	50.8398	53.7027	59.2656	60.5791
12	67025	Rpl11	7876.88	11863.8	10726.7	11757.3	5938.55	5679.91	5188.34	5360.88	10647.6	10211.8	10456.3	9928.84	9176.16	8152.1	8188.87	7650.81	6876.09	7175.96	6973.24	6920.15	7580.34	7935.44	7334.41	7612.04	6263.46	6161.67	6295.64	6083.1	7548.33	7713.14	7320.24	7462.16
1830	217365	Nploc4	1630.88	1186.93	1100.77	1212.63	2159.47	2304.89	2091.83	2270.24	1115.5	1150.21	997.664	998.483	2060.58	2250.58	2223.63	2160.34	1092.52	1061.75	1096.96	997.096	2287.59	2289.78	2178.45	2177.52	969.125	995.521	1028.31	971.094	2101.26	1956.59	2049.38	2020.63
210	75234	Rnf19b	320.916	184.511	265.435	197.941	91.8925	187.085	91.3336	125.883	284.272	225.532	259.009	245.733	203.012	207.746	180.516	212.691	361.408	303.63	342.369	324.676	435.731	425.514	413.085	389.93	568.637	510.644	547.745	427.365	545.153	469.737	491.489	428.689
7804	17756	Map2	51.0766	11.0156	39.0346	15.3741	28.7164	14.9668	23.57	60.7711	53.9757	82.1581	41.5693	49.7686	63.4414	84.6371	53.3343	51.6536	38.043	34.6189	31.7824	30.4739	51.8728	53.85	44.9437	46.2036	68.5746	76.361	58.2707	70.2354	75.2291	73.4369	85.3122	70.1791
4632	20020	Polr2a	469.205	597.596	948.54	591.902	1005.07	1481.71	1364.11	1419.44	647.709	679.818	585.168	503.907	784.135	704.027	906.683	802.15	81.2736	71.461	74.5784	67.4984	177.405	83.2527	87.2436	86.8068	97.6953	105.271	87.4061	110.115	98.2444	86.7008	114.756	93.6825
1913	330361	Gcfc2	132.667	68.8475	109.297	101.853	172.298	187.085	164.99	173.632	64.7709	127.265	73.5458	110.424	119.27	130.803	127.182	197.499	111.016	130.535	143.807	144.11	155.618	162.541	173.826	183.414	105.837	103.386	107.972	117.257	121.947	138.462	122.306	161.875
760	192176	Flna	6067.58	4689.89	4660.73	4262.47	6800.05	8186.85	9130.41	9462.94	5710.63	6118.36	5822.9	6239.74	6948.1	6974.87	6642.17	7501.92	4675.48	4647.51	4297.86	4429.54	6127.91	6613.64	6969.91	7008.6	5221.69	5269.22	5023.62	5587.58	5744.89	5817.69	5563.04	5944.7
8819	30805	Slc22a4	31.0529	19.2773	23.4207	23.0611	57.4328	22.4502	50.0862	13.0224	46.779	48.3283	31.9764	24.8843	35.5272	34.6243	57.4369	27.346	21.0966	15.245	17.3072	11.3921	34.9277	26.7598	32.7164	25.902	27.8682	22.3112	22.28	26.4871	47.4046	38.8213	43.0336	33.4344
2085	208715	Hmgcs1	1143.43	553.534	413.766	553.467	890.209	1040.19	866.196	1054.81	1324.2	1390.24	1496.5	1416.85	1898.17	2131.32	2359.02	2078.3	441.99	493.24	537.154	543.405	664.317	741.346	847.321	787.912	1071.2	1159.24	1175.35	1209.48	1448.25	1602.02	1654.91	1602.53
1696	319178	H2bc3	1670.09	1773.51	1393.53	2110.09	3101.37	3135.55	3514.87	3346.75	1561.7	1428.91	1755.51	1587.93	1910.85	1808.16	1903.62	1640.76	1281.7	1262.8	1243.92	1016.75	1719.41	1596.01	1875.74	1897.5	989.165	987.35	1079.38	959.189	1041.87	938.504	1012.04	898.425
159	56233	Hdac7	615.115	751.815	1284.24	737.956	292.907	269.403	279.893	364.627	809.636	784.53	956.095	692.095	537.983	557.836	652.319	568.189	718.32	646.325	634.389	578.72	487.258	500.177	483.475	475.337	672.595	709.874	724.271	666.344	589.123	540.586	577.556	524.688
2716	242109	Zfp697	33.4079	22.0312	35.1311	24.9829	11.4866	14.9668	5.89249	4.3408	32.3854	20.9423	35.1741	20.2185	12.6883	26.93	4.10264	12.1538	52.2226	57.4864	51.9217	55.5366	32.8528	36.6709	32.3859	47.2537	54.4839	63.7912	56.5569	68.1522	32.2901	40.1153	26.8016	43.6964
1514	27416	Abcc5	237.559	156.972	136.621	128.758	235.475	209.535	265.162	295.174	230.297	228.754	227.033	248.843	352.734	319.313	385.648	437.536	148.713	144.51	150.416	148.667	203.687	196.569	183.41	221.917	229.835	209.914	220.743	229.456	294.046	322.216	276.321	326.068
1663	76719	Kansl1	294.133	165.234	199.076	180.646	315.881	336.753	329.979	342.923	187.116	177.204	169.475	185.077	284.217	269.3	274.877	279.537	291.547	272.187	286.041	297.619	426.394	416.924	419.364	405.682	253.945	260.507	250.221	269.633	400.191	379.154	405.422	385.985
3300	99526	Usp53	133.661	41.3085	27.3242	40.357	28.7164	74.8341	79.5486	82.4751	71.9677	49.9393	99.1269	59.1002	86.2802	65.4014	90.258	72.9227	161.856	167.695	154.821	166.61	193.313	201.524	221.744	232.068	207.916	199.858	183.039	200.29	232.558	196.047	221.208	233.379
8064	29871	Scmh1	361.496	291.913	378.635	299.795	712.167	628.606	527.378	516.555	406.617	352.797	316.566	326.606	598.886	611.696	685.141	641.112	151.134	154.991	160.8	159.775	298.096	316.493	282.55	300.323	194.451	193.573	194.693	173.208	331.832	354.891	319.355	325.737
5263	71897	Lypd6b	63.4756	22.0312	50.7449	34.5917	68.9194	67.3507	53.0324	69.4527	10.7951	45.1064	12.7906	18.6632	25.3765	26.93	28.7185	15.1922	95.7991	96.5518	119.577	95.6939	141.094	166.836	133.179	135.461	50.4133	46.1937	51.4154	38.3914	70.4199	67.2902	55.1132	54.6205
8275	101540	Prkd2	152.616	140.449	214.69	136.445	229.731	306.82	265.162	351.605	133.14	177.204	191.858	152.416	233.464	273.147	221.542	246.114	57.4103	60.6625	65.1381	65.7895	116.541	104.396	96.4967	116.559	78.5946	90.5019	78.1513	71.1282	118.512	120.669	101.544	115.2
132	208266	Dot1l	372.665	440.624	577.712	447.77	298.651	261.919	250.431	217.04	636.914	521.946	540.401	461.915	520.219	565.53	689.243	528.69	263.88	232.487	247.965	247.494	340.285	285.108	284.533	272.671	289.642	288.475	319.118	290.465	310.878	321.569	318.977	280.054
5015	66591	Mad2l1bp	141.097	129.433	144.428	134.523	218.245	239.469	218.022	316.878	147.534	159.483	223.835	147.751	223.314	250.064	233.85	267.383	62.598	57.804	52.5511	64.3655	94.4085	93.1638	89.8874	98.7077	76.4028	66.9337	74.0381	79.1636	101.336	97.7002	101.167	109.572
6634	15507	Hspb1	25281.8	19136.9	27691.1	16748.1	35292.5	48574.8	31943.2	39392.7	32504.2	33146.8	34694.4	28837.8	52610.6	83567.6	62015.5	92435.6	4249.4	3965.29	4130.45	3950.79	7510.83	9881.64	7404.47	8736.68	7347.19	7641.44	8078.04	7185.74	14384.2	18577.3	14446.8	17652.4
57	22154	Tubb5	14900.3	21673.2	27382.7	19853.7	16259.2	13694.6	13110.8	13417.4	21050.5	20871.4	21273.9	20319.6	21745.2	22078.8	23143	23845.7	8935.95	8850.05	8431.77	8609.32	12130.3	12360.7	11905.8	11990.9	9018.03	8798.79	9131.71	9006.5	10700.7	10678.1	10776.5	10865.8
184	272538	Tango6	112.018	209.296	253.725	226.768	137.839	67.3507	103.119	117.202	147.534	130.486	121.51	136.864	71.0543	103.873	118.976	121.538	109.287	111.162	96.2912	119.617	125.186	112.655	111.368	118.309	66.0696	65.0482	72.667	70.533	59.4275	54.3498	55.8682	57.5998
6543	321007	Serac1	22.0391	11.0156	19.5173	13.4523	28.7164	14.9668	35.3549	8.68159	25.1887	17.7204	3.19764	26.4396	22.8389	26.93	16.4106	24.3076	17.2923	21.9147	24.5448	15.0946	25.9364	25.7687	21.8109	26.9521	18.4744	24.1967	20.5661	24.1062	29.1985	24.5868	30.954	37.0758
3163	18477	Prdx1	6077.68	6501.96	3794.16	7156.64	10935.2	10798.6	10792.1	10161.8	7290.32	7682.59	6874.93	7466.85	12432	11252.9	10695.6	9665.3	2557.87	2681.85	2668.46	2762.02	3959.62	4197	4050.22	4100.57	2764.59	2773.51	2857.67	2763.29	4110.12	4411.71	4034.59	4214.06
8887	69077	Psmd11	1334.88	1283.32	1065.64	1322.17	2050.35	2589.26	2336.37	2135.67	1248.64	1222.71	1167.14	1213.11	2375.24	2346.76	2543.64	2351.76	666.789	629.492	626.207	652.484	1245.64	1158.6	1079.64	1147.39	622.182	586.691	594.361	634.5	1130.15	1092.17	1138.88	1124.19
83	67942	Atp5g2	2320.88	4508.14	6343.12	4456.56	2682.11	2402.17	2162.54	2291.94	3504.82	3811.49	3993.85	3575.56	3088.32	3331.63	3454.42	3001.99	1309.37	1278.36	1231.33	1280.19	1328.29	1427.52	1258.75	1330.45	1065.57	1019.4	1099.6	1000.85	1170	1141.67	1181.16	1216.22
3052	30945	Rnf19a	281.193	132.187	113.2	136.445	183.785	231.986	238.646	277.811	183.518	156.262	169.475	160.193	134.496	180.816	151.798	154.961	286.36	301.089	313.104	299.898	450.602	448.309	463.647	435.434	365.105	363.893	376.703	371.712	436.26	393.712	396.74	408.826
9764	117591	Slc2a9	27.4948	19.2773	11.7104	13.4523	17.2298	59.8673	23.57	13.0224	17.9919	9.66566	15.9882	13.9974	40.6025	42.3186	16.4106	18.2307	26.6301	25.726	27.6916	23.0691	42.8815	52.5285	40.9781	42.3533	25.9895	23.5682	20.9089	23.2134	37.0993	32.6746	36.6163	37.0758
927	68048	Aen	1391.98	861.971	1116.39	872.48	1814.88	1975.62	1529.1	1636.48	572.143	554.165	597.959	578.56	1103.88	1258.02	1210.28	1221.46	1374.39	1445.42	1371.68	1346.83	2153.41	2156.97	2116.32	2181.02	1003.57	1023.49	1011.85	1035.67	1978.28	1994.77	2044.1	2010.37
3898	240055	Neurl1b	16.967	19.2773	35.1311	17.2959	0	0	2.94624	13.0224	32.3854	12.8876	31.9764	4.66581	0	0	0	3.03845	41.5014	33.9837	38.0759	32.4676	19.02	17.1791	14.2101	16.8013	27.5551	24.1967	24.3366	22.6182	12.7099	5.49968	10.9471	12.2482
1336	13033	Ctsd	4841.81	3803.14	3930.78	3868.51	6960.86	7595.66	7000.28	6719.55	5674.65	5841.28	5717.38	4983.08	8610.26	9160.05	9255.55	9343.22	2076.8	2127.95	2053.9	2158.24	3051.5	3589.78	3293.12	3369.36	2874.81	2938.17	2956.73	2781.74	4395.92	4926.09	4423.02	4614.61
5407	21339	Taf1a	121.646	71.6014	89.7795	134.523	160.812	119.735	220.968	208.358	107.951	95.0457	70.3481	93.3161	119.27	126.956	127.182	94.1918	94.7616	108.621	104.787	101.105	159.768	162.211	167.547	156.462	98.3216	93.6443	104.887	108.032	129.16	119.375	106.452	115.862
1013	380840	Lyrm4	40.2629	16.5234	7.80691	30.7482	34.4597	29.9336	32.4087	43.408	21.5903	30.6079	47.9646	15.5527	15.2259	15.3886	16.4106	6.07689	84.0404	77.8131	78.3546	80.3145	54.9852	55.1715	63.7804	58.4546	44.4639	52.7928	46.2738	48.51	31.9466	33.9686	35.1064	38.0689
63	20102	Rps4x	14321.3	19522.4	14235.9	20149.7	10085.2	9578.76	9324.86	10079.3	20395.6	20032.1	19352.1	20168.7	15667.5	13588.1	13563.3	13259.8	11496.9	12357.4	12218.9	12227.7	14356.7	15205.5	14308.6	14783.4	11697.1	11617.9	11891.7	11645.1	14766.9	15601.9	15036.1	15744.6
1652	212531	Sh3bgrl2	1002.99	393.808	366.925	386.274	740.884	800.725	636.389	685.846	287.871	248.085	239.823	273.727	588.736	607.849	521.035	483.113	1375.77	1380.31	1344.3	1312.94	2141.65	2159.29	2004.62	1938.1	854.521	901.248	903.196	884.192	1631.68	1675.46	1641.32	1682.97
1071	109815	Selenos	595.091	512.226	347.408	468.91	850.006	755.824	795.486	872.5	478.585	473.617	508.425	493.02	827.275	815.594	849.246	947.995	384.58	377.949	374.466	410.117	529.448	548.411	510.904	586.646	436.185	451.252	429.147	473.494	652.672	769.631	699.485	817.322
3808	56795	Arl10	10.7095	16.5234	15.6138	3.84352	11.4866	14.9668	23.57	17.3632	3.59838	17.7204	3.19764	9.33161	5.07531	30.7771	12.3079	9.11534	6.57106	7.62251	11.0137	6.26567	3.11237	8.58957	6.93983	8.40066	7.2019	8.48455	10.9686	6.54737	13.0534	12.9404	10.1922	9.59997
21	110954	Rpl10	16555.2	23262.2	20231.6	23866.4	13020	11419.7	11787.9	12553.6	21932.1	21022.8	21670.4	22097.3	19428.3	17200.6	17961.3	16960.6	13037	13853	13753.3	13979	16351	17456	15991.4	16520.9	12608.6	13033.8	13037.9	12579.3	16230.9	17232.4	16298	16832.7
5660	66510	Rnf181	611.025	509.472	737.753	457.379	959.128	987.81	939.852	1141.63	363.437	394.681	345.345	438.586	636.951	784.817	705.654	865.957	428.502	454.81	424.499	416.667	661.205	762.82	674.486	712.306	337.863	345.667	354.08	377.069	624.161	712.37	611.53	775.281
1485	231123	Haus3	285.347	170.742	35.1311	192.176	246.961	217.019	306.409	260.448	205.108	214.256	188.661	259.73	352.734	257.759	283.082	303.845	263.534	289.338	303.349	277.114	359.651	357.458	382.682	398.331	316.57	314.243	309.178	327.666	357.252	347.45	371.826	376.054
61	22186	Uba52	4641.09	4736.71	5820.05	4831.31	2659.14	2596.74	2250.93	2391.78	5019.74	5024.53	4642.98	4326.76	3661.83	3831.75	3314.93	3712.98	5089.11	5226.82	5114.76	4641.15	5196.62	5802.25	5020.14	5552.48	5033.5	4907.84	5149.76	4612.62	5999.43	5962.62	5811.42	5931.13
2498	66997	Psmd12	2223.79	2051.66	1268.62	2161.98	3377.05	3315.15	3261.49	3468.3	2047.48	2081.34	1845.04	2085.62	3385.23	3377.79	3261.6	3290.64	1379.23	1405.72	1381.43	1480.12	2162.06	2235.27	2209.18	2160.72	1378.38	1325.48	1373.13	1390.42	2214.28	2293.04	2112.04	2158.01
26	20116	Rps8	10047	15336.5	15812.9	15493.2	8678.1	7947.38	7118.13	7388.04	15034	13673.7	14104.8	13344.2	10962.7	9198.52	9427.86	9659.22	8232.5	8511.8	8483.06	8210.02	9175.26	9548.96	8901.49	9528.79	7472.44	7607.81	7572.11	7361.62	9187.57	9722.78	9242.03	9518.21
520	28169	Agpat3	149.344	71.6014	97.5864	96.0881	45.9463	22.4502	44.1937	34.7264	25.1887	40.2736	54.3599	46.6581	35.5272	30.7771	20.5132	39.4998	318.178	322.051	320.027	311.575	330.948	327.064	277.263	303.124	167.522	173.148	159.388	145.53	200.954	200.9	173.267	193.324
9659	17769	Mthfr	54.6458	41.3085	27.3242	23.0611	51.6895	44.9004	53.0324	47.7488	17.9919	35.4408	6.39528	35.7712	17.7636	15.3886	28.7185	15.1922	67.4398	64.7913	64.5088	61.8023	96.1376	107.039	96.1663	121.109	56.6758	66.6194	73.6953	72.9139	62.8627	68.9077	80.7824	70.8412
6495	217737	Ahsa1	1629.02	1343.9	1303.75	1224.16	2308.8	2506.94	2189.06	2313.64	1104.7	1203.38	1106.38	1186.67	2360.02	2804.57	2203.12	3029.33	1023.36	1086.21	967.632	1044.37	1662	1867.24	1575.34	1820.14	968.812	873.909	842.184	900.858	1795.19	2045.23	1688.88	2149.73
3655	74596	Cds1	70.8031	16.5234	11.7104	23.0611	22.9731	52.3838	26.5162	30.3856	46.779	57.994	60.7552	48.2133	58.366	61.5543	53.3343	57.7305	60.1771	66.0618	69.8583	65.2199	80.2299	63.761	75.0163	59.1546	120.867	122.24	120.312	122.019	127.443	131.022	144.2	139.034
1991	319184	H2bc12	702.048	738.045	347.408	787.922	1108.45	1159.93	1196.18	1119.93	654.906	573.496	569.18	631.439	708.005	777.123	668.73	540.843	659.181	686.026	633.13	586.695	873.538	821.625	922.337	855.117	484.719	512.215	567.626	484.803	561.642	552.232	525.841	455.171
1291	226026	Smc5	740.885	517.733	281.049	591.902	872.979	890.525	954.583	746.617	374.232	383.405	351.741	468.136	484.692	492.434	459.495	428.421	868.763	887.705	905.955	882.605	1241.49	1200.56	1312.29	1212.84	747.119	713.016	688.28	718.425	803.131	827.863	822.923	836.522
277	12520	Cd81	3364.17	2850.29	2595.8	3072.9	5054.09	5380.57	5226.64	4935.49	4364.84	4175.57	4499.08	4062.36	6108.13	6997.95	6592.94	6174.12	1392.03	1452.72	1377.34	1437.69	1918.6	2068.1	1975.54	2080.56	1890.03	1928.51	1907.85	1874.63	2642.64	2645.99	2774.16	2831.99
7457	23954	Nek3	14.2034	16.5234	11.7104	9.60881	22.9731	7.48341	8.83873	43.408	10.7951	8.05472	6.39528	10.8869	12.6883	3.84714	0	12.1538	12.7963	19.3739	16.3632	12.8161	17.9826	20.8132	21.8109	21.3517	10.6463	15.3979	8.91199	10.4163	16.4886	13.5874	19.6294	16.5517
2381	233987	Zfp958	111.333	41.3085	19.5173	69.1834	51.6895	74.8341	91.3336	117.202	86.3612	75.7144	41.5693	73.0976	91.3555	88.4843	73.8475	88.1149	118.279	134.347	138.458	133.003	150.085	159.898	170.852	159.262	123.372	131.668	114.142	136.304	162.825	165.961	170.624	198.62
7895	384783	Irs2	299.991	181.757	300.566	215.237	430.746	381.654	430.152	373.308	428.208	367.295	409.298	419.923	563.359	700.18	603.088	774.804	97.5283	74.0019	90.3123	89.4282	168.759	134.79	138.797	150.862	185.684	152.408	167.271	174.1	296.107	256.544	279.718	263.834
2353	233789	Smg1	1550.33	908.787	550.387	851.34	1229.06	1391.91	1534.99	1428.12	716.078	599.271	652.319	730.976	1012.52	1057.96	1087.2	875.073	1754.47	1647.73	1709.01	1708.25	2833.98	2323.48	2568.4	2361.28	1822.08	1811.92	1912.31	2007.07	2269.93	2088.58	2421.96	2193.76
124	21406	Tcf12	443.006	327.714	257.628	326.699	189.528	209.535	173.828	212.699	298.666	318.967	326.159	272.172	390.799	427.033	361.032	385.883	574.449	539.293	542.188	563.341	743.856	786.937	766.025	777.061	446.518	456.594	440.458	509.802	475.077	526.999	561.702	544.55
972	13521	Slc26a2	267.666	165.234	136.621	136.445	292.907	261.919	232.753	273.47	125.943	217.477	127.906	178.856	360.347	284.689	278.979	331.191	250.392	261.389	254.574	262.304	317.461	294.358	298.743	332.176	247.37	263.964	235.482	297.31	363.779	395.653	378.998	438.951
2493	232023	Vopp1	470.031	247.851	206.883	211.394	459.463	351.72	394.797	381.99	273.477	243.253	246.218	189.743	238.539	292.383	348.724	376.767	526.376	526.906	540.615	473.628	758.726	757.864	766.356	780.911	554.546	496.503	541.918	509.504	724.123	726.281	705.147	718.343
1064	101685	Spty2d1	378.192	280.898	242.014	236.377	425.003	419.071	459.614	477.488	392.224	325.411	278.195	357.712	365.422	373.173	434.88	428.421	298.119	295.055	291.391	293.063	440.227	389.504	394.91	400.781	417.71	389.032	397.612	410.699	445.535	441.592	451.098	471.723
2998	71148	Mier1	235.046	60.5858	15.6138	65.3399	109.122	112.251	76.6024	95.4975	75.566	96.6566	99.1269	97.9819	147.184	92.3314	127.182	100.269	273.909	295.69	284.153	291.354	387.663	345.895	397.223	365.779	360.721	368.292	362.992	337.487	491.222	427.681	463.933	461.13
7110	26442	Psma5	1764.03	1580.74	1272.53	1796.85	3043.94	2604.23	2798.93	2760.75	1619.27	1776.87	1499.69	1729.46	3184.76	2954.61	2892.36	2871.33	904.731	938.522	930.5	1013.05	1564.14	1620.12	1606.41	1676.98	885.207	903.133	858.294	896.692	1599.73	1759.9	1522.03	1619.09
3208	195522	Zfp691	19.435	13.7695	15.6138	36.5135	0	0	14.7312	4.3408	10.7951	28.997	3.19764	21.7738	35.5272	15.3886	36.9237	6.07689	25.2467	24.1379	28.3209	22.7843	12.1037	16.188	18.8367	14.7011	25.0501	22.3112	26.3932	21.4278	25.7634	27.8219	27.5566	20.193
3922	69053	1810013L24Rik	463.676	297.421	265.435	347.839	465.206	561.256	577.464	590.348	352.642	367.295	370.926	331.272	499.918	523.211	623.601	574.266	335.47	323.957	356.844	350.308	534.981	520.33	550.23	542.542	423.346	368.292	428.461	402.068	654.734	584.26	637.954	612.081
8579	16649	Kpna4	1246.88	991.404	651.877	1178.04	1757.44	1601.45	1897.38	1519.28	1173.07	984.287	1007.26	1073.14	2101.18	1681.2	2043.11	1841.3	782.993	724.138	790.154	745.045	1439.99	1324.45	1480.17	1338.5	812.562	748.84	772.259	783.899	1382.29	1338.04	1400.1	1288.38
9152	14367	Fzd5	170.117	77.1092	54.6484	40.357	109.122	97.2843	70.7099	130.224	197.911	186.869	223.835	169.524	220.776	300.077	184.619	264.345	67.4398	72.0962	71.7464	68.068	131.411	119.263	115.003	110.259	241.42	237.882	242.338	231.241	335.268	286.954	294.063	321.765
6691	70097	Sash1	105.169	41.3085	42.938	53.8093	120.609	97.2843	67.7636	69.4527	75.566	99.8785	124.708	104.203	162.41	219.287	168.208	148.884	44.614	36.2069	47.5162	39.5876	95.4459	76.9758	93.192	79.1062	102.705	126.954	106.944	101.187	174.504	184.077	177.797	177.103
8739	207785	Csrnp2	72.1346	30.2929	46.8415	57.6528	74.6627	89.8009	88.3873	73.7935	28.7871	62.8268	22.3835	60.6555	96.4309	88.4843	77.9501	88.1149	43.9223	61.2977	63.8794	57.2454	106.512	90.8512	115.664	115.509	57.6152	52.7928	54.1575	49.9981	95.1528	88.3184	93.2395	102.951
5473	15586	Hyal1	230.379	184.511	206.883	165.271	235.475	381.654	285.786	399.353	223.1	251.307	239.823	220.848	400.949	407.797	496.419	477.036	98.22	83.8476	95.6618	88.8586	127.953	160.228	137.805	145.611	134.957	140.466	152.875	138.09	241.489	289.542	265.751	264.165
4719	70686	Dusp16	98.241	52.3241	46.8415	44.2005	86.1492	149.668	70.7099	60.7711	136.739	112.766	118.313	111.979	83.7426	88.4843	110.771	94.1918	63.9814	65.4265	71.4317	68.3528	96.8292	86.5564	96.8272	92.0572	161.573	134.496	129.567	110.412	119.199	124.875	121.174	135.062
8831	26558	Homer3	249.24	137.695	242.014	144.132	321.624	314.303	241.592	329.901	205.108	230.365	265.404	223.959	299.443	492.434	373.34	340.306	125.888	134.664	125.556	109.934	181.901	236.544	203.899	219.467	197.583	199.858	232.055	202.076	362.405	340.333	358.991	333.682
5253	216742	Fnip1	285.663	126.679	46.8415	140.289	149.325	217.019	200.345	234.403	151.132	162.705	198.254	171.08	208.088	230.829	221.542	243.076	321.29	285.527	293.279	276.544	445.76	464.167	470.587	424.233	357.277	321.156	341.398	318.44	435.917	451.621	492.244	454.509
3840	237782	Smcr8	578.286	253.359	308.373	232.533	425.003	501.388	468.453	429.739	367.035	333.465	370.926	363.933	649.639	665.556	689.243	592.497	418.127	369.374	385.165	377.649	822.357	785.615	786.514	717.906	598.697	592.976	615.27	601.763	1065.23	1037.82	1064.14	1037.13
623	100900	Hscb	62.1124	101.894	105.393	84.5575	28.7164	37.417	23.57	52.0896	79.1644	82.1581	115.115	59.1002	63.4414	65.4014	61.5396	45.5767	65.7106	74.3195	66.0822	74.0488	60.1724	58.4751	47.257	56.7044	49.787	57.1922	58.6135	60.4144	50.4962	48.2031	44.5436	48.3309
6328	14281	Fos	40.7809	24.7851	58.5519	42.2787	74.6627	37.417	67.7636	95.4975	61.1725	49.9393	76.7434	31.1054	60.9037	42.3186	32.8211	39.4998	24.555	20.0091	24.2301	21.645	29.7404	38.6531	24.4547	38.153	33.8176	35.8237	30.1637	29.1656	32.6336	27.4984	26.4241	31.7792
3086	74200	Khdc4	399.566	305.683	191.269	270.968	407.773	344.237	465.507	581.667	313.059	272.25	306.974	281.504	477.079	377.02	475.906	452.729	324.749	313.476	329.781	340.055	455.097	488.614	507.599	500.539	417.397	380.548	434.631	383.319	493.97	461.002	516.403	515.75
5333	105440	Kctd9	180.899	110.156	50.7449	103.775	218.245	172.118	176.775	91.1567	194.313	209.423	198.254	166.414	182.711	180.816	168.208	161.038	148.368	113.385	142.863	111.358	225.474	157.255	199.933	159.962	285.258	243.538	275.586	225.587	273.092	227.104	239.327	195.641
5596	71279	Slc29a3	72.077	68.8475	93.683	48.044	91.8925	164.635	117.85	99.8383	61.1725	101.489	70.3481	85.5398	109.119	115.414	135.387	212.691	30.7802	28.902	29.265	27.6259	47.0313	39.9745	41.3085	42.3533	35.0701	36.4521	33.2486	38.3914	54.6184	55.6438	55.8682	61.9033
7049	320376	Bcorl1	60.0655	46.8163	58.5519	44.2005	68.9194	67.3507	88.3873	104.179	125.943	125.654	124.708	97.9819	149.722	153.886	151.798	130.653	11.7587	7.94011	7.55225	8.5441	14.5244	11.5629	17.8453	9.45074	26.6157	32.6812	30.5064	23.511	32.2901	24.9103	29.8215	33.7654
8536	276905	Armc7	37.0632	27.539	35.1311	24.9829	40.203	44.9004	55.9786	39.0672	14.3935	24.1642	31.9764	21.7738	50.7531	69.2486	57.4369	60.7689	31.8178	28.902	27.3769	25.0627	39.4233	45.9212	45.6046	39.9031	22.232	21.6827	22.28	22.3206	45.6871	43.9974	43.4111	45.0206
7915	320332	H4f16	3468.34	4874.4	7084.77	4708.32	9970.34	9900.55	9684.31	9389.14	3252.94	3594.02	3779.61	3653.33	4874.83	4143.37	4480.08	4348.02	1177.95	1099.55	1180.67	985.419	1873.3	1703.38	1932.25	1933.2	885.207	841.542	921.706	815.743	1288.17	1074.38	1122.65	945.432
2689	59029	Psmd14	2436.6	1905.7	1233.49	2108.17	2917.59	3292.7	3184.89	3034.22	2385.73	2285.93	2273.52	2615.96	3801.41	3193.13	3159.03	3108.33	1554.92	1648.37	1649.22	1760.37	2301.77	2431.51	2528.08	2526.85	1934.49	1926.62	2007.6	2012.42	2579.43	2827.48	2650.72	2694.94
41	19933	Rpl21	8137.41	8683.05	8025.51	8918.89	4410.84	4325.41	4077.6	4405.91	9197.47	8538	9094.09	8833.93	7468.32	6536.3	6112.93	5812.55	8535.8	8999.96	8499.43	8461.22	9247.19	9931.52	9044.92	9723.06	8346.06	8651.1	8390.3	8410.99	10082.8	10458.8	10254.5	10781.4
854	240028	Lnpep	1004.74	660.936	292.759	645.712	924.669	718.407	1025.29	1111.24	834.825	781.308	770.632	768.303	956.696	907.926	964.12	890.265	1023.01	1030.94	946.548	1039.82	1389.5	1089.88	1199.27	1123.24	1256.57	1155.16	1175.7	1241.62	1342.79	1238.07	1388.02	1253.62
2012	50789	Fbxl3	152.357	77.1092	70.2622	84.5575	97.6358	172.118	138.473	147.587	147.534	98.2676	76.7434	85.5398	111.657	76.9429	90.258	130.653	151.826	149.909	164.261	164.331	190.2	185.997	210.508	201.966	222.006	199.544	200.177	186.302	222.939	212.223	234.42	221.13
8089	17087	Ly96	20.1995	13.7695	0	11.5306	22.9731	14.9668	20.6237	4.3408	25.1887	24.1642	25.5811	31.1054	63.4414	53.86	41.0264	30.3845	13.8338	9.21053	11.9577	7.40488	13.8327	14.2058	14.2101	15.0512	13.4644	11.9412	13.7108	12.7971	16.8321	25.8808	23.4042	25.4896
1957	20742	Sptbn1	514.637	126.679	148.331	186.411	304.394	231.986	265.162	299.515	349.043	396.292	338.95	385.707	439.014	477.046	430.777	498.305	450.29	445.599	414.115	446.571	610.024	594.002	610.044	607.997	793.775	770.523	857.265	822.588	949.81	896.771	903.706	903.06
2310	67581	Tbc1d23	212.308	121.172	124.911	140.289	201.015	246.952	238.646	221.381	187.116	182.037	150.289	163.303	243.615	246.217	209.235	170.153	166.352	180.082	183.771	193.951	226.857	241.829	269.332	247.819	203.845	214.628	217.316	225.587	284.428	302.806	281.983	294.62
7051	12799	Cnp	24.1168	11.0156	7.80691	17.2959	28.7164	29.9336	23.57	8.68159	50.3774	43.4955	31.9764	23.329	50.7531	65.4014	32.8211	39.4998	10.7212	8.89293	14.7898	6.55047	13.1411	11.5629	13.5492	14.0011	25.0501	25.4537	18.1668	18.7493	25.4199	25.8808	24.5367	26.4827
8421	19182	Psmc3	2626.77	1988.32	2174.23	2044.75	3698.67	3674.35	3391.13	3672.31	2612.43	2651.61	2730.79	2654.84	4128.76	4281.87	4644.19	4718.71	1354.68	1382.85	1361.92	1396.11	2222.92	2458.6	2374.08	2354.28	1669.59	1620.55	1720.7	1674.04	2621.34	2811.95	2630.71	2708.52
2643	18844	Plxna1	1495.41	713.26	1038.32	780.235	1447.31	1481.71	1399.47	1462.85	852.817	869.91	901.735	839.845	1535.28	1635.04	1677.98	1899.03	1181.06	1154.49	1056.69	1075.7	2395.14	2276.9	2064.1	2225.12	1227.77	1235.29	1233.28	1246.68	2411.11	2174.64	2415.17	2449.65
6266	229933	Clca2	186.253	145.957	128.814	128.758	246.961	224.502	276.947	173.632	219.501	228.754	217.44	157.082	408.562	361.631	336.416	334.229	78.161	72.0962	61.362	74.3336	127.261	144.371	160.608	128.81	132.452	139.524	131.281	113.984	211.603	223.869	187.989	196.965
7266	16859	Lgals9	39.494	33.0468	54.6484	30.7482	45.9463	67.3507	61.8711	69.4527	35.9838	88.6019	44.767	62.2108	81.2049	96.1786	110.771	75.9612	9.33782	11.1162	8.81096	9.96811	12.1037	13.2147	16.8539	12.951	20.9794	13.5124	21.2517	18.4517	26.7939	26.2043	24.1592	19.862
481	18709	Pik3r2	145.961	82.617	183.462	90.3228	57.4328	22.4502	47.1399	43.408	68.3693	64.4378	105.522	79.3187	78.6673	76.9429	57.4369	148.884	255.234	252.496	260.553	219.014	229.278	227.954	207.534	205.816	166.27	175.976	162.473	174.993	188.588	204.782	189.121	198.289
6614	53623	Gria3	18.4975	33.0468	19.5173	40.357	80.406	67.3507	44.1937	52.0896	0	0	0	0	2.53765	0	0	0	27.3218	23.1851	18.5659	25.6323	29.7404	37.9923	35.3601	32.5525	0	0.942728	0	0.892823	1.03054	0	0.377488	0.331034
3063	54201	Zfp316	27.7395	33.0468	50.7449	40.357	5.74328	7.48341	8.83873	4.3408	35.9838	27.386	47.9646	13.9974	7.61296	19.2357	28.7185	9.11534	47.3808	47.9583	57.5859	53.8278	16.9451	19.8221	16.1929	23.4518	39.767	37.3949	47.3021	46.1292	18.5496	12.9404	16.232	17.8758
7236	381305	Rc3h1	717.021	225.82	238.111	211.394	396.287	404.104	421.313	325.56	367.035	291.581	332.555	267.506	535.445	538.6	451.29	425.383	621.138	589.792	606.697	639.668	1167.14	936.593	970.916	915.671	1021.1	921.674	933.36	987.165	1671.53	1523.41	1667.74	1622.06
821	18504	Pax2	57.3391	104.648	222.497	146.054	68.9194	82.3175	61.8711	60.7711	115.148	117.599	159.882	143.085	101.506	69.2486	65.6422	91.1534	11.067	7.94011	9.75499	7.68969	12.1037	7.92883	6.60937	7.7006	11.5857	9.11304	15.7674	15.178	11.3359	10.6758	12.4571	10.262
76	57808	Rpl35a	6094.34	8616.96	6210.4	8674.83	4232.8	3816.54	3671.02	3633.25	8488.59	8394.63	7978.12	8676.85	7105.43	6105.42	6112.93	5918.89	5477.15	5826.46	5603.14	5574.17	5710.16	6267.08	5649.35	6181.83	5205.41	5105.19	5283.44	5037.9	6080.5	6165.79	5960.16	6160.2
3940	234378	Klhl26	100.117	121.172	124.911	84.5575	155.069	246.952	182.667	173.632	57.5741	61.2159	70.3481	76.2082	50.7531	88.4843	123.079	60.7689	83.3487	93.0581	95.3471	111.643	123.803	145.692	119.63	138.261	69.514	57.1922	58.9563	53.5694	81.4123	61.7905	72.1002	60.9102
1323	30941	Usp21	71.4125	55.078	46.8415	59.5746	11.4866	7.48341	32.4087	8.68159	53.9757	43.4955	54.3599	54.4344	27.9142	30.7771	28.7185	42.5383	101.333	117.514	108.878	115.06	80.2299	88.869	70.7202	76.306	113.352	111.242	130.595	110.71	103.397	111.611	110.604	105.6
5129	217887	Clba1	22.0879	22.0312	15.6138	5.76528	5.74328	59.8673	17.6775	17.3632	14.3935	24.1642	31.9764	12.4422	12.6883	11.5414	45.129	45.5767	16.6006	13.0218	13.8458	17.9426	14.8702	19.4917	16.1929	16.4513	21.9188	21.997	23.6511	19.6421	32.6336	31.3805	31.3315	31.7792
6918	26570	Slc7a11	2066.34	1743.22	1616.03	1491.29	3009.48	2776.34	2666.35	2747.72	1417.76	1082.55	991.269	958.046	1583.5	1219.54	1296.43	972.303	2452.04	2607.85	2256.55	2152.83	4004.23	3575.24	3808.32	3661.99	1869.36	1686.23	1511.61	1434.47	2198.82	1872.8	1872.34	1520.11
845	16661	Krt10	44.6873	33.0468	35.1311	38.4352	40.203	29.9336	55.9786	95.4975	25.1887	22.5532	38.3717	40.437	35.5272	15.3886	41.0264	57.7305	43.5765	44.147	54.1244	50.9798	41.844	35.3494	39.9867	35.7028	61.6858	54.0497	58.2707	56.8431	51.8703	45.9385	47.5635	58.924
1651	78889	Wsb1	718.206	525.995	366.925	559.233	878.722	636.09	981.099	855.137	644.111	654.043	601.157	690.539	839.963	592.46	500.522	495.267	717.629	610.118	663.968	662.452	862.126	778.017	910.771	813.814	963.489	872.652	825.388	810.088	838.512	737.28	699.862	676.964
9133	68303	Fam114a1	90.381	88.1248	58.5519	67.2616	114.866	112.251	111.957	156.269	53.9757	45.1064	57.5575	54.4344	91.3555	69.2486	41.0264	78.9996	79.8902	84.4828	87.1655	81.1689	116.887	127.522	143.093	164.513	62.6252	75.104	66.1544	65.4737	89.6566	110.641	119.664	126.786
10120	319554	Idi1	325.782	209.296	54.6484	224.846	287.164	284.369	291.678	325.56	219.501	312.523	214.242	325.051	499.918	542.447	455.393	519.574	168.427	195.327	177.793	199.077	289.45	290.393	342.035	363.678	273.359	317.699	299.58	329.749	440.039	553.85	509.609	582.95
6348	15926	Idh1	238.813	162.48	78.0691	199.863	241.218	224.502	220.968	386.331	287.871	269.028	265.404	278.393	433.939	469.351	447.188	401.075	126.579	107.986	128.388	137.845	158.385	190.622	205.221	215.967	180.674	176.604	187.837	193.743	242.863	251.691	256.692	276.413
6467	233863	Gtf3c1	1555.29	1354.92	1713.62	1341.39	2222.65	2828.73	2268.61	2795.47	1223.45	1290.37	1343.01	1376.41	1799.2	1877.41	1846.19	2163.37	1055.52	1092.56	993.435	1067.44	1696.93	1725.84	1662.92	1773.59	932.803	955.298	939.873	1015.73	1425.57	1482.33	1374.81	1574.4
6573	12367	Casp3	310.509	190.019	152.235	238.298	344.597	389.137	359.442	316.878	284.272	269.028	259.009	259.73	504.993	573.224	500.522	401.075	181.223	172.777	182.513	166.04	319.191	334.332	333.112	318.175	234.531	247.937	248.508	249.99	383.703	404.712	394.097	412.468
3657	102644	Oaf	81.9407	82.617	66.3588	82.6357	155.069	112.251	156.151	108.52	64.7709	64.4378	44.767	32.6606	81.2049	53.86	53.3343	51.6536	75.3942	74.6371	99.7526	87.7194	109.97	98.4497	116.325	94.8574	78.9078	66.6194	79.5224	49.7005	99.9619	74.7309	68.7028	54.6205
2732	60455	Pgap6	20.1885	16.5234	27.3242	9.60881	22.9731	29.9336	35.3549	13.0224	25.1887	22.5532	6.39528	13.9974	15.2259	26.93	28.7185	18.2307	31.1261	29.8548	28.9503	30.4739	25.2448	34.6886	22.1414	22.4017	10.02	10.9985	8.56923	9.52344	10.3054	15.852	12.4571	11.2551
5411	21762	Psmd2	4376.05	3927.06	3837.1	4047.23	6742.61	6720.1	6964.92	6728.23	4005	4072.47	4099.38	4119.91	6196.95	6482.44	6674.99	6283.51	2629.12	2608.49	2691.75	2719.3	4343.14	4487.39	4492.39	4423.65	2543.84	2521.8	2550.89	2636.51	3883.06	4188.49	3991.56	4044.24
3963	22401	Zmat3	386.318	330.468	526.967	380.509	671.964	793.241	665.851	677.164	223.1	178.815	204.649	188.188	408.562	461.657	352.827	370.69	280.135	278.539	305.866	301.322	688.179	574.51	527.758	541.142	164.391	163.092	150.133	177.672	358.97	319.952	361.633	347.916
8869	68616	Gdpd3	5.85299	2.7539	0	5.76528	0	0	2.94624	17.3632	0	8.05472	19.1858	12.4422	5.07531	7.69429	4.10264	15.1922	1.38338	1.27042	3.14677	2.56323	1.38327	4.62515	1.32187	3.8503	6.26252	9.74152	8.22646	5.95215	8.5878	7.44074	9.81468	5.29654
2574	19179	Psmc1	1901.09	1952.52	1537.96	1925.6	3055.43	3479.78	3276.22	2795.47	1899.95	1934.74	1924.98	1853.88	2834.56	2662.22	2720.05	2834.87	1055.17	1184.03	1103.26	1173.39	1686.21	1783.33	1766.68	1743.84	1078.09	1070	1087.61	1131.5	1568.13	1671.9	1552.98	1589.29
1409	22589	Atrx	756.491	418.593	202.98	520.797	603.045	733.374	742.454	633.756	453.396	417.234	428.484	510.128	619.188	480.893	410.264	449.69	899.197	985.527	946.548	973.173	1182.35	1125.89	1233.31	1135.84	936.873	929.844	873.375	980.617	855.001	845.656	958.442	965.294
5865	20907	Stx1a	43.9427	19.2773	7.80691	28.8264	63.1761	37.417	26.5162	21.704	35.9838	43.4955	38.3717	45.1028	53.2907	46.1657	36.9237	24.3076	36.3137	31.1252	44.0548	39.3028	49.1062	46.2515	49.2398	43.4034	56.6758	56.8779	67.8683	51.7837	68.7024	70.5253	63.0405	59.586
5683	244059	Chd2	464.748	253.359	128.814	207.55	407.773	411.587	338.818	277.811	219.501	199.757	185.463	183.522	175.098	207.746	192.824	170.153	645.693	556.761	549.741	510.367	1070.31	1091.54	1089.22	1067.93	552.041	525.728	509.355	521.111	520.077	547.056	570.762	519.723
3487	232853	Zfp954	90.4502	49.5702	19.5173	53.8093	80.406	74.8341	61.8711	95.4975	50.3774	54.7721	70.3481	49.7686	104.044	50.0129	49.2317	45.5767	86.8071	80.354	103.529	84.8714	106.166	111.664	116.325	111.309	124.624	123.183	120.997	104.758	147.023	156.256	155.902	160.551
9621	230824	Grhl3	56.9492	33.0468	23.4207	13.4523	51.6895	44.9004	50.0862	0	71.9677	82.1581	63.9528	71.5424	139.571	146.191	143.592	106.346	19.0215	13.9746	16.3632	14.2402	29.3946	24.4472	26.4375	19.2515	59.1808	58.1349	55.8714	33.6297	86.565	105.141	93.9945	67.8619
8004	55942	Sertad1	394.018	324.96	464.511	320.934	608.788	666.023	536.217	698.868	381.429	364.073	441.275	320.385	614.112	565.53	529.24	710.996	188.14	180.082	189.121	178.572	357.231	323.1	333.112	317.825	272.733	236.939	283.127	234.515	453.092	385.301	366.541	367.778
5254	75869	Arl5b	232.559	38.5546	23.4207	59.5746	80.406	59.8673	67.7636	95.4975	57.5741	85.38	44.767	108.869	124.345	138.497	110.771	112.423	207.161	236.298	209.26	235.532	284.609	300.965	309.979	333.576	416.458	404.744	391.785	394.925	515.611	572.937	562.457	625.322
343	71750	R3hdm2	145.278	123.926	242.014	203.707	80.406	59.8673	79.5486	125.883	151.132	178.815	156.684	174.19	83.7426	123.109	164.106	112.423	169.81	163.884	164.891	160.629	207.837	143.049	148.05	176.064	133.705	144.866	132.309	155.946	136.374	131.022	144.2	131.42
9925	56708	Clcf1	127.471	27.539	39.0346	9.60881	11.4866	59.8673	41.2474	34.7264	118.747	51.5502	92.7316	69.9871	104.044	134.65	123.079	121.538	81.9653	66.697	77.0959	66.9288	129.682	125.209	109.055	104.658	238.915	190.431	235.825	167.256	362.061	313.482	333.322	309.185
534	52065	Mfhas1	215.297	110.156	175.656	136.445	40.203	37.417	44.1937	17.3632	115.148	117.599	137.499	129.087	40.6025	80.79	36.9237	63.8074	463.778	451.634	461.946	440.021	271.813	237.535	256.774	245.019	403.62	405.687	410.98	421.412	241.145	205.106	232.532	242.317
65	26936	Mprip	2471.12	983.143	1194.46	926.289	551.355	508.872	477.292	438.42	924.784	768.42	920.921	788.521	817.125	915.62	783.604	780.881	4511.2	4457.58	4500.2	4298.25	4750.86	4735.5	4527.42	4457.25	3238.35	3279.75	3309.78	3236.78	3968.59	3796.07	3885.48	3872.1
7962	11622	Ahr	60.7849	35.8007	62.4553	42.2787	40.203	59.8673	64.8174	134.565	53.9757	70.8815	67.1505	48.2133	142.109	96.1786	98.4633	75.9612	25.2467	34.9365	32.4117	29.6195	64.3223	58.8055	56.1796	54.9543	49.787	31.7385	34.2769	44.9388	58.7405	76.9955	67.9478	70.5102
5771	382207	Jade3	607.623	346.991	300.566	465.066	562.842	651.056	760.131	620.734	456.995	399.514	438.077	433.92	652.177	534.753	582.575	586.42	535.022	537.387	560.125	545.683	854.518	871.511	876.402	884.869	561.748	571.607	558.714	579.144	766.031	794.865	776.87	769.984
385	66475	Rps23	5897.04	2828.26	1026.61	2934.53	1165.89	1047.68	1125.47	1198.06	2745.57	2650	2420.61	2777.71	2481.83	1642.73	1989.78	1470.61	9002.7	9303.91	9621.25	9448.92	9924.3	10422.5	9800.7	10099.7	8727.14	8600.51	8548.66	8307.42	9947.76	11098	9976.25	10473.2
2165	17761	Map7	384.737	355.253	308.373	245.985	534.125	523.838	515.593	468.806	449.798	314.134	370.926	306.388	431.401	523.211	500.522	519.574	290.164	282.668	282.895	261.449	388.354	401.728	390.283	359.128	325.964	320.842	349.282	279.454	396.069	410.535	409.952	410.151
6518	16402	Itga5	94.7314	96.3865	175.656	99.9316	143.582	194.569	238.646	217.04	107.951	119.21	115.115	101.092	208.088	150.039	172.311	236.999	28.7051	22.8675	19.1953	16.5186	49.1062	30.7242	43.6218	49.0038	24.1107	25.7679	33.2486	22.6182	49.8092	50.1441	47.941	46.6757
4952	70008	Ace2	21.4501	11.0156	0	7.68705	5.74328	14.9668	11.785	13.0224	28.7871	19.3313	12.7906	24.8843	27.9142	26.93	20.5132	33.4229	7.60859	6.35209	8.81096	9.39851	6.22473	4.29478	10.2445	8.05063	35.0701	40.5373	37.7046	41.0699	32.6336	46.909	53.9808	57.2688
8214	16637	Klra6	31.3394	11.0156	0	7.68705	5.74328	14.9668	5.89249	21.704	7.19677	4.83283	22.3835	13.9974	7.61296	11.5414	8.20528	15.1922	36.3137	37.4773	49.0896	48.9862	56.7142	57.484	55.1882	59.8547	46.3427	46.1937	55.8714	58.6287	52.5573	48.2031	46.0535	58.5929
6664	105000	Dnal1	13.5462	0	11.7104	9.60881	11.4866	0	5.89249	26.0448	3.59838	9.66566	3.19764	12.4422	12.6883	0	8.20528	21.2691	10.7212	15.245	15.7338	17.0882	17.9826	16.5184	18.1758	12.601	14.4038	13.1982	18.8523	17.8565	14.4275	24.9103	25.2917	31.1172
655	227656	Rexo4	441.679	305.683	304.47	305.56	493.922	456.488	548.001	551.281	277.075	343.131	338.95	368.599	428.864	523.211	475.906	507.421	374.55	387.478	381.389	430.053	425.011	505.133	486.449	502.989	397.983	451.881	450.741	454.447	520.42	547.703	558.682	588.578
1661	52502	Carhsp1	1358.35	751.815	1174.94	705.286	1527.71	1623.9	1328.76	1441.14	716.078	797.417	876.154	622.108	1446.46	1838.93	1636.95	1491.88	929.632	955.355	960.394	919.63	2043.79	2151.03	2016.52	1997.26	901.803	912.875	925.476	821.1	2157.25	2182.08	2143.38	2111.66
208	267019	Rps15a	4774.53	3249.6	1779.98	3858.9	1734.47	1324.56	1655.79	1371.69	3404.07	3113.95	3008.98	3771.53	2994.43	2296.74	2342.61	2108.68	6373.93	6734.49	6707.97	6751.83	7367.66	7572.37	6914.06	7432.48	6130.07	6008.95	6179.78	5919.12	7300.31	7605.41	7448.21	7547.9
6661	234353	Psd3	13.7957	0	0	7.68705	0	0	8.83873	8.68159	14.3935	11.2766	12.7906	17.108	12.6883	0	4.10264	9.11534	7.60859	7.30491	11.3284	14.8098	14.8702	8.2592	8.26171	8.75068	30.6864	28.5961	30.8492	34.8201	26.4504	32.0275	24.9142	31.4482
4359	13211	Dhx9	1885.7	2789.7	1885.37	2873.03	3893.95	4100.91	4825.95	4379.86	2414.51	2493.74	2388.64	2824.37	3679.6	3181.59	3171.34	3026.29	584.824	548.503	520.79	581.283	1061.66	713.595	737.275	751.509	607.778	553.067	549.116	675.867	662.978	620.17	692.69	666.702
6372	110351	Rap1gap	21.3311	2.7539	11.7104	7.68705	5.74328	14.9668	5.89249	21.704	10.7951	19.3313	15.9882	15.5527	25.3765	26.93	20.5132	15.1922	16.6006	19.0563	22.6567	21.0754	22.4782	22.465	22.4718	19.6015	34.4439	31.11	28.4498	26.7847	45.0001	33.9686	38.8812	36.0827
1926	226562	Prrc2c	2249.66	2327.05	2256.2	2379.14	3428.74	3876.4	4269.11	4201.89	2295.77	2126.45	2168	2026.52	3083.25	2654.53	2789.79	2707.26	1567.37	1405.08	1442.16	1529.11	2490.59	1905.56	2115	2024.21	1539.95	1432.95	1413.58	1600.83	1760.84	1599.76	1698.7	1623.72
2067	240665	Ccnj	65.0215	44.0624	89.7795	26.9047	11.4866	7.48341	14.7312	8.68159	43.1806	22.5532	25.5811	32.6606	27.9142	26.93	24.6158	21.2691	147.33	142.604	138.458	125.029	69.1637	73.0113	70.3897	75.6059	108.968	106.528	106.601	108.329	77.2902	71.1723	90.2196	77.1308
1935	12075	Bfsp1	57.7338	57.8319	62.4553	57.6528	0	29.9336	11.785	17.3632	100.755	64.4378	108.72	66.8766	40.6025	26.93	24.6158	21.2691	86.1154	74.0019	75.2078	76.8969	35.2735	34.3583	42.9609	43.0534	117.109	104.329	82.2646	102.377	66.9848	54.6733	58.8881	44.0275
7329	71862	Gpr160	13.2392	0	3.90346	5.76528	0	0	11.785	0	14.3935	3.22189	3.19764	6.22108	25.3765	30.7771	12.3079	18.2307	8.64613	11.7514	11.643	6.55047	16.5993	17.8399	24.1242	18.5514	13.4644	15.0836	11.3114	15.4756	19.9237	25.5573	30.5765	28.1379
3023	327987	Med13	829.444	313.945	230.304	349.761	568.585	508.872	545.055	464.465	543.356	496.171	549.994	443.252	565.897	565.53	562.061	385.883	919.256	840.064	901.235	854.979	1412.32	1134.15	1279.57	1158.94	1197.08	1168.67	1144.85	1204.72	1424.54	1258.13	1393.69	1327.44
1010	240186	Zfp438	26.4628	22.0312	19.5173	13.4523	11.4866	52.3838	26.5162	30.3856	17.9919	35.4408	12.7906	31.1054	25.3765	26.93	12.3079	30.3845	31.8178	36.5245	35.8732	39.5876	22.4782	19.4917	23.4632	24.1519	26.3026	31.7385	31.8775	34.5225	22.6718	20.0577	21.8943	29.793
3930	70683	Utp20	1141.64	988.65	800.209	1128.07	1527.71	1534.1	1776.59	1836.16	942.776	892.463	834.584	895.835	1136.87	1146.45	1111.81	1112.07	1023.01	1014.11	999.099	1031.84	1581.77	1533.57	1621.61	1576.52	823.835	792.834	770.545	887.466	981.07	983.148	1053.57	1052.36
5158	229003	Helz2	111.914	107.402	128.814	69.1834	114.866	149.668	153.205	221.381	172.722	136.93	108.72	101.092	154.797	173.121	131.284	151.922	54.2977	56.216	54.4391	50.4102	81.6132	68.3862	80.9647	77.356	109.281	99.6149	109.001	87.7943	118.168	118.081	111.736	116.855
1508	68277	2310057M21Rik	251.516	217.558	206.883	211.394	361.827	374.17	335.872	386.331	287.871	294.803	259.009	273.727	347.659	388.561	377.443	416.267	150.443	135.3	148.528	156.072	199.883	185.997	202.577	194.265	176.603	160.264	175.155	158.625	258.321	258.161	243.857	253.572
4108	28006	Washc2	508.871	338.73	261.532	309.404	470.949	583.706	568.625	460.124	370.633	388.237	351.741	407.48	588.736	492.434	471.803	449.69	389.768	411.616	430.163	423.502	599.304	639.593	650.362	618.848	514.153	506.873	501.471	541.348	732.711	776.102	771.585	753.764
8071	16666	Krt16	3717.91	2517.07	2427.95	2323.41	2992.25	4714.55	4445.88	4280.03	6595.84	7556.94	6583.94	5790.27	6346.67	8663.77	7282.18	7398.62	1033.04	936.616	1002.56	996.242	1451.05	1975.6	1953.73	1732.64	2894.22	3160.65	2898.8	2532.05	2893.74	3841.04	2998.76	3035.25
5421	15218	Foxn1	25.3385	24.7851	54.6484	36.5135	51.6895	44.9004	53.0324	86.8159	17.9919	37.0517	31.9764	17.108	27.9142	53.86	24.6158	57.7305	7.26275	8.89293	10.0697	9.68331	10.0287	14.2058	6.93983	11.5509	13.1513	9.42728	7.54092	6.54737	8.93131	14.8815	12.8346	12.9103
9455	74126	Syvn1	497.275	575.565	893.892	478.519	1016.56	1077.61	945.745	1293.56	737.668	686.262	697.086	682.763	966.846	1227.24	1111.81	1513.15	58.4478	51.1343	62.9354	60.3783	106.166	90.8512	99.1405	108.158	81.0997	74.7897	68.211	77.9732	129.16	148.491	137.406	156.91
27	19988	Rpl6	17928.9	24118.7	28319.6	23595.4	15587.3	14323.2	13732.4	13890.5	23468.7	23292.6	23374.8	21758.2	20895	19293.4	19286.5	18637.8	13731.8	14164.2	14447.8	14039.7	17131.9	17542.2	16756.1	17119.1	13981.7	13629	14269.5	13485.5	17632.8	18553.6	17500	18237.3
2728	22145	Tuba4a	4101.02	3365.27	3396.01	3134.39	4973.68	6113.94	5565.46	5682.1	4735.47	4839.28	4735.71	4500.95	7516.53	7805.85	7544.75	7772.35	1918.75	1963.43	1959.49	1902.77	3034.56	3222.41	2883.34	2944.08	2445.2	2483.46	2480.96	2483.54	3844.58	4073.97	3752.23	4057.15
5565	13666	Eif2ak3	230.42	79.8631	85.876	132.602	206.758	172.118	135.527	208.358	111.55	133.708	198.254	147.751	236.002	280.841	328.211	273.46	185.719	204.537	208.001	203.349	264.205	299.644	305.022	295.423	219.501	249.823	230.341	267.549	321.871	356.185	378.243	422.73
2802	329575	Gm14325	116.412	24.7851	0	23.0611	40.203	14.9668	32.4087	26.0448	21.5903	41.8845	25.5811	49.7686	48.2154	53.86	41.0264	54.692	152.172	190.88	175.59	191.673	131.065	165.184	168.539	179.914	202.906	210.228	223.828	240.169	176.222	238.751	218.943	244.634
6534	26372	Clcn6	39.4866	16.5234	27.3242	13.4523	57.4328	14.9668	29.4624	13.0224	53.9757	46.7174	31.9764	57.545	40.6025	69.2486	73.8475	48.6151	29.3968	29.5372	24.5448	21.9298	35.6193	28.0813	40.3171	28.0022	40.3933	41.7943	49.016	46.1292	51.8703	54.6733	60.3981	47.6688
6592	320299	Iqcb1	53.7083	30.2929	11.7104	46.1223	40.203	52.3838	55.9786	60.7711	28.7871	37.0517	38.3717	45.1028	63.4414	61.5543	45.129	24.3076	62.598	61.9329	65.4528	56.6758	83.6881	81.2705	97.8186	69.3054	48.5345	43.3655	53.1292	49.4029	68.0153	60.4965	61.153	60.9102
4470	53415	Htatip2	389.185	388.3	331.794	382.43	637.504	613.639	603.98	668.483	363.437	328.633	329.357	287.725	563.359	584.766	553.856	519.574	261.459	256.307	258.664	264.297	401.15	386.2	382.682	410.582	229.208	229.083	215.259	193.445	367.901	387.566	323.13	340.965
4739	230936	Phf13	61.0151	49.5702	62.4553	74.9487	91.8925	89.8009	106.065	134.565	61.1725	69.2706	102.325	54.4344	106.581	53.86	110.771	60.7689	30.0885	33.3485	39.3346	29.3347	44.6106	44.2693	44.6132	44.8035	44.4639	39.9088	41.1323	45.2364	50.4962	39.1448	49.8284	42.3723
7489	244049	Mctp2	150.96	49.5702	54.6484	74.9487	132.096	97.2843	94.2798	104.179	100.755	98.2676	105.522	85.5398	131.958	96.1786	131.284	106.346	151.48	144.51	156.394	152.37	245.877	233.57	242.233	205.816	202.279	184.775	219.715	189.874	239.428	207.37	233.665	207.558
1767	170791	Rbm39	2370.93	1633.06	889.988	1573.92	2188.19	2267.47	2460.11	2417.82	1540.11	1620.61	1560.45	1937.87	2030.12	1831.24	1952.86	2078.3	2583.12	2553.22	2563.99	2655.79	3274.9	3359.51	3653.33	3662.69	2511.58	2490.06	2488.5	2571.03	2781.07	2793.19	2802.47	2772.41
3843	16835	Ldlr	1740.1	1410	1912.69	1510.5	2360.49	2858.66	2878.48	2678.27	2594.43	2343.92	2334.28	2149.38	2458.99	2489.1	2633.89	2461.14	858.042	742.877	862.844	824.505	1213.48	1167.19	1355.25	1232.1	1294.15	1205.12	1324.46	1215.43	1418.36	1348.07	1481.26	1325.79
6282	78749	Filip1l	57.88	33.0468	39.0346	38.4352	11.4866	29.9336	106.065	52.0896	46.779	49.9393	47.9646	40.437	35.5272	50.0129	86.1554	66.8458	44.2682	57.4864	53.1804	52.119	53.6019	74.0024	65.4327	79.1062	75.1503	65.6767	68.211	57.7359	71.107	76.025	77.385	90.0411
3508	213575	Dync2li1	8.51091	13.7695	0	7.68705	28.7164	14.9668	5.89249	8.68159	7.19677	17.7204	9.59292	7.77634	10.1506	0	12.3079	18.2307	4.49599	7.62251	7.86692	6.83528	5.5331	4.62515	5.28749	4.20033	6.88877	7.85607	7.88369	7.14258	9.96184	3.2351	6.41729	5.29654
1919	109346	Ankrd39	20.7058	27.539	66.3588	40.357	11.4866	7.48341	23.57	17.3632	28.7871	28.997	22.3835	23.329	35.5272	26.93	16.4106	15.1922	13.8338	18.7387	18.8806	15.949	13.1411	11.2325	17.1843	16.1013	20.0401	13.1982	17.4812	19.0469	14.771	10.9994	16.987	12.5793
3797	54392	Ncapg	619.064	611.366	210.787	703.365	694.937	898.009	1037.08	855.137	608.127	665.32	597.959	883.393	779.06	734.804	693.346	777.842	429.886	467.196	478.624	502.962	585.817	574.84	650.031	641.95	478.457	487.705	464.452	538.075	499.123	554.173	546.602	540.578
2686	214359	Tmem51	189.002	121.172	175.656	130.68	206.758	209.535	209.183	303.856	133.14	115.988	147.092	138.419	172.56	200.051	135.387	191.422	169.81	170.236	156.709	164.616	212.678	257.026	188.036	202.666	207.603	193.259	180.639	167.851	264.161	247.486	253.672	231.724
2603	241624	Exd1	27.4764	24.7851	46.8415	23.0611	11.4866	0	17.6775	4.3408	50.3774	43.4955	60.7552	35.7712	22.8389	30.7771	16.4106	39.4998	24.9009	24.7732	22.3421	30.7587	17.6367	18.1702	20.8195	20.3016	36.9489	34.5667	34.2769	40.7722	22.3283	28.1454	23.4042	23.5034
1210	83431	Ndel1	518.188	212.05	136.621	255.594	333.11	404.104	344.711	368.968	403.019	434.955	409.298	410.591	461.853	438.574	471.803	340.306	504.588	504.991	499.392	513.215	636.652	620.101	662.589	651.751	790.643	757.325	781.856	667.832	791.795	739.868	784.42	731.253
95	68436	Rpl34	4682.12	8085.45	5574.14	7965.7	4071.99	3749.19	3429.43	3407.53	7261.54	7039.82	7674.34	7415.52	6245.17	6090.03	5115.99	4718.71	3416.26	3589.88	3515.89	3473.18	3685.04	3815.42	3599.13	3898.25	3329.47	3179.51	3153.13	3124.88	3731.57	3966.89	3850.75	3972.07
2018	319187	H2bc15	499.808	291.913	202.98	276.734	488.179	463.971	436.044	395.012	233.895	167.538	249.416	181.966	223.314	176.969	192.824	179.268	762.934	701.906	756.798	629.13	918.148	844.421	1007.27	966.775	643.787	644.197	646.12	588.668	607.329	535.733	588.881	491.916
299	12972	Cryz	82.8917	134.941	167.849	128.758	80.406	74.8341	73.6561	82.4751	86.3612	64.4378	95.9292	85.5398	76.1296	88.4843	53.3343	39.4998	91.649	85.4356	97.2352	87.4346	107.204	104.727	109.715	101.858	56.9889	55.6209	53.472	53.867	60.4581	55.6438	52.4708	63.2274
4649	56041	Uso1	640.461	663.69	444.994	645.712	901.695	957.876	1101.9	1002.72	978.76	944.013	818.596	975.154	1271.36	1292.64	1218.48	1227.53	240.708	218.83	226.882	231.545	417.403	308.894	323.859	307.674	367.61	342.21	317.061	402.663	420.802	431.239	411.839	439.944
2832	218850	Tasor	166.176	82.617	66.3588	96.0881	155.069	82.3175	170.882	130.224	111.55	119.21	115.115	171.08	121.807	203.899	118.976	94.1918	174.652	185.163	190.38	186.261	226.511	205.819	268.671	221.917	206.976	204.572	189.209	204.754	217.787	196.047	204.598	228.744
4657	74525	Fam234b	20.2792	19.2773	23.4207	15.3741	22.9731	37.417	26.5162	34.7264	28.7871	12.8876	12.7906	15.5527	45.6778	19.2357	12.3079	24.3076	16.9464	19.3739	16.3632	17.373	18.3284	21.8043	18.8367	16.4513	12.2119	13.1982	17.4812	18.7493	18.5496	16.8225	14.722	20.193
2914	26428	Orc4	567.095	382.792	113.2	415.1	482.436	598.673	524.432	525.236	417.412	451.064	386.915	552.12	776.522	607.849	582.575	540.843	503.551	506.579	516.385	547.961	634.923	640.584	653.336	705.305	619.99	588.576	611.157	655.034	752.291	741.163	777.625	768.329
4519	70349	Copb1	1560.14	1704.66	1003.19	1775.71	2366.23	2297.41	2754.74	2699.98	1741.62	1710.82	1704.34	1900.54	2276.28	2246.73	2145.68	2166.41	965.254	915.336	959.765	1004.5	1338.32	1433.8	1503.96	1459.61	966.307	904.39	908.338	955.321	1071.76	1132.61	1137.75	1212.91
1539	218613	Mier3	197.112	110.156	66.3588	96.0881	126.352	202.052	167.936	138.905	93.558	120.821	131.103	121.311	185.249	115.414	168.208	127.615	201.628	245.826	239.155	242.937	275.617	261.982	282.55	255.52	294.025	246.366	259.133	244.633	286.489	254.279	288.023	261.186
5346	234086	Erich1	139.772	99.1404	121.007	105.697	172.298	194.569	185.613	169.291	136.739	133.708	99.1269	101.092	170.023	253.911	143.592	224.845	99.9493	100.363	87.1655	88.8586	126.915	148.996	131.857	136.861	101.453	105.586	104.887	109.222	165.916	185.695	162.697	165.848
3417	17345	Mki67	2193.41	1374.2	741.657	1395.2	1855.08	1893.3	2074.16	2126.99	1176.67	1221.1	1115.98	1258.21	1410.94	1219.54	1177.46	1242.72	2652.29	2670.74	2633.22	2672.02	4053.69	3429.22	4060.46	3617.53	2666.89	2570.19	2610.53	2856.14	2486.68	2457.06	2614.48	2661.51
354	78926	Gas2l1	463.041	129.433	202.98	157.584	51.6895	74.8341	58.9249	73.7935	205.108	149.818	143.894	163.303	96.4309	138.497	86.1554	85.0765	667.481	587.886	641.626	577.296	548.122	550.724	499.668	495.289	1065.25	1059.31	1096.86	913.953	1011.99	934.298	979.958	907.032
3720	404710	Iqgap3	181.995	187.265	163.945	159.506	287.164	351.72	285.786	238.744	201.509	207.812	175.87	199.074	203.012	184.663	196.927	200.537	134.534	124.183	118.004	134.427	191.583	174.434	185.393	172.213	149.674	135.753	153.561	133.923	148.054	149.462	132.876	160.22
2217	235106	Ntm	60.6353	44.0624	0	32.6699	45.9463	52.3838	38.3012	52.0896	39.5822	56.383	35.1741	48.2133	58.366	69.2486	36.9237	75.9612	62.9438	58.7568	78.9839	82.5929	59.4808	56.1626	75.3468	66.5052	98.6347	79.5034	92.5476	74.9971	65.6108	78.613	90.2196	73.4895
3217	66482	Exoc2	173.191	192.773	144.428	146.054	212.501	291.853	288.732	273.47	187.116	161.094	147.092	155.527	200.475	230.829	196.927	206.614	135.225	152.133	149.157	133.573	181.901	210.775	211.169	182.364	113.978	115.641	103.859	116.662	134.657	125.199	134.386	132.744
4343	13175	Dclk1	12.2527	13.7695	0	7.68705	34.4597	14.9668	8.83873	0	10.7951	0	0	3.11054	5.07531	0	4.10264	0	21.7882	24.7732	24.5448	18.797	23.5157	20.8132	19.1672	13.301	17.5351	14.7694	13.0252	14.5828	11.3359	14.2345	13.5896	11.2551
55	11837	Rplp0	26108.4	15270.4	19993.5	16064	8528.78	8067.11	8181.72	8547.03	14710.2	14712.8	15706.8	14530.9	11282.4	12418.6	12644.3	12794.9	38024.3	39197.8	39181.7	36644.2	39165	41032.4	37332.3	39814.9	34968.4	35804.2	35677.1	32422	41572.5	42219.4	40828.3	42021.7
163	19934	Rpl22	3555.66	4342.9	2958.82	5046.55	2211.16	2379.72	1956.31	1875.22	4062.57	3519.91	3805.19	3911.5	3930.83	2877.66	2880.05	2424.68	3704	4118.38	3948.88	4064.14	4212.07	4381.67	4033.37	4266.13	3476.64	3322.49	3275.5	3337.07	3874.81	4111.17	3854.53	4061.45
584	110920	Hspa13	307.679	179.004	148.331	201.785	246.961	321.787	294.624	351.605	273.477	257.751	278.195	281.504	370.497	392.409	426.674	407.152	255.234	265.517	254.888	283.949	303.283	287.09	316.258	295.073	300.601	295.074	273.187	313.381	403.283	398.888	408.064	452.523
3652	12163	Bmp8a	42.1061	55.078	35.1311	46.1223	68.9194	97.2843	67.7636	86.8159	3.59838	28.997	38.3717	32.6606	63.4414	42.3186	65.6422	75.9612	26.6301	31.7605	29.5796	33.0372	32.1611	41.9567	36.682	36.7529	21.6057	25.1394	26.0504	22.023	30.9161	40.4388	31.3315	31.1172
9774	208194	Exog	77.3943	71.6014	54.6484	44.2005	114.866	104.768	79.5486	86.8159	61.1725	43.4955	35.1741	57.545	60.9037	96.1786	69.7448	75.9612	57.0645	71.7786	73.0051	76.0425	107.55	110.343	115.994	140.711	53.2314	62.22	70.2677	57.7359	88.9696	79.9071	78.14	99.6411
4286	100561	Slc15a4	143.311	115.664	222.497	126.836	201.015	269.403	244.538	269.129	136.739	143.374	121.51	139.974	180.173	138.497	250.261	291.691	72.2816	85.4356	80.2426	88.0042	110.316	116.62	115.333	110.609	77.9684	75.104	88.7772	81.2469	126.756	110.317	118.909	133.407
9239	22724	Zbtb7b	374.965	280.898	444.994	232.533	603.045	568.739	453.722	455.784	262.682	233.587	294.183	214.627	385.723	461.657	393.853	419.306	312.298	270.917	286.985	292.208	477.23	492.579	461.664	470.087	253.632	284.704	264.275	268.74	460.649	459.061	456.383	407.171
3069	12317	Calr	7635.42	6898.52	6284.57	6580.11	11440.6	11524.4	9890.54	11281.7	7873.26	8256.09	7428.12	8728.17	11419.4	12614.8	11836.1	14551.1	4125.59	4480.45	3794.06	4341.54	5870.27	6376.76	5797.74	6350.9	4706.91	4877.67	4482.73	5169.74	7018.29	7831.54	6576.59	8289.74
627	21413	Tcf4	71.9987	132.187	74.1657	88.401	22.9731	52.3838	41.2474	52.0896	57.5741	80.5472	63.9528	57.545	83.7426	76.9429	57.4369	54.692	81.9653	72.4138	78.3546	80.0297	79.5383	62.7699	66.4241	70.7055	80.4734	82.3316	94.6043	86.3062	85.1909	65.9961	80.7824	68.1929
9902	18451	P4ha1	371.987	250.605	175.656	257.516	390.543	419.071	391.851	373.308	406.617	446.231	319.764	398.149	586.198	650.167	598.985	723.15	196.44	214.383	189.75	204.489	331.294	351.842	317.58	333.226	283.066	293.503	294.096	297.905	402.596	458.414	432.979	542.233
9018	212919	Kctd7	21.2326	8.2617	7.80691	7.68705	17.2298	14.9668	8.83873	13.0224	10.7951	8.05472	25.5811	13.9974	10.1506	15.3886	41.0264	15.1922	15.9089	20.9619	16.6779	23.3539	26.2822	25.7687	30.4031	26.6021	18.1613	25.1394	23.6511	26.1895	37.7863	35.9097	32.464	54.9516
6978	67815	Sec14l2	79.1159	44.0624	39.0346	34.5917	74.6627	67.3507	61.8711	47.7488	79.1644	77.3253	89.534	76.2082	154.797	150.039	196.927	154.961	36.6596	34.9365	35.2438	31.6132	67.7804	67.7254	55.1882	67.5553	84.2309	61.2773	67.1827	56.8431	126.069	111.935	89.8421	110.234
8703	100504663	Atg14	51.2789	38.5546	58.5519	30.7482	74.6627	89.8009	58.9249	56.4304	32.3854	46.7174	28.7788	24.8843	38.0648	61.5543	90.258	66.8458	31.1261	38.4302	40.908	31.898	67.4346	52.1981	69.7288	66.1552	35.0701	37.3949	32.9058	29.1656	69.0459	68.9077	58.8881	63.2274
4821	240067	Zfp952	51.5449	30.2929	15.6138	32.6699	34.4597	59.8673	41.2474	47.7488	21.5903	27.386	31.9764	31.1054	38.0648	65.4014	36.9237	21.2691	57.7561	58.4392	61.362	64.3655	66.0513	75.9846	67.4155	73.5057	55.7364	50.2788	50.0443	61.9024	61.4886	90.5829	84.9348	82.4274
3810	26441	Psma4	2283.99	2032.38	1081.26	2375.3	3181.78	3135.55	3125.97	2895.31	1583.29	1457.9	1554.05	1869.43	2601.1	2419.85	2432.86	2354.8	2185.74	2278.5	2252.14	2257.64	3098.53	3190.69	3135.48	3188.4	1561.56	1517.16	1577.77	1529.41	2196.41	2371.01	2164.89	2197.4
8083	54651	Usp27x	29.3043	16.5234	3.90346	21.1394	28.7164	22.4502	29.4624	17.3632	21.5903	14.4985	28.7788	24.8843	40.6025	19.2357	20.5132	45.5767	22.4799	27.314	21.0834	25.9171	35.2735	37.3316	28.4203	31.8525	35.0701	34.2524	31.8775	30.6536	50.4962	45.615	50.2059	45.3516
8073	110524	Dgkq	101.103	88.1248	101.49	71.1052	109.122	179.602	111.957	177.973	118.747	83.7691	79.941	122.866	121.807	130.803	135.387	145.845	59.8312	67.6498	59.7886	71.7704	85.0714	106.709	108.724	100.458	69.8271	59.3919	75.4092	73.8067	102.367	113.552	110.604	90.7032
2471	22130	Ttf1	177.549	88.1248	93.683	88.401	126.352	172.118	147.312	156.269	89.9596	80.5472	92.7316	121.311	144.646	111.567	143.592	133.692	164.968	200.726	181.569	201.925	215.791	224.65	234.963	248.869	206.663	235.682	210.803	237.193	263.817	296.659	270.659	318.785
619	67039	Rbm25	1186.32	801.385	788.498	884.01	1286.5	1257.21	1620.43	1284.88	791.644	792.584	892.142	802.519	1174.93	1042.58	1136.43	1069.53	1208.38	1254.54	1236.68	1291.87	1441.37	1489.96	1772.3	1615.38	1251.25	1142.27	1152.05	1184.18	1297.79	1237.43	1363.11	1212.25
9039	70081	Zfp995	62.3855	2.7539	0	15.3741	5.74328	7.48341	23.57	4.3408	7.19677	16.1094	9.59292	24.8843	12.6883	19.2357	20.5132	27.346	83.0028	92.4229	94.4031	85.7258	112.045	128.183	121.943	141.761	101.453	108.728	94.947	117.257	101.68	134.58	92.862	126.124
905	245867	Pcmtd2	161.632	129.433	148.331	130.68	195.272	239.469	238.646	217.04	89.9596	141.763	163.08	155.527	139.571	119.261	110.771	188.384	137.301	156.579	153.248	148.667	154.581	174.104	180.766	161.013	169.401	166.234	149.105	177.969	156.298	175.019	173.644	169.489
5910	73998	Herc3	49.6858	24.7851	3.90346	53.8093	28.7164	44.9004	67.7636	52.0896	46.779	30.6079	63.9528	55.9897	50.7531	38.4714	41.0264	57.7305	49.4559	38.7478	43.4254	42.4357	57.0601	46.2515	64.1108	51.454	53.2314	49.9646	63.755	49.9981	62.8627	68.5842	72.1002	65.5447
8111	69697	Camsap3	52.7768	30.2929	62.4553	42.2787	68.9194	67.3507	61.8711	78.1343	104.353	111.155	111.917	79.3187	86.2802	126.956	147.695	170.153	10.0295	8.25772	6.60822	12.2465	16.2535	12.2236	11.2359	13.301	21.2926	17.9118	18.1668	24.1062	28.855	31.057	30.5765	24.8275
1063	53334	Gosr1	365.62	228.574	148.331	226.768	344.597	314.303	347.657	373.308	205.108	252.918	185.463	244.177	304.518	292.383	324.108	243.076	455.478	421.779	447.156	445.432	571.292	563.608	539.324	558.994	394.539	362.636	357.508	387.485	453.092	439.974	459.025	441.599
4215	170460	Stard5	50.6926	30.2929	62.4553	53.8093	22.9731	104.768	85.4411	104.179	14.3935	38.6627	19.1858	60.6555	35.5272	57.7071	41.0264	27.346	50.1476	54.628	61.362	52.9734	54.2935	75.3239	70.7202	66.5052	28.8076	42.1085	40.104	39.5818	37.0993	47.2325	46.8085	45.3516
2128	11843	Arf4	701.648	641.659	296.663	711.052	815.546	920.459	1098.95	894.204	770.054	697.539	601.157	886.503	954.158	1065.66	1091.3	1005.73	515.655	473.866	514.497	513.215	634.231	674.281	625.907	618.498	535.446	508.445	520.323	517.242	631.031	678.725	651.544	687.557
1524	71853	Pdia6	1902.31	1734.96	1737.04	1604.67	2682.11	3053.23	2689.92	2860.58	1921.54	2010.46	1953.76	2059.18	2697.53	2850.73	2592.87	3403.06	1134.37	1175.14	1055.43	1209.84	1465.23	1585.11	1502.64	1621.33	1256.26	1286.51	1166.1	1324.95	1670.84	1958.21	1597.91	2110.01
5836	230828	Il22ra1	13.0305	13.7695	3.90346	7.68705	22.9731	22.4502	8.83873	8.68159	17.9919	20.9423	22.3835	15.5527	12.6883	15.3886	24.6158	6.07689	7.60859	7.94011	9.44031	5.41126	6.22473	11.2325	7.60077	4.90038	14.4038	8.79879	16.4529	8.92823	18.8932	15.852	23.4042	12.9103
3414	408068	Zfp738	37.6347	5.5078	3.90346	11.5306	5.74328	7.48341	23.57	4.3408	14.3935	16.1094	6.39528	7.77634	0	3.84714	0	9.11534	75.3942	72.7314	70.4876	64.0807	56.0226	44.2693	58.4929	55.3043	70.1402	73.5328	75.752	74.6995	50.8398	68.9077	58.5106	77.7929
720	110593	Prdm2	287.569	242.343	320.083	278.655	407.773	486.421	430.152	529.577	251.887	281.915	281.392	205.296	314.669	373.173	237.953	349.421	240.017	228.675	221.218	230.691	301.9	273.875	270.984	267.071	213.865	225.94	207.718	235.408	261.756	239.074	254.804	250.923
58	19944	Rpl29	4379.39	5628.97	6147.94	5327.12	3411.51	2836.21	2657.51	2982.13	6102.86	6070.04	6718.24	5738.94	4986.49	4770.46	4599.06	4755.17	3802.22	3689.61	3637.04	3437.01	3910.52	4174.2	3752.14	4045.97	3767.53	3801.71	3858.89	3360.88	4370.84	4555.03	4420.38	4444.46
6732	319165	H2ac7	184.461	327.714	136.621	290.186	442.233	366.687	456.668	447.102	269.879	270.639	255.811	318.83	299.443	215.44	299.493	246.114	70.2066	73.6843	59.474	64.9351	104.783	96.7978	97.8186	102.908	52.9183	53.107	49.7015	51.1885	64.2367	46.5855	46.0535	41.0482
9727	68423	Ankrd13d	23.6272	13.7695	3.90346	5.76528	11.4866	0	11.785	21.704	43.1806	35.4408	19.1858	21.7738	35.5272	34.6243	12.3079	57.7305	12.1046	7.62251	9.44031	12.5313	15.5618	20.4828	13.8797	12.951	29.4339	37.0806	26.736	30.9512	41.2214	49.1736	37.7488	47.3378
1030	66552	Sppl2a	798.269	537.011	238.111	524.641	723.654	531.322	895.658	750.958	687.291	587.995	601.157	615.887	913.555	723.263	865.657	704.92	728.696	823.231	759.945	859.536	932.327	911.816	942.165	896.42	918.712	898.105	906.624	941.035	1080.69	1086.02	1089.05	1070.89
3971	57438	Marchf7	869.351	658.182	308.373	620.729	953.385	883.042	910.39	859.478	885.202	736.201	716.272	755.861	1045.51	888.69	1050.28	704.92	769.851	725.409	778.826	698.907	1042.64	1056.52	1078.32	1012.63	1016.41	892.449	926.505	943.714	1024.7	987.354	1058.48	960.66
2110	18846	Plxna3	49.5395	22.0312	74.1657	32.6699	45.9463	67.3507	53.0324	82.4751	28.7871	37.0517	57.5575	32.6606	45.6778	53.86	61.5396	63.8074	44.9599	41.6062	52.5511	46.7077	44.6106	42.9478	38.3343	53.2042	60.7465	48.0791	55.8714	54.4622	39.8474	47.556	51.3383	54.2895
2696	235497	Leo1	341.895	267.128	261.532	251.751	396.287	463.971	430.152	438.42	226.698	328.633	185.463	278.393	332.433	438.574	397.956	413.229	258.692	308.712	293.279	285.088	386.279	380.914	399.536	399.731	263.026	284.39	282.099	307.131	395.039	392.418	406.554	445.24
9150	14369	Fzd7	9.79705	2.7539	19.5173	5.76528	17.2298	14.9668	8.83873	13.0224	7.19677	11.2766	19.1858	10.8869	10.1506	23.0829	0	15.1922	5.87937	5.08167	5.97886	4.27205	6.22473	6.27699	8.92264	8.40066	6.26252	8.48455	7.19815	11.9043	6.87024	10.3523	10.9471	11.5862
2291	66190	Acer3	678.019	448.886	191.269	478.519	654.734	673.507	680.582	581.667	503.774	612.159	537.204	597.223	824.738	673.25	709.756	613.766	599.35	560.254	627.151	568.752	765.642	770.088	826.832	762.009	754.947	764.866	793.168	779.434	868.054	949.18	919.938	927.887
209	58810	Akr1a1	1600.91	1112.58	964.154	972.411	1355.41	1960.65	1723.55	1731.98	1158.68	1006.84	1173.53	1032.7	1360.18	1585.02	1616.44	1619.49	1709.86	1756.67	1804.99	1778.03	2061.42	2113.69	2068.4	2155.12	1488.91	1499.88	1629.87	1546.96	1896.53	1946.89	1887.06	1910.39
100	72674	Adipor1	1400.59	487.44	655.781	447.77	241.218	246.952	244.538	238.744	518.167	542.888	623.54	527.236	474.541	527.059	504.624	625.92	2131.79	2132.71	2133.2	2067.39	2172.09	2142.77	2017.84	2095.61	2328.41	2270.72	2436.4	2265.98	2619.96	2549.26	2554.46	2593.32
7083	20499	Slc12a7	112.663	134.941	132.718	111.462	218.245	276.886	203.291	156.269	82.7628	104.711	124.708	119.756	142.109	176.969	180.516	170.153	61.2146	61.6153	59.1593	54.1126	93.0252	95.8067	80.6343	88.9069	53.5446	52.1643	52.4437	51.4861	92.0612	79.9071	87.9547	93.0204
7495	386649	Nsfl1c	1133.02	1131.85	1225.69	1093.48	1774.67	2035.49	1767.75	2044.52	748.464	897.296	898.537	958.046	1471.84	1600.41	1534.39	1428.07	782.648	793.059	767.183	782.639	1143.97	1310.9	1207.2	1333.25	595.253	609.002	611.843	586.585	990.345	1071.47	938.435	989.459
2525	70099	Smc4	1726.73	1189.69	456.704	1270.28	1602.38	1586.48	1726.5	1610.44	1212.66	1134.1	1151.15	1402.85	1471.84	1254.17	1333.36	1163.73	2054.67	2029.81	2028.72	2126.63	2534.5	2534.91	2636.81	2584.95	1867.48	1864.4	1886.94	2034.74	1863.9	1983.77	1962.94	1967
7430	26466	Zfp260	313.969	66.0936	46.8415	86.4793	143.582	89.8009	120.796	108.52	107.951	86.991	83.1387	90.2056	121.807	161.58	139.49	124.576	315.757	379.537	385.479	363.979	527.373	541.143	565.101	550.243	447.144	486.133	479.191	512.183	627.596	648.639	642.107	683.584
4571	11750	Anxa7	1151.67	1040.97	1003.19	985.864	1671.3	1676.28	1694.09	1632.14	1291.82	1332.25	1272.66	1340.64	1890.55	1735.06	1883.11	1744.07	612.146	584.075	620.858	594.384	910.194	966.987	955.053	916.722	791.27	802.261	822.646	764.554	1039.81	1072.11	1015.44	1039.11
9240	16554	Kif13b	40.2003	24.7851	11.7104	13.4523	34.4597	44.9004	23.57	13.0224	53.9757	46.7174	51.1623	54.4344	63.4414	46.1657	73.8475	48.6151	21.0966	13.0218	19.8247	18.5122	29.0488	30.3939	37.0124	25.552	48.8477	41.1658	50.7298	37.4986	70.7634	61.7905	75.1201	61.5723
1645	286940	Flnb	934.594	630.643	714.333	482.362	660.478	1025.23	1045.92	1193.72	813.235	985.898	908.13	911.388	1027.75	1123.37	964.12	1060.42	758.438	734.302	724.072	763.557	860.742	962.362	1011.56	1026.63	960.671	1055.86	1051.27	1028.53	1043.59	1183.72	1098.87	1161.27
3571	53322	Nucb2	87.2557	41.3085	35.1311	69.1834	57.4328	67.3507	82.4948	108.52	68.3693	59.6049	86.3363	77.7634	124.345	111.567	90.258	157.999	62.2521	72.7314	73.9491	80.5993	78.8466	79.9491	69.0679	96.2575	91.4328	91.7588	80.8935	102.972	103.741	139.433	97.3919	145.986
5732	21950	Tnfsf9	43.3175	38.5546	27.3242	48.044	57.4328	59.8673	53.0324	95.4975	50.3774	54.7721	47.9646	24.8843	81.2049	111.567	86.1554	109.384	11.4129	11.1162	12.9018	13.9554	23.8615	24.7776	29.4117	26.252	18.1613	17.9118	21.2517	16.3684	38.4733	50.7911	32.464	47.6688
6663	14538	Gcnt2	66.0705	46.8163	46.8415	44.2005	68.9194	82.3175	61.8711	95.4975	50.3774	32.2189	70.3481	37.3265	63.4414	107.72	90.258	85.0765	49.4559	61.6153	56.3272	57.2454	75.3885	82.592	72.703	85.0566	49.787	56.5637	50.387	49.9981	68.3589	92.8475	62.2855	94.3446
886	67121	Mastl	427.807	203.789	97.5864	265.203	373.313	299.336	318.194	364.627	392.224	335.076	383.717	399.704	477.079	442.421	430.777	434.498	364.867	349.047	394.92	404.421	429.161	447.318	481.492	443.485	551.728	547.725	560.427	595.811	621.413	621.14	627.385	604.136
4095	213993	Ccdc186	462.058	236.835	89.7795	221.003	281.421	344.237	338.818	321.219	237.493	251.307	287.788	279.948	380.648	353.937	328.211	319.037	468.62	444.011	475.477	450.274	632.156	635.628	710.507	669.952	613.414	617.172	648.862	626.464	752.978	770.602	782.91	753.101
5718	74718	Snx16	52.7887	57.8319	27.3242	40.357	63.1761	142.185	73.6561	30.3856	50.3774	30.6079	31.9764	41.9923	58.366	46.1657	36.9237	48.6151	47.3808	57.1688	54.4391	54.3974	76.0801	83.2527	59.1538	68.6054	37.262	36.7664	39.0757	38.9866	50.1527	52.0852	51.7158	49.9861
121	76551	Ccdc6	564.731	451.64	647.974	407.413	327.367	246.952	223.915	230.062	349.043	410.791	390.112	390.373	294.368	392.409	328.211	385.883	800.977	799.411	815.643	784.063	900.166	883.734	824.518	863.517	612.475	621.572	642.692	668.129	715.879	651.227	749.313	696.826
3389	13626	Eed	590.182	548.026	448.898	501.58	970.615	658.54	813.163	855.137	464.191	462.341	492.437	541.234	781.597	654.014	713.859	625.92	464.47	468.784	485.232	474.482	724.836	705.666	683.408	687.804	405.185	415.743	392.128	394.925	638.245	629.875	607.378	585.929
1443	56289	Rassf1	301.957	253.359	253.725	305.56	407.773	366.687	577.464	390.672	295.067	314.134	262.207	326.606	334.97	311.619	352.827	303.845	243.475	240.427	250.168	208.191	271.122	284.777	335.756	286.672	273.985	263.964	282.099	261.3	276.871	279.513	274.056	271.779
10000	100910	Chpf2	76.2331	38.5546	81.9726	63.4181	86.1492	142.185	85.4411	99.8383	57.5741	83.7691	79.941	66.8766	142.109	153.886	131.284	124.576	30.0885	37.7949	38.0759	33.0372	54.6393	58.1448	54.5273	64.055	42.272	43.3655	51.0726	36.0105	97.9009	89.2889	97.3919	97.9859
2204	380705	Tmem102	192.667	195.527	202.98	159.506	246.961	381.654	297.571	290.833	205.108	215.866	233.428	203.74	378.11	350.09	406.161	431.459	71.59	64.4737	82.7601	70.916	100.633	88.5386	85.9217	96.6075	103.332	100.243	97.6892	104.163	168.321	199.282	168.737	170.482
5304	70218	Kif18b	963.934	1060.25	1455.99	816.749	1843.59	1803.5	1708.82	1831.82	1047.13	1080.94	1106.38	993.817	1228.22	1292.64	1316.95	1449.34	489.717	450.998	441.492	445.432	835.844	840.787	804.36	845.316	492.234	512.844	513.468	526.766	736.146	630.198	614.173	666.04
9111	19153	Prx	14.2337	5.5078	23.4207	11.5306	28.7164	22.4502	20.6237	8.68159	7.19677	4.83283	6.39528	3.11054	2.53765	0	16.4106	12.1538	16.6006	12.3866	13.5311	10.5377	23.1698	20.1524	27.4289	19.9516	10.02	14.4552	14.0535	13.3923	18.2061	19.7341	18.4969	15.5586
4550	192119	Dicer1	1344.64	1955.27	1245.2	832.123	1056.76	4819.31	948.691	1662.52	2266.98	2005.63	1729.92	1769.9	1152.09	1819.7	2190.81	3633.98	862.884	829.583	850.572	825.929	899.474	790.571	835.093	817.314	720.816	741.298	696.507	759.792	738.55	726.605	747.048	752.77
78	75617	Rps25	7257.9	10599.8	7974.76	11432.6	5404.43	5492.82	5073.43	4987.57	7830.08	7853.35	8262.71	8219.6	6851.67	5728.4	6014.47	5536.05	7613.44	8136.08	7882.97	7703.93	8425.18	8751.78	8244.52	8772.03	5770.6	5819.46	5963.5	5704.54	7010.39	7252.46	7200.58	7481.69
1374	67920	Mak16	764.573	671.952	394.249	801.374	1142.91	1010.26	1131.36	907.226	561.348	720.092	575.575	746.529	918.631	754.04	804.117	935.842	694.803	740.019	744.84	771.247	906.045	909.834	874.419	935.973	584.293	580.406	581.679	612.179	689.085	646.05	643.994	711.391
9408	19015	Ppard	260.114	223.066	448.898	199.863	545.612	591.189	341.764	412.376	241.092	201.368	223.835	163.303	299.443	315.466	315.903	291.691	183.99	168.33	168.982	163.192	299.133	291.715	254.13	250.27	154.997	161.835	139.85	158.03	238.741	212.223	215.546	187.696
6655	69743	Casz1	53.2279	22.0312	62.4553	32.6699	68.9194	52.3838	50.0862	60.7711	100.755	64.4378	105.522	49.7686	126.883	138.497	135.387	97.2303	11.7587	10.481	10.699	9.1137	21.0949	20.8132	21.4804	17.5014	45.4033	28.9103	34.6197	29.4632	58.0535	61.1435	60.0206	41.7102
2235	18145	Npc1	441.32	319.452	331.794	347.839	516.895	561.256	601.034	499.192	597.332	620.213	706.679	634.55	817.125	754.04	849.246	762.65	182.26	181.67	200.449	195.945	261.439	258.348	260.079	274.421	315.631	320.213	327.344	337.189	409.466	384.654	423.164	429.351
5402	259302	Srgap3	36.9762	2.7539	7.80691	13.4523	5.74328	22.4502	5.89249	26.0448	53.9757	59.6049	70.3481	34.2159	58.366	61.5543	53.3343	63.8074	16.2547	11.4338	9.12563	9.96811	8.64546	13.2147	11.2359	11.9009	66.0696	66.6194	57.5852	68.4498	62.5192	59.5259	58.8881	75.4757
4319	78100	Msantd4	357.757	247.851	160.042	249.829	361.827	329.27	374.173	412.376	179.919	161.094	179.068	152.416	400.949	319.313	303.595	240.037	377.663	422.414	394.92	413.534	560.918	569.554	624.915	571.245	308.429	302.616	300.951	306.833	460.306	482.031	452.985	469.406
4949	13591	Ebf1	32.5324	2.7539	0	17.2959	0	7.48341	8.83873	34.7264	35.9838	38.6627	19.1858	35.7712	38.0648	15.3886	24.6158	39.4998	11.7587	13.3394	16.6779	13.9554	10.7204	13.5451	15.8625	11.5509	73.5846	74.4755	91.1766	90.7703	65.6108	61.7905	64.1729	61.2412
5854	108671	Dnajc9	281.42	173.496	214.69	174.88	304.394	329.27	309.356	273.47	169.124	170.76	175.87	178.856	332.433	257.759	332.314	288.652	220.995	257.895	239.155	243.222	359.651	382.897	332.451	355.628	243.925	226.569	241.652	251.478	426.642	409.564	405.044	441.93
2240	68549	Sgo2a	394.873	443.378	160.042	547.702	620.275	606.156	704.152	664.142	568.544	626.657	613.947	763.637	553.209	557.836	545.651	628.958	182.952	179.764	199.191	191.673	234.119	206.48	240.911	222.267	247.996	249.823	267.017	277.37	244.58	222.252	239.327	231.061
732	67163	Ccdc47	1060.04	850.955	519.16	941.663	1315.21	1159.93	1349.38	1336.97	967.965	898.907	863.363	1056.03	1350.03	1238.78	1243.1	1315.65	858.388	877.224	915.395	919.63	1095.55	1077	1153	1075.63	996.367	962.211	880.916	982.403	1123.97	1128.4	1189.46	1218.53
3022	73389	Hbp1	142.044	154.218	74.1657	136.445	201.015	217.019	235.7	173.632	208.706	211.034	182.266	206.851	218.238	292.383	246.158	179.268	70.5524	64.7913	62.6207	56.1062	82.9965	79.6187	90.2178	73.5057	101.453	98.6722	103.859	98.2105	122.977	118.728	134.386	107.586
9833	114255	Dok4	32.7573	13.7695	39.0346	17.2959	34.4597	37.417	26.5162	39.0672	25.1887	28.997	19.1858	15.5527	30.4518	34.6243	12.3079	27.346	30.0885	23.1851	31.4677	29.3347	43.919	48.5641	37.3429	44.4535	37.8883	30.7958	37.0191	30.356	48.0917	40.7623	51.3383	49.655
6470	56085	Ubqln1	1229.59	1071.27	1139.81	1081.95	1659.81	1900.79	1735.34	1905.61	910.391	953.679	1020.05	1001.59	1517.52	1565.79	1476.95	1643.8	863.921	902.632	854.348	861.53	1438.61	1580.81	1448.11	1483.42	753.381	768.009	785.969	810.683	1262.41	1218.34	1220.8	1280.11
2484	326622	Upf2	344.208	187.265	160.042	242.142	287.164	336.753	327.033	386.331	219.501	206.201	239.823	262.84	398.412	361.631	315.903	331.191	330.974	331.262	326.005	358.282	472.734	453.595	427.956	456.436	344.126	362.007	321.175	355.939	441.069	474.266	484.317	468.082
4770	68628	Fbxw9	294.272	223.066	242.014	180.646	327.367	321.787	350.603	355.945	197.911	240.031	287.788	231.735	388.261	411.644	500.522	394.998	186.756	173.412	166.464	158.92	301.9	327.064	316.919	323.775	205.411	202.372	232.055	195.826	420.115	420.564	406.554	430.013
6612	214150	Ago3	108.513	63.3397	23.4207	30.7482	51.6895	29.9336	64.8174	95.4975	61.1725	35.4408	41.5693	49.7686	50.7531	61.5543	86.1554	57.7305	139.376	138.793	119.263	131.009	212.333	166.175	175.809	182.014	144.664	151.779	133.337	155.351	182.061	176.313	184.214	167.834
1958	75739	Mpp7	213.143	123.926	89.7795	165.271	258.448	231.986	209.183	195.336	208.706	169.149	211.044	189.743	195.399	215.44	192.824	200.537	215.116	188.34	205.799	188.255	255.214	240.838	250.825	236.968	265.844	237.882	247.822	229.158	274.809	240.045	239.705	234.041
3397	20250	Scd2	1781.88	961.111	1385.73	912.837	1343.93	1728.67	1797.21	2157.38	1223.45	1385.41	1279.06	1262.88	1748.44	2227.5	2149.78	2564.45	1247.81	1213.25	1259.65	1451.36	1478.03	1616.49	1821.21	1930.75	1603.52	1813.18	1901.68	2082.66	2528.93	2921.3	3034.62	3206.06
3599	50797	Copb2	1507.23	1297.09	854.857	1431.71	1786.16	1878.34	2168.44	2061.88	1507.72	1399.91	1474.11	1594.15	1959.07	2054.37	1833.88	1786.61	1092.18	1105.9	1106.09	1149.18	1524.37	1600.3	1706.54	1593.67	1159.51	1124.67	1192.15	1216.32	1454.77	1568.06	1495.98	1546.26
5805	12908	Crat	180.018	55.078	27.3242	53.8093	80.406	74.8341	67.7636	95.4975	39.5822	86.991	73.5458	82.4293	157.335	188.51	131.284	191.422	157.014	139.746	154.821	140.123	196.425	209.123	190.68	209.666	260.208	279.99	291.011	252.074	447.252	408.917	410.329	427.364
6806	18669	Abcb1b	848.643	556.288	343.504	578.45	827.033	591.189	933.96	876.841	680.094	596.049	649.121	765.192	789.21	646.32	767.193	780.881	799.248	789.565	722.184	788.62	1379.82	1404.39	1297.75	1323.45	775.613	742.241	737.639	787.47	1083.44	1092.17	1075.84	1127.17
7818	231130	Tnip2	62.2656	49.5702	39.0346	38.4352	57.4328	29.9336	64.8174	95.4975	53.9757	40.2736	51.1623	57.545	58.366	88.4843	94.3607	66.8458	38.7347	40.3358	32.0971	48.4165	61.9015	64.0914	73.6944	79.8062	66.3827	70.0761	62.384	60.712	85.878	85.0833	95.1269	79.7791
9362	66569	Gdpd1	10.6455	5.5078	0	5.76528	11.4866	0	5.89249	8.68159	7.19677	14.4985	6.39528	6.22108	12.6883	3.84714	8.20528	6.07689	12.1046	11.4338	11.9577	14.525	22.4782	15.5273	17.5148	14.7011	12.2119	9.11304	11.6541	8.63062	16.4886	17.7931	15.8545	15.5586
1918	74477	4933427D14Rik	182.582	68.8475	85.876	103.775	103.379	157.152	156.151	151.928	122.345	117.599	102.325	125.977	106.581	176.969	98.4633	115.461	196.786	212.795	192.582	212.748	235.502	229.936	253.139	245.719	235.471	250.137	249.536	259.216	260.382	263.661	286.891	282.703
1599	68098	Rchy1	224.515	145.957	117.104	157.584	252.704	217.019	235.7	234.403	219.501	260.973	274.997	272.172	263.916	265.453	344.622	249.153	157.014	181.67	170.87	174.584	194.004	215.4	203.568	223.317	212.613	218.084	220.743	230.348	254.886	244.25	272.924	274.427
402	70396	Asnsd1	470.432	118.418	109.297	130.68	68.9194	59.8673	44.1937	47.7488	140.337	133.708	150.289	135.308	124.345	80.79	143.592	103.307	906.46	953.767	918.227	937.287	805.757	862.261	829.475	838.315	749.937	767.695	724.614	744.614	729.619	773.514	694.955	756.081
8813	74568	Mlkl	1162.64	922.557	866.567	853.262	1349.67	1421.85	1505.53	1423.78	1097.51	1006.84	972.083	979.819	1756.06	1665.81	1567.21	1491.88	835.216	790.835	788.266	809.411	1312.73	1379.95	1269.33	1205.84	883.016	861.339	861.036	857.705	1340.38	1383.01	1263.45	1319.83
7660	73095	Slc25a42	17.2517	5.5078	39.0346	11.5306	22.9731	22.4502	26.5162	26.0448	14.3935	17.7204	15.9882	24.8843	17.7636	30.7771	20.5132	36.4614	5.53352	11.1162	7.23757	7.40488	11.7578	18.1702	11.8969	17.8514	7.2019	10.37	10.2831	9.22584	18.8932	15.852	16.6095	22.8413
8628	208638	Slc25a38	69.754	44.0624	58.5519	24.9829	80.406	59.8673	53.0324	56.4304	43.1806	41.8845	28.7788	26.4396	86.2802	69.2486	98.4633	112.423	60.8688	56.216	60.7327	59.2391	77.4634	90.5208	77.9905	97.6576	69.2009	60.6488	61.6984	66.0689	103.397	115.17	102.299	119.172
9001	328967	Arhgef37	8.13477	13.7695	0	0	0	14.9668	2.94624	13.0224	14.3935	11.2766	15.9882	1.55527	10.1506	3.84714	4.10264	3.03845	5.18768	4.44646	9.12563	7.12008	10.0287	5.94662	8.26171	10.1508	10.02	12.2555	8.91199	6.24976	9.61833	13.2639	10.9471	11.5862
9806	26390	Mapkbp1	215.09	104.648	81.9726	121.071	132.096	172.118	167.936	217.04	179.919	170.76	179.068	155.527	233.464	327.007	242.056	279.537	154.939	157.849	144.437	166.325	263.168	263.964	250.164	252.72	234.845	237.567	237.539	216.658	322.214	321.569	338.984	340.634
1437	66352	Blzf1	348.192	286.406	179.559	222.924	310.137	366.687	430.152	373.308	392.224	333.465	351.741	340.604	461.853	465.504	418.469	407.152	246.242	258.53	267.475	287.082	340.977	314.18	348.644	347.577	354.772	357.294	367.106	338.38	403.97	406.329	413.349	401.875
3206	244556	Zfp791	15.0024	13.7695	11.7104	13.4523	11.4866	29.9336	23.57	17.3632	14.3935	8.05472	9.59292	6.22108	27.9142	7.69429	8.20528	18.2307	14.8713	12.7042	16.9926	18.2274	10.3746	11.2325	14.2101	16.4513	15.9694	14.4552	13.7108	11.9043	19.2367	17.1461	18.1194	17.8758
2663	14873	Gsto1	29214.6	26677	22925	26458.8	40312.1	41420.7	43566.1	40030.8	31575.8	33170.9	32331.4	30022.9	45934.1	50813.1	47336.2	44406.9	15026.3	14973.8	16238.9	15972	20866	23828.1	23930.2	21967.7	20368.5	20586	20695.4	19082	27975.6	31953.1	28424.5	26783.9
3004	11477	Acvr1	289.379	269.882	218.594	240.22	396.287	389.137	447.829	342.923	611.725	423.678	406.1	390.373	558.284	469.351	553.856	443.613	111.708	87.6589	104.473	111.928	124.841	140.406	137.475	139.311	232.026	192.631	225.885	199.695	247.329	242.633	275.189	235.696
8313	236899	Pcyt1b	76.8379	30.2929	42.938	23.0611	40.203	29.9336	50.0862	56.4304	61.1725	53.1611	63.9528	59.1002	81.2049	134.65	86.1554	109.384	50.4934	41.2886	50.9777	56.9606	90.6045	81.6009	80.6343	91.0071	82.9784	85.7882	105.916	91.9608	133.97	135.551	132.876	147.641
4127	218341	Rfesd	27.3547	5.5078	7.80691	1.92176	0	14.9668	5.89249	8.68159	14.3935	14.4985	12.7906	9.33161	2.53765	7.69429	12.3079	3.03845	59.8312	60.0273	56.6419	67.7832	36.311	38.3227	47.5874	41.6533	53.5446	48.7076	50.7298	43.7483	28.5115	31.057	29.0666	33.1034
3780	19889	Rp2	162.105	57.8319	23.4207	86.4793	86.1492	104.768	120.796	86.8159	115.148	90.2129	92.7316	105.758	139.571	161.58	127.182	124.576	185.373	162.296	172.443	168.319	210.258	224.65	213.152	227.868	225.138	202.686	215.944	202.968	265.535	278.866	270.659	276.082
3821	19821	Rnf2	360.254	275.39	136.621	309.404	453.719	276.886	483.184	381.99	280.674	331.854	342.148	314.164	456.778	438.574	393.853	343.344	305.727	300.772	322.544	324.96	424.665	446.988	452.081	408.832	356.337	332.154	332.143	322.309	425.955	415.064	418.257	360.496
9352	244281	Myo16	9.94239	2.7539	3.90346	5.76528	0	7.48341	11.785	4.3408	3.59838	14.4985	12.7906	7.77634	12.6883	19.2357	16.4106	30.3845	5.87937	5.08167	3.77612	3.70244	10.0287	7.59846	7.93124	6.30049	12.2119	11.3127	10.2831	12.4995	15.458	13.5874	13.5896	15.5586
7289	14299	Ncs1	185.3	35.8007	27.3242	51.8876	45.9463	104.768	50.0862	73.7935	89.9596	86.991	102.325	107.314	180.173	115.414	176.413	112.423	167.389	158.485	173.072	160.059	233.773	231.918	226.04	210.716	297.783	272.448	297.524	290.763	440.039	381.419	439.396	402.868
4948	66413	Psmd6	1323.78	1275.06	831.436	1439.4	2056.1	1953.17	1920.95	1936	1216.25	1274.26	1186.32	1331.31	2197.61	2123.62	2104.65	1978.03	822.074	895.645	841.761	859.821	1230.77	1317.18	1240.25	1295.45	753.068	734.385	748.265	781.815	1163.82	1226.1	1135.11	1167.56
5267	17524	Mpp1	996.98	944.588	765.078	972.411	1395.62	1459.26	1561.51	1454.17	1349.39	1322.58	1259.87	1253.55	1796.66	1773.53	1862.6	1826.11	416.052	437.977	432.996	463.66	619.707	691.13	675.147	681.503	563.627	573.807	582.365	604.441	762.253	822.04	770.075	812.687
4984	107045	Lars	2826.92	3423.1	2486.5	3624.44	4629.09	5373.09	5356.27	5408.63	2461.29	2672.56	2443	2749.72	2773.66	2854.58	2613.38	2546.22	2226.55	2243.24	2234.21	2320.58	3076.4	3345.64	3515.19	3512.87	1653.93	1752.22	1699.11	1771.06	1649.2	1792.9	1664.34	1761.43
6264	15039	H2-T22	58.8441	0	11.7104	3.84352	0	7.48341	11.785	4.3408	7.19677	9.66566	6.39528	7.77634	5.07531	23.0829	8.20528	15.1922	105.483	116.243	102.27	94.2699	108.587	103.736	83.278	94.5074	114.604	103.072	94.6043	99.6986	126.756	120.993	112.491	121.82
6996	21821	Ift88	13.1491	2.7539	11.7104	1.92176	11.4866	0	5.89249	8.68159	3.59838	6.44378	3.19764	18.6632	2.53765	23.0829	16.4106	9.11534	19.3673	20.0091	20.454	16.5186	15.9077	18.831	23.7937	19.2515	17.2219	19.483	19.5378	16.666	13.397	13.911	13.2121	14.5655
6410	101148	Bmt2	310.422	82.617	85.876	124.914	114.866	142.185	167.936	217.04	190.714	149.818	195.056	208.406	307.056	300.077	324.108	294.729	271.488	253.131	276.601	271.417	357.922	411.308	405.154	388.53	433.993	443.082	420.92	422.305	554.772	591.701	603.603	611.75
9541	246727	Oas3	68.6429	46.8163	46.8415	42.2787	63.1761	67.3507	94.2798	43.408	93.558	143.374	150.289	130.643	81.2049	165.427	106.669	161.038	28.7051	16.833	21.398	24.4931	35.6193	30.0635	36.021	35.3528	69.8271	65.6767	52.4437	48.51	54.6184	63.7316	48.6959	59.586
14	68135	Eif3h	3182.03	4202.45	4133.76	4420.05	2808.47	2738.93	2628.05	2752.06	3843.07	3842.1	3910.72	3584.9	3255.81	3031.55	2892.36	2822.72	2787.51	2880.04	2705.59	2780.25	3648.73	3859.36	3550.55	3759.99	2377.57	2299.94	2381.22	2308.24	3014.66	3174.61	3118.05	3129.59
1399	109620	Dsp	2466.38	1018.94	854.857	926.289	1389.87	1541.58	1670.52	1441.14	1525.71	1556.17	1605.22	1279.99	1745.91	1658.12	1624.64	1677.22	2293.99	2045.69	2277.63	2123.49	4040.54	4470.21	4454.38	4150.27	3163.51	3209.67	3109.94	2949.29	3917.75	4459.92	4186.72	4088.6
1800	19324	Rab1a	2305.81	2010.35	1104.68	2185.04	3066.91	2723.96	2990.44	2795.47	2302.97	2197.33	2100.85	2332.9	3641.53	3189.28	3208.26	2980.72	1715.39	1690.61	1706.81	1798.82	2183.15	2212.47	2217.77	2216.02	1866.86	1848.69	1820.79	1891.89	2342.41	2327.01	2425.36	2385.43
6222	213053	Slc39a14	142.211	88.1248	179.559	132.602	172.298	217.019	206.237	238.744	86.3612	99.8785	108.72	99.5372	159.872	142.344	147.695	176.23	120.7	128.63	130.591	114.206	168.759	186.988	185.393	178.864	83.2915	93.9585	93.5759	101.187	138.779	146.227	138.161	144
9872	12325	Camk2g	168.137	126.679	101.49	146.054	212.501	217.019	232.753	169.291	147.534	122.432	127.906	93.3161	246.152	219.287	209.235	164.076	150.097	124.819	131.535	122.465	215.791	218.373	211.169	201.616	138.089	127.897	126.482	108.627	208.512	204.135	198.559	188.358
2276	71592	Pogk	155.027	33.0468	15.6138	28.8264	34.4597	44.9004	47.1399	39.0672	10.7951	6.44378	12.7906	18.6632	20.3012	15.3886	0	6.07689	429.194	459.256	416.947	428.059	427.432	415.603	360.21	395.181	134.018	133.239	125.111	147.018	148.397	143.962	141.18	167.503
1160	100503572	Bbip1	138.776	60.5858	23.4207	34.5917	40.203	52.3838	73.6561	69.4527	86.3612	70.8815	41.5693	46.6581	76.1296	65.4014	36.9237	63.8074	208.199	224.546	223.421	227.273	198.846	192.935	189.358	184.464	232.966	225.312	224.856	220.825	225	215.134	218.943	247.944
958	69605	Lnpk	478.101	338.73	382.539	409.335	666.221	606.156	668.798	507.873	399.42	446.231	409.298	444.807	586.198	527.059	570.267	510.459	413.285	395.1	423.87	397.585	514.232	507.115	557.5	499.839	398.609	392.175	420.92	433.019	513.894	485.589	502.436	492.578
1549	56190	Rbm38	191.9	167.988	331.794	146.054	396.287	314.303	297.571	312.537	133.14	132.097	140.696	130.643	388.261	411.644	369.237	422.344	67.7857	73.3667	67.6556	72.9096	164.264	166.175	149.372	156.812	58.2415	52.7928	54.5003	57.1407	204.39	154.315	175.154	179.42
7448	74025	Nphp3	13.6936	5.5078	11.7104	0	5.74328	7.48341	5.89249	8.68159	10.7951	11.2766	9.59292	15.5527	10.1506	15.3886	8.20528	18.2307	14.5255	17.7859	16.9926	14.8098	17.2909	16.8488	22.1414	12.951	20.0401	18.8546	19.1951	13.9876	20.9542	20.7047	16.987	16.2206
4857	22019	Tpp2	991.883	886.756	569.905	1116.54	1430.08	1287.15	1508.48	1428.12	967.965	1126.05	965.688	1082.47	1220.61	1050.27	1152.84	1181.96	786.106	744.783	780.084	799.727	1080.68	1106.4	1193.98	1113.79	681.675	658.024	671.827	743.722	825.115	864.097	869.732	853.736
4904	20913	Stxbp4	67.3344	55.078	7.80691	42.2787	74.6627	74.8341	55.9786	43.408	39.5822	32.2189	60.7552	69.9871	76.1296	42.3186	73.8475	54.692	85.0779	84.8004	62.6207	80.5993	98.5583	87.2172	94.1835	91.7072	58.8677	70.0761	65.1261	66.9617	86.565	75.3779	90.9746	85.0756
2524	101835	AW146154	38.5902	11.0156	11.7104	15.3741	5.74328	7.48341	29.4624	26.0448	14.3935	14.4985	19.1858	21.7738	15.2259	34.6243	4.10264	21.2691	53.2602	63.2033	73.0051	65.7895	40.8066	48.5641	41.639	60.9048	60.7465	61.2773	61.0129	73.5091	57.023	54.6733	58.1331	70.8412
2995	228410	Cstf3	335.288	333.222	238.111	345.917	442.233	501.388	506.754	559.963	352.642	420.456	390.112	499.241	624.263	588.613	512.83	540.843	158.051	185.799	171.814	215.311	237.923	224.32	222.736	268.821	208.542	221.227	204.633	238.681	249.046	224.84	224.228	281.379
6902	14865	Gstm4	11.7794	5.5078	15.6138	7.68705	11.4866	14.9668	20.6237	4.3408	10.7951	14.4985	22.3835	17.108	20.3012	19.2357	16.4106	6.07689	7.95444	7.62251	8.81096	6.83528	8.64546	7.59846	9.58358	9.10071	11.2725	10.0558	17.1385	9.82105	10.9924	10.3523	12.0796	10.262
8771	73692	Cplane1	107.385	55.078	23.4207	40.357	63.1761	44.9004	58.9249	82.4751	57.5741	54.7721	54.3599	60.6555	76.1296	57.7071	45.129	63.8074	124.85	121.007	118.948	116.769	188.125	165.514	171.513	175.014	153.745	133.239	146.02	153.566	184.466	163.049	190.254	184.386
326	67210	Gatad1	589.821	154.218	222.497	149.897	63.1761	22.4502	85.4411	47.7488	161.927	183.648	207.847	161.748	121.807	138.497	123.079	176.23	1047.22	1096.05	1081.54	1096.49	868.35	838.804	764.373	809.263	1121.62	1096.71	1124.28	1152.63	1064.89	981.531	1042.62	1077.85
1536	76260	Ttc8	26.2394	13.7695	3.90346	21.1394	28.7164	7.48341	11.785	43.408	43.1806	19.3313	28.7788	35.7712	32.9895	30.7771	36.9237	18.2307	23.8633	27.9492	26.4329	27.6259	16.9451	9.58067	16.5234	23.1018	39.1408	36.4521	35.3052	38.9866	33.6642	25.8808	30.954	24.8275
1570	66442	Spc25	397.923	250.605	81.9726	259.438	315.881	351.72	385.958	290.833	334.65	317.356	313.369	443.252	380.648	380.867	356.929	325.114	361.062	419.556	413.486	399.294	472.042	467.14	459.681	461.686	455.598	471.05	492.216	549.086	521.451	528.94	515.271	559.447
4350	20469	Sipa1	120.653	46.8163	156.138	46.1223	109.122	119.735	111.957	130.224	151.132	153.04	115.115	132.198	177.636	223.134	164.106	224.845	54.9894	63.5209	67.3409	61.5175	84.0339	79.9491	76.6686	75.6059	105.523	125.697	120.655	117.555	184.466	160.461	153.638	147.31
1204	66234	Msmo1	1530.64	955.604	601.132	893.619	1292.24	1309.6	1358.22	1393.4	2040.28	2020.12	2065.68	2325.13	2603.63	2635.29	2650.3	2549.26	684.428	714.61	747.673	815.676	861.434	929.656	965.628	1021.73	1460.11	1436.72	1581.88	1557.98	1809.62	2073.06	2001.06	2095.11
678	27418	Mkln1	792.195	688.475	343.504	655.321	895.952	1002.78	936.906	915.908	766.456	795.806	613.947	751.195	999.836	838.677	779.501	805.188	733.192	754.946	727.533	768.684	870.425	864.573	883.011	840.766	763.088	696.99	688.28	757.709	848.474	893.859	826.321	850.756
9405	14766	Adgrg1	100.64	66.0936	132.718	65.3399	109.122	134.701	150.258	125.883	158.329	165.927	150.289	122.866	246.152	269.3	307.698	328.152	17.9839	20.6443	19.1953	18.2274	32.5069	26.7598	31.725	28.0022	37.262	41.48	37.7046	30.0584	60.8016	54.0263	74.3651	56.2757
4573	77110	Gpbp1l1	219.288	49.5702	39.0346	48.044	63.1761	104.768	67.7636	65.1119	53.9757	54.7721	89.534	43.5475	58.366	107.72	86.1554	54.692	307.802	296.007	311.845	314.423	374.522	400.406	357.236	361.228	377.63	353.837	395.898	378.855	410.497	386.919	385.038	399.558
5618	20975	Synj2	65.125	41.3085	27.3242	49.9658	68.9194	59.8673	76.6024	47.7488	75.566	78.9362	79.941	74.6529	83.7426	96.1786	106.669	103.307	40.4639	45.4175	41.852	40.7269	55.6768	56.8233	48.2484	48.6538	59.494	74.1613	56.5569	62.7952	76.2596	86.0538	67.5703	87.3929
2904	12211	Birc6	1430.63	1261.29	964.154	1210.71	1636.84	2072.9	2062.37	1688.57	1219.85	1214.65	1128.77	1331.31	1471.84	1338.81	1357.97	1494.92	1213.22	1191.97	1169.34	1249.43	1863.27	1561.32	1741.24	1658.43	1302.92	1260.43	1255.56	1380.6	1488.44	1452.89	1569.97	1535.66
9438	72972	Ccser2	175.182	46.8163	31.2277	53.8093	40.203	97.2843	82.4948	65.1119	68.3693	64.4378	89.534	54.4344	96.4309	96.1786	98.4633	54.692	181.569	187.069	204.855	184.837	288.413	268.589	283.542	295.423	280.248	272.763	282.784	262.192	341.794	332.569	370.316	354.206
8544	103554	Psme4	1510.47	906.033	558.194	857.106	1114.2	1152.44	1346.43	1423.78	960.768	857.022	956.095	922.275	1525.13	1281.1	1435.92	1276.15	1475.38	1453.04	1484.96	1572.4	2346.72	2414.99	2319.23	2318.23	1456.98	1528.16	1461.57	1590.42	2121.87	2193.72	2177.35	2336.77
126	67281	Rpl37	3196.36	3574.56	2654.35	3803.17	1924	1593.97	1638.11	1627.8	3314.11	2954.47	3159.27	3046.77	3263.42	2654.53	2359.02	2014.49	3688.78	3806.81	3785.25	3561.75	3848.96	4072.12	3703.56	3950.06	3312.87	3327.83	3349.88	3095.12	3900.23	4014.77	3974.95	4112.1
3240	75786	Ckap5	1501.38	1275.06	843.147	1339.47	1728.73	1766.08	2124.24	1866.54	1493.33	1520.73	1365.39	1664.14	1542.89	1469.61	1341.56	1470.61	1302.8	1265.97	1236.05	1356.8	1781.31	1706.68	1884.99	1884.2	1390.59	1399.64	1416.66	1511.55	1373.36	1360.36	1396.7	1463.5
5054	69116	Ubr4	1227.73	1112.58	1362.31	1093.48	1780.42	2110.32	1806.05	1922.97	1227.05	1280.7	1256.67	1183.56	1403.32	1358.04	1206.18	1267.03	834.524	754.946	769.071	768.114	1487.02	1303.63	1345.67	1268.85	909.944	906.59	876.46	931.512	1136.34	1141.34	1128.31	1126.51
9277	28018	Ubfd1	636.921	338.73	468.415	367.056	574.328	680.99	580.41	659.801	385.027	352.797	393.31	351.491	652.177	757.887	726.167	859.88	527.76	555.173	475.162	575.018	802.299	885.056	796.098	888.369	509.456	549.925	512.782	572.002	955.65	973.443	951.647	1066.26
3445	269623	Rbm48	74.4439	46.8163	15.6138	65.3399	103.379	44.9004	73.6561	69.4527	86.3612	72.4925	67.1505	59.1002	93.8932	50.0129	65.6422	75.9612	73.3192	81.942	77.7252	76.8969	91.2961	84.2438	91.8702	82.9565	76.0896	84.217	84.3212	67.8545	82.7864	87.0243	86.0672	89.3791
3080	225876	Kdm2a	1477.03	878.494	800.209	876.323	1544.94	1549.07	1305.19	1258.83	1245.04	1266.2	1279.06	1178.89	1586.03	1469.61	1538.49	1500.99	1164.11	1188.48	1170.91	1187.34	1736.36	1717.58	1765.03	1735.44	1641.72	1713.25	1710.07	1728.51	2067.6	2004.79	2030.13	1949.13
1078	109929	Zbtb25	40.7828	63.3397	105.393	94.1663	11.4866	14.9668	38.3012	34.7264	46.779	41.8845	57.5575	55.9897	38.0648	23.0829	20.5132	18.2307	51.8768	44.147	53.8098	46.9925	35.6193	28.742	35.3601	33.2526	41.3326	38.3376	47.9877	35.1177	32.2901	25.8808	21.8943	27.1448
290	80986	Ckap2	794.44	732.538	538.677	812.905	1257.78	1219.8	1187.34	976.679	766.456	765.198	735.458	811.85	872.953	750.193	754.885	759.612	697.916	729.855	702.359	734.223	856.938	847.064	848.642	810.313	661.009	657.081	672.513	713.961	693.894	693.283	665.134	701.129
775	414872	Zyg11b	400.722	245.097	152.235	251.751	350.34	314.303	397.743	355.945	291.469	335.076	274.997	311.054	307.056	403.95	291.287	306.883	440.607	423.684	460.372	408.977	505.933	482.337	529.08	506.49	489.103	463.194	465.48	467.244	545.497	533.145	590.013	522.04
7153	70028	Dop1b	46.4843	38.5546	23.4207	48.044	51.6895	59.8673	58.9249	69.4527	46.779	88.6019	57.5575	55.9897	68.5167	100.026	73.8475	63.8074	23.1716	20.6443	27.0622	20.7906	32.5069	28.4117	31.064	29.0523	46.6558	30.1673	34.9624	34.2249	41.2214	46.5855	48.6959	40.7171
10227	30938	Fgd3	36.2521	35.8007	19.5173	11.5306	22.9731	0	50.0862	34.7264	35.9838	28.997	31.9764	34.2159	68.5167	57.7071	53.3343	57.7305	28.7051	20.9619	18.8806	17.373	33.8902	31.7153	27.0984	38.853	42.272	32.6812	38.3901	36.6057	59.084	52.7322	47.186	54.2895
1270	26443	Psma6	1579.25	1544.94	1147.62	1844.89	2469.61	2432.11	2642.78	2283.26	1770.4	1631.89	1586.03	1916.09	2717.83	2300.59	2289.27	2373.03	962.487	1017.92	1017.98	1034.69	1267.77	1332.7	1242.56	1320.65	904.308	910.361	992.659	910.977	1278.55	1303.75	1217.4	1291.69
3003	76464	Knl1	639.976	396.562	160.042	463.144	465.206	516.355	689.421	555.622	507.372	526.779	454.065	618.997	540.52	400.103	443.085	489.19	659.527	697.142	718.408	713.717	860.397	817	906.144	883.469	805.987	886.793	837.042	977.344	651.642	714.635	722.512	761.046
2851	27377	Yme1l1	1740.37	1258.53	429.38	1416.34	1544.94	1496.68	1912.11	1740.66	1784.8	1657.66	1614.81	1847.66	2393.01	2031.29	2010.29	1744.07	1398.25	1497.82	1511.39	1505.75	1693.47	1695.45	1875.41	1701.48	1928.54	1950.82	1907.85	1925.52	2025	2117.7	2136.96	2197.73
1165	16784	Lamp2	1596.37	1451.31	862.664	1533.57	1912.51	1825.95	2301.02	2244.19	1863.96	1849.36	1573.24	1749.68	2453.91	2485.25	2170.3	2215.03	1129.53	1138.93	1176.89	1213.83	1325.18	1385.23	1529.41	1417.26	1222.76	1258.86	1244.25	1213.64	1335.92	1491.71	1463.52	1448.6
1515	19330	Rab18	941.6	647.167	363.021	797.531	1073.99	942.909	957.529	1020.09	989.555	1031	914.525	1004.7	1413.47	1181.07	1165.15	1151.57	751.867	787.659	757.113	763.842	953.768	960.71	928.946	954.525	895.227	860.082	841.841	841.039	1024.7	990.266	1158.13	1066.59
4840	215653	Rassf2	16.2892	22.0312	31.2277	24.9829	0	7.48341	0	8.68159	7.19677	1.61094	12.7906	1.55527	5.07531	7.69429	4.10264	0	54.2977	51.1343	58.5299	52.6886	12.1037	17.1791	16.5234	14.3511	15.0301	15.7121	12.6825	14.5828	8.93131	10.6758	7.17227	8.93791
9081	106759	Ticam1	48.3642	44.0624	15.6138	38.4352	63.1761	44.9004	50.0862	56.4304	50.3774	64.4378	73.5458	55.9897	68.5167	96.1786	86.1554	69.8843	25.9384	17.1506	20.1393	26.2019	29.7404	32.3761	33.7078	33.6026	35.6964	33.9382	35.9907	51.4861	58.397	57.2614	57.3781	72.4964
500	56442	Serinc1	1469.1	1269.55	792.402	1254.91	1791.9	1698.73	1909.17	1766.7	1691.24	1490.12	1522.08	1581.71	2040.27	1827.39	1595.93	1646.84	1085.95	1151	1196.09	1217.53	1324.49	1277.86	1420.68	1347.61	1353.64	1315.73	1365.59	1378.22	1489.81	1633.4	1574.12	1531.36
75	114641	Rpl31	4471.15	3453.39	2857.33	3670.56	1918.26	1825.95	1511.42	1640.82	3411.27	3194.5	3328.74	3588.01	3024.88	2654.53	2465.69	2412.53	5975.17	6188.53	6022.6	5887.74	6185.31	6512.21	6033.36	6573.86	5539.2	5451.17	5478.13	5261.41	6385.2	6772.05	6547.9	6833.86
125	19982	Rpl36a	3929	3560.79	2345.98	3997.26	1912.51	1743.63	1558.56	1554.01	3713.53	3676.17	3766.82	3874.18	2989.36	2542.96	2564.15	2294.03	4577.95	4964.79	4643.37	4666.79	4791.32	5050.01	4683.07	5200.01	4709.42	4665.25	4679.83	4650.42	5396.57	5418.15	5692.14	5915.9
2267	20585	Hltf	219.931	201.035	128.814	194.098	275.678	202.052	300.517	338.582	104.353	133.708	115.115	160.193	223.314	165.427	155.9	164.076	270.451	262.659	278.489	283.094	326.453	359.44	342.696	367.529	169.401	178.49	166.929	189.278	176.222	192.812	189.121	201.93
3781	13885	Esd	5080.35	5370.11	3692.67	6097.75	8184.18	7992.28	8237.7	8069.54	5332.8	5589.98	5397.62	5934.91	9460.37	8621.45	8250.4	7893.88	2663.7	2855.58	2821.39	2783.95	3768.73	3973.67	4005.94	3999.06	2660.95	2613.24	2728.44	2587.4	3910.88	4091.11	3923.23	3978.03
2281	74243	Slx4ip	86.5232	16.5234	23.4207	55.7311	40.203	67.3507	53.0324	60.7711	79.1644	56.383	38.3717	82.4293	78.6673	73.0957	45.129	66.8458	83.6945	108.938	107.62	102.529	96.8292	93.4942	93.192	100.108	135.897	131.982	135.394	155.649	114.046	121.64	120.419	143.669
1403	208292	Zfp871	407.652	286.406	113.2	267.125	379.057	404.104	362.388	351.605	277.075	318.967	351.741	318.83	307.056	350.09	237.953	246.114	471.041	421.144	416.947	444.293	583.742	445.666	497.355	456.436	550.789	475.135	473.364	563.669	570.23	521.175	589.258	585.267
9526	100383	Bsdc1	111.907	55.078	78.0691	49.9658	114.866	119.735	76.6024	82.4751	89.9596	62.8268	76.7434	94.8714	114.194	126.956	94.3607	170.153	87.4988	82.2596	79.928	84.3018	133.486	137.433	122.604	125.31	117.735	141.723	130.252	105.651	175.191	197.018	160.81	181.075
1490	229503	Rrnad1	50.167	24.7851	42.938	38.4352	45.9463	104.768	38.3012	52.0896	50.3774	38.6627	47.9646	32.6606	43.1401	53.86	45.129	57.7305	51.8768	53.3576	49.719	59.5239	40.4608	41.296	47.5874	52.8541	58.5546	65.0482	49.3587	56.2478	51.8703	52.0852	56.2457	52.3033
912	15490	Hsd17b7	267.575	201.035	171.752	174.88	269.934	269.403	350.603	243.085	208.706	249.696	217.44	230.18	271.529	338.549	291.287	291.691	199.899	213.113	215.868	238.95	247.952	218.373	245.207	251.67	272.42	307.015	279.014	308.322	340.42	373.978	409.574	393.268
9618	26446	Psmb3	3122.13	3800.38	3759.03	3720.53	6225.72	6233.68	5901.33	5712.49	3695.54	3703.56	3495.02	3522.68	5823.92	6278.54	6231.91	6283.51	1017.82	1081.44	1101.37	1119.56	1684.83	1778.7	1736.28	1730.54	1064	1023.49	1078.35	1035.97	1749.51	1856.63	1659.44	1680.33
1701	77987	Ascc3	625.847	371.777	214.69	405.492	534.125	501.388	553.894	616.393	503.774	496.171	450.867	505.462	502.455	580.919	434.88	458.805	631.167	646.643	649.808	623.719	827.198	848.715	876.071	840.766	746.179	729.357	709.532	759.792	822.367	836.275	865.202	857.377
1098	109181	Trip11	757.881	404.823	304.47	480.44	608.788	763.308	651.12	616.393	446.199	483.283	514.82	617.442	629.338	665.556	640.012	556.036	841.787	830.218	887.074	860.106	1063.05	1009.94	1102.11	1003.18	901.177	918.217	844.24	987.462	905.497	947.886	984.488	1025.87
4111	80890	Trim2	83.0458	22.0312	31.2277	32.6699	40.203	22.4502	47.1399	56.4304	43.1806	30.6079	25.5811	35.7712	53.2907	42.3186	28.7185	33.4229	130.384	126.407	130.906	135.851	144.898	137.433	131.857	158.212	105.523	107.471	102.145	123.805	123.664	118.081	119.664	133.076
5998	242700	Ifnlr1	17.1676	2.7539	3.90346	7.68705	11.4866	22.4502	2.94624	4.3408	7.19677	20.9423	6.39528	7.77634	15.2259	15.3886	4.10264	18.2307	13.488	11.7514	12.5871	13.1009	10.7204	14.2058	10.575	10.5008	39.767	32.0527	32.9058	22.9158	35.0382	46.262	32.464	43.0344
3979	56876	Nsmf	39.2668	5.5078	23.4207	5.76528	17.2298	22.4502	14.7312	8.68159	10.7951	4.83283	3.19764	12.4422	12.6883	19.2357	8.20528	12.1538	65.3647	70.1906	62.9354	65.7895	55.6768	63.4307	52.5445	52.8541	65.7565	72.2758	69.9249	69.045	71.107	67.6137	61.908	69.5171
5232	268902	Robo2	23.8626	24.7851	19.5173	15.3741	5.74328	52.3838	29.4624	34.7264	43.1806	17.7204	12.7906	18.6632	22.8389	19.2357	41.0264	6.07689	21.4424	16.1978	19.51	20.7906	21.7866	19.4917	21.4804	22.0517	28.8076	31.11	26.0504	24.7014	26.1069	22.3222	30.199	24.1655
7005	224014	Fgd4	109.034	19.2773	19.5173	19.2176	11.4866	22.4502	47.1399	21.704	28.7871	16.1094	12.7906	23.329	25.3765	26.93	20.5132	30.3845	156.668	162.931	157.968	163.192	208.874	194.256	199.603	204.416	189.754	181.946	184.41	188.088	214.351	193.459	218.943	216.165
1993	56496	Tspan6	35.3872	44.0624	23.4207	44.2005	51.6895	67.3507	67.7636	52.0896	21.5903	25.7751	19.1858	21.7738	25.3765	30.7771	8.20528	21.2691	48.7642	57.804	50.0336	54.3974	45.9939	50.5463	47.5874	53.2042	21.2926	20.1115	18.5095	18.1541	16.8321	21.3517	28.6891	19.1999
5678	235442	Rab8b	67.6979	11.0156	23.4207	48.044	51.6895	52.3838	41.2474	47.7488	32.3854	43.4955	15.9882	27.9948	32.9895	34.6243	28.7185	39.4998	101.333	100.045	86.2215	93.7003	98.5583	114.638	117.647	128.81	80.7865	87.6737	76.0947	79.7589	93.4352	103.523	98.9018	106.262
6480	26444	Psma7	3443.32	3533.25	3216.45	3520.67	5869.64	5417.99	5438.77	5182.91	2831.93	2759.55	2999.39	3048.33	5202.19	5008.98	4553.93	4256.86	2282.23	2324.23	2304.06	2265.04	3413.92	3633.39	3466.28	3537.38	1951.4	1917.82	1985.66	1891.59	3168.55	3427.92	3120.31	3212.35
7782	67893	Tmem86a	11.0473	16.5234	35.1311	13.4523	5.74328	22.4502	17.6775	73.7935	0	6.44378	19.1858	7.77634	7.61296	3.84714	0	0	5.87937	8.89293	7.23757	4.84165	7.26219	12.8844	16.5234	14.3511	5.63627	7.22758	3.77046	3.8689	2.06107	3.55862	4.52985	4.30344
215	78294	Rps27a	9406.74	12450.4	6190.88	13141	6311.87	5365.6	5721.61	5955.57	12983	11932.3	12250.2	13420.4	11198.7	8190.57	8217.58	8146.08	8402.31	8834.17	8703.97	8859.09	9638.31	10156.2	9574	10102.8	8607.84	8444.33	8412.92	8303.55	10196.5	10926.6	10330	10640.7
1543	240725	Sulf1	573.947	553.534	441.091	493.893	591.558	890.525	898.605	772.662	528.962	587.995	549.994	461.915	619.188	607.849	488.214	680.612	490.408	466.561	489.952	513.215	591.696	586.073	706.872	564.944	480.335	523.214	502.157	499.088	527.978	581.025	539.808	562.426
111	68077	Nop53	2147.32	2773.18	4001.04	2636.66	1941.23	2357.27	1758.91	2109.63	2266.98	2134.5	2164.8	1895.87	1733.22	1769.69	1690.29	1841.3	2232.08	2121.92	2095.12	1943.21	2876.52	2884.11	2677.78	2780.27	1569.7	1587.87	1609.99	1456.79	1960.77	2018.38	1853.47	1824.33
926	193116	Slu7	530.69	385.546	296.663	388.196	505.409	666.023	659.959	477.488	367.035	336.687	345.345	370.154	449.165	492.434	438.982	449.69	568.569	599.32	604.18	589.827	694.404	691.791	789.489	706.005	536.072	538.926	515.525	544.92	567.825	657.373	585.106	633.267
8911	320528	Vps13c	92.8801	77.1092	66.3588	103.775	103.379	179.602	114.904	164.95	136.739	99.8785	99.1269	121.311	124.345	107.72	65.6422	78.9996	55.6811	70.8258	59.1593	52.4038	99.2499	82.592	93.5225	85.0566	70.1402	79.5034	65.4689	88.3895	86.565	84.4362	82.6698	79.7791
6426	67839	Gpsm1	122.734	77.1092	101.49	59.5746	103.379	149.668	109.011	117.202	205.108	135.319	134.301	91.7609	220.776	176.969	160.003	148.884	86.4613	78.1307	62.306	46.4229	106.512	89.8601	79.6429	65.8051	168.775	133.239	144.306	105.948	205.077	153.991	164.585	123.145
2309	71254	Naif1	63.9023	44.0624	27.3242	36.5135	51.6895	89.8009	38.3012	65.1119	82.7628	66.0487	73.5458	54.4344	58.366	69.2486	102.566	100.269	45.9974	61.2977	44.0548	56.1062	48.4146	43.9389	44.6132	59.5046	67.3221	67.2479	63.755	73.8067	79.6947	84.7597	86.0672	94.3446
3472	233056	Zfp790	123.261	57.8319	42.938	63.4181	97.6358	134.701	91.3336	56.4304	71.9677	59.6049	47.9646	80.874	86.2802	84.6371	77.9501	94.1918	129.692	141.652	159.856	162.053	177.405	173.774	177.792	181.314	149.987	166.234	176.526	165.767	176.565	169.843	175.532	189.351
7467	18854	Pml	624.063	688.475	1167.13	697.599	1240.55	1436.81	1299.29	1341.31	403.019	560.608	572.378	547.455	751.146	919.467	808.22	1014.84	314.373	366.833	316.25	338.631	499.362	522.312	478.849	485.138	242.046	260.193	247.479	255.943	394.352	378.831	370.693	426.371
1749	212547	Nepro	290.502	242.343	191.269	307.482	373.313	389.137	430.152	425.398	165.526	236.809	274.997	237.956	281.68	250.064	295.39	294.729	300.885	272.187	267.79	295.056	358.614	358.119	375.081	362.278	241.107	242.281	239.938	236.598	274.809	254.603	268.771	261.186
3684	18811	Prl2c2	1301.96	773.846	425.477	1085.8	1229.06	1152.44	1355.27	1145.97	1604.88	1419.24	1701.15	1496.17	1758.59	1754.3	1690.29	1622.53	927.211	1005.54	812.496	854.694	1005.29	1098.8	1255.45	1092.44	1569.39	1126.87	1735.1	1552.02	1306.03	1931.68	1481.64	1391
8930	22123	Psmd3	2634.67	2943.92	3841	2648.19	4795.64	5417.99	4823	4787.9	2648.41	2487.3	2337.48	2373.34	3991.73	4378.05	4184.69	4691.36	1309.02	1237.07	1215.6	1228.64	2073.53	2062.49	1936.54	1995.86	1182.68	1141.01	1170.56	1062.16	2042.18	2026.79	1856.86	1783.94
5872	78286	Nav2	958.964	757.323	1171.04	772.548	1510.48	1593.97	1296.35	1267.51	895.997	876.353	828.189	716.979	1322.12	1650.42	1312.84	1397.69	566.494	544.692	575.23	528.025	901.895	810.062	738.597	735.407	590.243	673.108	601.902	620.81	1145.96	1082.14	1149.45	1094.07
7649	14026	Evl	10.6047	5.5078	0	7.68705	5.74328	7.48341	2.94624	17.3632	10.7951	8.05472	6.39528	6.22108	10.1506	0	0	0	21.0966	13.9746	17.9366	12.8161	21.4408	17.5095	19.1672	15.0512	16.5957	10.9985	11.9969	12.2019	13.0534	10.6758	13.967	11.9172
8815	319167	H2ac11	257.742	355.253	54.6484	349.761	287.164	396.621	444.883	442.761	233.895	265.806	236.625	367.043	403.487	280.841	246.158	218.768	200.936	198.503	193.526	205.343	273.542	271.232	288.168	292.273	191.007	191.06	200.177	185.112	192.367	173.402	186.101	163.531
3162	18618	Pemt	47.3461	30.2929	62.4553	44.2005	51.6895	52.3838	73.6561	78.1343	50.3774	33.8298	44.767	26.4396	45.6778	42.3186	28.7185	42.5383	47.0349	48.9111	47.8309	50.695	53.6019	58.1448	50.8921	45.1535	44.777	33.624	42.5034	40.177	48.4352	49.4971	45.676	53.2964
3200	26420	Mapk9	341.17	156.972	121.007	199.863	264.191	306.82	247.485	269.129	100.755	120.821	153.487	166.414	317.207	269.3	225.645	221.807	424.352	422.096	404.989	424.357	555.73	582.108	535.689	553.393	345.691	354.151	341.741	372.01	532.443	528.94	522.066	535.612
4117	234362	Zfp868	77.0038	30.2929	7.80691	30.7482	28.7164	37.417	38.3012	47.7488	32.3854	46.7174	22.3835	26.4396	17.7636	38.4714	45.129	24.3076	112.4	120.69	120.521	107.086	116.195	125.54	116.986	130.56	115.544	132.61	120.312	109.222	118.855	121.963	113.246	130.758
7031	230162	Zfp189	12.4373	0	7.80691	7.68705	5.74328	7.48341	5.89249	17.3632	3.59838	11.2766	3.19764	9.33161	15.2259	7.69429	12.3079	9.11534	8.30028	8.25772	8.1816	5.98087	22.824	18.1702	16.5234	19.9516	12.8382	12.5697	17.1385	12.7971	29.542	18.1166	24.1592	26.4827
8865	319181	H2bc8	778.658	636.151	429.38	605.355	884.466	793.241	992.884	872.5	539.757	599.271	658.714	608.11	611.575	707.874	607.19	571.228	800.977	800.999	798.021	780.646	1166.45	1170.82	1340.05	1240.15	730.523	740.041	778.771	698.783	778.054	732.104	781.4	682.922
2708	22330	Vcl	947.098	991.404	1022.71	1072.34	1401.36	1751.12	1744.18	1606.09	1299.02	1233.98	1378.18	1328.2	1517.52	1535.01	1456.44	1583.03	429.54	384.937	414.744	418.091	601.724	571.867	593.191	563.894	511.022	479.22	479.191	523.194	585.344	653.168	614.928	615.391
9228	66251	Arfgap3	221.364	137.695	195.173	186.411	218.245	276.886	271.054	316.878	284.272	275.471	223.835	216.182	284.217	300.077	348.724	416.267	123.121	107.668	112.34	117.339	164.955	199.873	186.384	194.615	196.643	175.347	183.724	179.16	235.649	243.603	241.215	249.268
190	329384	Ptrh1	213.283	374.53	515.256	380.509	201.015	246.952	150.258	164.95	431.806	360.851	476.449	360.822	256.303	230.829	221.542	236.999	139.721	129.583	133.108	117.624	112.737	133.138	111.698	107.808	131.513	139.838	135.394	124.698	123.664	130.698	110.981	120.496
3668	67466	Pdcl	744.212	484.687	394.249	507.345	775.343	755.824	783.701	672.823	665.701	629.879	677.9	674.987	913.555	904.079	886.17	808.227	579.637	575.182	577.747	564.48	813.365	808.08	859.878	801.563	771.23	750.411	753.064	791.041	996.871	964.061	938.057	991.446
3124	214764	Edrf1	342.593	269.882	214.69	261.36	338.854	396.621	438.99	395.012	230.297	262.584	246.218	311.054	426.326	400.103	430.777	470.959	257.655	260.436	268.734	268.285	361.035	356.467	351.618	359.478	313.439	321.156	317.404	334.213	412.901	437.386	431.091	475.364
2959	226043	Cbwd1	318.605	195.527	124.911	236.377	333.11	231.986	359.442	273.47	233.895	283.526	204.649	269.062	403.487	315.466	320.006	279.537	301.231	293.149	314.048	311.575	403.57	396.111	385.656	414.082	351.954	343.153	328.03	342.844	399.504	411.829	381.263	434.316
1742	12455	Ccnt1	533.235	374.53	351.311	361.291	551.355	598.673	548.001	607.711	345.445	430.122	390.112	419.923	449.165	453.963	533.343	449.69	514.963	583.757	536.21	541.696	706.507	669.656	756.442	682.903	563.001	555.267	548.43	573.49	608.703	553.85	626.252	644.522
379	53317	Plrg1	581.674	603.104	562.098	557.311	855.749	800.725	951.637	946.294	633.315	641.156	671.505	625.218	756.221	765.581	746.68	720.112	423.66	448.775	427.331	456.255	507.316	526.937	547.916	494.589	406.438	378.977	374.647	408.02	446.222	459.708	429.581	458.813
5127	18798	Plcb4	11.4778	5.5078	0	7.68705	11.4866	7.48341	8.83873	4.3408	0	8.05472	0	7.77634	2.53765	0	0	0	25.5925	31.1252	30.5237	31.3284	31.8153	17.8399	22.4718	22.7518	9.39378	12.2555	8.91199	13.0947	7.90077	9.70531	6.79478	10.5931
4228	229841	Cenpe	961.664	771.092	468.415	728.348	861.492	1002.78	1160.82	1137.29	611.725	778.086	751.446	1000.04	730.844	750.193	566.164	656.304	991.192	1053.18	1016.72	1101.9	1415.78	1335.68	1470.91	1401.51	1028.93	1071.57	1060.18	1160.07	862.558	979.913	905.593	980.853
3703	67776	Vwa5a	91.3304	85.3709	46.8415	119.149	114.866	149.668	153.205	147.587	107.951	117.599	108.72	144.64	129.42	161.58	106.669	97.2303	61.2146	62.8857	51.2924	56.9606	62.939	70.3684	85.9217	66.8552	63.5646	64.1055	66.84	61.9024	59.084	68.2607	68.7028	69.8481
8123	242691	Gpatch3	63.3563	63.3397	66.3588	44.2005	80.406	74.8341	97.2261	86.8159	46.779	62.8268	57.5575	51.3239	86.2802	76.9429	86.1554	75.9612	40.8097	44.147	48.4603	35.3156	63.2848	60.7877	56.8405	63.3549	50.7264	42.4228	51.4154	44.3435	84.8474	69.8783	76.2525	74.1515
552	66625	Pnisr	346.438	176.25	199.076	269.047	298.651	284.369	427.205	325.56	320.256	298.025	322.962	295.501	340.046	188.51	340.519	309.922	363.137	339.837	359.361	360.276	382.475	383.227	420.356	382.58	409.882	400.974	404.81	416.651	434.542	438.357	420.521	426.702
346	12321	Calu	2996.89	1566.97	1288.14	1710.37	2193.93	2514.42	2442.44	2561.07	1910.74	1878.36	1605.22	1917.65	2626.47	2162.09	2379.53	2394.3	3306.28	3506.67	3424.63	3597.06	3915.36	3987.21	4268.99	4194.73	3554.92	3485.58	3615.87	3645.1	4128.67	4318.22	4265.23	4537.48
1345	105278	Cdk20	36.7571	24.7851	46.8415	26.9047	34.4597	67.3507	38.3012	56.4304	25.1887	40.2736	22.3835	26.4396	43.1401	38.4714	36.9237	39.4998	42.539	36.5245	38.7053	39.018	28.0113	30.7242	33.0468	31.5025	36.0095	37.3949	38.0474	40.177	37.7863	32.9981	30.199	39.393
676	26943	Serinc3	1441.1	1354.92	1217.88	1472.07	2033.12	2200.12	2262.72	2087.92	1752.41	1519.12	1544.46	1455.73	1844.87	1977.43	1977.47	1850.41	966.291	940.427	990.289	1015.89	1260.85	1298.35	1347.65	1281.1	986.347	949.013	1009.8	979.129	1269.62	1266.22	1275.53	1287.06
2969	22393	Wfs1	64.4474	30.2929	78.0691	26.9047	63.1761	59.8673	47.1399	78.1343	100.755	111.155	79.941	139.974	157.335	157.733	164.106	179.268	16.9464	18.7387	21.0834	15.6642	17.2909	16.5184	19.8281	18.9015	46.6558	38.9661	38.3901	39.2842	54.2749	54.3498	58.1331	48.993
3031	59026	Huwe1	2396.55	2106.73	1776.07	2127.39	2883.13	3008.33	3361.67	3372.8	1964.72	1897.69	2068.87	1989.19	2349.87	2031.29	2133.37	1895.99	2308.17	2093.97	2205.26	2256.21	3510.75	2796.23	3076.99	2881.77	2164.64	2115.48	2147.11	2332.35	2451.64	2200.19	2463.11	2322.2
6422	209200	Dtx3l	48.3817	33.0468	39.0346	26.9047	51.6895	74.8341	38.3012	43.408	50.3774	53.1611	12.7906	52.8791	53.2907	53.86	49.2317	51.6536	40.118	37.7949	40.2787	44.7141	50.4895	58.1448	51.553	41.6533	56.0496	60.6488	43.1889	49.7005	53.2443	59.5259	57.7556	70.5102
6447	622320	Kctd21	9.83021	2.7539	3.90346	7.68705	0	14.9668	11.785	4.3408	10.7951	17.7204	9.59292	9.33161	5.07531	0	36.9237	3.03845	9.68366	8.57532	6.29354	8.5441	3.804	10.9021	8.59217	7.35057	12.8382	15.0836	8.91199	17.5589	10.3054	11.6464	15.477	11.2551
4162	19184	Psmc5	2173.79	2302.26	2580.18	2298.43	3790.57	3824.02	3741.73	3646.27	2425.31	2421.25	2334.28	2368.67	3372.54	3743.27	3585.71	3694.75	1048.95	1046.82	1074.31	1086.52	1532.32	1596.67	1563.11	1617.13	1094.06	1079.74	1066.35	1066.63	1573.63	1732.08	1514.86	1565.13
3048	170763	Zfp87	35.926	24.7851	7.80691	24.9829	22.9731	44.9004	38.3012	21.704	28.7871	22.5532	35.1741	41.9923	40.6025	23.0829	41.0264	24.3076	34.9304	38.1125	36.5025	46.7077	34.5819	33.0368	37.0124	37.803	46.0295	43.3655	51.7581	47.022	40.5344	45.9385	54.3582	43.0344
4374	13448	Dok1	186.475	225.82	304.47	222.924	402.03	419.071	385.958	351.605	107.951	172.371	159.882	144.64	238.539	261.606	201.029	306.883	136.609	115.926	110.452	111.928	143.861	185.997	153.998	148.412	72.019	81.3888	91.1766	81.8421	113.702	123.905	100.789	103.945
4953	69065	Chac1	223.281	269.882	366.925	192.176	407.773	359.204	430.152	503.532	197.911	219.088	335.752	287.725	96.4309	157.733	135.387	188.384	186.065	148.639	112.654	116.485	249.681	269.58	322.207	296.473	126.19	158.378	204.976	179.755	66.6413	114.523	101.922	119.503
5900	22241	Ulk1	310.858	297.421	460.608	276.734	453.719	598.673	456.668	612.052	341.846	330.243	326.159	370.154	484.692	534.753	426.674	513.497	161.164	130.853	144.751	133.288	264.897	246.785	251.817	229.968	154.684	173.462	157.331	163.684	261.069	223.222	233.287	222.455
4696	208628	Kntc1	319.552	272.636	187.366	269.047	402.03	389.137	433.098	338.582	377.83	314.134	370.926	307.943	350.196	415.491	250.261	285.614	258.346	275.998	251.112	276.829	383.167	361.092	371.446	370.679	303.419	283.761	296.838	302.072	288.206	291.806	328.792	298.261
2805	245688	Rbbp7	2957.5	3381.79	1842.43	3566.79	4445.3	4213.16	5041.02	4818.28	3414.87	3130.06	3156.07	3563.12	4357.15	3616.31	3799.04	3861.87	1958.18	2004.4	2098.9	2105.83	2581.88	2625.77	2671.51	2654.26	1932.93	1920.65	1929.79	1915.4	2229.39	2322.48	2285.31	2238.45
1560	626848	Zfp971	96.2591	41.3085	0	30.7482	22.9731	7.48341	35.3549	82.4751	32.3854	30.6079	12.7906	29.5501	22.8389	19.2357	8.20528	24.3076	143.526	211.525	192.268	199.647	133.14	138.755	142.432	148.412	138.402	158.064	148.762	193.147	131.222	173.402	156.28	174.786
3920	16975	Lrp8	371.981	162.48	136.621	122.993	252.704	254.436	179.721	225.721	176.321	170.76	175.87	153.972	241.077	253.911	209.235	246.114	456.17	433.213	425.443	410.401	619.707	568.233	541.307	564.244	487.85	482.991	448.342	485.696	678.436	643.462	644.372	679.612
2233	224694	Zfp81	95.1571	19.2773	19.5173	49.9658	68.9194	67.3507	26.5162	60.7711	53.9757	59.6049	47.9646	65.3213	71.0543	53.86	53.3343	39.4998	144.217	148.957	133.108	138.13	119.999	119.924	143.093	145.611	149.048	146.437	140.878	153.566	125.382	129.404	126.081	129.103
1145	233168	AI987944	138.532	60.5858	3.90346	63.4181	51.6895	44.9004	91.3336	82.4751	82.7628	86.991	105.522	68.4318	76.1296	111.567	82.0528	112.423	159.089	174.683	179.995	180.565	116.541	134.79	158.955	166.263	231.713	236.939	230.341	262.49	208.168	228.398	251.784	249.599
2849	545725	Mterf1a	28.3935	5.5078	3.90346	5.76528	11.4866	7.48341	8.83873	4.3408	14.3935	12.8876	12.7906	18.6632	10.1506	0	12.3079	9.11534	46.6891	53.3576	53.1804	50.1254	31.1237	22.7954	25.7765	31.5025	60.7465	64.1055	59.9846	69.3426	41.9084	42.7034	49.8284	39.393
8924	212999	Tnpo2	1102.23	889.51	1217.88	1062.73	1470.28	1810.98	1697.04	1623.46	985.957	1014.89	847.375	824.293	1332.27	1511.93	1337.46	1394.65	797.173	816.879	792.042	764.127	1212.79	1300.66	1300.39	1263.6	704.534	733.442	689.651	742.829	994.123	961.797	1038.47	1035.8
3533	19346	Rab6a	1093.93	627.889	245.918	655.321	769.6	912.976	830.841	829.092	845.62	732.979	751.446	738.753	979.534	984.869	906.683	935.842	1190.05	1139.25	1199.23	1181.36	1547.19	1588.41	1599.14	1542.57	1298.53	1265.77	1230.54	1291.91	1520.38	1465.18	1548.83	1556.19
1441	72154	Zfp157	45.6657	19.2773	15.6138	24.9829	11.4866	29.9336	35.3549	43.408	25.1887	27.386	28.7788	38.8817	17.7636	19.2357	32.8211	33.4229	67.7857	68.9202	67.9702	69.7768	39.7691	44.2693	57.171	50.4039	68.5746	75.7325	94.2615	72.6163	53.5878	60.173	53.2258	67.8619
2528	72825	Mon1a	96.9446	68.8475	109.297	49.9658	137.839	164.635	97.2261	73.7935	68.3693	67.6596	89.534	57.545	93.8932	111.567	45.129	127.615	89.2281	91.7877	87.4802	86.2954	103.054	101.093	82.6171	106.408	91.4328	118.469	103.516	96.7225	129.504	113.229	120.041	121.489
3685	75458	Cklf	41.987	33.0468	15.6138	44.2005	68.9194	59.8673	32.4087	60.7711	46.779	49.9393	67.1505	66.8766	65.979	50.0129	61.5396	57.7305	32.8553	28.902	28.6356	30.1891	30.0862	33.3672	30.0726	33.2526	37.5751	29.2246	26.3932	29.4632	36.0687	32.6746	42.2786	39.724
981	68501	Nsmce2	274.66	302.929	148.331	288.264	419.26	359.204	418.367	412.376	302.264	273.86	342.148	335.938	446.627	353.937	438.982	385.883	174.306	182.623	197.302	192.812	214.062	212.096	229.675	215.967	188.815	215.885	208.404	199.397	211.26	223.222	214.036	206.234
2005	209707	Lcorl	132.129	63.3397	15.6138	92.2445	132.096	97.2843	97.2261	91.1567	68.3693	80.5472	105.522	107.314	63.4414	84.6371	73.8475	103.307	156.668	160.073	166.779	175.154	174.293	173.113	189.028	180.264	186.936	190.431	180.982	188.981	164.542	175.343	190.631	166.841
9815	21351	Taldo1	3252.31	2957.69	3267.19	2959.51	4669.29	5118.65	4560.79	4848.67	4015.8	3930.7	3977.87	3928.61	5879.74	6182.36	5653.44	5997.89	1428.69	1444.15	1369.47	1406.93	2107.07	2267.98	2196.62	2245.43	1907.56	1852.15	1807.76	1685.95	2807.18	2981.8	2673.37	2691.3
2169	108652	Slc35b3	36.2097	33.0468	15.6138	13.4523	11.4866	14.9668	41.2474	39.0672	32.3854	30.6079	38.3717	49.7686	27.9142	15.3886	20.5132	27.346	50.1476	42.559	48.7749	37.0244	36.311	39.3138	33.0468	33.6026	50.1002	50.9073	47.6449	44.0459	53.2443	53.0557	47.186	44.3585
2090	105377	Slf1	105.071	101.894	31.2277	82.6357	91.8925	119.735	135.527	121.542	79.1644	93.4347	60.7552	93.3161	93.8932	76.9429	32.8211	48.6151	121.392	128.947	122.095	122.181	139.711	125.54	142.762	143.511	124.937	118.155	117.913	137.197	106.489	111.935	112.869	118.179
1867	16330	Inpp5b	117.483	82.617	128.814	88.401	178.042	112.251	170.882	125.883	115.148	104.711	86.3363	110.424	106.581	123.109	118.976	194.461	99.2576	114.02	97.8645	100.82	94.4085	122.236	109.715	124.26	91.4328	109.356	109.001	110.71	123.664	131.992	124.193	132.413
7168	18563	Pcx	105.574	77.1092	105.393	99.9316	137.839	187.085	132.581	147.587	201.509	154.651	121.51	158.637	124.345	234.676	168.208	191.422	38.3888	41.9238	42.1667	29.6195	58.0975	76.9758	62.4585	67.5553	78.2815	71.0188	67.5255	68.4498	89.6566	86.0538	79.6499	72.4964
2430	66410	Mterf3	124.662	104.648	58.5519	115.306	126.352	127.218	167.936	173.632	151.132	103.1	124.708	119.756	88.8179	134.65	86.1554	145.845	130.384	127.042	118.319	115.63	153.889	150.317	135.162	141.061	123.685	127.582	129.567	122.317	117.825	118.728	119.286	105.931
4139	14679	Gnai3	1581.55	983.143	308.373	1058.89	1125.68	1332.05	1358.22	1163.33	1176.67	1240.43	1128.77	1180.45	1441.39	1515.77	1390.79	1309.57	1583.28	1613.75	1674.08	1618.54	1991.92	1956.44	2174.48	1994.11	1902.55	1822.92	1892.43	1949.03	2233.86	2308.25	2367.98	2230.84
3045	107371	Exoc6	63.6822	27.539	46.8415	49.9658	28.7164	52.3838	76.6024	78.1343	57.5741	78.9362	60.7552	49.7686	17.7636	61.5543	57.4369	69.8843	74.3567	74.9547	71.7464	74.0488	83.3423	81.6009	70.3897	73.1557	63.8777	65.9909	63.4123	67.5569	64.2367	82.1717	79.2724	70.1791
1318	224823	Rrp36	332.944	302.929	382.539	290.186	534.125	538.805	486.13	451.443	302.264	265.806	239.823	320.385	370.497	446.269	430.777	364.614	270.451	269.011	285.097	275.405	346.51	326.734	341.043	341.977	207.603	230.026	210.117	229.456	286.145	332.245	309.163	333.682
3067	64685	Nmi	59.0773	55.078	35.1311	59.5746	149.325	59.8673	58.9249	65.1119	93.558	53.1611	31.9764	65.3213	60.9037	61.5543	65.6422	75.9612	51.8768	46.3703	46.8869	46.4229	50.1437	49.5552	51.8835	52.5041	57.3021	51.5358	55.5286	44.3435	69.3894	57.9084	51.7158	56.9378
925	76867	Rhbdd1	348.116	363.515	390.346	351.682	585.815	531.322	559.786	603.371	273.477	298.025	303.776	228.625	236.002	357.784	303.595	352.46	367.288	361.752	351.18	336.637	377.288	432.452	402.18	425.633	227.33	249.194	240.967	248.8	232.901	254.279	244.235	299.916
1677	80912	Pum1	745.248	663.69	854.857	678.382	1148.66	1100.06	1169.66	1054.81	726.873	596.049	655.516	668.766	789.21	696.333	783.604	780.881	659.181	614.247	627.781	622.865	879.071	824.929	866.488	813.113	572.394	536.726	550.83	545.515	678.092	644.756	680.988	618.371
7817	14583	Gfpt1	570.719	459.901	284.952	534.25	660.478	651.056	698.26	750.958	554.151	573.496	495.634	668.766	819.662	761.734	689.243	735.304	421.585	399.864	392.088	419.23	596.537	613.163	629.873	602.047	482.84	478.591	453.483	514.564	560.955	594.289	591.523	603.805
4511	71978	Ppp2r2a	483.422	732.538	292.759	695.678	752.37	868.075	1057.7	937.612	708.881	844.135	722.667	877.172	875.491	780.97	931.299	759.612	146.293	164.519	168.038	151.231	275.963	166.175	182.749	160.663	198.522	210.228	196.407	248.502	201.298	217.076	231.4	230.068
2853	18472	Pafah1b1	1560.27	1079.53	601.132	1187.65	1407.1	1541.58	1579.19	1567.03	1396.17	1358.03	1231.09	1367.08	1794.12	1642.73	1669.77	1403.76	1563.57	1515.93	1496.29	1563.85	2030.3	1969.65	2036.01	2055.01	1661.13	1618.66	1589.08	1585.95	1726.49	1737.25	1720.59	1672.71
166	268417	Zkscan17	348.886	264.374	464.511	286.342	178.042	157.152	188.56	230.062	323.854	281.915	294.183	262.84	228.389	242.37	291.287	285.614	438.186	399.864	407.821	422.078	496.595	534.205	483.145	514.19	413.013	374.577	404.125	365.76	405.344	395.006	418.257	363.806
4931	26445	Psmb2	1865.46	2090.21	1838.53	2217.71	3331.1	3434.88	3099.45	3155.76	2061.87	2028.18	1905.79	1979.86	3230.43	3046.94	2945.69	3129.6	905.769	983.939	946.234	961.78	1371.86	1493.59	1334.43	1395.21	883.016	853.797	921.363	887.466	1343.47	1390.12	1296.67	1364.52
2993	212163	8030462N17Rik	499.342	289.16	179.559	288.264	419.26	291.853	412.474	473.147	320.256	309.301	227.033	301.722	413.638	319.313	303.595	319.037	549.548	569.147	588.761	567.898	741.435	737.712	773.296	792.112	615.919	581.035	632.752	622.595	717.253	690.695	716.472	715.364
2062	21754	Tesk1	86.0744	30.2929	46.8415	34.5917	0	14.9668	14.7312	26.0448	35.9838	45.1064	54.3599	27.9948	15.2259	26.93	41.0264	24.3076	143.526	116.878	146.01	131.579	116.887	110.013	112.69	112.709	149.048	163.092	166.929	135.114	176.565	142.021	161.187	145.655
2562	18783	Pla2g4a	484.828	335.976	206.883	382.43	488.179	523.838	565.679	425.398	705.283	715.259	690.691	832.069	867.878	815.594	812.322	841.65	235.866	227.087	225.623	232.399	298.096	287.751	324.52	290.873	456.538	448.11	421.949	484.803	467.863	480.413	480.165	458.482
4344	67120	Ttc14	199.579	68.8475	46.8415	73.0269	103.379	82.3175	117.85	91.1567	68.3693	57.994	70.3481	55.9897	76.1296	80.79	82.0528	48.6151	325.786	351.588	323.173	353.156	445.76	410.317	424.321	426.333	247.056	235.053	241.652	230.646	258.664	269.484	257.069	263.172
1697	19177	Psmb7	2206.46	2544.6	2139.09	2846.13	4186.85	3861.44	3945.02	3837.26	3238.54	3138.12	3188.05	3178.97	4976.34	4593.49	4902.65	4548.55	640.159	661.57	652.325	613.466	863.163	888.36	859.878	890.82	749.311	711.445	768.831	749.674	1029.5	992.207	1104.53	1100.02
8345	64602	Ireb2	384.507	435.116	284.952	522.719	654.734	688.473	704.152	572.985	395.822	380.183	412.496	451.028	515.144	457.81	553.856	394.998	263.88	243.92	236.322	244.076	551.581	294.358	301.718	291.923	242.36	227.512	215.944	285.406	270.344	252.338	311.05	262.51
5136	69538	Antxr1	49.3539	44.0624	27.3242	36.5135	63.1761	59.8673	47.1399	56.4304	104.353	64.4378	31.9764	35.7712	78.6673	38.4714	32.8211	45.5767	47.3808	33.3485	39.6493	42.4357	46.3397	46.5819	49.9007	36.4028	71.7059	48.7076	44.9027	49.7005	57.023	57.9084	51.3383	40.0551
7245	16663	Krt13	43.0111	19.2773	39.0346	26.9047	40.203	44.9004	38.3012	43.408	50.3774	22.5532	38.3717	20.2185	48.2154	88.4843	41.0264	69.8843	38.3888	28.2668	37.4466	36.17	41.4982	47.9034	40.6476	47.2537	43.8377	54.9925	44.9027	37.7962	41.9084	54.9968	61.153	45.0206
6577	56389	Stx5a	290.926	291.913	288.856	307.482	459.463	381.654	459.614	525.236	277.075	322.189	255.811	300.167	439.014	507.823	422.572	428.421	168.772	172.459	163.947	184.837	239.998	242.49	247.851	271.621	175.351	154.293	180.982	180.648	243.55	256.867	228.758	239.006
7829	228602	4930402H24Rik	108.848	38.5546	31.2277	59.5746	97.6358	67.3507	61.8711	60.7711	122.345	124.043	108.72	125.977	164.948	130.803	131.284	136.73	66.7481	66.3794	56.9565	63.5111	98.9041	81.9313	76.0077	87.8569	174.724	164.349	151.847	149.994	175.191	165.637	161.942	170.482
1554	225115	Svil	258.469	137.695	160.042	113.384	229.731	246.952	144.366	247.425	244.69	223.921	175.87	228.625	238.539	165.427	176.413	246.114	292.239	291.879	261.497	264.582	330.603	315.832	305.353	296.473	332.54	352.894	317.404	324.392	372.71	317.687	313.315	343.944
8617	72167	Thumpd2	31.6015	41.3085	11.7104	30.7482	17.2298	74.8341	44.1937	47.7488	14.3935	32.2189	12.7906	32.6606	27.9142	26.93	36.9237	36.4614	26.6301	31.7605	25.1742	33.322	34.236	45.2604	38.3343	42.7033	20.3532	22.6255	18.5095	31.844	24.7329	33.6451	31.3315	31.1172
3263	19766	Ripk1	308.184	184.511	132.718	201.785	241.218	291.853	288.732	290.833	233.895	265.806	252.614	311.054	317.207	303.924	336.416	325.114	272.872	269.329	289.188	275.69	335.444	350.52	400.528	355.978	356.964	345.038	336.942	364.867	408.092	416.682	406.932	390.951
5024	66935	Cir1	121.246	123.926	93.683	136.445	229.731	231.986	179.721	147.587	147.534	127.265	111.917	169.524	220.776	173.121	205.132	218.768	65.3647	61.9329	63.8794	56.9606	76.0801	84.9046	84.2694	82.9565	64.8171	82.0173	75.4092	80.9493	85.1909	87.9949	89.4646	99.3101
403	228829	Phf20	504.503	302.929	316.18	378.587	511.152	478.938	553.894	533.918	331.051	351.186	329.357	345.27	436.476	427.033	356.929	428.421	569.607	606.625	596.628	598.087	625.932	660.075	689.357	662.602	526.991	560.609	535.748	556.229	561.985	585.554	603.226	619.033
9901	23996	Psmc4	2247.37	2117.75	2509.92	2161.98	3221.98	3943.76	3399.97	3490	2079.87	2029.79	2008.12	2014.07	3260.89	3797.13	3569.29	3825.4	1246.43	1294.56	1286.08	1288.45	1927.25	2095.85	1990.41	1969.25	1203.66	1213.6	1263.79	1264.83	2039.43	2126.43	2012.01	2016.66
7749	271564	Vps13a	537.554	327.714	152.235	378.587	379.057	456.488	518.539	490.51	323.854	339.909	274.997	407.48	482.154	377.02	373.34	410.19	510.122	545.962	506.63	549.67	898.437	830.215	887.638	858.967	640.656	587.005	602.588	645.809	721.375	716.899	750.446	719.667
1875	217342	Ube2o	567.581	528.749	870.471	599.59	850.006	980.326	1125.47	1041.79	647.709	562.219	514.82	645.437	974.459	988.716	857.451	1099.92	243.821	232.487	241.987	237.526	475.846	453.265	464.308	436.484	220.754	235.368	218.001	246.419	413.932	397.271	397.495	392.937
1452	233545	Emsy	193.956	101.894	128.814	115.306	114.866	157.152	200.345	204.017	165.526	148.207	140.696	152.416	134.496	169.274	127.182	161.038	220.649	206.125	209.575	201.071	251.064	220.355	225.71	231.718	268.036	241.338	242.338	236.896	271.718	244.897	257.069	262.841
5869	242557	Atg4c	14.9863	2.7539	15.6138	15.3741	17.2298	22.4502	20.6237	8.68159	14.3935	8.05472	19.1858	23.329	17.7636	15.3886	28.7185	15.1922	11.067	15.8802	15.4192	14.2402	15.216	17.1791	12.5578	13.301	11.2725	11.9412	14.0535	14.5828	15.458	12.6169	12.4571	12.5793
224	54357	Epb41l4b	401.387	145.957	242.014	267.125	91.8925	149.668	111.957	104.179	129.542	191.702	134.301	141.529	111.657	165.427	160.003	145.845	688.924	623.775	682.22	636.535	643.568	684.192	740.249	651.051	591.182	606.174	615.613	563.074	589.466	643.462	607.755	582.95
1050	218543	Srek1	471.263	327.714	355.215	349.761	488.179	426.554	595.141	568.644	237.493	386.627	310.171	363.933	375.573	396.256	303.595	422.344	522.226	548.821	541.874	570.176	590.312	603.252	654.988	652.101	446.205	488.019	444.914	563.371	508.398	513.735	523.576	529.985
1817	18968	Pola1	661.277	592.089	363.021	478.519	700.681	688.473	798.432	785.684	561.348	473.617	476.449	530.347	677.554	480.893	488.214	501.344	748.755	732.396	711.17	739.634	994.574	916.111	977.195	930.723	625.939	590.462	583.393	615.155	686.68	675.166	687.028	688.55
7096	20908	Stx3	360.879	101.894	35.1311	80.714	160.812	119.735	135.527	65.1119	107.951	99.8785	102.325	116.645	190.324	188.51	155.9	124.576	469.312	468.149	460.372	482.172	679.534	676.594	640.778	651.401	485.345	486.762	487.76	487.779	718.283	729.193	745.538	733.239
2488	20333	Sec22b	393.959	297.421	261.532	355.526	528.382	426.554	465.507	512.214	334.65	341.52	271.8	368.599	494.843	592.46	566.164	604.651	326.824	312.523	333.558	315.562	398.383	389.504	412.755	445.585	262.713	280.619	294.096	295.524	423.55	461.326	378.243	460.137
73	56040	Rplp1	11321.8	10701.7	13424	10942.5	5955.78	5417.99	5211.91	5612.65	9708.44	10173.1	11102.2	10984.9	9112.72	9263.92	9280.17	9075.84	16460.5	16297.9	15636	13885.6	15003.7	15785	13920.3	15804.1	10745.9	10760.9	11243.2	9896.94	12407.6	11992.9	12238.5	12929.8
6290	114713	Rasa2	146.188	82.617	42.938	71.1052	97.6358	112.251	120.796	86.8159	104.353	75.7144	92.7316	83.9845	91.3555	146.191	98.4633	97.2303	153.901	155.944	145.695	165.471	228.932	215.07	196.629	200.916	200.401	196.402	195.378	190.767	224.657	224.516	225.738	207.227
5829	14381	G6pdx	1770.53	1544.94	1619.93	1658.48	2515.56	2679.06	2377.62	2495.96	1914.34	1937.97	2100.85	2063.84	2641.7	2862.27	2514.92	2746.76	980.817	1007.44	1026.79	1007.92	1435.49	1511.76	1562.78	1447.71	1183.93	1168.35	1169.53	1195.49	1558.17	1671.58	1598.28	1686.29
850	240476	Zfp407	256.003	132.187	109.297	117.227	201.015	209.535	173.828	177.973	176.321	125.654	185.463	197.519	167.485	200.051	147.695	127.615	322.328	327.768	309.957	312.144	347.548	324.752	317.91	336.726	368.549	355.723	361.279	359.808	346.26	351.009	354.839	390.62
4775	13849	Ephx1	1895.03	2434.45	2697.29	2085.11	3646.98	3809.05	3520.76	3811.22	1799.19	1762.37	1755.51	1670.36	2727.98	3043.09	2843.13	3159.98	1004.33	994.102	934.276	1049.78	1367.71	1480.05	1386.31	1492.87	824.774	775.551	839.784	769.911	1240.42	1302.78	1210.98	1305.93
4477	12363	Casp4	27.8633	8.2617	7.80691	15.3741	17.2298	0	23.57	17.3632	35.9838	56.383	44.767	34.2159	35.5272	57.7071	41.0264	33.4229	22.8258	16.833	19.51	12.2465	15.216	13.2147	19.8281	14.0011	49.1608	37.7091	42.8461	40.7722	32.2901	36.2332	36.6163	25.8206
5105	67846	Tmem39a	183.828	126.679	140.524	138.367	195.272	209.535	194.452	238.744	107.951	125.654	124.708	124.422	210.625	242.37	192.824	227.883	163.585	180.717	154.506	187.116	230.315	225.641	205.551	241.869	140.594	162.149	170.013	188.981	194.084	192.165	206.486	254.896
1631	66663	Uba5	221.247	162.48	136.621	157.584	195.272	254.436	291.678	190.995	122.345	212.645	137.499	205.296	228.389	192.357	242.056	188.384	216.499	235.98	227.197	213.887	236.886	259.339	256.113	251.32	210.734	226.569	236.511	252.371	254.199	283.719	263.486	315.806
6890	11555	Adrb2	265.855	170.742	93.683	136.445	223.988	239.469	194.452	208.358	280.674	265.806	239.823	234.846	431.401	380.867	434.88	458.805	137.301	141.969	134.367	118.763	194.004	196.569	192.663	163.113	327.217	300.102	297.524	247.312	476.451	473.296	423.541	423.061
6497	100042342	Gm10375	13.2111	0	0	1.92176	0	0	2.94624	0	17.9919	4.83283	6.39528	21.7738	15.2259	7.69429	32.8211	12.1538	3.8043	3.49365	2.20274	3.98724	2.07491	1.98221	1.98281	2.45019	37.5751	32.6812	41.1323	39.2842	27.4809	22.9692	30.5765	32.1103
6866	214593	Duox2	20.2886	11.0156	15.6138	9.60881	11.4866	29.9336	20.6237	8.68159	39.5822	25.7751	3.19764	20.2185	30.4518	23.0829	36.9237	33.4229	18.3298	11.4338	18.8806	15.3794	14.5244	17.8399	16.8539	22.4017	19.4138	20.4258	20.5661	22.9158	16.4886	23.6163	26.4241	23.8344
6028	101056136	Gm17026	18.3896	0	3.90346	0	0	0	2.94624	0	17.9919	25.7751	19.1858	18.6632	10.1506	23.0829	32.8211	24.3076	4.49599	4.76407	4.72015	5.41126	1.72909	1.65184	4.95702	2.45019	45.0902	49.0218	50.387	41.9627	51.1833	39.1448	39.2587	45.0206
9737	83430	Il23a	9.84082	2.7539	0	0	5.74328	0	0	0	46.779	32.2189	6.39528	20.2185	10.1506	7.69429	8.20528	15.1922	2.07507	2.54084	1.57338	0.284803	2.76655	3.63405	1.32187	2.80022	19.4138	18.5403	19.1951	16.9636	16.8321	12.2934	13.5896	15.8896
8086	75974	Dock11	6.1342	2.7539	0	0	5.74328	0	0	0	17.9919	9.66566	3.19764	9.33161	7.61296	3.84714	12.3079	9.11534	1.72923	2.54084	2.20274	3.13284	1.72909	3.96442	1.32187	1.75014	9.70691	12.2555	12.6825	9.52344	13.397	11.9699	12.0796	8.60687
6448	94091	Trim11	367.314	247.851	452.801	276.734	488.179	471.455	477.292	503.532	197.911	248.085	243.021	197.519	271.529	457.81	426.674	446.652	289.127	286.162	276.286	276.259	477.23	489.275	467.943	472.887	237.976	283.761	265.989	278.858	455.497	474.913	444.681	502.84
8350	226976	Kansl3	274.492	217.558	281.049	211.394	390.543	261.919	365.334	381.99	151.132	138.541	124.708	149.306	157.335	203.899	172.311	170.153	336.853	291.243	346.459	292.208	471.005	455.908	481.162	460.986	220.441	193.259	244.737	230.944	282.367	259.132	314.447	250.923
4515	66701	Spryd4	213.809	154.218	179.559	136.445	241.218	246.952	238.646	217.04	143.935	161.094	156.684	166.414	233.464	357.784	258.466	276.499	166.006	159.12	152.304	149.237	210.604	210.114	205.551	207.916	199.461	187.603	197.435	189.874	293.703	331.275	295.573	303.889
4992	18242	Oat	1098.98	1192.44	1428.67	1233.77	1895.28	1945.69	2041.75	1931.65	1054.33	1204.99	1119.17	1241.1	1416.01	1654.27	1526.18	1662.03	633.243	623.458	639.424	652.199	873.192	919.745	959.019	934.223	558.304	562.494	528.893	546.11	733.741	774.808	770.075	812.025
4211	232855	Zfp772	81.0733	30.2929	27.3242	28.8264	57.4328	14.9668	53.0324	34.7264	53.9757	43.4955	95.9292	59.1002	45.6778	53.86	49.2317	42.5383	103.062	79.4011	86.2215	83.4473	89.2212	89.5297	96.8272	98.7077	126.816	130.411	139.85	140.471	144.962	143.639	135.896	134.4
3326	20932	Surf4	3550.17	2305.01	2802.68	2440.64	3618.27	4138.32	3812.44	3871.99	3094.61	3197.72	3283.98	3098.1	4588.08	5028.22	4914.96	4949.63	2406.04	2431.26	2416.09	2472.66	3442.97	3595.06	3495.36	3520.22	2992.23	2880.98	3150.73	3000.78	4720.2	4777.6	4784.66	4823.82
968	67500	Ccar1	1395.88	919.803	640.167	1101.17	1252.04	1227.28	1455.44	1601.75	1227.05	1206.6	1279.06	1182	1421.09	1258.02	1435.92	1215.38	1366.09	1458.44	1442.48	1514.01	1646.44	1672.32	1768.34	1758.89	1403.43	1478.2	1483.85	1485.66	1584.96	1571.29	1714.55	1500.58
77	67248	Rpl39	4270.65	4293.33	3317.94	4423.89	2205.42	2155.22	1982.82	1996.77	3940.23	4558.97	3754.03	4326.76	3509.58	3223.91	3265.7	3041.48	4561.7	4916.2	4883.47	4913.14	4941.75	5046.37	4943.47	5162.2	5009.7	4770.83	4899.54	4756.96	5638.4	6020.85	5834.07	6095.32
6774	100502766	Kifc1	256.575	250.605	343.504	263.281	344.597	546.289	468.453	377.649	233.895	260.973	201.451	203.74	309.594	257.759	373.34	382.844	180.185	159.755	144.751	146.958	286.684	251.74	266.027	247.469	147.796	159.007	152.189	149.994	220.191	203.812	203.466	215.834
365	17149	Magoh	753.502	845.448	507.449	776.392	1223.32	972.843	1051.81	1211.08	806.038	839.302	633.133	870.951	1063.28	869.454	894.375	887.226	584.824	614.247	610.159	608.909	635.269	647.191	655.649	644.75	570.829	537.041	568.654	553.253	677.062	674.519	656.074	668.026
9874	104009	Qsox1	170.132	137.695	191.269	115.306	206.758	261.919	188.56	234.403	215.903	223.921	246.218	200.63	345.121	384.714	381.545	385.883	50.4934	52.0871	52.2364	51.2646	69.1637	87.2172	78.6514	79.1062	97.6953	99.6149	104.202	101.484	154.237	152.05	172.134	152.606
4720	19157	Cyth1	110.669	66.0936	58.5519	48.044	86.1492	74.8341	91.3336	86.8159	111.55	124.043	105.522	104.203	116.732	119.261	127.182	167.115	84.3862	78.7659	84.6481	85.1562	104.437	109.021	102.445	95.5575	128.069	133.867	119.969	127.674	173.817	184.401	167.227	163.862
7525	17101	Lyst	49.1852	33.0468	15.6138	23.0611	34.4597	44.9004	26.5162	47.7488	43.1806	40.2736	35.1741	51.3239	48.2154	57.7071	36.9237	66.8458	50.8392	46.3703	42.1667	34.4612	56.7142	50.5463	57.171	56.0044	51.6658	58.4491	50.7298	58.3311	87.5955	69.2312	68.7028	80.7722
383	19164	Psen1	397.485	358.007	343.504	351.682	631.761	598.673	462.56	533.918	431.806	391.459	361.333	423.033	459.315	557.836	451.29	492.228	325.786	335.708	312.474	349.738	355.847	339.949	364.837	309.074	328.156	337.497	300.266	363.379	364.123	378.507	354.084	354.206
3030	109151	Chd9	215.878	145.957	121.007	161.428	241.218	142.185	229.807	260.448	122.345	115.988	86.3363	119.756	142.109	80.79	106.669	112.423	286.706	307.441	287.3	328.948	406.683	365.387	368.142	375.929	226.703	215.57	225.885	217.551	230.153	219.017	237.44	204.91
8154	212391	Lcor	531.335	358.007	273.242	361.291	493.922	411.587	533.27	594.689	417.412	365.684	393.31	326.606	558.284	488.587	434.88	428.421	521.535	480.536	511.979	461.381	819.936	676.594	723.395	683.953	621.555	572.236	514.496	563.074	756.413	673.225	761.015	690.867
106	56449	Ybx3	6655.18	7909.2	10976.5	7083.61	5341.25	4737	4257.32	5109.12	6642.61	6408.33	7006.03	5788.71	5608.22	5889.98	5809.34	5894.59	7216.41	7060.03	7122.4	6808.51	8253.31	8504	7616.96	7749.6	6029.87	5857.17	5844.55	5617.05	7094.55	7016.3	7115.65	6942.44
1683	72477	Tmem87b	341.119	190.019	101.49	151.819	218.245	231.986	256.323	217.04	269.879	286.748	243.021	272.172	367.96	261.606	246.158	285.614	384.58	347.777	330.411	342.333	407.72	399.745	408.128	419.333	488.477	435.226	451.77	460.399	500.497	531.528	549.622	517.074
9720	18104	Nqo1	71.5058	44.0624	54.6484	30.7482	51.6895	52.3838	67.7636	60.7711	140.337	122.432	83.1387	122.866	149.722	157.733	184.619	106.346	18.6756	17.4683	22.9714	22.2147	30.7779	29.4028	31.3945	26.9521	64.504	70.3903	65.4689	59.2239	91.7177	75.7015	83.4248	77.1308
1470	72020	Zfp654	194.89	145.957	66.3588	142.21	166.555	172.118	232.753	169.291	79.1644	135.319	159.882	129.087	111.657	150.039	201.029	118.499	247.971	197.232	227.511	232.115	261.093	231.258	240.25	219.467	252.066	279.99	228.627	275.882	246.641	240.368	254.427	226.758
3420	142980	Tlr3	30.3728	24.7851	7.80691	17.2959	5.74328	14.9668	35.3549	34.7264	32.3854	33.8298	31.9764	31.1054	53.2907	61.5543	41.0264	42.5383	27.3218	27.6316	19.51	29.6195	23.1698	21.8043	24.7851	21.7017	29.747	28.5961	26.0504	30.0584	48.7787	43.0269	39.2587	32.1103
244	277463	Gpr107	610.77	371.777	444.994	445.849	608.788	748.341	603.98	681.505	748.464	786.141	764.236	737.198	852.652	823.289	775.399	823.419	404.293	421.461	427.331	422.363	438.498	465.819	434.235	464.136	628.757	604.917	596.761	610.989	688.741	696.518	697.975	715.033
279	21423	Tcf3	391.814	289.16	675.298	330.543	212.501	194.569	176.775	225.721	323.854	328.633	332.555	278.393	332.433	334.701	320.006	376.767	538.827	510.391	522.049	476.191	540.86	490.927	495.372	465.186	392.034	401.288	434.288	404.449	460.993	426.71	428.071	426.702
10041	77371	Sec24a	490.219	564.55	530.87	559.233	694.937	957.876	866.196	885.522	557.749	509.058	645.924	660.989	801.899	815.594	931.299	850.765	215.116	192.151	207.057	227.273	374.176	314.51	298.743	301.724	222.32	226.255	223.828	246.419	322.901	313.158	347.666	331.034
4886	211347	Pank3	736.032	236.835	89.7795	228.69	333.11	284.369	282.839	321.219	280.674	315.745	361.333	342.159	469.466	388.561	480.009	391.96	850.779	875.318	880.152	932.161	1239.76	1118.3	1213.81	1214.59	1076.84	1045.17	1066.01	1144	1309.47	1231.6	1432.19	1380.08
1806	56716	Mlst8	131.439	129.433	140.524	182.567	223.988	209.535	253.377	247.425	147.534	135.319	99.1269	115.09	114.194	138.497	172.311	151.922	115.858	117.196	106.046	101.39	128.299	116.29	132.848	130.91	85.1703	73.847	82.2646	77.6756	88.9696	92.8475	77.7625	86.3998
716	242620	Dmrta2	79.9379	104.648	222.497	105.697	86.1492	97.2843	88.3873	95.4975	118.747	109.544	83.1387	97.9819	65.979	123.109	135.387	124.576	49.11	49.2287	56.6419	42.4357	67.4346	61.7788	66.7546	68.6054	37.5751	47.1364	44.2172	46.1292	54.6184	50.1441	47.186	30.4551
564	56298	Atl2	309.656	338.73	175.656	345.917	419.26	449.004	500.862	447.102	446.199	364.073	297.381	421.478	380.648	319.313	307.698	276.499	260.421	249.637	257.091	282.24	262.476	268.259	287.838	264.271	269.602	275.905	272.159	292.251	233.932	203.165	203.843	226.427
1183	241322	Zbtb6	313.657	140.449	39.0346	121.071	178.042	149.668	179.721	147.587	244.69	207.812	207.847	242.622	258.841	203.899	246.158	206.614	337.545	343.013	345.83	367.111	381.438	349.529	374.751	370.679	494.113	492.418	457.939	499.683	499.466	523.763	541.318	570.702
1572	17252	Rdh11	1094.43	660.936	581.615	582.294	918.925	980.326	972.261	863.818	1777.6	1407.96	1458.12	1342.2	1717.99	1585.02	1501.57	1315.65	655.722	567.559	634.704	620.586	739.706	718.55	796.429	700.405	1516.78	1260.74	1360.11	1261.86	1549.93	1363.6	1326.49	1187.75
2768	55963	Slc1a4	222.701	371.777	448.898	330.543	539.869	628.606	497.915	664.142	107.951	133.708	134.301	105.758	142.109	176.969	139.49	185.345	183.298	195.644	188.177	185.976	208.183	250.089	243.225	253.77	62.6252	58.4491	60.3273	59.5215	95.4963	95.4356	74.3651	81.7653
1672	18107	Nmt1	1527.82	1533.92	1487.22	1504.74	2228.39	2439.59	2277.45	2344.03	1388.98	1395.08	1343.01	1362.42	1898.17	2123.62	2010.29	1990.18	1138.18	1119.24	1104.83	1120.42	1544.08	1598.65	1544.94	1514.57	973.822	962.839	973.121	950.261	1388.13	1432.5	1343.1	1326.78
6983	67739	Slc48a1	783.497	333.222	597.229	378.587	666.221	688.473	609.873	664.142	510.97	405.958	479.646	264.396	725.769	665.556	783.604	799.111	852.854	836.888	794.874	802.575	1195.49	1229.96	1056.84	1133.74	801.916	710.817	752.035	737.174	1269.62	1209.93	1163.04	1167.89
6096	74335	Xrcc3	32.2345	16.5234	39.0346	9.60881	57.4328	22.4502	8.83873	34.7264	7.19677	8.05472	15.9882	24.8843	25.3765	38.4714	49.2317	36.4614	32.1636	30.8076	34.2998	33.322	31.4695	41.6264	36.021	37.4529	40.7064	32.6812	44.56	35.1177	40.1909	43.0269	47.186	44.3585
8428	77574	Tcaf1	164.024	82.617	62.4553	107.619	97.6358	217.019	109.011	156.269	251.887	225.532	274.997	216.182	355.272	369.326	324.108	346.383	61.5604	56.216	61.6767	53.2582	89.567	77.3061	83.9389	85.0566	142.472	133.867	129.224	138.388	176.222	209.958	186.479	203.255
6525	54650	Sfmbt1	80.0357	46.8163	50.7449	69.1834	51.6895	59.8673	117.85	91.1567	35.9838	46.7174	44.767	49.7686	98.9685	69.2486	102.566	78.9996	67.7857	72.0962	69.5436	71.4856	128.299	113.977	132.848	120.059	57.3021	53.7355	58.6135	63.3904	121.603	104.817	119.664	111.558
10109	192652	Wdr81	112.984	96.3865	160.042	84.5575	218.245	179.602	138.473	143.246	158.329	149.818	153.487	141.529	192.862	223.134	180.516	209.653	41.1556	41.9238	45.6282	37.594	69.1637	56.4929	70.0593	57.4045	59.1808	74.4755	57.5852	62.7952	92.4047	106.758	100.034	99.9721
3481	13209	Ddx6	1571.28	1969.04	1108.58	1964.04	2435.15	2506.94	2772.42	2634.86	1615.67	1639.94	1506.09	1581.71	2014.9	1846.63	1924.14	2102.6	1151.66	1045.87	1131.26	1086.24	1678.26	1245.82	1434.56	1333.25	1050.54	1058.05	978.263	1097.58	1184.43	1097.35	1278.17	1235.75
2642	237073	Rbm41	129.292	55.078	15.6138	80.714	68.9194	44.9004	97.2261	104.179	97.1563	93.4347	89.534	93.3161	81.2049	111.567	53.3343	75.9612	141.797	156.261	159.227	146.104	156.656	156.594	159.947	158.212	208.229	208.971	192.293	219.039	188.588	182.783	183.459	227.751
5392	56351	Ptges3	4548.42	2963.2	995.381	3645.58	3819.28	3719.25	4236.7	3785.17	2968.67	2761.16	2602.88	3457.36	4699.74	3827.91	4266.74	3953.02	5319.44	5485.03	5335.03	5470.5	6815.74	6865.38	6605.07	6887.14	4399.42	4318.64	4305.86	4434.06	5694.05	5901.48	5721.21	5740.78
1352	235047	Zfp809	167.917	115.664	39.0346	132.602	166.555	104.768	194.452	143.246	89.9596	95.0457	105.522	115.09	114.194	123.109	131.284	75.9612	241.054	215.018	223.421	222.147	244.148	238.856	226.701	247.119	212.926	191.688	188.866	188.981	213.664	196.694	192.141	215.503
4823	228545	Vps18	247.503	203.789	323.987	213.316	384.8	329.27	380.066	342.923	251.887	343.131	303.776	273.727	355.272	488.587	447.188	519.574	106.52	102.586	94.4031	100.251	140.057	141.067	133.84	126.71	147.482	158.378	160.416	145.828	230.496	240.368	244.235	238.675
8559	216049	Zfp365	278.272	49.5702	78.0691	55.7311	74.6627	82.3175	94.2798	99.8383	50.3774	49.9393	41.5693	45.1028	53.2907	100.026	94.3607	103.307	426.773	404.311	430.478	380.212	603.799	622.413	582.285	551.643	333.166	363.579	368.134	336.892	535.191	536.057	523.576	555.474
4859	66612	Ormdl3	132.054	49.5702	121.007	103.775	114.866	164.635	141.42	134.565	86.3612	96.6566	70.3481	91.7609	111.657	176.969	86.1554	167.115	117.933	137.205	129.647	139.269	136.944	171.791	164.904	185.865	119.301	118.784	134.365	122.317	158.702	183.107	170.624	186.041
144	78287	Rbsn	515.135	374.53	265.435	288.264	206.758	209.535	159.097	138.905	309.461	252.918	306.974	262.84	233.464	288.536	213.337	243.076	764.318	787.024	734.141	734.792	828.581	834.51	819.892	869.818	742.109	753.554	722.9	748.186	720.344	694.254	719.114	742.508
3156	66686	Dcbld1	86.0294	60.5858	70.2622	40.357	97.6358	59.8673	76.6024	91.1567	53.9757	49.9393	79.941	62.2108	93.8932	84.6371	77.9501	66.8458	86.4613	97.8222	102.585	97.1179	108.933	108.361	111.037	96.2575	105.523	94.9013	80.5507	83.0325	109.58	100.935	111.359	106.593
1122	70385	Spdl1	417.711	327.714	300.566	363.213	465.206	449.004	533.27	564.304	377.83	404.347	383.717	533.457	426.326	369.326	422.572	376.767	402.91	404.946	408.765	386.763	483.109	468.792	493.059	469.037	383.266	389.661	383.216	413.079	415.993	382.389	385.415	381.02
4544	231630	Ficd	37.1672	24.7851	23.4207	26.9047	34.4597	37.417	38.3012	39.0672	17.9919	28.997	28.7788	55.9897	40.6025	42.3186	61.5396	60.7689	29.7427	29.8548	24.2301	30.1891	30.0862	31.0546	23.4632	31.5025	31.9389	34.5667	40.4467	40.4746	42.252	54.9968	47.186	68.855
2105	67878	Tmem33	1226.53	1324.63	921.216	1316.41	1791.9	1728.67	1847.3	1949.02	1162.28	1148.6	1141.56	1219.33	1669.78	1958.2	1567.21	1759.26	898.506	925.182	858.439	969.185	1116.65	1207.16	1129.54	1253.1	719.251	714.902	719.129	713.663	984.848	1111.58	1016.57	1179.47
7603	30935	Tor3a	91.2473	66.0936	74.1657	67.2616	45.9463	97.2843	126.689	112.861	100.755	104.711	95.9292	91.7609	111.657	107.72	77.9501	148.884	62.9438	75.9075	52.8657	61.8023	80.5757	96.7978	78.6514	82.2564	82.9784	94.9013	81.579	92.556	99.2749	117.758	108.716	129.434
6840	22284	Usp9x	2533.95	1770.76	854.857	1860.26	2050.35	2140.25	2551.45	2430.85	2119.45	2052.34	1960.15	2144.72	2578.26	2304.44	2498.51	2026.64	2471.06	2354.4	2419.55	2425.1	3504.53	3117.68	3646.72	3220.6	2942.45	2847.67	2827.84	2904.65	3184.7	3031.29	3234.32	3076.63
1533	81898	Sf3b1	2811.18	2530.83	1799.49	2834.6	3411.51	3517.2	4036.36	3672.31	2741.97	2600.06	2586.89	2878.8	3253.27	2723.78	2933.39	2801.45	2426.45	2577.36	2560.21	2651.23	3161.13	3040.38	3343.68	3190.15	2412.01	2340.48	2414.81	2544.25	2524.81	2469.68	2608.06	2559.88
2902	74081	Cep350	177.215	49.5702	42.938	69.1834	74.6627	134.701	82.4948	73.7935	100.755	111.155	111.917	130.643	88.8179	88.4843	69.7448	85.0765	235.521	213.748	219.959	242.937	260.747	242.16	247.521	263.221	325.025	294.131	315.005	319.928	261.069	235.192	255.937	247.613
1679	240263	Fem1c	398.923	338.73	210.787	326.699	292.907	449.004	542.109	494.851	550.553	436.566	402.903	517.905	517.681	407.797	426.674	352.46	372.129	324.592	342.683	348.314	412.907	359.771	404.163	391.681	442.447	376.463	376.018	435.4	387.481	350.685	400.515	373.737
6093	319565	Syne2	641.902	313.945	261.532	282.499	379.057	434.038	489.077	421.057	395.822	375.35	377.322	357.712	385.723	353.937	344.622	370.69	720.741	631.398	712.114	670.427	1002.87	821.625	1031.06	962.575	1062.12	954.041	987.518	1043.71	956.68	938.827	964.104	896.77
3452	97122	H4c14	4705.18	8035.88	9383.91	7537.15	13094.7	12489.8	12530.4	12510.2	6502.28	6857.79	7239.46	7190.01	6526.85	6136.19	6502.68	6022.2	1200.43	1124.32	1053.54	923.047	1447.6	1365.74	1385.98	1492.52	935.934	971.952	1035.51	955.023	990.001	732.428	967.879	719.336
1686	68316	Apoo	283.988	289.16	183.462	284.421	338.854	463.971	362.388	451.443	269.879	317.356	268.602	342.159	454.24	380.867	377.443	370.69	192.29	218.512	206.428	212.463	261.439	243.481	247.19	245.719	206.663	178.804	183.724	200.588	253.168	265.926	258.202	274.096
1985	66877	Crnkl1	561.105	506.718	335.697	472.753	671.964	703.44	751.292	590.348	557.749	621.824	569.18	710.758	804.436	773.276	722.064	802.15	371.438	382.078	404.989	397.87	456.135	472.096	519.166	500.889	457.79	476.392	466.509	499.088	548.245	648.315	599.451	600.164
7098	214459	Fnbp1l	266.094	212.05	144.428	207.55	287.164	321.787	309.356	264.789	262.682	236.809	271.8	225.514	345.121	250.064	295.39	233.96	228.258	208.666	208.001	200.786	327.836	295.349	297.091	276.872	271.48	259.879	270.445	271.716	304.008	325.775	333.699	300.579
2432	225339	Ammecr1l	333.12	223.066	199.076	238.298	327.367	381.654	312.302	364.627	349.043	289.97	326.159	279.948	322.282	330.854	344.622	334.229	306.419	283.621	270.937	295.341	363.11	369.021	334.764	370.329	373.559	379.605	370.533	352.367	394.695	372.361	426.939	439.613
4410	20778	Scarb1	472.377	280.898	339.601	299.795	453.719	508.872	412.474	503.532	392.224	410.791	406.1	337.493	639.489	692.486	607.19	610.728	385.963	388.113	388.626	380.212	545.702	514.713	515.861	511.74	404.246	358.865	442.172	388.973	664.352	608.847	626.252	623.667
3723	110094	Phka2	140.43	167.988	117.104	111.462	229.731	164.635	194.452	204.017	140.337	117.599	118.313	133.753	139.571	92.3314	86.1554	127.615	155.63	132.441	130.906	140.123	173.947	181.702	172.504	168.363	112.412	136.696	111.057	127.078	109.924	113.552	112.491	129.434
5800	79566	Sh3bp5l	193.171	66.0936	62.4553	59.5746	97.6358	82.3175	100.172	82.4751	111.55	96.6566	105.522	82.4293	121.807	119.261	110.771	154.961	226.874	181.67	205.169	194.805	269.738	243.812	243.555	246.069	348.822	273.391	308.835	266.359	395.039	398.241	368.428	363.806
1348	67897	Rnmt	738.907	721.522	456.704	803.296	982.101	905.492	1140.2	1046.13	690.89	687.873	613.947	723.2	900.867	815.594	873.862	741.381	600.733	610.436	674.038	644.225	766.68	754.561	803.699	742.058	619.677	603.346	633.78	600.275	663.321	671.931	684.385	729.929
3281	239273	Abcc4	261.567	239.589	210.787	238.298	333.11	329.27	321.141	425.398	212.305	219.088	195.056	209.961	253.765	292.383	270.774	255.23	232.754	227.405	224.994	224.995	306.741	274.205	322.207	268.121	230.461	214.628	233.083	218.444	293.703	261.396	281.606	287.668
5168	100163	Pafah2	72.7483	79.8631	78.0691	44.2005	91.8925	104.768	111.957	65.1119	53.9757	59.6049	63.9528	48.2133	88.8179	103.873	53.3343	75.9612	53.606	53.9928	50.0336	52.9734	102.708	103.075	87.2436	90.6571	53.2314	43.6797	40.4467	39.2842	101.68	89.2889	74.3651	95.3377
698	216345	Zfc3h1	696.099	360.761	370.828	420.866	465.206	591.189	654.066	607.711	705.283	644.378	649.121	754.305	652.177	688.639	779.501	644.151	631.513	608.213	637.221	663.307	702.358	670.647	784.862	687.804	822.269	877.994	874.404	942.523	849.505	930.74	931.64	975.887
9393	223881	Rnd1	145.479	151.465	171.752	180.646	246.961	209.535	235.7	321.219	89.9596	124.043	118.313	155.527	129.42	157.733	90.258	127.615	116.55	119.737	122.724	133.288	172.909	193.926	186.054	213.867	77.9684	103.7	95.6326	113.091	74.8856	89.6124	86.4447	99.3101
6265	21981	Ppp1r13b	37.0885	27.539	7.80691	36.5135	51.6895	44.9004	38.3012	30.3856	61.1725	54.7721	41.5693	41.9923	58.366	42.3186	53.3343	51.6536	23.8633	22.5499	23.9155	24.4931	30.7779	26.0991	30.7335	24.1519	37.5751	32.0527	40.7895	39.2842	41.5649	39.4683	31.709	38.3999
4197	76055	Oga	1843.89	1319.12	964.154	1270.28	1826.36	1810.98	1864.97	1779.73	1561.7	1372.52	1470.92	1455.73	1865.18	1854.32	1874.91	1625.57	1847.16	1725.23	1731.98	1649.58	2426.61	2360.81	2627.55	2231.42	1970.19	1904.31	1844.78	1818.68	2282.64	2307.28	2309.85	2206.01
4355	235293	Sc5d	368.31	212.05	187.366	278.655	396.287	269.403	377.119	351.605	331.051	331.854	274.997	293.946	479.617	569.377	644.114	464.882	263.188	263.294	278.174	288.221	339.94	362.414	369.794	382.23	326.904	301.359	318.775	305.048	504.962	543.498	555.662	551.833
4698	19167	Psma3	2289.27	1927.73	878.278	2223.48	2659.14	2432.11	2698.76	2461.23	1953.92	2004.01	1899.4	2225.59	3392.84	2696.85	2769.28	2445.95	1912.87	2021.55	2034.7	2054.86	2531.05	2532.6	2531.39	2650.76	1915.71	1832.35	1966.12	1892.49	2602.79	2623.99	2593.72	2601.92
2598	213827	Arcn1	1972.64	1809.31	815.822	1864.11	2371.98	2013.04	2395.3	2361.39	1299.02	1271.03	1208.71	1489.95	1849.95	1596.56	1493.36	1543.53	2345.87	2344.56	2404.13	2411.71	2756.87	2773.11	2900.52	2832.42	1715.3	1658.57	1717.62	1762.13	2038.06	2057.85	2002.57	2047.44
1510	21843	Tial1	422.021	393.808	402.056	449.692	568.585	598.673	601.034	750.958	320.256	385.016	290.985	522.57	454.24	492.434	443.085	549.959	363.137	405.899	354.326	426.92	401.841	398.754	389.292	490.388	278.995	325.241	296.495	363.379	313.97	338.392	324.64	387.64
168	105782	Scrib	801.637	845.448	1327.18	834.044	654.734	770.791	524.432	490.51	881.604	805.472	972.083	777.634	847.576	857.913	964.12	777.842	813.082	760.345	759.945	696.059	948.926	921.066	889.29	911.821	738.038	713.959	770.202	689.855	748.856	704.929	786.307	666.702
6847	15528	Hspe1	3400.84	2844.78	1288.14	3259.31	4037.53	3831.5	3500.14	3650.61	2385.73	2232.77	1956.96	2563.08	4291.17	3885.61	3577.5	3867.94	3296.94	3558.76	3257.85	3442.99	4474.55	5028.53	4056.17	4882.18	2445.2	2346.14	2226.97	2416.28	3897.14	4487.09	3694.85	4741.73
1398	56360	Acot9	978.187	669.198	382.539	732.191	987.845	860.592	1007.62	842.114	982.359	992.341	965.688	884.948	1230.76	1096.44	1148.74	972.303	814.811	818.149	890.536	853.27	978.667	998.042	1041.64	1025.23	1089.68	1061.2	1116.74	1082.1	1128.09	1275.28	1202.3	1192.38
8593	76737	Creld2	357.205	217.558	300.566	201.785	292.907	419.071	268.108	468.806	201.509	235.198	207.847	377.93	418.713	523.211	352.827	747.458	258.346	275.998	240.413	258.317	331.294	385.87	310.971	426.333	262.713	290.36	238.224	335.404	481.947	563.232	446.191	734.233
6112	20524	Slc25a17	423.099	446.132	296.663	424.709	528.382	651.056	583.356	664.142	280.674	381.794	370.926	334.383	319.744	415.491	434.88	315.998	370.054	333.167	374.466	360.846	509.737	527.267	509.252	473.237	336.297	329.955	362.65	331.535	480.23	467.796	456.005	445.24
6391	210853	Zfp947	28.4825	0	3.90346	13.4523	22.9731	0	11.785	4.3408	10.7951	11.2766	0	7.77634	5.07531	19.2357	12.3079	12.1538	39.0805	46.0527	45.6282	43.2901	37.6942	38.6531	42.6304	51.454	51.3527	61.2773	38.3901	55.355	43.9695	42.3799	57.3781	53.2964
8612	12330	Canx	8475.93	6865.47	4871.51	6879.91	9436.21	9212.07	9401.47	9658.27	7149.99	6959.28	6411.27	7199.34	10013.6	9714.04	9924.28	10397.6	7264.13	7650.78	7040.58	7395.2	10519.5	10907.1	10762.4	11257.2	6794.21	6687.4	6641.49	7030.68	9294.06	9814.66	9298.28	10302.1
2125	72307	2510002D24Rik	61.6371	24.7851	15.6138	19.2176	40.203	44.9004	29.4624	13.0224	28.7871	22.5532	12.7906	17.108	17.7636	7.69429	28.7185	30.3845	104.099	118.784	108.249	111.358	90.2586	76.6454	89.5569	90.3071	103.332	98.0437	98.0319	98.5081	100.649	83.7892	86.8222	99.3101
3236	20523	Slc25a14	62.586	33.0468	35.1311	49.9658	80.406	37.417	55.9786	65.1119	75.566	93.4347	73.5458	96.4267	104.044	119.261	53.3343	82.0381	35.2762	40.6534	36.8172	36.4548	31.8153	37.0012	41.3085	41.6533	69.514	67.2479	74.0381	79.4612	69.7329	82.4952	75.1201	66.8688
18	27176	Rpl7a	19665.4	23790.9	24904.1	22423.1	14967	14016.4	12916.3	14085.9	25555.7	25385.3	26383.7	24436.4	23919.9	23036.7	23360.4	22101.7	15433.7	15947.2	15098.8	15111.4	17781.6	19086.4	17472.5	18809.1	17267	17383	17060	16703.8	20738.8	21879	20822.6	21749.6
7942	74104	Abcb6	130.524	74.3553	97.5864	88.401	160.812	164.635	109.011	112.861	129.542	140.152	172.673	163.303	220.776	200.051	237.953	291.691	57.7561	75.9075	64.8235	78.0361	90.2586	90.1905	104.428	101.508	106.463	97.4152	111.743	92.556	140.84	175.343	133.631	161.544
3192	230848	Zbtb40	144.559	90.8787	121.007	84.5575	132.096	224.502	153.205	91.1567	104.353	99.8785	147.092	111.979	78.6673	96.1786	106.669	127.615	162.547	154.356	146.954	158.066	186.742	182.694	167.878	197.065	131.826	142.666	139.164	165.47	197.176	191.195	188.744	198.951
6995	226422	Rab29	21.7301	8.2617	0	9.60881	5.74328	14.9668	11.785	8.68159	3.59838	17.7204	22.3835	12.4422	12.6883	7.69429	12.3079	18.2307	20.7507	20.0091	23.9155	27.0563	26.2822	21.8043	22.1414	25.552	25.9895	37.7091	27.4215	44.3435	41.5649	51.7617	44.5436	46.6757
8721	72556	Zfp566	33.1912	24.7851	23.4207	38.4352	34.4597	59.8673	35.3549	56.4304	14.3935	17.7204	31.9764	35.7712	22.8389	26.93	16.4106	18.2307	26.2842	38.4302	40.2787	27.3411	33.8902	50.2159	45.6046	48.6538	31.9389	39.2803	39.0757	36.0105	29.542	30.0865	26.8016	28.4689
721	67760	Slc38a2	6357.32	7474.09	6464.12	6904.89	10958.2	9586.24	10842.2	10569.8	7934.43	7674.54	8096.43	7552.39	8734.61	7878.95	8303.74	7401.66	4165.01	3784.89	3879.65	3877.88	5310.39	4470.87	4928.93	4645.56	4733.84	4413.22	4512.9	4425.43	4734.28	4335.36	4414.72	4067.74
5047	218914	Wapl	910.53	349.745	179.559	461.223	585.815	538.805	577.464	438.42	377.83	446.231	406.1	443.252	672.478	596.307	656.422	574.266	1152.36	1142.11	1203.01	1187.34	1605.98	1566.94	1656.64	1582.82	1088.11	1153.27	1112.97	1153.53	1334.89	1350.98	1330.27	1301.29
765	66827	Ttc1	356.342	245.097	202.98	286.342	367.57	344.237	430.152	351.605	259.084	288.359	306.974	283.059	436.476	353.937	365.135	407.152	348.958	339.519	353.382	357.998	396.654	386.531	408.128	392.731	340.681	334.354	340.027	342.546	425.611	450.003	437.886	463.447
3891	12304	Pdia4	2267.66	2302.26	2189.84	1869.87	2940.56	3165.48	3232.03	3433.57	2277.78	2550.12	2273.52	2853.92	3055.34	3550.91	3208.26	4490.82	1340.15	1431.13	1237.94	1414.62	1669.27	1763.83	1645.07	1902.75	1439.13	1477.88	1394.04	1660.35	1902.03	2202.14	1860.26	2562.53
2387	30957	Mapk8ip3	103.129	30.2929	35.1311	36.5135	86.1492	29.9336	47.1399	39.0672	53.9757	41.8845	35.1741	37.3265	58.366	50.0129	65.6422	15.1922	171.193	158.802	172.758	160.059	149.739	167.827	152.676	143.511	169.714	153.665	163.501	148.209	162.825	155.285	163.075	142.344
3210	20619	Snap23	402.667	242.343	132.718	219.081	292.907	276.886	338.818	308.197	313.059	315.745	265.404	318.83	451.702	450.116	402.059	446.652	361.062	365.245	359.046	391.32	471.697	462.846	466.291	482.688	449.962	481.734	462.395	499.386	568.512	631.169	601.338	653.46
7363	16874	Lhx6	10.0116	8.2617	3.90346	7.68705	17.2298	7.48341	8.83873	8.68159	14.3935	9.66566	12.7906	7.77634	5.07531	3.84714	4.10264	9.11534	11.4129	11.4338	11.9577	9.1137	9.3371	9.91104	13.5492	14.3511	7.2019	12.5697	8.56923	9.22584	10.3054	12.2934	17.3644	12.9103
6421	71481	Alpk1	15.3137	11.0156	0	7.68705	0	14.9668	8.83873	17.3632	14.3935	12.8876	6.39528	15.5527	2.53765	15.3886	4.10264	9.11534	19.0215	14.9274	14.4751	18.5122	16.5993	15.1969	16.8539	16.4513	25.6763	32.0527	22.28	24.7014	24.7329	21.3517	18.8744	32.7723
3585	227731	Slc25a25	141.471	60.5858	105.393	76.8705	160.812	142.185	91.3336	108.52	133.14	133.708	156.684	133.753	144.646	157.733	147.695	179.268	112.746	126.724	112.654	117.054	139.711	141.398	122.604	149.812	180.674	190.117	161.787	169.636	187.557	170.814	174.022	195.972
5738	245857	Ssh3	323.377	228.574	335.697	161.428	201.015	359.204	341.764	451.443	212.305	291.581	243.021	300.167	322.282	411.644	369.237	407.152	255.58	242.65	236.322	241.798	326.799	333.672	340.382	313.975	357.277	361.065	351.681	343.439	423.55	439.327	400.892	419.751
438	241447	Cers6	612.371	470.917	394.249	549.624	769.6	838.142	668.798	698.868	489.38	436.566	441.275	533.457	525.294	511.67	557.959	616.805	729.042	679.039	664.912	706.312	772.213	713.925	738.927	759.209	577.091	541.44	562.827	605.929	625.192	553.85	605.49	645.516
1410	17434	Mocs2	184.669	143.203	89.7795	122.993	178.042	187.085	179.721	190.995	140.337	138.541	105.522	130.643	157.335	161.58	192.824	179.268	205.778	212.477	212.092	206.767	218.212	235.552	220.092	233.118	175.977	187.917	208.746	188.683	216.069	245.221	226.115	234.041
5004	68149	Otub2	28.0031	8.2617	7.80691	5.76528	11.4866	37.417	2.94624	4.3408	25.1887	30.6079	28.7788	38.8817	17.7636	30.7771	4.10264	18.2307	41.8473	36.8421	37.1319	36.7396	28.0113	34.3583	30.4031	33.6026	43.8377	50.9073	43.1889	52.6766	30.9161	27.8219	34.3514	33.1034
1689	238871	Pde4d	92.8165	123.926	85.876	98.0098	137.839	104.768	164.99	190.995	143.935	125.654	118.313	101.092	83.7426	142.344	135.387	103.307	58.7937	66.0618	67.9702	58.9543	56.7142	67.7254	71.7116	58.1045	64.1908	80.4461	82.2646	67.5569	57.71	60.4965	54.7357	43.6964
691	71777	Ing3	161.121	151.465	152.235	142.21	183.785	239.469	232.753	225.721	129.542	183.648	159.882	152.416	147.184	153.886	114.874	115.461	177.073	164.519	166.464	168.319	174.984	165.845	167.217	179.914	144.038	138.895	142.935	146.423	146.68	145.903	139.67	141.351
3178	20866	Stim1	283.031	220.312	206.883	219.081	338.854	291.853	368.281	277.811	298.666	283.526	313.369	281.504	365.422	400.103	455.393	364.614	223.762	195.009	179.681	201.071	252.448	254.714	256.113	253.07	257.077	246.995	255.02	255.347	321.527	323.834	303.123	309.516
4159	77264	Zfp142	134.256	79.8631	132.718	86.4793	172.298	157.152	111.957	156.269	100.755	93.4347	83.1387	76.2082	78.6673	73.0957	106.669	136.73	128.654	106.398	113.284	98.5419	234.811	199.212	192.002	202.666	111.786	106.842	123.74	116.365	197.863	194.106	198.559	191.668
2220	21366	Slc6a6	2288.77	1949.76	1924.4	1808.38	2814.21	2911.05	2843.13	2799.81	2911.09	2640.34	2865.09	2609.74	3732.89	3693.26	3803.15	3497.25	1352.95	1235.8	1241.72	1271.36	1713.53	1635.65	1833.77	1642.33	1749.12	1740.59	1907.17	1746.36	2328.67	2165.58	2414.03	2169.59
7535	12847	Copa	2024.29	1883.67	2041.51	1919.84	2682.11	2963.43	3067.04	2917.02	2133.84	2110.34	2072.07	2234.92	2707.68	2485.25	2646.2	2734.6	1285.16	1330.13	1300.87	1376.45	1914.11	2074.71	2114.67	2095.61	1362.41	1354.39	1332.34	1455.6	1646.8	1839.8	1764.76	1905.76
5059	11668	Aldh1a1	19.9488	27.539	11.7104	36.5135	34.4597	14.9668	47.1399	52.0896	14.3935	3.22189	9.59292	7.77634	20.3012	15.3886	12.3079	12.1538	13.8338	16.833	17.9366	18.2274	33.8902	31.0546	36.021	32.5525	6.88877	8.17031	9.59753	9.22584	16.1451	18.4401	15.477	14.5655
549	321006	Dcaf1	521.996	479.179	413.766	564.998	683.451	950.393	733.615	698.868	507.372	483.283	457.263	499.241	532.907	569.377	467.701	473.998	505.28	497.686	489.637	510.367	572.676	555.349	601.122	555.843	387.65	412.601	415.436	451.471	431.107	431.239	432.224	416.771
374	18146	Npdc1	239.257	275.39	386.442	157.584	114.866	164.635	123.742	147.587	446.199	389.848	386.915	370.154	357.809	415.491	340.519	422.344	130.038	130.535	128.074	120.187	145.59	146.023	115.333	124.96	212.613	225.312	256.391	205.052	244.924	247.809	252.539	232.055
451	66990	Tmem134	380.018	143.203	171.752	126.836	34.4597	82.3175	64.8174	43.408	223.1	212.645	166.277	158.637	137.033	111.567	118.976	148.884	622.867	585.028	608.585	569.606	463.397	495.552	458.029	459.236	770.603	754.496	800.023	704.14	675.001	612.082	651.544	606.454
5470	216177	AU041133	24.1599	8.2617	3.90346	7.68705	17.2298	0	8.83873	13.0224	7.19677	6.44378	12.7906	23.329	2.53765	0	4.10264	6.07689	49.8017	52.7224	49.4043	46.9925	32.8528	43.6086	49.5702	46.9037	32.252	35.8237	32.5631	31.5464	25.0764	39.7918	27.1791	31.4482
4492	22288	Utrn	793.027	399.316	351.311	376.665	482.436	523.838	556.84	677.164	514.569	452.675	572.378	474.357	502.455	565.53	492.317	525.651	944.157	846.416	900.291	811.974	1198.26	1134.15	1268.34	1120.09	1110.35	1044.23	1115.37	1095.79	1161.76	1122.9	1117.74	1124.52
1265	108937	Rnf169	361.617	258.867	277.145	147.976	350.34	329.27	303.463	316.878	151.132	122.432	166.277	183.522	314.669	296.23	246.158	267.383	340.312	320.781	320.971	339.77	644.26	647.521	634.499	645.45	285.884	274.334	273.187	283.918	612.825	605.612	611.153	637.902
919	338467	Morc3	453.093	297.421	156.138	276.734	327.367	306.82	427.205	408.035	345.445	328.633	342.148	446.362	373.035	365.479	344.622	309.922	513.926	544.692	578.062	567.328	587.546	563.277	617.976	638.45	542.961	541.44	528.207	588.37	535.878	547.703	551.132	543.557
7759	20502	Slc16a2	17.3104	16.5234	15.6138	15.3741	22.9731	44.9004	17.6775	17.3632	39.5822	38.6627	25.5811	34.2159	27.9142	26.93	45.129	18.2307	5.53352	5.08167	4.0908	7.68969	6.57055	4.62515	7.2703	8.40066	14.0907	11.9412	8.56923	4.76172	9.61833	12.2934	9.81468	9.59997
935	27061	Bcap31	1263.09	1396.23	850.954	1418.26	1814.88	1788.53	1885.6	1944.68	1572.49	1551.34	1566.84	1527.27	2075.8	2300.59	1915.93	2099.57	745.296	749.547	735.4	747.324	813.019	887.699	882.35	900.27	806.926	766.438	807.564	740.745	911.68	1034.26	955.799	962.646
3986	320191	Hook3	378.201	247.851	105.393	228.69	275.678	217.019	356.496	321.219	219.501	275.471	214.242	259.73	324.82	300.077	381.545	306.883	395.647	395.418	371.948	399.294	512.503	487.623	532.054	493.889	462.8	477.02	450.741	493.731	553.741	530.234	577.179	555.805
10033	228608	Smox	152.476	85.3709	85.876	78.7922	97.6358	89.8009	126.689	160.609	169.124	130.486	102.325	93.3161	177.636	188.51	155.9	136.73	119.317	99.0926	114.542	107.371	148.702	183.354	167.217	163.813	197.269	185.089	187.495	169.041	275.84	253.956	248.764	227.089
5100	170822	Usp33	340.142	297.421	167.849	288.264	321.624	486.421	356.496	438.42	320.256	272.25	274.997	314.164	319.744	296.23	344.622	349.421	304.69	320.145	314.677	325.815	412.907	416.264	442.497	429.834	295.278	301.987	319.804	333.916	347.634	358.126	374.09	398.564
5322	270163	Myo9a	211.416	93.6326	62.4553	99.9316	114.866	172.118	123.742	138.905	82.7628	82.1581	79.941	69.9871	124.345	80.79	86.1554	85.0765	294.66	294.419	276.916	302.176	412.907	353.494	365.828	364.028	309.055	294.131	277.643	277.966	322.558	303.453	293.308	314.482
8921	74122	Tmem43	3889.23	2965.95	3072.02	2917.23	4290.23	4460.11	4905.5	4175.85	4944.18	4802.22	5583.08	4168.12	6889.73	7617.34	8217.58	7037.04	1725.08	1500.36	1829.22	1644.74	2370.24	2281.52	2792.13	2326.63	3058.3	2620.78	3249.11	2498.12	4183.97	4133.17	4487.2	3819.47
4040	17463	Psmd7	2188.66	2291.25	2299.14	2336.86	3394.28	4048.52	3341.04	3212.19	1939.53	1833.25	1819.46	1819.66	2900.54	2689.15	2785.69	2582.68	1704.33	1674.73	1677.86	1780.02	2362.29	2448.36	2331.12	2424.64	1260.02	1246.91	1164.39	1206.8	1877.29	1888.98	1755.32	1752.16
3082	78757	Rictor	385.933	256.113	249.821	288.264	407.773	389.137	459.614	325.56	320.256	280.304	233.428	304.833	286.755	257.759	324.108	303.845	426.427	410.663	422.297	408.693	541.898	499.516	576.337	498.439	459.043	422.028	421.263	412.782	470.611	423.799	454.873	427.695
2205	12396	Cbfa2t2	374.758	294.667	288.856	257.516	384.8	396.621	380.066	494.851	313.059	272.25	223.835	307.943	380.648	373.173	369.237	388.921	360.371	327.45	354.641	364.263	446.106	440.711	430.27	431.934	371.368	356.037	381.845	392.247	458.245	450.974	481.674	442.923
3184	99100	Cep152	150.5	57.8319	50.7449	76.8705	91.8925	89.8009	97.2261	95.4975	64.7709	64.4378	51.1623	63.766	101.506	134.65	41.0264	115.461	186.756	185.799	186.603	207.622	194.696	210.775	223.066	213.167	228.269	213.056	238.224	242.55	239.084	222.575	230.645	245.958
5448	19124	Procr	2255.15	1115.33	1432.57	1020.46	1826.36	1878.34	1679.36	1692.91	3576.79	3304.05	3399.09	2782.38	5605.68	5274.43	5444.2	4791.63	637.393	582.804	565.16	534.576	1009.44	983.506	965.298	912.871	2186.87	1763.53	1837.58	1542.5	3299.43	2887.33	2781.33	2596.3
2318	14325	Ftl1	9605.13	1074.02	1744.85	868.636	1820.62	1885.82	1573.29	1983.74	1270.23	1275.87	1285.45	1082.47	1976.83	2015.9	2010.29	2060.07	13087.8	13062.1	13294.2	11834.1	15245.8	16005.3	14229.3	15197.5	17333.7	17359.4	17925.8	15380.1	23762.8	24201.8	23208.7	22702.6
2313	106205	Zc3h7a	435.055	253.359	167.849	245.985	292.907	396.621	394.797	277.811	334.65	306.079	326.159	342.159	393.336	380.867	340.519	312.96	451.674	415.109	457.855	409.262	514.232	517.356	572.041	501.939	623.121	586.062	639.607	587.478	584.314	613.699	607	639.888
5795	216274	Cep290	137.03	74.3553	19.5173	78.7922	103.379	119.735	79.5486	86.8159	82.7628	103.1	70.3481	115.09	126.883	88.4843	69.7448	85.0765	149.751	149.592	168.982	148.098	200.921	177.077	185.723	195.315	222.32	210.543	177.212	203.861	197.863	184.401	179.307	193.324
8155	319186	H2bc14	1150.06	1313.61	1557.48	1324.09	2142.24	1915.75	2047.64	2170.4	1068.72	1039.06	1199.12	1256.66	1177.47	1154.14	951.812	1005.73	899.543	893.104	962.597	780.93	1288.87	1183.05	1306.01	1333.6	697.958	733.128	736.268	691.938	751.604	722.399	676.458	670.343
3323	52430	Echdc2	78.2931	38.5546	89.7795	46.1223	97.6358	59.8673	76.6024	78.1343	50.3774	57.994	86.3363	66.8766	55.8284	107.72	90.258	127.615	65.3647	73.0491	79.6133	78.3209	75.7343	83.2527	76.0077	79.1062	91.1197	71.9616	85.0067	76.7828	92.7482	84.1127	100.789	84.4136
9853	67103	Ptgr1	217.088	256.113	230.304	224.846	258.448	329.27	415.42	368.968	287.871	278.693	233.428	273.727	350.196	407.797	283.082	340.306	110.325	95.2814	101.955	106.516	138.673	165.514	164.573	155.412	123.998	132.925	127.853	113.984	147.71	195.4	166.472	144.662
7179	67454	Ikbip	29.0603	13.7695	7.80691	19.2176	22.9731	7.48341	20.6237	30.3856	17.9919	20.9423	25.5811	35.7712	45.6778	19.2357	32.8211	36.4614	17.6381	26.3612	33.9851	24.2083	27.6655	30.0635	29.7421	30.8024	35.3832	25.7679	37.3618	36.0105	40.8779	48.5266	43.7886	55.9447
3924	226407	Rab3gap1	657.477	570.057	519.16	561.154	844.263	875.559	789.594	833.433	579.34	581.551	521.216	580.115	692.78	654.014	750.783	765.689	575.832	556.126	571.768	586.41	770.83	755.552	837.407	742.408	547.658	537.669	522.38	545.812	698.703	650.256	662.491	701.791
4986	80708	Pacsin3	321.255	236.835	257.628	146.054	275.678	321.787	344.711	277.811	446.199	571.885	594.761	415.257	525.294	650.167	746.68	656.304	113.783	113.702	127.13	96.2635	124.495	142.058	158.625	145.611	303.419	304.187	308.835	282.132	313.97	328.687	328.037	300.91
9731	72284	LTO1	103.632	68.8475	66.3588	76.8705	114.866	97.2843	91.3336	130.224	86.3612	75.7144	105.522	96.4267	106.581	115.414	118.976	97.2303	86.4613	83.8476	76.1518	75.4729	107.204	120.584	128.222	131.26	99.8872	97.4152	106.601	97.3177	140.84	143.962	130.988	138.372
4323	230259	E130308A19Rik	69.9634	33.0468	42.938	34.5917	57.4328	59.8673	47.1399	52.0896	89.9596	75.7144	54.3599	66.8766	60.9037	73.0957	69.7448	82.0381	69.5149	62.8857	66.0822	65.2199	74.0052	72.0202	64.4413	73.1557	97.3822	100.243	82.2646	91.3655	101.336	77.966	89.0871	82.0963
2798	66244	Nemf	556.71	374.53	163.945	368.978	447.976	389.137	515.593	503.532	410.216	434.955	434.879	474.357	535.445	484.74	512.83	492.228	605.921	590.427	582.467	608.055	712.386	698.398	792.793	782.661	622.182	632.57	632.752	693.426	700.077	697.812	717.227	645.516
844	67515	Ttc33	101.32	79.8631	117.104	99.9316	132.096	104.768	162.043	156.269	39.5822	103.1	89.534	88.6503	83.7426	76.9429	82.0528	124.576	106.174	115.608	106.99	113.352	96.1376	105.057	106.411	108.158	86.7359	102.129	85.0067	94.3416	89.3131	98.3472	95.8819	91.0342
717	17992	Ndufa4	3666.06	4549.44	2759.74	4840.92	6076.39	5844.54	6151.76	6198.66	4426.01	4916.6	4297.63	4684.47	5704.65	5751.48	5665.74	5523.9	2133.86	2220.69	2226.65	2173.9	2282.4	2459.26	2387.96	2470.14	2055.67	1939.19	2030.56	1899.33	2369.2	2499.77	2492.17	2615.17
3955	102866	Pls3	3445.38	3293.67	1900.98	3672.49	4003.07	4654.68	4831.84	4236.62	4318.06	4294.78	4051.41	4745.13	4534.79	4489.62	4558.03	4208.25	2289.15	2357.26	2384.31	2545	2811.16	3026.83	3280.56	3117.34	2837.24	2954.82	2804.54	2968.04	2729.2	3011.88	2937.61	2958.45
1670	230709	Zmpste24	509.659	490.194	304.47	470.832	660.478	583.706	648.174	672.823	647.709	587.995	540.401	598.779	806.974	807.9	812.322	601.612	349.649	361.116	347.403	375.086	383.859	409.326	445.141	457.136	418.336	382.119	369.162	385.7	459.275	439.327	469.972	512.44
3029	209760	Tmc7	220.9	110.156	66.3588	98.0098	166.555	164.635	100.172	156.269	367.035	231.976	271.8	217.738	266.454	257.759	254.364	206.614	149.405	143.875	154.192	140.408	181.901	162.541	159.616	145.611	355.711	302.301	388.7	294.334	362.061	321.246	346.534	303.558
6652	320632	Snrnp200	1880.23	1812.07	1783.88	1829.52	2354.75	2626.68	3019.9	2669.59	2241.79	2234.38	2148.81	2318.91	2608.71	2662.22	2551.84	2880.45	1054.83	1089.07	1033.4	1121.84	1607.36	1592.37	1757.1	1717.23	1336.42	1326.1	1302.18	1417.8	1499.77	1551.23	1550.34	1586.64
6329	20019	Polr1a	1182.71	1459.57	1674.58	1243.38	2044.61	1953.17	2215.58	2300.62	816.833	900.518	901.735	1017.15	1004.91	1131.06	1037.97	1172.84	1001.91	1029.04	998.155	1055.77	1364.95	1406.38	1492.06	1494.27	683.554	708.931	657.088	734.793	765.688	772.867	818.771	805.405
4450	59002	Wrap73	110.45	93.6326	132.718	126.836	172.298	164.635	182.667	173.632	86.3612	72.4925	105.522	110.424	126.883	226.981	164.106	191.422	53.606	68.6026	58.5299	55.8214	104.783	128.183	94.8444	105.708	46.9689	41.1658	50.387	53.5694	105.115	111.288	96.2594	118.51
2160	235682	Zfp445	599.326	360.761	226.4	426.631	522.639	396.621	598.088	520.896	287.871	401.125	377.322	443.252	512.606	400.103	451.29	391.96	725.929	698.095	728.792	726.818	849.33	853.01	931.92	843.216	695.453	664.623	678.34	730.329	763.97	774.808	814.996	781.901
5545	217370	Cybc1	198.077	121.172	156.138	153.741	195.272	269.403	209.183	199.677	129.542	164.316	211.044	163.303	223.314	303.924	307.698	322.075	139.376	132.124	132.794	138.414	157.347	181.042	174.818	192.515	191.633	179.118	171.042	166.363	244.58	267.22	244.612	297.599
8973	319164	H2ac6	516.86	583.827	671.395	614.964	1028.05	912.976	851.465	920.249	554.151	567.052	546.797	519.46	708.005	538.6	574.369	486.151	345.499	342.06	353.382	316.986	471.351	482.007	542.629	576.145	309.995	332.783	360.25	327.964	341.451	300.218	294.818	247.613
9732	20249	Scd1	22.3366	5.5078	11.7104	5.76528	17.2298	0	8.83873	13.0224	21.5903	22.5532	31.9764	21.7738	10.1506	73.0957	16.4106	15.1922	12.7963	11.1162	15.7338	17.6578	16.9451	20.4828	25.7765	16.1013	24.4238	33.624	33.9341	30.9512	33.6642	37.2037	41.5237	45.6826
4966	74392	Specc1l	387.18	223.066	175.656	245.985	292.907	359.204	329.979	342.923	280.674	246.474	207.847	230.18	304.518	307.771	283.082	319.037	444.757	461.162	427.646	454.546	608.641	594.993	597.817	584.896	401.115	408.83	386.986	398.497	510.802	506.294	514.138	552.164
3645	72296	Rusc1	70.6974	52.3241	109.297	49.9658	86.1492	112.251	106.065	78.1343	71.9677	61.2159	83.1387	71.5424	93.8932	146.191	90.258	106.346	30.4344	36.2069	33.6704	33.322	66.3972	65.4129	61.1366	67.9053	39.767	39.5946	44.2172	41.9627	82.7864	74.4074	73.2326	82.4274
963	237911	Brip1	187.104	143.203	78.0691	134.523	212.501	142.185	197.398	169.291	136.739	157.872	214.242	167.969	129.42	126.956	147.695	164.076	206.815	224.229	223.735	244.076	233.773	212.427	242.233	210.716	229.835	213.371	217.658	232.729	185.153	191.195	204.221	205.903
6459	170721	Papln	162.806	209.296	261.532	213.316	350.34	246.952	347.657	355.945	248.288	191.702	191.858	150.861	228.389	203.899	278.979	209.653	87.4988	72.0962	77.0959	74.9032	100.633	100.762	109.715	108.858	86.7359	80.4461	71.296	71.4258	84.1604	76.3485	86.8222	69.5171
5313	66606	Lrrc57	125.467	99.1404	93.683	78.7922	120.609	89.8009	132.581	164.95	111.55	104.711	99.1269	110.424	149.722	111.567	135.387	136.73	112.4	120.69	121.78	122.181	157.002	139.415	149.702	157.162	118.988	127.582	120.312	134.221	124.351	138.462	147.22	159.227
5876	66950	Pacc1	33.2393	27.539	19.5173	40.357	63.1761	59.8673	35.3549	34.7264	25.1887	28.997	47.9646	40.437	63.4414	57.7071	32.8211	39.4998	17.6381	26.9964	20.1393	25.9171	20.7491	24.7776	24.1242	30.8024	16.9088	23.8824	20.5661	33.6297	29.1985	36.5567	27.1791	34.7585
7002	77480	Kidins220	662.483	418.593	413.766	409.335	614.531	576.222	683.529	542.6	518.167	538.055	444.472	500.797	588.736	627.084	611.293	616.805	619.063	627.269	608.271	598.087	843.452	809.402	935.225	866.668	728.331	708.931	724.956	725.567	848.131	910.682	962.971	915.97
306	22320	Vamp8	503.009	360.761	394.249	368.978	516.895	576.222	556.84	559.963	568.544	563.83	543.599	447.917	596.349	715.569	701.551	650.228	383.888	389.066	392.717	381.921	389.738	402.058	396.892	413.382	496.931	499.96	510.383	463.078	585.001	597.2	591.901	577.654
2582	56436	Adrm1	2235.93	2478.51	3829.29	2390.67	4428.07	4415.21	3889.04	4384.2	2266.98	2179.61	2414.22	2037.4	3626.31	3835.6	3893.4	3965.17	928.594	900.727	936.164	888.871	1563.1	1654.48	1586.58	1623.78	869.864	831.486	876.803	804.731	1515.57	1470.03	1449.55	1379.75
1479	68942	Chmp2b	574.354	413.085	195.173	370.9	551.355	463.971	559.786	416.716	345.445	488.116	431.682	483.689	657.252	642.473	623.601	467.921	562.69	584.71	603.236	554.797	642.185	632.324	676.138	676.253	658.191	677.193	649.89	675.272	755.383	808.776	786.307	750.453
4194	209446	Tfe3	319.139	280.898	363.021	274.812	488.179	516.355	400.689	416.716	367.035	347.964	390.112	317.275	373.035	477.046	459.495	413.229	220.995	203.267	218.386	215.026	263.168	281.143	270.323	304.174	227.643	233.482	247.136	205.349	282.023	276.601	281.983	276.744
1341	211064	Alkbh1	132.035	44.0624	58.5519	78.7922	80.406	127.218	109.011	60.7711	39.5822	61.2159	51.1623	35.7712	76.1296	61.5543	82.0528	78.9996	204.394	206.761	224.365	211.039	186.742	190.292	214.474	197.065	219.501	188.231	202.576	179.16	151.832	159.491	145.71	166.179
3606	140740	Sec63	818.309	872.987	409.863	870.558	987.845	1047.68	1081.27	1224.1	842.022	1005.23	930.514	965.822	1139.41	984.869	988.736	987.495	629.092	612.342	599.774	618.593	850.022	732.426	765.364	734.707	661.635	627.857	626.925	674.974	714.848	713.664	741.009	725.957
5488	231876	Lmtk2	320.708	187.265	199.076	161.428	235.475	291.853	238.646	308.197	248.288	217.477	191.858	185.077	304.518	280.841	291.287	303.845	302.269	300.772	294.223	295.911	404.954	400.736	389.292	393.081	391.408	370.806	377.046	370.224	529.352	463.591	493.754	519.392
7622	75782	Lca5	29.484	16.5234	19.5173	11.5306	11.4866	44.9004	23.57	13.0224	28.7871	27.386	28.7788	23.329	15.2259	30.7771	36.9237	30.3845	26.2842	31.1252	26.7475	32.7524	32.8528	35.019	31.725	41.3032	31.6257	41.1658	34.6197	37.7962	38.8168	40.1153	35.4839	34.4275
4316	108012	Ap1s2	307.668	126.679	42.938	167.193	241.218	172.118	173.828	164.95	201.509	180.426	214.242	172.635	225.851	150.039	184.619	218.768	325.094	352.859	363.137	366.542	437.115	436.416	437.54	447.685	391.408	392.803	430.175	447.304	485.039	531.851	533.013	522.702
7775	12282	Hyou1	2005.58	2324.29	2619.22	1985.18	3233.47	3779.12	3043.47	3624.56	1856.77	1810.7	1739.52	1743.46	2286.43	2504.49	2379.53	2941.22	1404.48	1426.36	1298.36	1430.28	1899.93	2000.05	1930.27	2063.06	1043.34	1079.42	1047.5	1191.03	1494.62	1670.28	1476.73	1845.84
5539	67226	Tmem19	280.501	223.066	230.304	224.846	287.164	463.971	271.054	377.649	287.871	244.863	182.266	231.735	403.487	403.95	397.956	467.921	210.966	193.104	207.057	201.641	245.877	279.161	266.688	291.573	202.279	206.457	203.605	217.551	312.252	338.715	297.083	323.42
3543	238799	Tnpo1	2806.19	2602.44	1920.5	2771.18	3692.93	3502.23	3777.09	3568.13	2173.42	2200.55	2212.77	2466.66	3050.26	2666.07	2736.46	2728.52	2759.15	2633.58	2659.65	2740.95	3644.93	3429.55	3750.81	3621.03	2291.14	2200.96	2250.96	2356.16	2654.32	2501.71	2750.38	2677.4
2229	75415	Arhgap12	321.017	126.679	58.5519	161.428	229.731	164.635	218.022	125.883	201.509	249.696	195.056	228.625	243.615	250.064	233.85	188.384	347.229	327.133	354.641	362.27	398.383	395.451	406.476	402.531	495.052	482.048	505.242	516.944	515.955	539.615	505.456	521.378
2632	13712	Elk1	43.1066	27.539	27.3242	15.3741	22.9731	14.9668	26.5162	56.4304	14.3935	25.7751	22.3835	17.108	15.2259	19.2357	36.9237	33.4229	49.11	73.6843	68.9143	64.6503	54.9852	52.1981	51.2226	55.3043	54.4839	62.22	63.755	69.045	61.1451	58.8789	61.5305	59.586
1770	72183	Snx6	513.069	506.718	234.207	511.188	666.221	516.355	665.851	681.505	525.364	431.733	412.496	531.902	596.349	592.46	553.856	501.344	426.081	459.891	458.484	502.962	516.307	534.866	546.925	521.541	445.265	481.105	481.59	447.602	526.947	571.32	530.37	526.343
1625	233532	Rsf1	271.769	203.789	136.621	197.941	229.731	246.952	329.979	247.425	241.092	231.976	188.661	251.954	266.454	192.357	250.261	309.922	279.789	268.693	278.489	291.354	327.836	307.903	336.417	314.325	304.359	314.557	317.061	318.44	299.199	318.334	319.732	303.227
722	98766	Ubac1	259.989	110.156	117.104	155.663	166.555	187.085	215.076	195.336	172.722	172.371	214.242	174.19	230.927	284.689	328.211	312.96	282.21	308.394	298.628	293.347	281.842	300.965	300.726	292.273	297.783	297.588	296.838	287.787	378.55	370.096	353.329	382.013
7540	19730	Ralgds	270.24	52.3241	89.7795	73.0269	103.379	142.185	73.6561	112.861	154.73	106.322	131.103	91.7609	129.42	138.497	106.669	60.7689	253.159	236.933	269.049	270.563	375.905	328.055	327.494	307.324	608.091	478.906	561.113	443.733	654.734	541.557	610.775	543.557
7067	19106	Eif2ak2	155.062	93.6326	39.0346	90.3228	91.8925	89.8009	153.205	104.179	136.739	91.8238	99.1269	87.0951	159.872	146.191	118.976	94.1918	161.856	160.073	185.974	151.8	211.987	219.695	259.418	173.614	201.027	185.089	177.554	172.315	227.748	252.985	247.255	222.455
5662	19271	Ptprj	145.35	55.078	46.8415	73.0269	86.1492	44.9004	106.065	91.1567	75.566	86.991	79.941	65.3213	126.883	126.956	90.258	148.884	130.384	135.935	133.738	121.041	219.941	242.16	221.744	211.417	165.017	170.319	170.356	140.173	287.176	283.072	279.718	289.654
2667	71175	Nipbl	707.816	498.456	269.339	547.702	631.761	598.673	724.776	698.868	492.978	428.511	399.705	474.357	494.843	484.74	471.803	467.921	905.769	869.601	878.893	898.269	1223.16	959.389	1100.79	1044.48	804.108	808.546	733.526	863.657	767.749	791.63	789.327	818.977
3121	56419	Diaph3	503.483	426.855	511.353	524.641	683.451	568.739	798.432	768.321	417.412	497.782	454.065	503.907	576.047	546.294	693.346	601.612	384.926	388.113	385.479	401.857	461.668	488.945	551.552	486.188	365.105	391.861	417.835	430.936	456.184	450.974	469.595	504.495
6417	631624	Gm7072	78.9516	2.7539	3.90346	13.4523	5.74328	14.9668	8.83873	17.3632	14.3935	6.44378	3.19764	23.329	7.61296	15.3886	12.3079	15.1922	135.571	141.652	153.877	147.813	141.44	125.209	153.668	157.162	148.422	151.151	155.274	148.209	128.13	120.993	131.366	142.675
1196	67246	Resf1	639.05	413.085	183.462	461.223	534.125	486.421	565.679	568.644	485.782	465.563	508.425	564.563	492.305	380.867	344.622	367.652	812.736	785.118	792.042	817.1	902.586	800.812	921.676	770.41	886.147	850.026	826.759	930.322	737.52	701.694	704.392	748.798
938	237859	Nsrp1	380.288	275.39	105.393	234.455	327.367	336.753	335.872	286.493	255.485	264.195	236.625	275.283	345.121	350.09	324.108	349.421	416.743	444.329	443.38	425.496	440.919	459.542	487.11	501.589	449.962	459.108	424.691	453.554	497.062	519.558	537.165	526.674
4345	224912	Crb3	39.4828	11.0156	27.3242	9.60881	11.4866	29.9336	17.6775	26.0448	35.9838	37.0517	67.1505	37.3265	50.7531	42.3186	77.9501	78.9996	31.1261	21.2795	24.8595	16.5186	19.02	23.7865	16.1929	21.3517	63.8777	69.4476	62.0412	41.3675	75.5726	66.3196	56.6232	53.9585
2518	109331	Rnf20	509.698	330.468	281.049	338.23	425.003	374.17	474.345	581.667	309.461	307.69	319.764	398.149	375.573	369.326	426.674	391.96	605.575	592.333	609.215	605.492	749.043	758.855	776.6	767.61	553.607	572.864	530.264	579.144	599.772	608.847	571.517	616.385
2715	70495	Atp6ap2	519.313	517.733	363.021	572.685	574.328	815.691	804.325	737.935	662.102	670.153	562.785	657.879	865.34	754.04	869.759	808.227	289.818	315.381	329.781	309.011	366.914	385.539	413.085	395.181	340.994	342.524	366.077	327.964	383.703	441.268	433.734	421.737
7783	268512	Slc26a11	27.3527	38.5546	54.6484	23.0611	34.4597	59.8673	55.9786	52.0896	17.9919	22.5532	44.767	52.8791	15.2259	61.5543	32.8211	21.2691	12.7963	12.3866	13.8458	11.9617	14.8702	14.5362	18.1758	16.8013	16.9088	20.74	15.4246	16.9636	17.8626	18.4401	19.6294	18.8689
1900	28200	Dhrs4	126.256	126.679	175.656	153.741	246.961	172.118	212.13	247.425	169.124	125.654	156.684	121.311	119.27	103.873	155.9	212.691	88.5364	91.7877	97.2352	86.5802	87.1463	103.075	108.063	102.208	69.8271	72.2758	77.8086	74.6995	83.8169	94.4651	84.1798	93.0204
3894	234673	Ces2e	555.164	793.123	651.877	747.565	872.979	1242.25	1187.34	1041.79	467.79	528.39	425.286	424.588	598.886	665.556	480.009	552.997	490.754	442.423	447.471	446.287	552.618	664.37	594.843	551.993	283.692	285.332	265.646	244.633	305.382	341.627	300.103	312.496
4076	208228	Mob3a	237.937	151.465	163.945	136.445	218.245	269.403	191.506	225.721	201.509	236.809	249.416	211.517	289.293	246.217	283.082	243.076	207.507	183.575	184.086	182.274	239.998	247.115	232.319	227.518	242.986	281.876	260.847	258.919	316.374	334.51	347.666	310.841
815	72507	Dzip1l	443.229	217.558	343.504	242.142	384.8	374.17	391.851	368.968	331.051	354.408	412.496	298.612	390.799	411.644	406.161	422.344	422.969	386.207	414.43	396.731	468.238	456.569	444.149	414.782	616.858	609.945	592.648	579.144	636.184	663.196	638.709	648.826
7283	19649	Robo3	18.8695	27.539	31.2277	34.5917	68.9194	22.4502	50.0862	34.7264	10.7951	9.66566	6.39528	0	10.1506	7.69429	0	3.03845	29.7427	25.0908	21.0834	18.797	32.5069	33.0368	25.1156	23.4518	4.69689	6.59909	5.82707	4.46411	8.93131	7.11723	8.30473	12.9103
1914	56382	Rab9	153.853	107.402	78.0691	132.602	155.069	134.701	141.42	225.721	158.329	173.982	137.499	143.085	172.56	165.427	184.619	203.576	135.917	138.793	122.724	142.686	135.215	146.353	152.346	155.762	144.664	142.038	152.875	150.589	180	180.519	184.214	190.675
123	57376	Smarce1	1040.39	691.229	651.877	697.599	1085.48	942.909	978.153	1037.45	712.48	658.876	591.564	612.776	634.414	596.307	730.27	650.228	1442.17	1415.25	1452.23	1423.73	1296.13	1337	1341.37	1257.3	1346.44	1256.66	1321.03	1276.74	1306.38	1184.7	1209.85	1113.6
7695	52428	Rhpn2	128.733	88.1248	50.7449	63.4181	120.609	67.3507	109.011	86.8159	230.297	188.48	220.637	153.972	261.378	261.606	266.671	227.883	40.8097	44.7822	39.964	29.6195	61.5557	66.0736	70.0593	50.4039	142.785	111.556	134.365	107.139	172.786	186.989	189.499	145.324
8554	12359	Cat	1094.48	801.385	671.395	809.061	1102.71	1189.86	1175.55	1098.22	1518.52	1622.22	1531.67	1665.69	1979.37	2273.66	1993.88	2087.41	428.156	435.753	456.596	426.92	651.522	660.736	664.902	657.001	842.935	825.201	868.577	853.539	1188.55	1162.7	1100.75	1184.44
6639	114863	Plpbp	546.175	421.347	448.898	401.648	700.681	688.473	592.195	546.94	331.051	331.854	431.682	381.041	499.918	630.931	562.061	619.843	435.073	476.407	457.226	463.944	708.928	758.195	685.391	746.608	401.428	423.599	426.405	472.899	673.283	738.574	679.101	795.805
9103	14705	Bscl2	33.9033	5.5078	11.7104	7.68705	11.4866	7.48341	17.6775	4.3408	3.59838	17.7204	12.7906	3.11054	5.07531	3.84714	8.20528	6.07689	52.9143	53.9928	51.2924	53.8278	71.5844	69.7077	69.3983	62.6549	50.4133	54.0497	58.9563	44.3435	62.8627	54.9968	63.0405	50.6481
3170	269823	Pon3	103.935	121.172	81.9726	101.853	155.069	172.118	162.043	125.883	133.14	140.152	99.1269	133.753	218.238	180.816	184.619	167.115	57.4103	61.9329	59.7886	57.5302	67.0888	74.3328	65.4327	62.3049	69.2009	57.5064	64.4406	64.5809	68.0153	76.025	56.2457	83.0894
7569	14359	Fxr1	996.064	1007.93	612.843	1160.74	1234.81	1421.85	1437.77	1484.55	536.159	581.551	604.354	623.663	883.104	727.11	763.091	820.381	1083.88	1106.22	1135.67	1137.22	1693.47	1788.28	1669.86	1800.89	551.102	562.18	549.459	582.418	799.696	793.895	805.559	918.287
9070	223645	Mroh6	11.1554	8.2617	7.80691	7.68705	0	22.4502	14.7312	8.68159	14.3935	17.7204	9.59292	20.2185	10.1506	30.7771	16.4106	33.4229	8.30028	2.54084	3.46145	3.41764	4.49564	5.61626	5.28749	6.65052	10.02	11.627	13.0252	7.14258	11.3359	11.3229	11.3246	7.94481
2081	76561	Snx7	146.649	93.6326	78.0691	92.2445	80.406	119.735	129.635	182.313	89.9596	106.322	121.51	107.314	131.958	138.497	118.976	161.038	158.051	160.073	159.227	160.914	177.059	170.14	175.479	169.413	166.27	160.578	149.105	163.387	206.794	212.87	201.578	203.586
7527	382620	Tmed8	24.8526	2.7539	19.5173	7.68705	5.74328	44.9004	5.89249	8.68159	7.19677	4.83283	9.59292	6.22108	10.1506	7.69429	4.10264	9.11534	40.118	41.2886	40.2787	41.5813	42.1899	51.5374	42.6304	44.4535	20.9794	32.9955	27.0788	29.7608	42.252	34.6156	28.3116	56.2757
4238	331401	Thoc2	712.392	525.995	183.462	511.188	637.504	486.421	677.636	646.779	557.749	589.605	473.251	625.218	634.414	611.696	500.522	528.69	789.91	814.973	785.748	839.315	1018.44	945.513	1048.25	966.075	807.239	809.803	785.627	868.122	837.825	836.275	876.904	863.998
3477	320011	Uggt1	662.013	586.581	468.415	534.25	763.857	942.909	819.056	672.823	518.167	573.496	524.413	587.892	700.393	600.154	705.654	689.727	578.599	615.835	558.552	587.264	773.25	752.248	800.725	757.109	625.626	586.377	556.314	600.275	745.077	752.485	733.836	811.032
6352	78506	Micu3	42.0331	13.7695	3.90346	24.9829	28.7164	7.48341	26.5162	26.0448	7.19677	28.997	25.5811	31.1054	25.3765	11.5414	32.8211	24.3076	64.3272	64.1561	56.3272	59.2391	64.6681	61.1181	73.6944	69.3054	55.7364	58.7634	64.0978	56.8431	61.4886	57.9084	57.7556	59.255
3406	27280	Phlda3	1467.5	1365.93	1779.98	1237.61	2033.12	2574.29	1856.13	2153.03	1194.66	1146.99	1406.96	1186.67	1674.85	1912.03	1801.06	1895.99	1060.71	1016.02	1107.66	1026.43	1366.68	1372.68	1331.46	1313.3	1144.16	1184.07	1226.43	1099.96	1631.34	1558.67	1516.75	1316.85
5629	170770	Bbc3	23.2297	22.0312	54.6484	17.2959	57.4328	67.3507	32.4087	60.7711	0	12.8876	19.1858	12.4422	17.7636	34.6243	8.20528	27.346	17.2923	13.9746	14.1605	6.55047	33.1986	33.0368	31.725	32.9026	7.51503	14.4552	8.56923	8.92823	11.6794	16.1755	8.68222	16.8827
4017	277854	Depdc5	110.614	38.5546	39.0346	44.2005	86.1492	37.417	64.8174	43.408	71.9677	53.1611	89.534	85.5398	88.8179	88.4843	90.258	75.9612	135.571	145.78	130.276	132.149	148.356	136.112	142.762	155.062	150.927	147.694	152.875	161.601	171.069	160.461	179.307	181.737
6846	19387	Rangap1	2165.61	2362.85	3060.31	2306.11	3669.96	3824.02	3650.4	3924.08	2097.86	2070.06	1972.94	1992.3	2748.28	2858.43	3019.54	3153.91	1338.42	1372.69	1293.01	1332.88	1964.6	2147.39	2047.91	2065.86	1149.17	1172.75	1084.18	1180.01	1622.41	1563.53	1442.76	1645.24
779	56724	Cript	235.232	159.726	58.5519	134.523	160.812	179.602	194.452	190.995	158.329	196.535	159.882	189.743	241.077	261.606	205.132	221.807	259.384	252.178	280.063	273.411	256.252	263.303	266.688	262.52	279.622	274.648	272.501	255.05	329.771	356.185	357.858	339.972
1068	53381	Prdx4	239.148	267.128	245.918	363.213	482.436	434.038	486.13	368.968	273.477	322.189	303.776	283.059	373.035	334.701	332.314	297.768	141.105	167.06	139.402	134.142	159.422	155.273	158.625	161.713	110.22	121.612	130.252	118.15	141.527	138.786	137.406	130.758
2214	64453	Zfp280b	133.653	55.078	66.3588	51.8876	91.8925	74.8341	109.011	34.7264	50.3774	75.7144	83.1387	68.4318	93.8932	96.1786	110.771	112.423	147.33	158.802	156.08	170.597	162.535	147.344	159.947	152.612	186.31	190.117	195.036	186.005	244.58	216.752	246.877	247.613
9911	11861	Arl4a	52.2955	22.0312	7.80691	17.2959	5.74328	37.417	26.5162	26.0448	32.3854	28.997	22.3835	34.2159	40.6025	30.7771	61.5396	48.6151	44.9599	45.4175	43.1107	41.8661	69.1637	55.8322	57.8319	63.3549	83.9178	89.8734	79.5224	77.378	102.023	113.229	100.412	110.896
5066	67933	Hcfc2	113.259	93.6326	66.3588	90.3228	143.582	112.251	126.689	121.542	82.7628	117.599	121.51	85.5398	81.2049	119.261	102.566	82.0381	106.866	121.325	125.871	114.491	152.506	144.371	135.492	149.812	105.837	98.6722	105.23	102.972	136.718	122.934	116.266	124.8
1593	270166	Clpx	558.356	506.718	327.89	578.45	798.316	651.056	686.475	737.935	636.914	512.28	585.168	496.131	636.951	550.141	627.704	619.843	480.725	501.18	540.93	530.019	587.2	584.421	658.623	587.346	482.84	454.709	490.16	480.636	504.619	507.911	506.589	459.144
731	76131	Depdc1a	343.417	209.296	74.1657	267.125	206.758	299.336	309.356	321.219	266.28	339.909	306.974	393.483	281.68	276.994	176.413	252.191	418.473	445.282	483.029	453.976	399.075	374.637	450.098	378.73	446.205	475.135	471.65	507.123	327.71	344.539	329.924	359.171
2594	193813	Mcfd2	316.18	145.957	281.049	203.707	356.084	396.621	291.678	204.017	187.116	206.201	214.242	220.848	261.378	303.924	352.827	309.922	311.607	328.721	338.907	324.391	354.118	358.119	403.832	399.031	301.854	303.558	311.234	308.619	398.474	462.944	437.886	522.702
3666	13367	Diaph1	1399.9	1330.13	1405.24	1335.62	1849.34	2132.77	1991.66	2005.45	2058.28	2103.89	2158.41	1958.08	2349.87	2281.36	2354.91	2394.3	590.704	576.77	634.704	599.511	832.731	782.972	873.097	734.357	957.226	937.386	996.772	956.213	1053.55	1038.15	1143.03	980.522
3017	240064	Zfp799	53.1098	35.8007	27.3242	34.5917	17.2298	59.8673	53.0324	56.4304	35.9838	40.2736	44.767	40.437	35.5272	38.4714	8.20528	27.346	64.673	59.3921	64.1941	65.5047	58.7892	60.127	61.4671	60.5547	70.4534	67.8764	80.8935	69.6402	69.3894	76.672	88.3321	73.1584
1433	71701	Pnpt1	610.153	575.565	304.47	543.858	648.991	628.606	751.292	803.047	543.356	497.782	447.67	600.334	697.855	542.447	590.78	589.459	599.004	647.913	645.088	637.674	683.338	722.185	707.202	755.359	574.899	559.038	583.736	632.119	584.314	619.846	560.947	636.578
2882	27402	Pdhx	388.726	341.484	335.697	349.761	482.436	478.938	559.786	464.465	345.445	414.013	332.555	363.933	614.112	492.434	553.856	583.382	245.204	279.174	291.076	282.24	339.248	360.762	331.79	356.678	285.571	300.416	291.354	296.417	422.176	428.328	407.687	420.082
1568	229906	Gtf2b	282.147	305.683	202.98	319.012	402.03	329.27	421.313	490.51	370.633	351.186	422.089	339.049	360.347	377.02	381.545	364.614	191.252	197.55	203.911	175.154	235.848	210.114	228.023	207.916	180.987	189.803	209.089	180.945	230.84	226.134	226.87	214.841
2372	100986	Akap9	452.276	231.328	101.49	244.064	281.421	254.436	335.872	303.856	208.706	257.751	198.254	290.835	274.067	261.606	205.132	243.076	572.72	571.371	528.972	582.707	708.582	645.209	677.79	679.753	674.474	688.191	664.972	696.402	651.985	652.844	669.286	663.391
2925	72137	Wdsub1	39.1244	19.2773	46.8415	17.2959	34.4597	52.3838	29.4624	34.7264	39.5822	22.5532	22.3835	29.5501	27.9142	42.3186	28.7185	72.9227	40.4639	38.4302	43.7401	41.2965	30.0862	37.3316	34.3687	41.3032	37.5751	44.6224	46.6166	47.9148	50.8398	48.5266	57.3781	51.9723
4666	15452	Hprt	1855.82	1679.88	706.526	2075.5	2326.03	2087.87	2330.48	2061.88	2094.26	2081.34	1896.2	2404.45	2847.25	2435.24	2555.94	2157.3	1353.64	1376.5	1439.65	1444.81	1672.72	1689.17	1755.78	1683.98	1475.14	1511.51	1553.77	1530.3	1765.31	1866.98	1828.55	1842.53
7300	68510	Ints1	540.731	514.979	827.533	561.154	872.979	927.942	863.25	954.975	564.946	578.329	597.959	569.228	680.091	654.014	701.551	783.919	319.215	304.9	305.551	289.93	453.022	474.739	470.587	471.837	317.823	328.384	328.03	348.796	417.023	416.358	448.833	414.785
4310	20955	Vamp7	282.045	151.465	70.2622	199.863	120.609	217.019	279.893	230.062	190.714	124.043	143.894	178.856	238.539	192.357	205.132	188.384	346.537	361.434	385.794	351.732	394.579	448.64	466.291	440.684	307.803	312.671	288.612	310.405	357.252	425.416	380.13	434.316
2357	217039	Ggnbp2	675.124	638.905	343.504	689.912	631.761	755.824	945.745	967.998	698.086	612.159	629.935	729.421	560.822	569.377	537.446	489.19	676.819	718.739	706.135	692.641	769.101	778.347	858.557	853.017	681.362	666.509	700.62	713.366	592.901	540.91	626.252	553.488
3018	105835	Sgsm3	88.0651	63.3397	97.5864	73.0269	91.8925	217.019	79.5486	104.179	147.534	90.2129	79.941	104.203	81.2049	100.026	98.4633	97.2303	67.094	67.3322	84.6481	74.9032	86.8005	71.3595	78.9819	79.4562	77.029	80.4461	60.6701	69.6402	75.2291	77.6425	78.895	74.4826
2897	231380	Uba6	948.294	889.51	421.573	1007	982.101	1025.23	1299.29	1267.51	831.226	961.733	847.375	1099.58	1147.02	915.62	1001.04	1130.3	871.184	879.447	872.285	925.895	1023.97	953.112	1069.73	1026.28	859.844	851.283	808.935	923.179	840.23	867.008	885.964	912.66
7281	15417	Hoxb9	29.5833	13.7695	23.4207	15.3741	11.4866	22.4502	26.5162	30.3856	7.19677	16.1094	3.19764	10.8869	10.1506	34.6243	8.20528	18.2307	44.2682	35.5717	37.4466	44.9989	49.4521	45.5908	48.9093	45.8536	39.767	28.9103	32.9058	32.1416	43.2825	43.6739	45.2985	47.0068
1962	22619	Siae	83.3513	68.8475	58.5519	121.071	160.812	82.3175	88.3873	190.995	86.3612	72.4925	67.1505	91.7609	134.496	100.026	118.976	75.9612	74.3567	74.6371	67.0262	78.3209	59.8266	77.9669	79.3124	73.8558	51.0396	51.85	55.5286	59.2239	72.1375	59.8494	67.1928	63.5585
1756	70699	Nup205	1576.41	1699.16	1284.24	1604.67	2303.06	2110.32	2236.2	2391.78	1615.67	1482.07	1429.35	1628.37	1799.2	1615.8	1636.95	1704.57	1385.46	1332.67	1339.58	1383.86	1776.47	1686.53	1786.51	1723.88	1214.93	1141.01	1126.68	1278.52	1264.47	1294.69	1271.76	1320.16
6409	76303	Osbp	861.415	771.092	808.016	832.123	1177.37	1182.38	1128.41	1250.15	935.58	839.302	869.758	922.275	964.309	1138.75	1046.17	1203.22	620.1	549.138	594.11	615.46	847.601	802.134	821.875	837.265	615.919	664.309	648.176	693.723	799.352	812.982	855.765	857.046
2706	320940	Atp11c	225.799	140.449	85.876	165.271	201.015	157.152	191.506	247.425	158.329	196.535	150.289	164.859	190.324	211.593	201.029	164.076	262.496	276.316	264.643	276.544	313.312	290.063	349.635	295.773	265.218	249.509	262.561	243.145	250.077	234.545	271.414	268.799
1788	101142	Itfg2	208.281	239.589	210.787	242.142	338.854	441.521	274.001	377.649	269.879	177.204	230.23	222.403	195.399	273.147	266.671	249.153	150.443	152.133	157.338	143.541	170.143	180.051	174.818	169.063	149.674	142.98	142.592	154.161	145.993	128.757	148.353	138.041
5384	332397	Nanos1	53.5998	19.2773	42.938	5.76528	11.4866	59.8673	26.5162	21.704	7.19677	17.7204	12.7906	18.6632	30.4518	26.93	45.129	33.4229	43.9223	59.0745	57.5859	47.5621	115.158	113.647	95.5053	102.208	51.9789	54.0497	57.5852	52.9742	107.519	109.67	100.412	112.882
1484	67443	Map1lc3b	513.169	429.609	417.67	426.631	626.018	651.056	612.819	616.393	345.445	443.01	409.298	384.151	560.822	573.224	607.19	622.882	441.644	498.322	472.015	476.191	535.673	559.643	590.547	572.995	409.569	382.747	426.062	407.425	554.772	623.728	636.822	593.874
5549	72061	Aopep	101.524	77.1092	54.6484	67.2616	114.866	59.8673	106.065	91.1567	97.1563	93.4347	51.1623	82.4293	93.8932	107.72	110.771	91.1534	77.8152	85.118	104.158	100.536	99.5958	112.655	112.029	114.109	112.412	122.24	144.306	125.888	128.473	126.816	140.048	142.344
3796	12235	Bub1	735.256	570.057	296.663	605.355	729.397	643.573	824.948	729.254	676.496	634.712	639.528	808.74	771.447	623.237	627.704	668.458	662.294	717.469	663.024	745.045	874.575	837.153	893.586	890.82	850.764	822.059	826.759	900.858	784.581	815.246	807.069	852.08
7797	59010	Sqor	446.356	294.667	273.242	276.734	390.543	381.654	430.152	425.398	683.693	633.101	671.505	684.318	911.018	773.276	750.783	847.727	185.719	211.842	201.079	194.521	277.347	286.429	240.911	301.374	400.175	385.576	382.873	384.509	460.306	518.587	468.84	509.13
2251	320398	Lrig3	79.9082	79.8631	101.49	73.0269	103.379	52.3838	135.527	151.928	61.1725	66.0487	73.5458	48.2133	71.0543	53.86	61.5396	100.269	81.9653	79.4011	91.8857	99.1115	88.5296	93.8245	92.5311	92.7572	66.6959	66.9337	56.8997	67.5569	60.4581	74.7309	63.0405	67.5309
1739	237436	Gas2l3	744.361	349.745	261.532	313.247	373.313	321.787	503.808	555.622	777.251	700.761	837.782	729.421	672.478	665.556	607.19	616.805	624.942	575.182	651.381	609.479	677.113	650.825	791.141	688.504	1239.67	1212.98	1248.71	1326.73	1064.54	1032.97	1135.48	1259.25
396	70675	Vcpip1	398.766	316.699	257.628	428.553	430.746	449.004	521.485	599.03	431.806	409.18	463.658	443.252	456.778	334.701	385.648	391.96	354.145	340.154	367.228	363.694	377.634	316.823	343.026	361.578	427.73	418.885	409.266	427.067	386.794	361.361	398.25	387.971
4167	77626	Smpd4	472.411	509.472	687.008	518.876	832.776	860.592	757.185	855.137	349.043	362.462	380.519	365.488	456.778	538.6	451.29	355.498	424.698	374.456	404.989	406.129	559.88	504.142	539.985	514.19	295.591	272.134	297.181	275.882	376.489	355.862	390.322	372.082
1116	66371	Chmp4c	207.016	82.617	113.2	82.6357	143.582	112.251	120.796	147.587	104.353	78.9362	70.3481	80.874	78.6673	92.3314	77.9501	106.346	324.057	361.752	329.152	351.162	321.957	338.958	336.747	327.276	251.127	280.933	275.244	263.68	284.771	290.512	291.421	296.275
7327	234515	Inpp4b	25.0314	13.7695	3.90346	7.68705	11.4866	7.48341	11.785	17.3632	28.7871	20.9423	12.7906	32.6606	22.8389	11.5414	8.20528	15.1922	16.2547	13.0218	24.2301	22.2147	19.3658	14.8666	22.8023	23.8019	65.1302	43.6797	66.84	58.0335	38.4733	26.2043	47.941	46.6757
6709	94088	Trim6	62.1407	22.0312	58.5519	30.7482	57.4328	37.417	35.3549	69.4527	32.3854	35.4408	28.7788	41.9923	73.592	23.0829	41.0264	57.7305	52.9143	50.8167	50.9777	55.5366	105.475	75.6543	87.5741	91.3571	54.7971	64.1055	72.3243	63.9856	120.916	120.993	97.3919	116.524
1434	11852	Rhob	373.092	327.714	382.539	305.56	505.409	553.772	474.345	442.761	456.995	576.718	572.378	477.468	499.918	453.963	459.495	446.652	239.671	210.254	214.924	197.653	247.606	243.151	216.457	233.468	352.267	428.941	399.669	388.973	363.779	332.245	293.308	267.806
388	69276	Sec62	578.365	424.101	370.828	549.624	539.869	606.156	774.862	707.55	313.059	365.684	345.345	384.151	499.918	465.504	467.701	449.69	766.047	777.178	754.281	779.222	767.026	801.803	862.192	814.514	501.002	516.301	498.386	528.254	559.237	589.113	581.331	569.378
4435	52708	Zfp410	170.519	118.418	97.5864	78.7922	126.352	164.635	150.258	121.542	89.9596	111.155	115.115	99.5372	124.345	115.414	139.49	136.73	191.598	196.915	193.526	203.349	225.474	238.195	244.547	246.769	216.37	198.916	192.979	196.719	256.26	211.899	241.592	241.655
3793	237943	Gpatch8	435.025	410.331	359.118	343.995	499.666	486.421	536.217	607.711	395.822	420.456	393.31	335.938	469.466	407.797	521.035	549.959	382.159	373.185	371.634	350.593	490.717	459.872	498.677	465.536	389.842	372.377	352.709	374.688	469.237	449.68	464.31	483.309
8198	56805	Zbtb33	294.266	388.3	206.883	418.944	505.409	351.72	624.604	494.851	474.987	431.733	367.729	505.462	545.596	507.823	496.419	461.844	109.633	117.831	112.654	126.168	215.791	137.763	130.865	148.412	149.361	147.694	116.541	177.374	143.244	150.109	182.704	173.793
5369	231093	Agbl5	23.0407	19.2773	31.2277	5.76528	17.2298	22.4502	26.5162	21.704	32.3854	14.4985	9.59292	26.4396	10.1506	23.0829	32.8211	12.1538	25.5925	24.7732	28.0063	25.0627	27.6655	29.4028	20.489	24.5019	24.737	25.1394	19.5378	30.0584	29.542	25.2338	23.4042	25.8206
3640	75547	Akap13	453.947	346.991	261.532	307.482	419.26	374.17	462.56	512.214	435.404	415.624	447.67	370.154	441.552	438.574	365.135	413.229	396.339	336.026	377.298	334.074	497.979	392.147	466.621	450.835	615.606	593.919	600.189	584.799	590.153	588.466	645.127	591.226
467	101314	Brk1	743.809	382.792	312.277	463.144	654.734	561.256	565.679	581.667	417.412	470.396	351.741	441.696	596.349	550.141	541.548	452.729	935.857	955.037	922.004	934.439	1035.73	1054.2	998.345	1031.88	853.269	855.368	869.605	859.491	1109.2	1073.73	1096.22	1130.15
2223	20535	Slc4a2	267.229	179.004	327.89	178.724	356.084	314.303	268.108	347.264	305.863	306.079	290.985	264.396	289.293	407.797	410.264	315.998	201.282	191.198	194.47	189.964	209.566	217.052	234.632	226.468	218.875	227.512	247.136	244.336	294.046	259.132	301.235	265.158
1418	19166	Psma2	1589.43	1732.2	1557.48	1929.45	2475.36	2611.71	2657.51	2548.05	1568.89	1586.78	1602.02	1592.6	2380.32	2292.9	2313.89	2309.22	965.254	1053.81	1031.2	1032.41	1279.53	1361.45	1323.19	1332.9	892.096	877.68	934.046	876.157	1264.81	1290.81	1318.56	1280.11
3741	71804	Mtfr2	95.2165	85.3709	85.876	115.306	132.096	187.085	150.258	117.202	97.1563	104.711	105.522	113.535	177.636	142.344	106.669	106.346	65.7106	67.9674	69.8583	65.7895	88.5296	69.7077	76.0077	76.306	65.4434	52.7928	68.211	74.1043	77.9772	64.0551	70.9677	71.1722
5135	109032	Sp110	45.699	63.3397	46.8415	42.2787	80.406	142.185	64.8174	30.3856	35.9838	28.997	47.9646	12.4422	38.0648	34.6243	61.5396	39.4998	41.8473	48.2759	44.9988	48.9862	42.8815	58.4751	51.2226	53.9042	33.8176	34.2524	32.9058	30.0584	33.6642	32.9981	24.9142	34.0965
9346	80884	Maged2	521.084	346.991	277.145	330.543	482.436	493.905	462.56	460.124	741.267	858.633	885.747	748.084	1096.27	1061.81	1107.71	1145.49	162.893	168.33	179.681	161.199	215.445	248.767	251.817	248.519	439.316	470.107	465.823	441.352	570.917	553.203	508.476	569.047
4688	17859	Mxi1	122.708	30.2929	31.2277	23.0611	51.6895	29.9336	32.4087	43.408	129.542	154.651	105.522	80.874	119.27	142.344	123.079	106.346	96.8366	89.5645	90.627	91.7066	97.8667	89.1994	90.8788	99.7578	272.107	234.739	231.712	200.588	231.527	249.427	232.155	201.599
1147	70834	Spag9	1465.45	762.83	503.546	812.905	964.872	1070.13	1116.63	994.042	1003.95	989.12	1080.8	967.377	1167.32	1054.12	1128.23	975.341	1640.34	1551.18	1584.4	1517.43	1944.19	1762.84	1955.05	1783.74	2040.64	1963.39	2029.54	2076.41	2250.69	2216.05	2358.54	2163.3
3321	17826	Fam89b	237.834	239.589	300.566	157.584	315.881	396.621	274.001	347.264	284.272	248.085	255.811	231.735	218.238	300.077	393.853	407.152	143.872	166.107	167.408	157.781	185.359	191.283	174.487	190.415	165.644	161.206	182.696	186.898	237.71	232.604	240.837	217.82
9006	269587	Epb41	301.705	187.265	171.752	172.959	281.421	217.019	253.377	273.47	194.313	136.93	188.661	155.527	238.539	296.23	242.056	273.46	313.336	340.79	311.845	308.442	458.21	453.265	429.278	468.687	309.369	309.843	299.923	307.726	466.146	428.975	446.946	417.102
6388	56738	Mocs1	83.4026	77.1092	121.007	71.1052	143.582	149.668	88.3873	130.224	79.1644	80.5472	79.941	77.7634	101.506	169.274	98.4633	136.73	46.6891	49.2287	52.8657	50.1254	76.7717	99.7711	69.3983	81.5564	46.6558	41.1658	37.3618	46.4268	70.7634	82.1717	61.5305	68.524
3632	69149	Kbtbd3	17.3149	16.5234	0	9.60881	17.2298	22.4502	11.785	8.68159	14.3935	19.3313	9.59292	17.108	7.61296	15.3886	28.7185	6.07689	23.5175	24.7732	26.1182	25.3475	17.2909	17.1791	22.1414	16.4513	23.4845	20.4258	20.9089	22.6182	15.458	23.6163	14.722	18.2068
7513	70110	Ifi35	213.036	324.96	230.304	222.924	315.881	359.204	391.851	416.716	244.69	248.085	230.23	181.966	350.196	403.95	287.185	303.845	118.279	113.385	104.473	113.067	147.319	167.166	152.015	149.112	103.645	98.3579	117.57	99.9962	157.672	158.197	147.22	144.662
3830	74182	Gpcpd1	117.089	71.6014	15.6138	49.9658	57.4328	97.2843	88.3873	34.7264	151.132	104.711	118.313	101.092	101.506	69.2486	53.3343	51.6536	137.646	133.076	160.485	114.776	122.766	147.675	156.311	133.71	190.068	186.66	205.319	155.946	163.512	152.697	165.717	137.379
960	70640	Dcp2	644.887	110.156	54.6484	149.897	155.069	82.3175	215.076	160.609	187.116	177.204	179.068	205.296	261.378	207.746	196.927	249.153	888.476	968.376	917.283	974.597	950.655	870.189	870.123	941.223	1141.34	1180.61	1072.18	1186.86	1325.96	1272.04	1369.15	1470.78
5753	23879	Fxr2	720.216	561.796	601.132	538.093	890.209	860.592	777.809	790.025	633.315	687.873	690.691	600.334	738.457	792.511	742.577	796.073	621.484	618.694	584.355	626.282	820.973	866.225	824.518	847.066	630.01	634.142	649.205	630.631	851.222	826.246	819.526	774.619
9684	15925	Ide	1235.91	1319.12	929.023	1252.99	1682.78	1646.35	1867.92	1662.52	1054.33	1116.38	1077.61	1146.23	1438.85	1315.72	1382.59	1239.69	1008.83	1026.82	1068.64	1120.7	1471.8	1579.16	1555.18	1513.52	904.308	898.734	824.017	916.334	1073.13	1071.14	1070.93	1077.85
6641	382090	Cep162	114.069	71.6014	42.938	46.1223	57.4328	52.3838	88.3873	86.8159	64.7709	69.2706	73.5458	88.6503	63.4414	100.026	73.8475	91.1534	133.842	130.535	125.556	129.585	155.618	153.952	169.2	160.663	145.917	155.864	153.218	183.624	153.55	171.137	163.075	180.413
10159	19041	Ppl	1154.67	671.952	850.954	607.277	855.749	1055.16	1066.54	1054.81	644.111	644.378	770.632	586.336	796.823	827.136	853.349	789.996	1402.75	1202.45	1296.47	1189.34	1824.54	1879.13	1930.93	1793.54	1253.13	1287.45	1267.22	1177.04	1510.42	1654.11	1576.01	1475.09
7584	78388	Mvp	431.524	297.421	343.504	288.264	384.8	411.587	471.399	486.169	752.062	679.818	697.086	648.547	857.727	988.716	726.167	935.842	153.901	137.84	155.136	125.313	208.874	240.508	223.727	211.417	349.136	335.611	318.775	303.56	411.527	463.267	408.064	361.489
9305	51886	Fubp1	2791.29	2588.67	3150.09	2550.18	3802.05	3838.99	3847.8	4514.43	1777.6	1942.8	1905.79	2062.29	2654.39	2546.81	2609.28	2992.87	2545.07	2746.64	2450.39	2715.88	3707.18	3816.41	3913.74	4018.66	1800.16	1895.2	1775.54	2091.59	2392.56	2573.2	2452.16	2851.52
2007	16412	Itgb1	7769.37	7182.17	3872.23	7873.46	9074.39	8635.85	10011.3	9106.99	6790.15	6764.35	7002.83	7833.89	8526.52	7540.4	7799.11	7188.96	7494.46	7833.4	7713.99	7935.19	8528.23	8419.76	9248.15	8699.23	6980.83	6879.71	7204.32	7415.19	7627.68	7755.52	7963.11	7949.11
5991	24061	Smc1a	1437.03	1214.47	800.209	1083.87	1435.82	1339.53	1788.37	1428.12	1093.91	1089	1052.02	1127.57	1385.56	1304.18	1341.56	1260.96	1528.98	1556.9	1501.01	1506.04	1999.52	2090.57	2157.63	2106.46	1323.27	1285.25	1291.21	1363.94	1466.8	1552.53	1532.98	1539.64
7866	13205	Ddx3x	8166.45	6141.2	3493.59	6799.19	8132.49	7685.46	8850.52	7283.86	7459.45	6641.92	7488.88	7098.25	9064.5	7563.48	8184.76	6812.2	7828.9	7060.35	8009.16	7526.49	10094.4	9847.94	11746.2	9988.38	9481.77	8710.18	9196.49	8599.67	9302.99	9127.85	9776.56	8162.96
6386	20843	Stag2	983.448	539.765	273.242	701.443	827.033	621.123	813.163	742.276	636.914	639.545	610.749	707.647	834.888	619.39	722.064	583.382	1177.26	1216.43	1223.15	1224.94	1555.15	1552.73	1649.04	1599.62	1131.95	1116.5	1157.53	1219	1139.43	1229.34	1197.39	1224.82
8698	56807	Scamp5	12.6246	11.0156	3.90346	11.5306	17.2298	14.9668	20.6237	0	14.3935	20.9423	9.59292	9.33161	10.1506	7.69429	4.10264	9.11534	14.8713	18.4211	15.1045	16.8034	13.4869	21.1436	25.4461	19.6015	11.5857	7.54182	11.6541	3.8689	11.3359	10.3523	13.967	11.5862
9030	195733	Grhl1	178.181	93.6326	58.5519	76.8705	126.352	172.118	79.5486	112.861	230.297	277.082	207.847	195.964	220.776	207.746	262.569	246.114	95.4533	87.6589	90.3123	91.7066	141.44	136.112	125.908	104.658	275.551	285.018	260.504	227.075	263.13	270.455	267.261	233.048
8913	53417	Hif3a	30.7014	46.8163	81.9726	34.5917	103.379	104.768	44.1937	60.7711	7.19677	8.05472	9.59292	3.11054	25.3765	38.4714	12.3079	27.346	29.051	32.0781	30.209	29.0499	50.1437	42.6175	32.0554	34.6527	4.07064	7.22758	3.42769	8.33301	8.93131	10.0288	11.3246	10.5931
3557	380836	Mrs2	101.724	55.078	97.5864	55.7311	86.1492	119.735	82.4948	95.4975	75.566	53.1611	89.534	37.3265	65.979	57.7071	94.3607	88.1149	118.971	142.287	129.332	145.534	146.281	150.978	135.822	148.762	110.847	104.014	112.085	101.484	109.237	108.376	121.551	113.876
9058	234699	Edc4	621.719	740.799	1096.87	739.878	1102.71	1197.35	1234.48	1328.28	521.766	642.767	575.575	612.776	758.759	796.359	820.528	908.496	400.835	362.704	358.417	365.118	509.045	531.893	560.805	518.04	272.733	283.761	269.074	288.084	368.245	381.742	350.686	374.73
4417	319277	Washc4	532.497	391.054	156.138	417.022	425.003	493.905	512.647	533.918	363.437	380.183	322.962	398.149	446.627	480.893	430.777	416.267	574.103	584.71	569.88	581.853	710.657	720.202	767.017	756.759	567.698	571.293	579.965	597.596	664.008	700.077	645.127	747.474
9647	11847	Arg2	24.7543	13.7695	7.80691	21.1394	51.6895	22.4502	8.83873	17.3632	50.3774	72.4925	35.1741	26.4396	60.9037	73.0957	61.5396	45.5767	4.49599	5.71688	5.03483	6.26567	7.95383	6.27699	10.9055	7.00055	19.4138	16.9691	17.824	14.2852	22.6718	22.9692	14.722	16.2206
3558	235072	Septin7	2045.73	1707.42	819.726	2046.68	2314.54	2050.45	2498.42	2066.22	1460.94	1499.79	1263.07	1732.57	1918.47	1785.07	1579.52	1482.76	2425.76	2492.88	2474.62	2570.92	2850.58	2797.23	3015.85	2961.58	1818.95	1816.95	1850.61	1972.54	2039.43	2034.88	2068.63	2000.44
6456	235134	Nfrkb	229.36	253.359	304.47	315.169	390.543	366.687	444.883	464.465	205.108	143.374	179.068	130.643	223.314	161.58	176.413	179.268	236.212	204.855	212.722	195.09	278.384	274.866	315.267	267.071	139.341	131.039	134.023	133.923	159.389	154.315	177.419	157.903
1193	107035	Fbxo38	882.894	713.26	460.608	786	941.898	912.976	1107.79	902.886	885.202	908.572	968.885	953.38	1035.36	850.219	939.504	865.957	744.951	764.157	781.972	793.177	852.097	869.859	950.427	917.772	919.025	896.534	957.697	957.701	938.131	896.448	950.514	946.756
1463	231713	Naa25	1059.23	1148.38	1069.55	1055.05	1407.1	1676.28	1635.17	1593.07	982.359	1068.06	1147.95	1102.69	1271.36	1311.88	1321.05	1109.03	809.278	816.561	833.579	822.512	1030.54	1061.8	1081.95	1037.13	724.261	706.417	727.356	750.567	891.757	902.918	859.162	881.211
1158	74591	Abca12	1931.17	1779.02	1338.89	1677.7	2170.96	2327.34	2536.72	2300.62	2101.46	2020.12	1950.56	1982.97	2288.96	2131.32	2112.86	1971.95	1592.62	1656.31	1703.03	1743.57	2058.66	1983.86	2220.75	1958.75	1807.05	1737.76	1697.39	1775.23	1834.35	1770.25	1847.43	1787.91
3903	68618	Eola1	116.172	88.1248	58.5519	115.306	126.352	119.735	147.312	134.565	86.3612	114.377	70.3481	107.314	129.42	142.344	114.874	118.499	100.641	114.338	120.207	114.491	117.578	131.156	131.526	142.111	90.1803	106.214	104.202	101.484	127.099	137.815	130.233	158.565
1580	56469	Pias1	273.956	360.761	304.47	342.074	499.666	486.421	477.292	512.214	273.477	293.192	313.369	290.835	373.035	361.631	336.416	303.845	186.756	187.704	185.659	201.925	237.923	213.748	219.761	222.617	159.381	147.38	145.334	163.387	192.023	166.608	167.227	166.51
6545	225659	Cep76	210.542	121.172	121.007	163.35	160.812	149.668	220.968	243.085	205.108	177.204	204.649	181.966	299.443	234.676	196.927	221.807	166.352	174.683	174.96	196.514	245.185	215.4	236.285	243.269	224.198	207.4	219.029	236.896	261.413	259.779	275.944	287.668
7863	16396	Itch	503.622	264.374	195.173	288.264	361.827	389.137	385.958	364.627	284.272	309.301	348.543	337.493	527.832	465.504	488.214	410.19	544.706	530.082	517.958	583.562	754.23	748.284	779.905	745.208	522.607	544.268	537.462	565.157	691.833	711.4	710.81	704.108
3512	21969	Top1	1638.66	1481.6	815.822	1402.89	1883.8	1751.12	1823.73	1788.41	1806.39	1607.72	1531.67	1825.89	2154.47	1769.69	1743.62	1765.34	1458.77	1413.02	1328.57	1425.44	1771.28	1678.6	1812.95	1731.24	1757.26	1548.9	1533.89	1616.9	1716.87	1620.79	1649.62	1582.34
4838	382014	Ano8	15.3352	8.2617	15.6138	5.76528	5.74328	14.9668	14.7312	13.0224	21.5903	20.9423	9.59292	21.7738	17.7636	19.2357	16.4106	33.4229	11.7587	13.0218	12.2724	13.3858	11.7578	10.2414	6.2789	12.601	15.9694	26.3964	17.824	15.178	18.2061	20.0577	14.722	16.8827
3949	110521	Hivep1	69.7004	30.2929	27.3242	7.68705	28.7164	44.9004	11.785	39.0672	53.9757	45.1064	51.1623	48.2133	27.9142	53.86	28.7185	42.5383	100.295	91.7877	101.641	101.96	107.204	91.5119	92.2006	70.3555	113.039	118.155	107.629	121.424	103.397	95.1121	100.789	102.951
6049	244668	Sipa1l2	76.4052	35.8007	19.5173	32.6699	57.4328	59.8673	29.4624	43.408	68.3693	74.1034	67.1505	55.9897	71.0543	53.86	73.8475	75.9612	58.102	46.6879	59.474	55.5366	99.5958	96.7978	91.2092	99.7578	120.24	119.412	112.771	97.9129	127.786	125.522	120.419	118.841
1047	66578	Mis18a	241.111	212.05	156.138	184.489	287.164	209.535	268.108	299.515	187.116	175.593	243.021	181.966	215.701	242.37	250.261	203.576	252.467	252.178	267.475	236.387	291.179	249.097	262.061	267.421	233.592	232.54	241.995	233.92	288.206	285.66	276.321	287.337
5297	226971	Plekhb2	545.585	443.378	476.222	397.805	689.194	680.99	606.926	568.644	410.216	431.733	412.496	410.591	515.144	642.473	664.627	674.535	477.266	451.316	448.1	457.964	601.724	655.45	590.877	603.797	488.164	497.132	470.965	505.933	624.848	659.961	675.703	678.95
840	11429	Aco2	2543.76	2740.13	2861.23	2794.24	3916.92	4078.46	4089.39	4119.42	2792.35	2603.29	2753.17	2312.68	3004.58	2931.52	3228.78	3576.25	1802.89	1721.42	1725.06	1763.79	2127.13	2175.14	2243.55	2163.87	1751	1701.94	1806.39	1721.07	2096.11	2130.96	2040.32	2083.53
489	15982	Ifrd1	926.752	760.077	402.056	703.365	746.627	898.009	1031.19	963.657	874.407	699.15	812.201	810.295	685.167	654.014	660.525	492.228	1168.96	1079.54	1149.83	1072.57	1092.79	1032.4	1023.13	1012.63	1315.76	1105.82	1232.25	1114.84	1107.14	980.56	1009.02	1039.11
6896	67287	Parp6	67.7688	16.5234	3.90346	7.68705	11.4866	14.9668	20.6237	4.3408	14.3935	12.8876	6.39528	4.66581	15.2259	15.3886	8.20528	3.03845	130.729	114.338	148.842	129.016	144.898	124.879	140.119	141.411	107.402	113.442	113.457	106.841	108.206	111.288	107.584	98.648
6737	74682	Wdr35	164.166	148.711	78.0691	130.68	218.245	157.152	173.828	173.632	118.747	178.815	140.696	185.077	218.238	200.051	205.132	188.384	120.7	125.771	125.871	138.984	178.442	160.559	164.573	172.913	156.25	147.694	153.561	161.899	183.435	195.4	198.936	188.689
1777	74255	Smu1	1128.54	1087.79	796.305	1254.91	1636.84	1586.48	1567.4	1410.76	1263.03	1279.09	1240.68	1203.78	1837.26	1396.51	1357.97	1428.07	828.645	842.605	837.985	832.765	973.133	996.72	1042.3	1010.53	862.036	828.658	855.209	832.111	962.864	963.738	993.925	974.563
2092	28030	Gfm1	772.868	784.862	659.684	812.905	1033.79	1077.61	1187.34	1085.2	755.66	689.484	872.956	802.519	1058.2	1027.19	1005.15	996.61	570.99	619.647	572.397	583.847	690.6	750.266	754.459	759.909	561.122	524.785	541.232	562.181	627.253	681.313	663.246	646.509
7478	223827	Gxylt1	401.501	209.296	160.042	196.02	264.191	164.635	335.872	282.152	230.297	204.59	220.637	211.517	314.669	246.217	274.877	288.652	453.403	426.225	411.912	428.914	664.317	528.258	557.5	579.995	529.809	479.534	509.355	479.148	731.68	644.109	752.333	666.371
5228	24086	Tlk2	535.282	250.605	132.718	224.846	287.164	336.753	253.377	381.99	226.698	293.192	236.625	233.29	324.82	303.924	287.185	273.46	683.044	699.048	697.639	683.243	885.641	915.119	909.779	901.32	712.049	683.478	711.246	666.641	827.52	874.449	839.155	857.708
1293	13507	Dsc3	8471.83	7603.52	4750.51	8659.46	9637.23	9114.79	11216.4	10656.7	9726.43	10004	9845.54	9973.94	10533.8	9956.41	10441.2	9516.41	6530.25	6576	6918.49	7184.73	7115.91	7000.83	8283.85	7407.63	8126.87	7858.89	8195.95	8050.58	7586.12	7980.68	8446.29	7727.32
7985	22416	Wnt3a	92.8054	68.8475	136.621	82.6357	155.069	112.251	120.796	134.565	115.148	64.4378	118.313	73.0976	63.4414	92.3314	98.4633	54.692	87.8447	86.706	88.7389	83.7321	117.578	132.147	107.402	89.257	79.534	79.8176	86.3778	58.3311	81.0688	75.0544	77.385	55.2826
9254	19341	Rab4a	36.1964	24.7851	11.7104	19.2176	5.74328	29.9336	41.2474	21.704	21.5903	24.1642	22.3835	23.329	32.9895	30.7771	53.3343	45.5767	37.3513	37.4773	31.153	36.17	40.4608	46.9123	48.9093	52.5041	33.1914	34.2524	37.7046	36.6057	57.023	66.6432	59.6431	57.5998
6758	16516	Kcnj15	46.3118	35.8007	42.938	49.9658	57.4328	67.3507	55.9786	69.4527	35.9838	53.1611	35.1741	45.1028	60.9037	92.3314	36.9237	72.9227	35.6221	28.902	35.5585	38.1636	48.7604	41.6264	41.3085	32.5525	24.737	39.9088	33.2486	31.2488	46.0306	54.3498	39.2587	52.9654
4434	19185	Psmd4	2094.49	2139.78	2443.56	2154.29	3210.5	3300.18	3131.86	3299.01	1957.52	1952.46	2014.51	1810.33	3078.17	3189.28	3040.05	3053.64	1245.04	1290.11	1344.3	1321.2	1891.97	2078.68	1996.03	2022.11	1138.21	1114.93	1170.21	1177.34	1795.88	1922.3	1864.03	1781.62
1716	67333	Stk35	304.459	173.496	277.145	190.254	246.961	329.27	309.356	312.537	266.28	252.918	358.136	195.964	263.916	211.593	328.211	218.768	311.607	273.458	267.161	277.683	328.528	291.385	290.812	286.322	408.316	357.922	387.329	366.355	455.497	380.772	414.104	406.178
7656	56445	Dnaja2	2398.69	1902.95	1104.68	2252.3	2641.91	2536.87	2521.99	2539.37	1788.4	1844.53	1710.74	2250.47	2771.12	2096.69	2654.41	2354.8	2271.86	2346.46	2345.92	2426.52	3020.73	3180.78	3247.18	3306.36	2002.75	2024.35	2063.81	2191.88	2705.5	2679.31	2820.21	2754.53
2257	109785	Pgm3	195.412	181.757	214.69	236.377	281.421	246.952	400.689	243.085	230.297	275.471	204.649	283.059	324.82	261.606	295.39	352.46	107.904	120.69	106.361	106.232	124.495	130.165	125.247	125.66	118.049	123.497	129.224	125.293	141.183	147.197	138.916	154.924
3313	264134	Ttc26	73.7698	71.6014	35.1311	46.1223	80.406	74.8341	58.9249	86.8159	79.1644	90.2129	60.7552	107.314	78.6673	50.0129	94.3607	54.692	72.6275	78.7659	67.9702	72.9096	72.6219	66.404	85.5913	74.2058	73.8978	79.5034	68.8966	80.6517	75.2291	83.4657	77.385	87.7239
7129	11746	Anxa4	926.244	647.167	593.325	728.348	895.952	1085.09	922.175	989.702	1018.34	1024.56	1151.15	987.596	1347.49	1392.67	1284.13	1349.07	577.907	563.431	575.859	588.973	711.003	854.992	835.754	779.161	844.188	868.881	852.124	866.633	1061.11	1187.93	1073.2	1055.67
1483	20338	Sel1l	647.257	429.609	499.642	507.345	534.125	763.308	718.884	746.617	410.216	491.338	537.204	530.347	593.811	680.944	607.19	868.996	598.658	599.637	591.278	644.225	672.617	646.861	676.138	721.756	624.373	667.137	642.006	675.272	761.222	836.922	810.089	977.211
7378	54338	Slc23a2	392.823	267.128	335.697	251.751	384.8	434.038	365.334	438.42	341.846	343.131	390.112	317.275	487.23	546.294	525.138	537.805	315.757	316.969	298.943	321.258	436.077	436.086	419.364	427.383	330.974	332.783	325.631	327.071	481.947	446.768	479.41	515.088
1103	102334	Ankrd10	637.227	545.272	612.843	555.389	959.128	823.175	807.271	716.231	392.224	434.955	518.018	514.794	690.242	715.569	791.809	789.996	575.141	569.147	592.222	605.492	684.375	705.005	704.228	720.356	525.112	532.641	558.028	531.23	638.245	658.344	649.657	637.902
1869	277939	C2cd3	118.208	93.6326	66.3588	73.0269	126.352	89.8009	123.742	91.1567	89.9596	107.933	92.7316	108.869	81.2049	107.72	73.8475	82.0381	158.051	123.866	134.682	148.098	144.552	137.433	132.518	126.01	149.674	137.953	140.535	145.53	142.557	120.993	149.108	164.524
2819	19258	Ptpn4	406.113	96.3865	35.1311	84.5575	91.8925	119.735	111.957	108.52	151.132	106.322	99.1269	99.5372	121.807	126.956	151.798	88.1149	696.878	646.961	679.702	613.181	769.792	644.548	707.863	623.049	769.038	715.53	696.849	712.175	707.291	640.874	742.519	630.288
733	17973	Nck1	171.358	132.187	117.104	140.289	178.042	179.602	215.076	173.632	187.116	165.927	159.882	177.301	149.722	211.593	168.208	240.037	152.172	181.035	165.52	177.432	155.964	150.648	147.389	178.164	179.421	167.177	169.328	169.934	172.786	191.195	169.87	188.358
1649	240354	Malt1	352.194	209.296	124.911	176.802	258.448	239.469	265.162	238.744	201.509	244.863	239.823	289.28	256.303	280.841	336.416	218.768	402.218	386.525	412.856	418.091	438.498	448.64	477.196	443.135	475.325	489.59	477.134	491.945	468.207	503.706	513.383	490.923
3964	50868	Keap1	391.817	402.069	554.291	430.475	580.072	680.99	680.582	651.119	302.264	309.301	287.788	321.941	413.638	488.587	434.88	394.998	332.703	356.988	329.152	318.695	413.945	451.943	444.149	415.132	219.188	241.338	222.114	244.336	317.748	306.688	298.97	300.247
6973	70892	Ttll7	185.549	68.8475	54.6484	86.4793	132.096	112.251	85.4411	112.861	82.7628	127.265	127.906	121.311	185.249	130.803	217.44	170.153	141.105	137.205	129.647	135.282	221.324	219.034	208.525	222.617	250.814	266.163	271.473	270.228	368.588	350.038	376.355	368.109
2612	75339	Mphosph8	126.384	101.894	50.7449	119.149	91.8925	179.602	129.635	164.95	118.747	127.265	92.7316	157.082	144.646	150.039	102.566	164.076	108.25	105.762	119.892	132.433	107.204	122.897	125.247	136.161	142.159	127.582	118.941	145.233	135.344	132.639	120.796	142.344
2426	68310	Zmym1	105.195	79.8631	42.938	142.21	126.352	157.152	150.258	130.224	93.558	117.599	99.1269	149.306	152.259	138.497	127.182	97.2303	79.8902	92.4229	91.8857	92.2762	86.8005	97.7889	103.767	85.4067	88.3016	88.6164	89.1199	97.6153	93.4352	83.7892	95.1269	91.0342
2230	14859	Gsta3	506.973	278.144	288.856	274.812	442.233	306.82	421.313	403.694	838.423	821.581	757.841	695.205	979.534	996.41	914.888	875.073	227.22	208.031	210.204	204.774	254.868	260.33	248.182	245.719	517.911	506.245	528.893	513.373	669.848	636.022	602.471	587.254
6687	72729	Cdc42se2	323.752	90.8787	74.1657	98.0098	183.785	74.8341	126.689	125.883	93.558	114.377	137.499	150.861	134.496	176.969	233.85	167.115	401.18	389.701	413.486	394.452	501.091	497.534	539.324	526.441	503.82	484.248	544.317	490.16	633.436	536.057	608.51	589.571
1261	108755	Lyrm2	57.2808	63.3397	15.6138	42.2787	57.4328	59.8673	58.9249	65.1119	43.1806	59.6049	86.3363	59.1002	53.2907	61.5543	49.2317	54.692	56.0269	65.4265	74.2638	68.068	45.3022	57.8144	44.9437	57.4045	61.999	62.22	64.0978	67.8545	52.5573	59.8494	54.3582	53.9585
9674	18131	Notch3	17.6939	2.7539	31.2277	21.1394	11.4866	59.8673	14.7312	26.0448	28.7871	46.7174	25.5811	20.2185	17.7636	11.5414	24.6158	33.4229	7.60859	6.35209	5.03483	7.97449	8.29965	11.2325	8.26171	8.40066	15.9694	21.0543	8.91199	17.2612	18.5496	11.9699	6.79478	8.93791
476	52830	Pnrc2	344.965	156.972	101.49	147.976	166.555	224.502	206.237	208.358	161.927	149.818	156.684	194.409	162.41	119.261	168.208	112.423	507.701	550.726	530.545	485.02	471.697	439.059	485.788	442.435	578.97	565.008	625.211	597.001	477.138	488.501	488.847	523.033
4487	16551	Kif11	1456.71	1368.69	550.387	1464.38	1464.54	1511.65	1944.52	1614.78	1165.88	1335.47	1135.16	1390.41	1174.93	1096.44	1070.79	1051.3	1668.36	1663.61	1659.61	1729.04	1929.67	1900.94	2232.97	1910.45	1502.38	1545.76	1449.23	1606.19	1158.32	1279.16	1260.05	1322.81
1849	244650	Phlpp2	133.992	104.648	70.2622	84.5575	103.379	119.735	138.473	130.224	140.337	132.097	131.103	118.2	111.657	134.65	118.976	145.845	156.322	127.995	147.269	131.009	158.731	139.415	138.466	129.51	160.947	156.807	142.249	150.292	165.916	147.197	156.28	161.213
9085	414758	Zfp950	22.6675	2.7539	3.90346	19.2176	17.2298	0	26.5162	4.3408	7.19677	14.4985	3.19764	9.33161	15.2259	11.5414	4.10264	15.1922	31.4719	34.6189	32.4117	36.17	37.0026	40.9656	45.9351	47.9537	29.747	32.0527	25.0221	33.0344	33.6642	24.9103	34.3514	29.131
9093	18194	Nsdhl	241.264	225.82	148.331	190.254	212.501	359.204	247.485	308.197	349.043	351.186	345.345	363.933	380.648	615.543	545.651	540.843	89.2281	91.4701	86.8509	96.5483	111.699	131.156	140.119	125.31	141.846	138.581	144.306	143.149	192.023	221.928	212.903	228.082
3876	15510	Hspd1	13292.1	13428	8259.71	14219.1	16713	17309.1	17173.7	17740.8	11511.2	11584.3	10085.4	12885.4	17690	16134.9	14995.1	17161.1	10263.3	10538.8	9972.43	10713.4	16609.3	18153.7	16684.7	18092.6	8555.23	8361.05	8120.88	8751.15	11560.5	13451.9	11356.7	13977.9
8432	17304	Mfge8	1160.25	914.295	1139.81	870.558	1206.09	1384.43	1508.48	1402.08	1845.97	1838.09	2113.64	1858.55	2174.77	2723.78	2830.82	3050.6	310.223	303.312	292.964	323.821	403.224	419.898	460.342	429.484	622.808	634.456	635.151	598.191	886.261	943.357	896.534	945.763
5012	66998	Psmd5	598.079	382.792	413.766	388.196	568.585	598.673	521.485	594.689	485.782	552.554	527.611	636.105	893.254	1169.53	1115.92	1011.8	344.116	380.49	345.83	364.548	460.63	485.641	433.574	481.288	460.295	507.188	506.27	522.897	811.375	897.418	840.288	837.846
5764	20133	Rrm1	2634.88	3332.22	2228.87	3572.55	4468.27	4011.11	4979.15	4097.71	2943.48	2786.93	2762.76	3003.22	3517.19	3408.57	3339.55	3153.91	1804.97	1876.73	1736.39	1888.81	2384.42	2408.71	2556.17	2322.43	1556.55	1439.86	1512.98	1570.18	1715.5	1769.6	1717.95	1814.4
2731	675812	Zfp605	44.2737	24.7851	11.7104	19.2176	17.2298	7.48341	41.2474	26.0448	17.9919	16.1094	6.39528	23.329	15.2259	7.69429	16.4106	9.11534	65.7106	71.7786	78.0399	70.916	41.844	55.5018	65.7632	60.2047	99.8872	78.5607	82.6073	75.89	62.1756	63.4081	68.7028	71.5033
2097	268977	Ltbp1	156.724	66.0936	93.683	63.4181	86.1492	89.8009	94.2798	125.883	305.863	301.246	364.531	323.496	268.991	234.676	352.827	343.344	43.2306	39.383	42.7961	42.4357	41.4982	37.662	40.3171	42.0033	164.078	167.177	174.812	197.016	180.687	165.961	185.347	179.751
2746	26754	Cops5	785.207	903.279	566.001	937.82	1223.32	1144.96	1213.85	1167.67	849.218	894.074	895.34	936.272	1296.74	1069.51	1193.87	1166.76	489.025	503.721	489.952	491.855	616.94	631.664	624.915	634.25	504.759	486.448	506.613	508.314	586.718	578.76	623.987	604.798
8480	22174	Tyro3	23.96	2.7539	15.6138	13.4523	11.4866	7.48341	14.7312	21.704	14.3935	19.3313	25.5811	20.2185	20.3012	19.2357	20.5132	27.346	16.6006	22.5499	18.5659	19.0818	31.1237	25.7687	36.682	32.5525	32.5651	32.367	28.7926	28.8679	53.9314	40.7623	33.9739	34.4275
1062	22327	Vbp1	610.242	514.979	238.111	503.501	539.869	598.673	686.475	638.097	579.34	546.11	511.623	555.231	642.026	492.434	512.83	422.344	666.789	702.541	722.813	765.551	732.098	750.927	777.922	758.159	613.414	622.2	589.905	611.881	633.092	668.049	656.451	664.053
9468	327826	Frs2	215.841	159.726	128.814	161.428	292.907	254.436	209.183	151.928	140.337	162.705	201.451	183.522	215.701	215.44	225.645	197.499	186.411	183.893	185.659	198.793	320.574	251.41	256.443	233.818	207.603	210.543	214.573	217.849	293.016	248.78	290.666	290.316
789	22134	Tgoln1	724.865	688.475	511.353	605.355	867.236	838.142	848.518	941.953	572.143	552.554	514.82	505.462	824.738	711.721	709.756	726.189	730.771	698.095	707.394	702.325	839.648	826.581	866.818	795.612	643.474	603.66	627.61	626.464	826.489	855.685	844.063	857.708
7315	56430	Clip1	1286.56	699.491	765.078	632.259	947.642	898.009	1040.02	998.383	960.768	873.132	847.375	808.74	1065.81	1088.74	1152.84	1081.69	1306.6	1234.53	1277.27	1236.33	1787.19	1759.54	1796.43	1644.78	1581.91	1557.7	1592.5	1504.11	1989.28	1906.45	1973.51	1875.31
2241	217935	Wdr60	65.1953	16.5234	35.1311	42.2787	17.2298	59.8673	55.9786	43.408	79.1644	82.1581	67.1505	79.3187	71.0543	46.1657	45.129	57.7305	71.59	69.5554	66.3968	56.9606	54.9852	52.8589	60.8062	52.8541	109.907	98.3579	99.0602	92.556	98.9314	76.025	86.4447	75.4757
8608	78618	Acap2	469.785	247.851	218.594	288.264	384.8	396.621	347.657	381.99	305.863	344.742	361.333	377.93	489.767	496.281	426.674	401.075	435.765	438.93	448.1	438.312	666.392	646.2	671.842	617.798	522.607	499.017	509.698	504.445	657.138	660.932	680.233	696.495
1408	68263	Pdhb	402.891	512.226	351.311	491.971	746.627	613.639	654.066	655.46	370.633	423.678	521.216	486.799	550.671	550.141	553.856	470.959	270.797	289.338	281.321	272.841	324.032	329.707	329.807	339.877	255.511	243.224	251.592	251.478	280.993	275.631	268.771	271.448
1759	71330	Rcbtb1	69.0383	46.8163	31.2277	42.2787	40.203	22.4502	76.6024	65.1119	57.5741	41.8845	31.9764	35.7712	30.4518	38.4714	36.9237	57.7305	123.813	130.535	129.018	125.313	105.82	106.379	101.123	118.659	69.514	69.7619	68.211	82.1397	59.4275	57.5849	70.2127	67.1998
2539	18195	Nsf	384.379	388.3	366.925	388.196	482.436	553.772	527.378	629.415	392.224	336.687	383.717	387.262	365.422	492.434	451.29	428.421	327.17	322.051	322.859	322.112	409.449	389.174	402.51	375.929	260.521	289.103	268.388	310.702	323.588	332.569	329.547	356.192
5858	108907	Nusap1	587.728	413.085	265.435	436.24	643.248	561.256	571.571	455.784	701.685	597.66	588.366	693.65	578.585	623.237	512.83	513.497	493.175	484.347	501.91	489.862	624.548	631.994	709.185	645.45	717.372	735.642	728.727	743.424	655.764	637.639	603.981	660.412
5298	22289	Kdm6a	277.896	234.082	97.5864	205.628	258.448	194.569	300.517	286.493	215.903	211.034	172.673	241.067	251.228	284.689	192.824	252.191	282.556	268.058	297.055	289.075	377.634	336.315	386.317	337.076	334.419	280.619	314.662	304.155	348.665	345.833	366.163	347.254
3544	67684	Luc7l3	1071.75	795.877	394.249	928.211	930.412	980.326	1137.25	1054.81	662.102	761.976	719.469	866.285	1032.83	861.76	918.991	944.957	1112.24	1311.39	1256.82	1350.82	1289.9	1428.84	1502.64	1623.78	985.408	1149.81	1086.92	1202.63	1155.92	1250.69	1209.09	1317.84
4257	76792	Spring1	195.997	68.8475	175.656	107.619	166.555	224.502	135.527	147.587	100.755	57.994	92.7316	69.9871	111.657	176.969	123.079	161.038	250.046	246.461	261.811	269.993	293.6	303.608	305.022	328.676	186.936	201.115	206.004	209.218	275.153	276.925	284.626	256.22
3401	117599	Helb	149.913	154.218	132.718	128.758	189.528	172.118	209.183	204.017	147.534	172.371	147.092	174.19	180.173	200.051	164.106	200.537	111.016	95.2814	109.193	105.662	119.653	118.272	128.883	122.51	127.442	121.612	132.994	144.637	139.809	154.638	159.677	179.42
10048	11964	Atp6v1a	1320.68	1349.41	1276.43	1427.87	1895.28	1758.6	2059.42	2001.11	1378.18	1438.57	1314.23	1349.97	1540.36	1869.71	1632.85	1683.3	839.712	904.855	913.822	952.382	1261.2	1296.69	1367.48	1263.6	878.632	905.961	943.3	912.465	1053.21	1195.69	1121.14	1155.64
2529	240255	Ythdc2	216.308	101.894	109.297	138.367	137.839	157.152	182.667	190.995	230.297	196.535	179.068	206.851	246.152	203.899	168.208	258.268	215.116	194.056	199.505	201.071	233.428	217.382	242.233	201.966	315.005	289.732	283.813	266.656	287.863	276.601	284.626	288.992
993	67418	Ppil4	549.488	446.132	163.945	393.961	470.949	441.521	503.808	572.985	428.208	431.733	364.531	429.254	350.196	373.173	389.751	394.998	664.023	671.734	686.311	722.831	722.415	700.38	787.506	733.307	635.02	658.338	659.145	657.415	629.314	680.99	651.544	618.702
4212	11747	Anxa5	1126.31	1211.72	983.671	1080.03	1544.94	1840.92	1481.96	1506.26	1245.04	1378.97	1282.25	1345.31	1537.82	1858.17	1554.9	1762.3	650.189	698.095	709.282	678.116	819.59	930.977	917.71	911.471	853.582	819.23	819.218	809.493	907.215	965.032	868.977	943.115
618	22694	Zfp35	238.533	126.679	35.1311	151.819	120.609	194.569	182.667	164.95	147.534	122.432	185.463	119.756	106.581	111.567	143.592	82.0381	319.215	311.57	324.432	332.935	301.554	292.706	289.49	287.022	349.762	386.833	366.42	365.76	372.367	377.86	367.673	353.544
686	226151	Slf2	678.991	253.359	179.559	343.995	344.597	366.687	377.119	464.465	421.011	317.356	351.741	371.709	380.648	411.644	397.956	446.652	906.46	921.371	944.346	979.438	991.808	936.593	969.594	932.473	944.075	883.336	934.388	989.545	1041.87	989.295	1121.52	1134.12
7371	74270	Usp20	44.288	44.0624	50.7449	32.6699	45.9463	44.9004	55.9786	73.7935	50.3774	40.2736	38.3717	29.5501	43.1401	65.4014	57.4369	36.4614	38.043	42.559	52.8657	40.4421	56.7142	52.5285	47.5874	56.3544	33.8176	39.5946	30.5064	32.1416	30.9161	40.1153	33.2189	36.4137
5138	238023	Hexdc	17.3946	8.2617	19.5173	7.68705	5.74328	14.9668	11.785	26.0448	0	11.2766	3.19764	6.22108	10.1506	7.69429	12.3079	12.1538	23.5175	24.1379	20.7687	25.6323	24.2073	15.8577	21.4804	21.3517	27.8682	24.5109	28.1071	21.7254	21.9848	25.2338	26.0467	29.793
4103	22156	Tuft1	123.051	79.8631	74.1657	80.714	97.6358	74.8341	144.366	95.4975	147.534	99.8785	131.103	99.5372	93.8932	111.567	94.3607	142.807	138.684	119.419	130.276	126.168	142.823	142.389	143.754	141.761	151.553	146.437	151.161	135.114	137.748	160.461	118.531	160.551
6059	236266	Alms1	179.852	110.156	93.683	111.462	149.325	149.668	141.42	173.632	100.755	83.7691	89.534	110.424	98.9685	103.873	123.079	78.9996	256.271	232.804	223.735	246.355	345.127	279.822	290.151	294.023	211.986	194.516	181.325	202.671	239.771	210.929	220.075	227.089
3992	67902	Sumf2	108.843	104.648	187.366	109.54	126.352	194.569	191.506	199.677	79.1644	66.0487	121.51	91.7609	134.496	157.733	98.4633	124.576	72.9733	89.5645	79.2986	84.3018	99.5958	90.1905	96.4967	99.7578	62.6252	71.3331	69.9249	72.0211	100.649	102.229	95.1269	100.634
8976	17135	Mafk	174.582	115.664	121.007	69.1834	166.555	187.085	97.2261	143.246	97.1563	101.489	137.499	91.7609	106.581	153.886	102.566	118.499	191.598	166.425	178.737	167.464	253.139	246.124	231.989	238.019	221.38	229.083	203.262	210.706	262.1	261.396	266.129	275.089
9255	27054	Sec23b	856.006	842.694	780.691	797.531	1154.4	987.81	1122.52	1306.58	1061.52	1087.39	1125.57	1191.34	1514.98	1646.58	1452.33	1561.76	370.054	377.949	369.431	389.896	533.944	534.535	571.38	541.492	542.647	536.098	556.314	551.169	746.108	750.221	754.976	776.274
6466	68031	Rnf146	147.219	165.234	121.007	207.55	189.528	224.502	309.356	221.381	183.518	173.982	211.044	188.188	213.163	223.134	188.721	173.191	94.7616	83.2124	82.4454	97.6875	107.895	117.941	114.012	123.21	90.8066	87.0452	102.831	86.3062	106.145	89.9359	94.372	91.6963
4336	67179	Ccdc25	181.088	132.187	39.0346	90.3228	103.379	82.3175	156.151	147.587	136.739	119.21	99.1269	116.645	192.862	119.261	106.669	164.076	205.778	247.414	239.155	221.862	260.056	267.268	269.001	268.821	210.108	205.2	191.265	211.301	227.061	255.897	244.612	283.365
3729	22151	Tubb2a	116.363	96.3865	66.3588	92.2445	97.6358	127.218	144.366	108.52	125.943	86.991	140.696	108.869	195.399	157.733	188.721	161.038	75.0484	68.9202	78.6692	63.7959	133.14	133.138	121.943	130.21	92.0591	81.3888	78.8369	67.2593	154.924	166.931	142.69	120.165
1760	12177	Bnip3l	315.406	187.265	230.304	184.489	333.11	217.019	282.839	273.47	208.706	298.025	227.033	278.393	289.293	384.714	373.34	328.152	307.802	297.913	287.3	313.568	335.79	349.529	339.06	334.276	366.671	356.665	341.741	370.224	408.436	421.534	434.488	416.44
1367	67966	Zcchc10	138.897	134.941	121.007	153.741	195.272	202.052	229.807	160.609	187.116	138.541	182.266	188.188	223.314	173.121	139.49	170.153	101.333	97.8222	96.2912	105.662	104.783	102.414	97.8186	107.808	116.483	107.471	110.029	111.305	106.489	108.053	113.246	119.172
448	12387	Ctnnb1	3407.22	3648.92	3275	3664.8	4944.97	5148.58	5129.41	5096.09	3461.64	3432.92	3411.88	3471.36	4121.15	4501.16	4389.82	4183.94	2536.08	2615.16	2557.38	2621.9	3147.99	3227.37	3374.74	3190.5	2288.95	2321.31	2303.07	2268.96	2815.42	2814.86	2854.56	2803.85
4924	110350	Dync2h1	63.1527	22.0312	35.1311	40.357	51.6895	14.9668	55.9786	47.7488	14.3935	14.4985	6.39528	18.6632	22.8389	19.2357	24.6158	27.346	123.121	106.08	123.668	122.75	131.757	117.281	130.865	124.26	69.8271	75.4182	90.1483	80.0565	64.5802	56.2908	66.8153	58.924
4068	18786	Plaa	1297.84	911.541	526.967	999.316	1171.63	1047.68	1272.78	1228.45	856.415	836.08	850.573	945.604	1334.81	1208	1337.46	1102.96	1233.28	1259.94	1232.9	1279.62	1964.6	2066.45	1992.06	2050.46	1152.3	1146.36	1110.23	1168.41	1664.31	1785.13	1740.22	1756.46
3050	545622	Ptpn3	368.135	316.699	281.049	280.577	442.233	478.938	409.528	368.968	359.838	317.356	361.333	278.393	350.196	350.09	361.032	370.69	352.762	329.038	369.116	337.492	422.59	411.639	455.055	376.279	367.61	367.35	363.335	380.343	410.153	359.744	426.561	356.192
2170	232210	Hmces	300.825	316.699	355.215	338.23	505.409	478.938	447.829	499.192	320.256	317.356	303.776	320.385	474.541	373.173	402.059	398.036	197.132	207.713	199.505	198.223	229.624	238.195	242.233	234.518	191.633	200.173	227.256	186.005	249.39	239.398	224.605	208.882
9147	60595	Actn4	3310.44	4373.19	4617.79	4064.53	6036.19	6488.11	6219.52	6046.73	4890.2	4683.01	4598.21	4193.01	5793.46	5805.34	5423.69	6058.66	1245.04	1218.97	1107.98	1169.97	1787.88	1794.56	1641.44	1626.93	1446.33	1377.01	1262.42	1357.09	1608.32	1540.88	1641.32	1505.87
3043	72129	Pex13	238.786	212.05	140.524	196.02	183.785	231.986	318.194	286.493	194.313	217.477	274.997	217.738	223.314	223.134	246.158	236.999	225.145	240.744	219.33	227.558	277.347	288.081	262.061	250.27	211.986	236.939	225.542	241.955	270.687	279.837	264.619	277.075
2703	12368	Casp6	127.555	132.187	105.393	117.227	206.758	164.635	150.258	173.632	223.1	173.982	185.463	174.19	190.324	203.899	196.927	227.883	76.4318	65.7441	65.7675	76.8969	75.0426	80.9402	81.2952	77.356	90.8066	85.1597	77.4658	87.4967	103.054	90.2594	93.9945	100.634
2494	216760	Mfap3	264.031	159.726	218.594	211.394	229.731	276.886	315.248	273.47	151.132	170.76	217.44	209.961	228.389	200.051	262.569	331.191	241.054	261.071	257.72	258.601	271.122	277.179	304.031	312.224	265.531	257.993	283.813	289.275	342.138	350.685	389.19	366.785
146	72981	Thap12	1380.29	231.328	171.752	332.465	413.516	441.521	350.603	312.537	291.469	307.69	364.531	348.38	375.573	315.466	299.493	206.614	3065.57	3133.17	3305.05	3248.47	2328.4	2170.19	2311.96	2284.63	2226.01	2276.37	2284.21	2345.15	1809.28	1658.64	1886.31	1692.57
1591	218756	Slc4a7	394.116	289.16	171.752	353.604	447.976	366.687	424.259	368.968	442.601	336.687	383.717	468.136	421.251	334.701	332.314	361.575	413.285	386.525	400.584	408.123	466.855	387.852	459.02	397.281	470.002	439.311	465.48	457.721	385.077	351.332	415.614	410.151
8439	26357	Abcg2	69.6369	74.3553	35.1311	57.6528	74.6627	82.3175	91.3336	69.4527	82.7628	98.2676	102.325	66.8766	101.506	126.956	118.976	60.7689	40.118	46.0527	43.7401	41.8661	57.4059	50.5463	65.1022	50.4039	67.3221	61.2773	58.2707	56.5455	65.6108	69.2312	69.0803	72.8274
4501	20419	Shcbp1	380.485	429.609	121.007	370.9	505.409	456.488	471.399	377.649	424.609	410.791	348.543	527.236	527.832	446.269	381.545	440.575	315.065	317.287	307.439	327.808	356.539	360.432	396.231	363.678	354.146	354.466	333.514	381.235	342.825	371.714	323.885	348.909
6914	100678	Psph	598.07	784.862	971.961	834.044	1108.45	1302.11	1163.77	1310.92	521.766	531.611	581.971	539.678	576.047	650.167	689.243	689.727	413.977	392.242	432.366	405.845	535.673	554.027	545.603	601.347	276.177	265.535	292.382	274.394	323.588	339.686	304.255	326.73
4652	229227	4932438A13Rik	202.61	115.664	70.2622	126.836	126.352	149.668	194.452	130.224	115.148	112.766	95.9292	102.648	88.8179	65.4014	131.284	94.1918	310.915	277.269	303.034	313.568	408.066	329.047	368.142	328.676	242.36	242.595	234.797	260.407	222.252	223.222	255.937	240.992
7617	17698	Msn	3938.44	4618.29	4360.16	5013.88	6283.15	7199.04	7032.69	6172.61	4559.15	4789.34	4537.45	5177.49	5983.79	6024.63	5797.03	5885.47	2177.1	2059.03	2060.5	2151.4	2992.37	2941.27	2945.46	2838.72	2114.85	2169.22	2103.23	2206.46	2486.34	2548.94	2501.99	2360.6
525	99712	Cept1	187.63	198.281	132.718	247.907	235.475	254.436	324.087	308.197	244.69	204.59	252.614	261.285	190.324	215.44	188.721	191.422	156.322	167.695	156.709	162.053	144.552	157.586	152.015	136.511	132.139	154.293	146.705	155.946	129.847	144.933	128.346	140.689
3947	26430	Parg	277.412	156.972	101.49	178.724	264.191	164.635	226.861	204.017	212.305	151.429	163.08	164.859	177.636	196.204	164.106	167.115	369.363	353.176	354.326	385.054	451.985	415.933	433.905	460.986	316.257	304.501	296.152	335.404	335.955	355.862	371.826	365.461
6566	12462	Cct3	4078.23	4687.14	3848.81	4800.56	6340.58	6727.58	6349.16	6129.2	4336.05	4215.84	4380.77	4524.28	6103.06	5709.16	5899.59	5669.74	2522.59	2662.8	2635.42	2658.64	3528.04	3683.27	3647.05	3542.28	2378.19	2311.25	2438.8	2419.55	3053.13	3178.49	2962.9	3081.26
8914	68948	Fam216a	178.748	253.359	199.076	190.254	333.11	246.952	265.162	364.627	183.518	182.037	230.23	175.745	289.293	284.689	311.8	249.153	85.7696	96.5518	110.766	99.3963	137.636	132.478	140.779	130.56	78.5946	88.9307	88.0916	82.1397	131.565	137.815	124.571	116.524
4147	67588	Rnf41	146.631	60.5858	50.7449	36.5135	57.4328	97.2843	55.9786	69.4527	75.566	70.8815	95.9292	76.2082	58.366	111.567	110.771	103.307	172.577	186.116	180.625	166.04	183.975	196.239	167.878	196.365	203.219	223.741	241.652	204.754	249.046	265.279	283.493	293.958
5599	269181	Mgat4a	51.1595	11.0156	7.80691	15.3741	28.7164	7.48341	17.6775	13.0224	17.9919	48.3283	15.9882	27.9948	15.2259	34.6243	32.8211	15.1922	83.3487	73.3667	70.4876	71.4856	78.155	68.3862	67.4155	68.9554	103.018	94.2728	87.4061	71.1282	81.0688	84.4362	83.0473	90.7032
3680	230249	Ecpas	656.541	732.538	425.477	728.348	1022.3	875.559	916.282	881.182	471.388	476.839	415.693	519.46	525.294	500.129	480.009	492.228	746.334	678.086	741.694	736.216	945.814	909.834	941.504	875.068	466.871	483.619	462.053	496.112	623.817	583.613	605.868	593.543
7901	72194	Fbxl20	15.8224	2.7539	11.7104	21.1394	28.7164	14.9668	17.6775	13.0224	3.59838	11.2766	12.7906	12.4422	7.61296	7.69429	16.4106	9.11534	16.6006	20.6443	15.1045	18.5122	19.3658	22.1347	15.8625	24.8519	22.232	22.9397	19.5378	19.6421	14.4275	15.205	13.967	18.5379
8790	68897	Disp1	32.9132	33.0468	19.5173	19.2176	22.9731	37.417	29.4624	43.408	0	19.3313	25.5811	17.108	38.0648	26.93	36.9237	45.5767	42.1931	35.2541	31.4677	30.1891	39.4233	42.2871	44.6132	50.754	31.3126	29.2246	28.4498	37.7962	43.626	43.6739	37.7488	37.7378
5039	16439	Itpr2	92.9699	71.6014	93.683	44.2005	97.6358	52.3838	106.065	86.8159	82.7628	90.2129	99.1269	57.545	81.2049	61.5543	53.3343	78.9996	128.654	112.432	101.641	118.763	124.149	125.54	127.561	141.061	105.837	98.3579	86.3778	87.4967	96.1833	105.464	85.3122	80.1101
7317	218503	Fcho2	138.846	129.433	93.683	161.428	212.501	194.569	206.237	147.587	165.526	172.371	131.103	208.406	157.335	173.121	184.619	215.73	102.37	106.08	83.0747	91.7066	149.394	103.075	121.943	121.459	102.392	105.9	91.1766	109.222	115.076	109.994	118.531	119.172
361	22218	Sumo1	659.022	443.378	163.945	451.614	557.098	508.872	577.464	473.147	431.806	446.231	390.112	479.023	527.832	503.976	570.267	556.036	852.854	862.932	894.312	853.27	788.812	829.224	827.493	845.316	787.512	746.955	765.746	762.173	873.894	859.891	882.189	916.301
5717	11977	Atp7a	79.7531	63.3397	50.7449	88.401	68.9194	67.3507	120.796	112.861	100.755	93.4347	108.72	116.645	119.27	119.261	94.3607	94.1918	51.5309	55.8984	44.3695	57.8151	61.9015	55.8322	65.1022	60.5547	63.8777	75.104	64.0978	82.1397	73.5115	76.672	70.2127	94.6756
1623	544971	Bdp1	517.584	159.726	109.297	182.567	183.785	134.701	253.377	269.129	219.501	199.757	166.277	175.745	218.238	173.121	225.645	221.807	793.369	824.501	819.419	843.018	945.814	826.25	904.492	833.765	821.33	843.741	779.114	903.239	752.978	743.751	751.956	765.681
6939	66092	Ghitm	1394.65	1544.94	1288.14	1721.9	2147.99	2110.32	2189.06	2283.26	1241.44	1301.64	1346.21	1320.42	1849.95	1785.07	1879.01	1692.41	996.726	993.785	1033.71	1031.27	1403.68	1575.19	1460.67	1559.02	811.623	821.116	775.686	756.519	1020.92	1118.7	1059.99	1113.93
1860	70356	St13	2448.51	2068.18	1577	2113.94	2963.53	2896.08	2575.02	2691.29	1921.54	1937.97	1797.07	2034.29	2974.13	3093.1	2929.28	3044.52	1949.18	2005.67	1924.25	2002.45	3057.73	3313.26	3195.3	3219.2	1894.73	1824.81	1789.94	1853.2	2666.68	2976.62	2712.25	2901.51
3863	109359	Abraxas2	324.142	247.851	167.849	221.003	298.651	269.403	324.087	316.878	259.084	236.809	182.266	245.733	309.594	273.147	242.056	233.96	350.341	330.944	338.592	357.428	400.112	436.086	438.201	424.933	367.297	363.579	367.106	363.379	440.726	406.006	423.164	412.137
5238	60533	Cd274	44.9166	11.0156	23.4207	38.4352	40.203	29.9336	35.3549	39.0672	35.9838	33.8298	44.767	41.9923	35.5272	38.4714	49.2317	27.346	44.2682	47.9583	44.0548	53.543	51.527	48.8945	41.639	54.9543	66.0696	50.2788	67.1827	62.4976	58.397	62.114	58.5106	55.9447
2104	75540	Fpgt	184.154	123.926	74.1657	149.897	143.582	217.019	185.613	156.269	136.739	177.204	172.673	239.511	208.088	153.886	155.9	200.537	164.276	167.06	184.086	197.653	190.892	159.898	196.298	191.815	211.986	231.597	202.919	199.397	226.374	225.487	225.36	238.675
2248	67075	Magt1	707.14	597.596	382.539	530.406	735.14	710.924	745.4	703.209	597.332	567.052	422.089	692.095	827.275	711.721	750.783	808.227	698.607	746.371	651.696	753.304	811.29	833.519	776.27	819.414	667.898	692.591	618.355	726.163	736.146	842.745	824.056	941.129
1682	218035	Vps41	265.875	145.957	58.5519	209.472	212.501	231.986	206.237	234.403	226.698	206.201	185.463	214.627	276.604	250.064	225.645	224.845	299.848	292.196	282.265	285.373	308.816	312.528	316.258	317.825	335.045	316.757	309.863	311.893	371.68	347.127	366.541	358.84
7916	17920	Myo6	140.592	173.496	81.9726	190.254	183.785	217.019	250.431	225.721	176.321	143.374	143.894	178.856	131.958	119.261	118.976	148.884	119.662	106.715	132.164	111.358	151.123	142.389	167.547	164.163	99.5741	107.157	102.488	109.817	83.1299	98.0237	94.7494	84.0825
5001	217026	Heatr6	337.795	355.253	398.153	313.247	482.436	553.772	477.292	486.169	302.264	354.408	326.159	377.93	431.401	419.339	475.906	470.959	245.204	231.851	217.442	235.247	291.871	309.885	298.413	286.322	216.996	235.996	218.001	260.109	300.229	306.041	275.566	317.792
5528	407243	Tmem189	206.62	11.0156	11.7104	13.4523	11.4866	14.9668	17.6775	21.704	7.19677	19.3313	9.59292	21.7738	22.8389	19.2357	16.4106	24.3076	336.507	346.824	332.928	356.574	343.398	339.949	292.134	329.726	415.518	425.799	407.21	408.913	474.39	458.414	442.038	452.192
3266	12406	Serpinh1	913.052	594.843	858.76	538.093	993.588	1062.64	845.572	842.114	1137.09	1027.78	1173.53	906.722	1512.44	1888.95	1969.27	2452.03	353.108	340.79	325.061	303.031	557.114	616.467	531.723	593.296	624.06	603.974	597.446	543.729	1090.31	1199.9	1053.95	1167.22
5193	93887	Pcdhb16	25.3273	24.7851	11.7104	42.2787	34.4597	29.9336	41.2474	52.0896	14.3935	14.4985	25.5811	23.329	22.8389	19.2357	20.5132	18.2307	18.6756	32.3957	26.4329	27.9107	22.4782	30.3939	27.7593	27.6522	22.5451	21.6827	16.4529	23.2134	26.7939	20.3812	23.4042	21.8482
5329	66660	Sltm	825.159	570.057	323.987	516.954	706.424	628.606	662.905	750.958	582.938	449.453	418.891	542.789	766.372	669.403	611.293	562.113	1013.33	1006.17	980.848	1005.92	1293.02	1314.53	1320.55	1317.15	888.965	837.142	852.809	874.967	1049.77	1000.62	1008.65	1052.36
8661	13383	Dlg1	878.724	476.425	316.18	513.11	597.301	710.924	642.281	620.734	665.701	708.815	636.331	670.321	677.554	796.359	816.425	762.65	870.838	794.011	865.676	849.853	1090.02	1176.11	1238.93	1157.19	1104.08	1160.18	1082.81	1178.53	1168.28	1280.78	1274.02	1338.04
5812	268741	Tox4	430.207	374.53	366.925	297.873	493.922	434.038	471.399	512.214	345.445	375.35	335.752	359.267	479.617	503.976	504.624	598.574	390.459	371.28	396.493	383.345	498.67	531.232	517.513	470.437	335.984	358.865	335.914	372.01	474.39	480.413	486.582	479.337
8772	74486	Osbpl10	39.6673	41.3085	62.4553	36.5135	45.9463	37.417	64.8174	82.4751	35.9838	40.2736	35.1741	45.1028	45.6778	50.0129	65.6422	78.9996	23.1716	20.0091	22.3421	23.6387	26.628	34.0279	39.3257	32.5525	25.6763	22.6255	22.9655	24.1062	38.4733	29.4395	38.5038	38.3999
6040	320487	Heatr5a	247.32	212.05	191.269	157.584	269.934	217.019	235.7	312.537	208.706	167.538	204.649	188.188	225.851	234.676	283.082	285.614	214.424	224.864	231.917	230.406	273.542	302.947	284.533	289.473	226.39	240.081	210.46	237.193	289.58	318.011	327.282	371.42
4157	16564	Kif21a	417.135	220.312	148.331	215.237	327.367	239.469	274.001	295.174	233.895	273.86	211.044	255.064	317.207	396.256	315.903	288.652	474.154	431.307	455.338	459.957	772.213	722.845	747.189	728.057	458.417	468.85	429.832	466.054	537.94	612.729	588.126	566.398
9349	13427	Dync1i2	1301.51	1007.93	913.409	1185.73	1389.87	1541.58	1549.72	1475.87	1835.18	1723.71	1733.12	1676.58	2281.35	1969.74	2190.81	1926.38	680.969	703.494	712.114	696.629	929.906	931.968	1062.46	988.477	1060.24	1018.46	1035.85	1070.79	1252.79	1298.57	1230.99	1272.16
8814	80877	Lrba	451.991	349.745	269.339	411.257	413.516	568.739	571.571	442.761	439.003	451.064	383.717	465.025	489.767	419.339	426.674	382.844	418.473	380.173	412.227	405.275	561.264	525.285	623.263	517.34	446.205	436.797	435.317	439.567	476.451	466.179	489.979	493.571
8148	217830	Dglucy	278.328	291.913	242.014	309.404	361.827	516.355	385.958	403.694	255.485	231.976	211.044	220.848	360.347	353.937	381.545	349.421	219.612	206.761	212.722	203.634	314.349	334.663	298.743	294.373	177.229	150.208	151.161	157.732	272.748	244.897	256.692	256.882
4192	54387	Mcm3ap	518.394	517.733	749.464	549.624	867.236	823.175	801.379	863.818	446.199	473.617	492.437	572.339	680.091	615.543	557.959	659.343	373.513	360.799	349.291	373.092	472.042	455.908	484.466	451.185	347.257	333.411	337.285	365.76	428.016	412.476	409.197	446.564
8413	56417	Adar	182.629	209.296	234.207	209.472	304.394	254.436	309.356	334.241	158.329	170.76	140.696	166.414	236.002	238.523	258.466	236.999	125.196	132.441	134.996	123.035	159.422	185.667	165.895	186.565	100.513	109.042	103.859	113.686	115.42	142.668	131.366	170.151
5393	19419	Rasgrp1	30.1267	8.2617	15.6138	13.4523	11.4866	0	20.6237	26.0448	50.3774	48.3283	31.9764	37.3265	15.2259	50.0129	12.3079	33.4229	13.488	15.245	16.3632	15.949	13.1411	12.2236	16.5234	14.3511	65.4434	66.6194	61.3557	69.9378	39.1603	45.9385	43.4111	50.3171
5019	68121	Cep70	43.4874	24.7851	11.7104	38.4352	51.6895	29.9336	35.3549	39.0672	32.3854	32.2189	28.7788	24.8843	17.7636	38.4714	45.129	30.3845	55.3352	55.8984	58.2152	63.2263	56.3684	62.7699	60.8062	59.5046	53.5446	49.6503	48.3304	66.6641	41.5649	45.2915	42.2786	47.6688
1988	72198	Mtrex	918.31	1024.45	679.201	1087.72	1217.58	1279.66	1423.04	1428.12	989.555	890.852	866.561	1031.14	1007.45	969.48	951.812	984.457	827.953	794.647	853.404	815.107	979.012	946.174	1047.58	992.677	664.454	659.909	638.921	676.165	703.856	686.813	666.266	683.584
4441	105787	Prkaa1	623.607	473.671	386.442	490.049	637.504	463.971	695.314	716.231	698.086	613.77	588.366	577.005	751.146	646.32	623.601	595.536	542.631	520.871	544.706	535.145	691.637	682.21	725.378	657.701	650.05	636.97	636.522	659.499	744.734	683.901	739.876	722.977
4188	18223	Numbl	104.282	88.1248	121.007	76.8705	166.555	164.635	109.011	95.4975	93.558	119.21	111.917	129.087	154.797	157.733	123.079	182.307	57.4103	52.0871	60.1033	48.4165	88.5296	97.4586	104.428	87.5068	71.7059	69.1334	82.9501	72.0211	117.481	98.3472	126.836	104.938
8237	50496	E2f6	259.028	112.91	74.1657	151.819	155.069	239.469	147.312	177.973	107.951	146.596	143.894	129.087	248.69	196.204	229.748	255.23	238.287	271.552	271.566	287.082	389.738	397.433	398.545	411.632	288.702	276.219	292.039	277.668	455.84	428.651	408.064	420.744
1616	15251	Hif1a	1654.05	1498.12	936.83	1662.32	1952.72	1863.37	2021.12	2005.45	1511.32	1573.89	1499.69	1587.93	1801.73	1665.81	1612.34	1519.22	1561.84	1585.48	1651.11	1612.27	1791.34	1818.02	1941.17	1860.4	1664.27	1678.68	1586.68	1620.77	1527.6	1580.35	1603.57	1480.05
10130	67880	Dcxr	304.914	305.683	487.932	340.152	608.788	531.322	548.001	412.376	309.461	283.526	348.543	253.509	459.315	450.116	434.88	483.113	172.231	177.223	185.659	165.755	220.978	272.884	244.877	255.17	149.361	163.72	143.62	125.293	220.191	260.749	214.791	223.117
4837	214627	Tent4b	514.711	308.437	312.277	340.152	413.516	538.805	453.722	447.102	392.224	364.073	367.729	345.27	512.606	411.644	443.085	446.652	514.272	511.343	532.748	530.873	685.067	657.432	689.357	651.051	588.051	578.521	547.745	602.358	700.421	661.255	683.63	724.633
532	72053	Tmub2	177.58	170.742	218.594	188.333	246.961	239.469	288.732	273.47	266.28	201.368	201.451	189.743	281.68	265.453	283.082	306.883	97.1825	101.316	103.529	105.377	95.1001	97.1282	91.8702	94.5074	131.826	122.869	126.139	135.114	137.405	158.197	138.538	146.648
2036	13167	Dbi	1478.51	1522.91	698.719	1495.13	1636.84	1818.47	1850.24	1784.07	1874.76	1867.08	1893	1970.53	2596.02	2631.45	2235.94	2230.22	897.468	875.636	870.711	896.276	920.569	999.694	964.637	979.726	1189.25	1186.27	1199.01	1074.96	1346.91	1498.18	1445.02	1384.05
171	63958	Ube4b	506.758	487.44	593.325	476.597	706.424	763.308	680.582	755.299	421.011	460.73	444.472	471.247	730.844	830.983	754.885	820.381	291.893	282.986	274.084	275.12	639.073	662.058	584.268	647.201	234.218	263.021	223.143	249.693	420.802	410.858	418.257	435.309
2477	55978	Ift20	188.281	85.3709	81.9726	98.0098	132.096	104.768	132.581	130.224	100.755	77.3253	89.534	110.424	126.883	134.65	106.669	124.576	257.309	274.093	230.029	246.355	249.681	278.831	256.113	274.071	236.723	236.939	220.743	231.836	272.405	304.1	301.613	330.041
2489	668923	Zfp442	34.3479	11.0156	11.7104	15.3741	17.2298	14.9668	20.6237	17.3632	25.1887	37.0517	35.1741	41.9923	22.8389	19.2357	8.20528	18.2307	42.1931	58.1216	42.4814	50.1254	32.1611	30.7242	33.3773	31.8525	58.5546	58.7634	50.387	68.4498	45.6871	48.5266	44.5436	52.6343
2838	67118	Bfar	181.068	101.894	121.007	134.523	137.839	194.569	185.613	160.609	133.14	111.155	147.092	152.416	152.259	157.733	172.311	170.153	173.268	215.971	198.561	215.311	205.07	217.382	230.997	232.068	180.674	193.259	185.438	204.159	221.222	224.193	230.645	252.579
6590	17755	Map1b	1501.21	1217.22	999.285	1074.26	1700.01	1526.62	1496.69	1514.94	1734.42	1668.94	1515.68	1479.06	1948.92	1831.24	1944.65	2029.68	1052.06	927.723	902.179	937.572	1626.04	1354.84	1435.88	1309.45	1619.49	1547.64	1436.89	1466.91	1875.57	1743.4	1908.2	1712.11
9116	19647	Rbbp6	820.447	826.17	581.615	591.902	982.101	898.009	916.282	972.338	705.283	526.779	617.145	558.342	865.34	715.569	890.272	805.188	769.851	717.786	775.993	736.216	1170.94	917.102	1042.3	1012.28	807.865	755.439	738.324	797.291	1009.92	855.685	991.661	882.867
4790	104263	Kdm3a	440.66	319.452	226.4	413.179	453.719	389.137	530.324	464.465	528.962	515.502	524.413	569.228	504.993	492.434	414.366	425.383	340.657	304.583	314.048	342.333	415.328	375.628	446.132	384.68	518.85	518.5	525.122	550.277	444.504	454.209	516.026	437.626
6729	76943	Psapl1	23.1355	41.3085	23.4207	15.3741	11.4866	0	47.1399	60.7711	25.1887	25.7751	31.9764	31.1054	35.5272	61.5543	49.2317	78.9996	9.68366	6.9873	7.23757	7.68969	6.22473	9.91104	8.59217	9.45074	9.70691	12.8839	10.6258	9.52344	19.5802	20.3812	11.3246	18.5379
3572	68118	Atg101	276.897	247.851	331.794	311.325	419.26	501.388	368.281	429.739	291.469	328.633	358.136	332.828	380.648	469.351	525.138	364.614	150.788	143.875	159.227	142.971	184.321	178.729	184.732	178.864	186.31	195.145	199.834	172.612	216.756	220.311	207.618	201.268
897	100019	Mdn1	621.066	586.581	382.539	515.032	700.681	680.99	701.206	750.958	359.838	426.9	377.322	458.804	406.025	346.243	336.416	319.037	853.546	858.485	785.434	891.434	984.2	858.627	931.59	876.118	675.413	661.166	655.032	726.758	542.062	503.382	523.576	577.654
6640	270757	Bpifc	14.0817	16.5234	3.90346	17.2959	17.2298	14.9668	23.57	17.3632	17.9919	33.8298	25.5811	41.9923	25.3765	15.3886	28.7185	24.3076	2.07507	5.71688	4.40548	5.98087	6.91637	3.30368	3.63515	4.90038	11.2725	11.9412	9.25476	14.8804	7.90077	6.47021	7.54976	6.28964
6535	66526	Tceanc2	103.006	85.3709	58.5519	103.775	155.069	89.8009	106.065	134.565	104.353	88.6019	111.917	127.532	157.335	130.803	94.3607	115.461	84.3862	91.4701	88.1096	86.0106	92.3336	109.682	116.325	111.309	83.9178	88.6164	90.1483	85.1158	101.336	100.288	101.922	98.648
1708	26429	Orc5	185.066	179.004	74.1657	236.377	160.812	209.535	250.431	329.901	179.919	202.979	150.289	259.73	172.56	180.816	139.49	191.422	184.681	201.997	206.428	225.279	177.059	184.015	198.942	209.316	145.604	159.321	161.101	185.41	142.557	151.726	135.896	150.289
9126	23997	Psmd13	1552.49	1627.56	1272.53	1842.97	2435.15	2147.74	2292.18	2209.47	1734.42	1841.31	1873.82	1920.76	2804.11	2977.69	2646.2	2673.83	807.894	790.2	809.979	814.537	1121.14	1141.09	1113.02	1110.64	842.622	844.056	842.869	854.134	1155.57	1238.72	1142.66	1198.34
232	67236	Cinp	399.142	220.312	175.656	253.672	338.854	389.137	294.624	286.493	197.911	259.362	287.788	287.725	317.207	265.453	299.493	300.806	538.481	546.28	538.727	563.91	480.342	495.882	429.609	448.035	536.072	510.958	509.698	538.67	519.733	503.059	505.834	533.626
5352	70579	Zc3h11a	746.604	267.128	222.497	297.873	338.854	389.137	412.474	360.286	266.28	322.189	348.543	281.504	299.443	338.549	303.595	315.998	1026.81	906.443	956.303	948.395	1422.35	1096.16	1169.2	1147.04	1130.7	1107.39	1092.06	1198.76	1290.57	1241.31	1357.82	1289.04
4748	72656	Ints8	363.474	305.683	226.4	253.672	390.543	404.104	377.119	329.901	302.264	298.025	278.195	374.82	421.251	434.727	397.956	425.383	302.96	338.884	304.293	330.372	392.158	407.344	387.309	399.381	322.207	365.464	324.26	366.355	421.146	458.414	421.276	505.819
8474	19155	Npepps	1027.3	933.572	831.436	1116.54	1223.32	1496.68	1425.98	1367.35	1651.66	1738.21	1595.62	1760.56	2101.18	2139.01	1997.98	2020.57	381.813	369.692	357.473	350.593	589.621	510.419	521.148	488.988	547.031	567.836	527.522	561.288	666.413	631.169	697.975	677.626
4978	100043772	Zfp850	69.2036	11.0156	0	23.0611	11.4866	14.9668	23.57	21.704	14.3935	28.997	35.1741	20.2185	38.0648	15.3886	12.3079	6.07689	122.429	112.114	135.626	118.193	114.812	109.021	108.063	115.859	120.24	131.982	130.595	119.936	95.1528	117.434	112.491	104.938
8735	330286	D630045J12Rik	127.359	107.402	167.849	103.775	212.501	217.019	150.258	121.542	97.1563	103.1	127.906	164.859	152.259	230.829	209.235	194.461	78.161	60.0273	64.5088	74.6184	118.616	98.4497	90.2178	96.9576	87.0491	77.6179	86.7206	93.7464	141.527	121.963	160.432	137.379
10010	29876	Clic4	1202.08	820.662	839.243	976.255	1068.25	1287.15	1384.73	1215.42	752.062	866.688	777.027	841.401	1116.57	1196.46	1177.46	1136.38	1222.56	1152.9	1212.77	1152.31	1657.85	1657.13	1704.56	1680.13	1142.91	1138.82	1210.32	1113.65	1431.07	1454.83	1529.96	1346.98
7496	16438	Itpr1	104.571	74.3553	81.9726	90.3228	109.122	112.251	120.796	112.861	68.3693	93.4347	89.534	79.3187	93.8932	65.4014	102.566	66.8458	125.542	122.913	111.396	115.63	164.264	127.522	143.423	162.413	91.7459	95.844	88.0916	89.8775	129.16	96.0826	104.187	112.551
4259	53861	Zranb2	873.852	578.319	382.539	534.25	648.991	793.241	648.174	798.707	399.42	497.782	396.508	514.794	690.242	553.989	631.806	577.305	1074.89	1160.21	1094.76	1149.75	1322.76	1430.16	1367.81	1451.56	862.975	889.307	928.219	1000.85	1091.34	1189.22	1135.86	1293.68
3065	226016	Abhd17b	431.509	341.484	308.373	417.022	459.463	613.639	492.023	529.577	341.846	288.359	326.159	311.054	484.692	469.351	381.545	428.421	389.422	411.616	440.548	430.907	533.598	527.928	497.685	478.487	422.407	382.747	394.87	388.676	475.077	463.267	485.072	461.461
5500	24058	Sigirr	13.1436	19.2773	7.80691	3.84352	22.9731	0	14.7312	13.0224	28.7871	33.8298	22.3835	15.5527	12.6883	26.93	57.4369	21.2691	5.87937	6.03449	4.40548	3.98724	3.804	5.28589	3.30468	3.8503	11.8988	9.11304	6.51261	7.7378	15.458	6.47021	7.54976	5.62757
1167	66624	Spcs2	1051.85	911.541	710.429	945.507	1200.35	1159.93	1408.3	1072.18	1032.74	923.071	872.956	1007.81	1367.8	1304.18	1214.38	1403.76	887.439	960.119	860.327	900.263	991.116	1015.55	1033.04	1061.63	901.49	893.077	901.14	951.452	1091.68	1195.69	1137.37	1291.03
154	319162	H2aw	2366.69	5091.96	6311.89	4937	8080.8	7445.99	7315.53	7800.41	3224.15	3236.39	4128.15	3546.01	3179.68	2604.52	3257.49	2986.79	18.6756	17.1506	16.9926	15.0946	8.29965	9.2503	7.93124	10.5008	20.9794	17.9118	21.9372	19.0469	6.18321	7.76425	14.722	8.27584
2465	20482	Skil	205.602	129.433	97.5864	92.2445	160.812	172.118	132.581	147.587	71.9677	98.2676	111.917	83.9845	96.4309	103.873	102.566	97.2303	373.167	347.142	342.683	340.34	390.083	363.074	380.039	372.429	202.279	219.656	245.765	228.86	214.695	206.076	214.413	234.372
[truncated: 8,759 more rows]
