# Supplementary material for: The integrated stress response remodels the microtubule-organizing center to clear unfolded proteins following proteotoxic stress
Source: eLife. 2022 Jun 27;11:e77780. doi: 10.7554/eLife.77780 (PMC9299849; doi:10.7554/eLife.77780)
Supplement: Figure 7—source data 5. [file elife-77780-fig7-data5.xlsx]

## Sheet: Fig1
Fig1D Puromycin incorporation
WT veh	S51A veh	WT SA	S51A SA	WT Tunica	S51A Tunica	WT Bort	S51A Bort
1	1.24601	0.121877	0.254684	0.518613	0.676017	0.728518	0.807453
1	0.981037	0.183584	0.379639	0.6579	0.930142	0.760324	0.882145
1	0.963337	0.188216	0.436186	0.629002	0.837031	0.763973	0.699241
1	1.02065		0.253326	0.553767	0.753992
Fig1E - AnnexinV+ 24hr stress
S51 SA	S51A SA	S51 Tunica	S51A Tunica	S51 Bort	S51A Bort
14.12	20.47	18.45	24	9.22	24.28
9.43	23.71	12.75	15.67	13.14	31.84
17.55	26.21	11.99	13.83	17.6	31.17
Fig1 - Figure supplement 1B -% live cells - steady state
S51	S51A
98.9	96.3
99.1	98
97.9	94.7
Fig1 - Figure supplement 1C - cell count - steady state
	S51 clone 1								S51A clone 1								S51 clone 2								S51A clone 2
0h	5000								5000								5000								5000
24h	2642	1996	2592	1939	4333	4760	4353		2976	3063	3365	3141	7425	8126	6709		1771	1772	1991	1672	8362	5831	7749		2550	3223	3282	2405	6935	6209	5868
48h	4229	4418	5461	3680	12566	12522	10817		4613	4445	4398	3525	14436	17079	7446		3554	3538	3176	2647	15258	15989	13262		2752	2709	2634	2230	12982	15070	10451
72h	6031	6816	8645	7077	20666	21119	25460		8204	9939	9502	10714	18397	14281	13865		6516	7358	7377	8595	13508	26143	25641		6304	7020	9575	7800	18430	17982	20805

## Sheet: Fig 2
Fig2A and figure 2 Figure supplement 1A - Tumor growth
Days post grafting	WT-3D10									S51A-6G3
0	0									0
10	94.57	24.96	54.52	196.27	47.42	149.44	60.39	140.94		134.59	169.2	205.47	283.7	30.72	327.92	95.64	282.8
20	294.42	15.84	97.15	478.5	153.24	317.52	127.22	305.46		108.31	58.38	159.03	196.66	149.5	113.42	188.13	279.37
30	337.79	29.48	177.71	450.62	101.92	278.97	173.07	453.02		135.62	83.18	90.66	128.26	261.23	153.06	397.58	208.5
40	524.49	79.07	147.85	240.66	89.14	335.09	166.48	649.23		117.62	103.54	90.95	167.99	422.72	366.77	649.43	413.89
Fig2B - % cleaved caspase 3 positive cells
S51 veh	S51A veh	S51 bort	S51A bort
1.4497	1.47248	3.31615	5.49558
0.942386	1.80387	6.47275	7.3047
3.7325	2.74056	3.09498	4.42478
3.50532	3.1442	2.36049	8.81503
0.942982	1.69492	3.04499	5.83851
2.78541	0.702988
Fig2D - Cell count - bort recovery
	S51 clone 1								S51A clone 1								S51 clone 2								S51A clone 2
0h	1.01176	0.985219	0.98552	1.0175					0.979878	1.0432	0.998422	0.978497					1.024	0.985176	0.993685	0.997142					1.02986	1.01101	0.988564	0.970563
24h	0.620814	0.696833	0.48537	0.575867					0.374038	0.390807	0.318011	0.328467					0.604933	0.624078	0.536861	0.540318					0.478611	0.498306	0.411478	0.381406
48h	1.48688	1.38281	1.16018	0.893514					0.374038	0.689091	0.526139	0.393963					0.872166	1.36249	0.908861	0.820049					0.376747	0.383736	0.487294	0.47374
72h	2.03982	1.38824	1.95445	2.14932					1.07457	0.990136	1.33281	1.39554					1.79858	1.45423	1.73609	1.72625					1.02033	1.01567	1.14867	1.24693
Fig2F - Log2FC ubiquitin levels
	no bort				0h				24h
WT	0	0	0	0	4.87167	3.61192			0.954758	1.23458	0.581918	0.714634
S51A	0.60865	0.699702	0.134543	0.0506783	5.25049	3.70529			4.18636	3.04867	2.47726	2.4111
Fig2 - Figure supplement 2B - % of live cells after 6 hrs bort
S51	S51A
95.2	87.7
97.2	92.6
93.1	85
Fig2 - Figure supplement 2C - % of live cells after 6 hrs bort + 24 hrs recovery
S51	S51A
85.3	83.6
86.2	86
82.3	83.9

## Sheet: Fig 3
Fig 3F - z.scored translational efficiencies of ISR bona fide targets
	WT_veh_1	WT_veh_2	WT_veh_3	WT_bort_1	WT_bort_2	WT_bort_3	WT_bort_4	S51A_veh_1	S51A_veh_2	S51A_veh_3	S51A_veh_4	S51A_bort_1	S51A_bort_2	S51A_bort_3	S51A_bort_4
Map3k8	-0.154641	-0.343824	0.959967	0.353715	2.14728	0.553785	0.728419	0.278456	-0.767525	0.394884	-2.35253	-0.797363	-0.357678	-0.455209	-0.187744
Atf5	-0.453569	0.122719	-0.722526	1.10424	1.65724	1.56866	1.79954	-0.882229	-0.876413	-0.505087	-0.458218	-0.911283	-0.632944	-0.509006	-0.301133
Apobec1	0.378778	-2.52709	-0.510955	1.169	-0.952966	0.442112	1.49705	-0.0790607	0.686312	0.463925	0.112741	0.685788	0.223821	-0.86246	-0.726997
Ppp1r15a	-0.350299	-0.231593	-0.353741	0.70034	1.73595	1.8307	1.56386	-0.862655	-0.570824	-1.50137	0.0638594	-0.545332	-0.661437	-0.399383	-0.418084
Atf3	-1.56594	1.09184	-0.0868367	0.651517	-0.36471	1.50773	1.19765	-0.175388	0.529642	0.0574715	-1.17603	-0.602831	-1.64051	1.0513	-0.474916
Atf4	-0.421517	-0.597538	-0.657394	1.50563	1.55826	1.66273	1.6174	-0.785571	-0.732225	-0.516316	-0.293746	-0.824536	-0.553975	-0.445121	-0.516078
Zfp874a	-1.50778	0.53427	0.0152271	1.58811	0.436367	0.351798	0.885026	-1.64135	0.559696	-1.59303	1.06316	-0.0719824	0.596495	-0.759135	-0.45688
Ddit3	-0.756978	0.133226	-0.735685	0.98786	1.30448	1.2986	1.49039	-0.0554332	-0.499468	-0.224185	-0.53144	-2.38522	0.0646842	-0.0414527	-0.0493843
Parp14	0.439977	-2.5515	0.174235	0.98004	1.53248	0.838064	0.129427	-0.0257165	-0.367156	0.862918	-1.44691	-0.382927	-0.174618	0.204439	-0.212751
Thoc2l	-0.0273574	-2.37166	-0.347072	0.661695	0.198945	0.962605	2.06682	-0.829404	-1.03738	0.171679	-0.46122	0.62514	0.222144	0.325657	-0.160588
Hap1	0.745251	-0.531492	-0.741225	0.205737	1.43466	0.508987	1.24309	-1.35483	0.206511	-0.734087	-0.229413	-1.99186	1.38455	0.34114	-0.487023
Cspp1	-1.82222	-0.486788	-0.0447184	0.528895	0.365483	0.957746	1.73044	0.7854	-0.414139	0.932918	0.329818	-0.284746	-1.28932	-1.58623	0.297475
Asprv1	0.531834	-0.032187	-1.37988	2.00473	-1.0555	2.13488	0.318255	0.228243	-0.0746775	-0.0542853	-0.299691	-0.670917	-0.0186408	-0.607399	-1.02477
Impact	0.592174	0.639455	0.568253	1.09185	1.04522	1.34915	0.956423	-1.71808	-1.45222	-0.885701	-0.483377	-0.310148	-0.749038	0.368839	-1.0128
Fktn	-0.585345	-1.27156	-0.439855	0.675655	1.0092	2.24352	0.749797	0.280192	-0.639531	0.577096	-0.110178	-1.53031	-0.374951	0.511554	-1.09529
Fabp4	0.0575663	0.738415	-0.668901	1.07994	0.810801	1.06539	0.410219	-2.68891	-0.621005	0.204843	-0.263674	-0.500216	-0.122298	1.18713	-0.689303
Gm14403	0.233388	-3.08025	0.00172932	0.423347	0.96381	0.611136	1.04355	-0.743071	0.800219	-0.167741	0.601157	-0.0498969	-0.546079	-0.0502779	-0.0410135
Bbs4	-0.75567	0.100393	-0.244615	1.20333	0.805102	0.877439	1.12717	-0.246367	-0.350112	0.171454	-1.23532	0.377602	-2.64664	0.367282	0.448953
Metrnl	-1.57467	1.13144	-0.718967	0.153471	1.6332	1.78669	0.963999	-0.738542	-1.30402	-0.596249	-0.298385	-0.362518	0.215649	-0.153343	-0.137745
Tmem68	-0.418311	-2.65511	0.0139098	1.46088	0.841269	0.99158	1.02103	-0.118373	0.232637	-0.107414	0.0999474	0.231565	-1.3127	-0.169071	-0.111833
Pard6a	-0.503552	1.39917	-1.00491	1.09584	0.835662	1.1696	1.38387	-0.790647	-0.203285	-0.468049	0.239108	-0.637907	-1.59141	0.340779	-1.26426
Clk4	-0.996089	-0.975342	0.750058	1.61059	1.0825	1.46725	0.692481	-2.05355	-0.109258	-0.351527	-0.003342	-0.0396763	0.0999944	-0.441488	-0.732597
9930104L06Rik	-1.24751	0.81132	0.353669	0.956006	-0.866521	1.32495	1.30985	0.145404	-0.225265	-0.759243	-0.417435	-1.81658	0.838803	-1.1024	0.694952
Fbxw7	0.253028	-0.663726	0.0201779	0.608427	0.832951	1.68801	1.4966	-1.60101	-0.129401	-0.778202	-1.39629	-0.411278	-0.742616	1.16899	-0.345654
Fig 3 - Figure supplement 3B - metagene analysis
	5'UTR				CDS				3'UTR
WT veh	0.105523	0.130326	0.100821		0.856449	0.833794	0.861479		0.0380282	0.0358808	0.0377007
S51A veh	0.118741	0.119245	0.113064	0.114441	0.839611	0.838981	0.844367	0.844226	0.0416484	0.0417747	0.0425682	0.0413331
WT bort	0.100578	0.0933964	0.101482	0.0935685	0.862833	0.870656	0.861656	0.869536	0.0365882	0.0359476	0.0368625	0.0368957
S51A bort	0.0989874	0.0979078	0.10007	0.0996631	0.862646	0.864639	0.862981	0.863647	0.0383663	0.0374536	0.036949	0.0366901
Fig 3 - Figure supplement 1C - Fraction of reads vs RPF length
length	WT veh				length	S51A veh					length	WT bort					length	S51A bort
16	0.00232	0.002649	0.001717		16	0.003206	0.002604	0.002191	0.002834		16	0.002058	0.002335	0.002329	0.002536		16	0.002035	0.002749	0.003022	0.003402
17	0.002659	0.002558	0.002715		17	0.003367	0.00313	0.002977	0.003511		17	0.002266	0.002907	0.002618	0.003081		17	0.002934	0.003201	0.003308	0.004293
18	0.003063	0.002416	0.002629		18	0.003921	0.003452	0.002977	0.003565		18	0.002745	0.00306	0.003059	0.003023		18	0.002792	0.003436	0.004059	0.005363
19	0.003375	0.002649	0.002974		19	0.003921	0.002984	0.003363	0.003511		19	0.002505	0.002777	0.003046	0.003175		19	0.003194	0.003762	0.004381	0.005514
20	0.004001	0.002687	0.003253		20	0.004613	0.004008	0.003892	0.004616		20	0.003319	0.003456	0.004393	0.003946		20	0.00375	0.005643	0.005544	0.006104
21	0.010191	0.006499	0.009422		21	0.009571	0.009039	0.011701	0.011354		21	0.009494	0.008881	0.011719	0.011009		21	0.013924	0.015265	0.013841	0.014868
22	0.012876	0.009174	0.012483		22	0.012316	0.01176	0.01402	0.014384		22	0.010069	0.010049	0.012072	0.013523		22	0.015521	0.016314	0.014539	0.01661
23	0.010439	0.008993	0.010871		23	0.010079	0.010385	0.010824	0.010409		23	0.009127	0.008424	0.009088	0.010064		23	0.011534	0.011684	0.011356	0.012249
24	0.011625	0.007946	0.009998		24	0.010794	0.008601	0.01067	0.010498		24	0.008218	0.008248	0.009617	0.009868		24	0.010871	0.010147	0.011231	0.01133
25	0.013371	0.009678	0.012425		25	0.0128	0.010005	0.012371	0.0113		25	0.011297	0.010003	0.011782	0.011597		25	0.012185	0.011847	0.013108	0.013538
26	0.020187	0.013489	0.019362		26	0.017897	0.017494	0.019355	0.018002		26	0.015207	0.015535	0.01795	0.018653		26	0.01946	0.018828	0.020047	0.017927
27	0.037233	0.027934	0.03763		27	0.029729	0.032237	0.034986	0.032333		27	0.03102	0.027842	0.032061	0.035162		27	0.03698	0.03563	0.032958	0.032425
28	0.070008	0.057006	0.078503		28	0.058488	0.06114	0.069636	0.06201		28	0.059119	0.059614	0.061504	0.068493		28	0.072977	0.071677	0.064808	0.065783
29	0.147093	0.129593	0.17421		29	0.124219	0.138954	0.145123	0.134518		29	0.121621	0.1293	0.125865	0.138098		29	0.158104	0.162109	0.138271	0.143637
30	0.214651	0.225025	0.26248		30	0.205932	0.226656	0.218484	0.212623		30	0.191144	0.195674	0.184852	0.202601		30	0.220837	0.23601	0.217046	0.226387
31	0.204225	0.232867	0.206016		31	0.217602	0.217148	0.199438	0.207365		31	0.20517	0.195391	0.190239	0.190343		31	0.192091	0.199837	0.215347	0.21049
32	0.131676	0.149207	0.103277		32	0.155769	0.137491	0.13225	0.139687		32	0.150902	0.149412	0.149505	0.131427		32	0.124105	0.119443	0.135464	0.124887
33	0.063727	0.068091	0.034992		33	0.074587	0.064007	0.064276	0.070458		33	0.091112	0.089676	0.091866	0.076384		33	0.05961	0.048092	0.060105	0.053548
34	0.024552	0.026397	0.009623		34	0.029498	0.025216	0.027641	0.029142		34	0.045061	0.047734	0.047771	0.040198		34	0.024629	0.015699	0.021245	0.021068
35	0.00924	0.010466	0.003569		35	0.008833	0.009098	0.009961	0.012049		35	0.021318	0.021471	0.021273	0.018682		35	0.009085	0.005824	0.007404	0.007297
36	0.003493	0.004677	0.001852		36	0.00286	0.004593	0.003866	0.005828		36	0.007228	0.00821	0.007389	0.008138		36	0.003383	0.002803	0.002915	0.003278
Fig 3 - Figure supplement 2A - zscored heatmap bort/veh in S51 cells
	RPF_N1	RPF_N2	RPF_N3	Total_N1	Total_N2	Total_N3	Total_N4
Map3k8	0.253747	-0.013434	0.665162	-0.265526	-2.03829	1.08007	0.318277
Atf5	0.749497	0.949222	1.43354	-0.830118	-0.750994	-0.889719	-0.661433
Apobec1	-0.101873	2.17076	0.132187	-0.643546	-0.381908	-0.521109	-0.654512
Ppp1r15a	-0.0046116	1.35691	1.41062	-1.03042	-0.699108	-0.722195	-0.311196
Atf3	1.5934	-0.0866463	1.04148	-1.14348	-0.449361	-0.926603	-0.0287911
Atf4	0.817633	1.08252	1.27374	-0.861792	-0.858889	-0.74815	-0.705061
Zfp874a	2.25051	-0.289212	-0.196092	-0.306305	-0.56169	-0.474057	-0.423154
Ddit3	0.649783	1.0861	1.22353	-1.22279	-0.691075	-0.959675	-0.0858773
Parp14	0.435994	1.97815	0.0191691	-0.153212	-1.04779	-0.705066	-0.527251
Thoc2l	-0.0339742	2.05388	0.418866	-0.474327	-0.842371	-0.418111	-0.703966
Hap1	-0.494983	1.59134	1.03862	0.230659	-1.17238	-0.642903	-0.550357
Cspp1	1.31457	1.30423	0.420764	-0.94374	-0.742965	-0.54213	-0.810733
Asprv1	0.185049	-0.63939	2.13076	-0.86918	-0.101672	-0.384929	-0.320639
Impact	1.12334	0.13498	1.59986	-0.539903	-0.670693	-0.999498	-0.648088
Fktn	0.648759	0.764535	1.55209	-0.362582	-1.21183	-0.600022	-0.790944
Fabp4	0.833691	-0.745597	1.63214	-0.59704	0.55799	-0.794867	-0.886314
Gm14403	-0.226378	2.22996	-0.063642	-0.350431	-0.562876	-0.461617	-0.565019
Bbs4	1.4425	1.00442	0.59631	-0.946319	-0.967077	-0.771929	-0.357911
Metrnl	1.37277	-0.158251	1.35789	-0.349428	-0.887948	-1.13915	-0.19588
Tmem68	0.725707	1.90317	0.0600847	-0.560331	-0.823793	-0.608992	-0.695846
Pard6a	1.48694	-0.0122948	0.670337	-0.323166	-0.134109	-1.79067	0.102958
Clk4	1.81508	0.960385	-0.196822	-0.440823	-0.58894	-0.817501	-0.73138
9930104L06Rik	1.43711	0.241176	0.965728	-1.53224	-0.686836	-0.343121	-0.0818172
Fbxw7	-0.304979	1.68237	1.1925	-0.693044	-0.630331	-0.628636	-0.617874
Fig 3 - Figure supplement 2B - Benjamini p-values for GO analysis
CC	Benjamini
GO:0005815~microtubule organizing center	0.0211208
GO:0005813~centrosome	0.0464005
GO:0015630~microtubule cytoskeleton	0.0493078
BP
GO:0043618~regulation of transcription from RNA polymerase II promoter in response to stress	0.000114752
GO:0010605~negative regulation of macromolecule metabolic process	0.00445966
GO:0045444~fat cell differentiation	0.00617515
GO:0007049~cell cycle	0.0614169

## Sheet: Fig 4
Fig4B - MTOC size and PCNT/TUBG1 intensities
MTOC volume					PCNT MFI					TUBG1 MFI
S51 no bort	S51A no bort	S51 bort	S51A bort		S51 no bort	S51A no bort	S51 bort	S51A bort		S51 no bort	S51A no bort	S51 bort	S51A bort
1.2025	1.98007	1.35127	0.064478		558705	856666	1384920	63504		953802	1310580	1379820	44985
1.18775	1.09277	0.127078	0.065083		545072	512931	108360	62376		380996	830249	88217	39958
1.03504	0.261326	0.456569	0.29328		501518	130755	419836	269550		797914	260682	348822	257759
2.54203	0.505177	1.27581	0.388405		1120580	254727	1342110	361157		2588990	386515	1018450	306666
3.21603	0.001794	0.057292	2.0855		1368280	8179	58465	1565850		2447400	10193	49418	1208780
0.805411	0.253461	0.710855	2.30176		354426	132662	660361	2112840		655196	324893	692361	2179340
0.905491	0.37775	0.216593	1.72564		424333	198122	182978	1637560		1019750	391772	168003	1748080
1.74542	0.115538	0.437881	0.501217		849403	59508	366211	407797		1193400	144348	283458	402232
1.89543	0.221895	1.55751	0.4185		849974	141415	1496540	356951		1216530	341455	1325980	341787
0.932724	0.612447	1.26194	0.67216		403966	286206	1132410	589256		680045	521844	1007080	746492
1.93752	0.017209	1.24409	0.385128		923100	16102	1184650	347146		1749010	19440	1002100	496592
0.69099	0.73007	0.315511	0.104357		322763	357899	275833	99146		724050	529850	264931	144229
1.085	0.091942	0.43154	0.149311		533858	60533	439926	125713		834623	146684	469428	130542
0.741629	0.765556	0.875964	0.205928		367274	380529	969376	187646		593320	582015	661658	178197
1.51669	0.006951	0.259852	0.522219		686210	15910	222513	475159		1076070	21890	198778	481897
2.21113	0.002892	0.983186	0.226652		914849	7864	941769	220915		1524190	10991	611809	186156
0.880852	0.513965	0.942811	0.821521		382487	269596	860705	828805		600768	492747	730947	815795
0.785156	0.69942	0.624361	0.727794		306514	321351	527634	652329		401906	706892	556126	800799
1.34932	0.580953	0.390315	0.236118		587557	280952	350106	207437		935445	518921	264412	262911
1.06001	1.01627	0.304765	0.528724		485604	502686	257000	456005		710862	668369	272061	518896
1.42108	1.72877	0.393877	0.653126		671853	692830	352092	541536		946131	1205200	294946	537706
1.481	0.00189	2.51454	0.457337		582447	6635	2279850	355757		1453870	7527	1904000	425910
1.07168	0.882632	0.090184	0.580676		479703	424031	77164	485419		823309	752841	100601	493766
0.847583	0.692275	1.89796	1.00499		383708	316740	1933220	818799		629947	566378	1488300	875388
1.6884	0.688994	2.69111	0.840455		686150	306672	2881250	799346		1193110	702970	2363070	944317
4.48221	0.707158	1.16608	1.42318		1724420	307067	1219700	1213700		3369630	537766	852422	1309430
0.622595	1.08244	0.65721	1.34607		292892	521722	648244	1080160		518471	864129	473800	949093
0.729901	0.584449	3.18748	0.190753		355875	288960	3202540	160572		699646	522277	2253650	244165
0.746245	0.931675	0.541799	0.865684		388824	425849	512728	756978		628009	765228	469091	734306
1.38643	0.416203	0.653907	1.06734		673458	211192	589284	881176		1012070	333443	646331	867961
0.720037	0.651071	0.518772	0.675605		340076	323070	518609	603589		674072	724037	522638	607064
2.17858	0.336965	0.276462	0.409628		892935	174269	238484	363309		1603020	434642	207806	398102
0.700634	1.16568	0.154027	0.145451		313977	545534	129270	120188		525182	957442	130996	140715
2.7438	2.25742	0.406827	0.271846		1179250	997765	414364	251001		2169310	1366000	325091	215450
1.05876	0.0718	2.09997	0.54347		488826	53287	1925070	543774		1284310	107001	1368760	617446
1.71901	3.38e-05	1.43326	0.320005		612485	5400	1427310	295453		660346	3921	1206390	269978
0.751759	0.318941	0.560101	0.241211		337869	160224	497099	207020		988392	277131	469611	170505
3.37195	5.57e-06	0.505544	0.477955		1476690	1972	466943	416706		2314480	2427	431837	467605
2.05043	3.05393	0.222584	4.96761		950012	1239390	190841	4000000		1511800	2419570	156234	3966590
0.633095	0.233886	0.968429	0.828105		251949	127181	927072	722205		310113	197657	771631	518865
1.46972	0.203201	3.54382	1.0977		651004	115300	3930270	911161		1084650	284378	2854760	779593
1.50667	0.42784	2.81835	0.431778		723618	221805	2371750	351169		905385	275909	2145870	294264
3.15401	0.610953	0.683203	0.32396		1323820	288545	611735	298103		2380840	521129	565996	301218
3.00197	0.206594	0.113249	0.263283		1575120	109906	83249	251470		2112190	174367	79123	256971
1.3453	0.017181	0.797351	0.390911		683329	20160	660899	381519		1115810	22186	969136	370553
0.476094	0.525139	0.270833	0.817491		236981	253603	217971	678349		360562	566620	244801	666715
0.534118	0.201297	0.466581	0.235341		249260	118626	421698	196344		589424	242944	373512	239359
0.476709	0.436045	0.456872	0.191092		222431	217879	415024	137348		469783	429327	370984	138432
0.591265	0.005327	0.418773	0.321362		237062	10480	369565	278784		302582	23111	310128	258289
1.71954	1.07265	0.683976	0.845		786554	511674	628357	789265		1365340	800953	459596	839922
2.11153	0.157985	0.752695	0.392316		901321	92795	658364	369240		1179920	195029	603594	359698
1.27141	1.36831	0.731924	0.56205		551697	708197	710759	547511		1029240	885644	681971	572227
1.16682	3.09377	1.41199	0.35293		547256	1380440	1297110	314424		817965	2400290	1294270	501026
0.071492	0.401445	1.18615	0.118555		33392	234344	1159420	101430		20772	419280	974207	91942
0.666762	0.18764	0.427895	0.325385		323138	107363	383860	284883		541227	211149	452090	335781
0.492064	0.070176	0.566236	0.393872		237659	55688	524634	363676		447929	120628	554547	254855
0.238786	0.069424	0.545274	0.334892		118288	47727	463603	279416		129584	76719	359659	306643
0.109687	0.126198	5.43322	0.463628		49984	69393	4000000	416776		111377	106986	3900510	296487
0.793603	0.099747	0.26728	0.495878		412011	53722	241969	411268		759490	99776	230540	304027
0.444301	0.046334	0.842899	0.614837		209291	49906	802925	529438		435774	74230	903807	571910
0.418859	2.09853	2.11262	0.53196		191837	1056480	2209540	437403		401951	1573850	1989430	377098
0.770039	4.29484	0.684153	0.366148		374041	1951360	683895	334221		602980	4000000	520643	388488
0.792188	0.431676	0.170671	0.460845		408023	213240	140893	432083		680000	434982	153969	454479
0.605861	1.16994	1.7218	1.71195		290741	552713	1686480	1683670		539169	940810	1257750	1671300
1.09946	0.70894	0.392479	0.539851		551938	279735	332929	496205		817358	551015	298205	499738
0.538886	0.803724	1.4397	0.720335		271091	341654	1437130	647092		486452	371584	1117120	623217
0.690723	1.00003	0.980117	0.609744		371971	472566	937327	566303		605468	742166	757915	629991
0.636997	0.283305	1.43551	0.582686		305124	154498	1434070	526892		519781	302728	1582010	599900
0.138618	0.46444	0.55726	0.855288		62063	230489	451362	789979		180368	577403	410039	983643
0.539585	0.398077	0.362998	0.623995		278670	188965	308188	538544		444423	330184	242320	686214
0.659387	0.692986	2.92307	0.694718		308332	333223	2914100	642386		504216	583348	2292910	700799
1.02963	0.561292	3.81508	0.514166		476423	272597	3995450	453013		1111640	592366	3178090	507584
0.67372	0.290715	0.078771	0.363473		319248	168391	64209	292967		460702	271022	83585	230081
0.49452	0.280596	0.526812	1.53924		276301	156768	470603	1383360		495350	268357	415382	1821200
0.904613	2.19107	0.458718	0.355676		516508	958359	418936	291240		760000	1888290	386103	231289
1.16567	1.47021	1.35309	0.598487		631919	633529	1296410	504529		883858	1088780	1042550	435700
0.309328	0.571117	0.940281	0.698708		139786	236995	841217	672258		164970	349778	625383	495013
0.198771	0.842442	0.58482	0.711411		96378	401854	527070	665931		242660	548725	486581	561710
0.265197	0.692362	0.978366	0.198924		122910	311590	796952	158061		248690	439015	630702	276363
0.835158	0.659928	1.15188	0.224779		421910	357123	1082610	197416		728730	592369	838848	147898
0.449426	0.456435	0.892049	0.615879		226437	229479	800458	532139		469418	426110	735945	482222
0.182387	0.518911	6	2.45968		84034	264817	4000000	2338480		154679	551273	4000000	2048980
0.835402	4.63021	0.292001	0.071444		427401	1983090	260740	74324		837138	2295330	249357	52494
0.227563	6	0.532824	0.127719		96326	2789560	480684	102070		221082	1.07498e+007*	352253	109552
0.827615	0.834279	1.61656	0.075126		419016	358429	1633280	61871		707543	800082	1963460	78299
0.301723	1.28553	0.25145	0.144246		146132	636533	209453	113610		315700	1102530	247998	170399
0.817211	0.352473	0.58494	0.358576		428684	174942	548269	301309		647895	347231	371349	374429
0.058182	0.473387	2.07033	0.225577		32196	205875	1761220	189418		69252	418194	1349270	205543
0.357361	0.904367	1.00575	1.07574		179466	405187	921706	1052460		301789	725044	721347	912392
0.496342	0.280072	3.12496	0.118007		253935	146793	2678940	105840		466902	364479	2273260	119368
0.176288	0.625811	0.505724	1.80202		79108	287512	491967	1741780		67017	475151	398548	1636340
0.79646	0.888018	0.288016	0.409467		401970	392098	242569	368296		606935	478199	237083	429427
1.9827	1.00062	2.53558	0.630417		898844	421361	2369540	523088		1135470	820680	2296180	369063
0.47988	2.82341	1.48392	0.505203		234869	1114140	1446640	432917		389300	1626170	1115920	384583
0.683342	1.61988	1.89074	2.30875		337534	712979	1876700	2030860		611470	889962	1468000	1484210
0.746128	1.99286	1.88926	0.40653		373083	881071	1785440	382679		758021	1020130	1328030	376078
0.129641	0.411478	1.80498	0.057663		57156	194908	1760980	47947		97341	344566	1367460	45680
0.087075	0.317401	1.63188	1.72688		42385	149916	1524810	1461520		119902	310391	1034340	1533390
0.359248	0.260856	0.492082	0.663944		153465	129244	446066	520950		256233	169169	312781	528962
0.474617	0.382702	1.55413	0.508447		216683	195706	1525650	481195		406811	350230	1218740	448536
3.53645	0.451452	0.620284	1.76441		1810020	245788	544452	1511870		2225240	374608	476264	1357080
0.68855	2.41123	0.66208	0.204666		351282	995768	564690	176528		540777	3621790	463872	153683
0.654902	0.008561	1.20759	0.826305		328587	12153	1220850	714311		484161	26087	889427	785120
0.467742	0.680102	2.79285	0.492583		235162	348487	2456450	427644		419889	540592	2010630	537063
0.650384	0.682856	3.03663	0.645583		330719	344349	2800860	553670		469103	426942	2527550	716157
0.512554	0.03377	0.485499	0.36049		252645	46268	428419	308658		435767	97814	355108	400774
0.438997	0.075247	0.518988	1.14217		216305	50182	483757	1067950		417654	124610	467979	965260
0.604521	0.122247	0.526692	0.421101		275997	58293	473577	371851		509298	117255	421110	406134
0.156439	0.072914	0.343017	0.19657		65576	57537	327287	172319		195838	123589	302189	167380
0.310823	0.076705	0.997892	0.868164		160392	70373	912158	779423		196487	110511	840097	609005
0.703159	0.026416	1.64169	0.212444		344776	19445	1442840	185714		538156	36397	1187970	181220
0.079488	0.60988	1.92206	0.46693		38761	340055	2072090	405144		58789	559919	1495850	419306
0.800867	0.298407	0.648707	0.383215		433645	166388	609836	331352		497313	206759	527352	410902
0.971297	0.544471	0.729038	0.339252		470022	255241	682228	288128		651785	369455	788014	244009
0.214621	0.133458	0.734369	0.131163		100185	114795	636300	129966		223602	151995	569198	123211
0.194308	0.492367	0.672904	0.728283		91846	301233	587559	712278		210913	448762	492670	639729
1.5576	0.206828	0.507204	0.591616		760043	127539	414359	494921		1227120	144040	335153	676647
0.806246	0.405673	1.28143	0.079637		389395	203839	1242620	77043		608544	348870	984146	86612
0.694132	1.0091	0.998043	0.361189		337292	529029	921519	334008		675913	894955	903444	315472
1.12694	0.441555	6	0.682375		573182	295048	4000000	668423		857417	513755	4000000	453554
1.85216	1.8e-05	1.23085	1.86944		1744220	2117	1160470	1718980		781669	3644	860452	1835690
0.098824	0.598527	1.23343	0.949116		47314	324965	1156550	815279		145454	633088	794477	725164
0.759918	0.362651	0.38635	2.79293		364328	183265	347144	2665890		853956	373550	275388	2236950
0.72291	2.63e-09	0.454118	0.400029		339731	2642	394736	367221		769758	3768	354709	405634
1.38777	0.519903	1.05513	0.461504		763762	302731	996398	419855		1024680	501810	780535	378895
0.918714	1.58641	1.36639	1.92567		466652	769404	1347680	1972700		1289870	1154210	1006930	1925570
0.292917	1.5559	0.37368	0.063988		139486	701833	322258	53281		367981	1134490	355106	63356
0.116934	0.492167	1.31014	0.2581		56778	244412	1225720	233869		50120	133994	1039590	224217
0.486859	0.86763	1.59459	0.59685		244582	353631	1471060	530680		403695	681608	953802	562352
0.823364	0.151457	1.3359	0.68371		425054	90815	1442210	546437		709796	140569	380996	500557
0.31831	0.171961	2.70338	0.96866		148162	146937	2512460	916887		250615	180811	797914	999714
0.231943	0.003655	0.596076	1.31299		117279	9961	533237	1256620		268622	18600	2588990	1137040
2.61339	0.003884	0.962466	1.0391		1243840	17476	867101	928755		2063240	33378	2447400	799699
0.836545	0.000647	0.354469	0.559152		395140	8911	299680	473072		670901	14002	655196	459256
0.241374	1.17373	1.08634	0.670732		103131	516508	921344	659922		279310	1230160	1019750	527759
0.126111	6	3.25041	0.525404		60373	3656720	3552600	496785		170092	4000000	1193400	447720
0.148656	1.10275	2.38225	0.217773		73398	528113	2494540	173495		100769	858731	1216530	139649
0.541261	1.32929	1.49557	1.4661		258998	617022	1505840	1216890		290491	1010440	680045	1118760
0.093206	1.28002	0.710962	3.87231		44020	602398	628949	3436800		98223	881938	1749010	3371950
0.389231	1.93277	1.4187	0.270231		207208	813540	1202820	191358		329856	1567480	724050	217189
0.173616	2.72385	3.16499	1.04957		84117	1431430	2960500	935114		126599	2198720	834623	967030
0.868761	1.06489	0.662939	0.754462		407455	441498	592602	667931		819556	848223	593320	740507
2.80278	1.07833	1.64352	0.095795		1296160	504779	1522160	78215		1685040	1066840	1076070	76620
0.702297	1.94301	1.30312	1.00782		337033	928050	1208520	931896		636161	1758190	1524190	782009
0.864075	1.0103	0.779453	1.26744		441881	430863	733474	1091830		775673	750242	600768	954066
0.326993	6	1.4049	0.508023		163684	3166940	1313220	438438		288429	4000000	401906	396708
0.617471	1.69937	0.81037	0.495877		329447	836810	743083	450829		586765	1179360	935445	540322
1.44749	2.24704	0.619401	0.783862		777262	1089080	592280	689432		1113880	1317460	710862	746080
0.15027		0.376045	0.406193		72729	97524	315051	357485		190146	200736	946131	388937
0.820623		0.497565	0.250689		475752	224365	441234	209947		643902	410150	1453870	196336
0.507747		0.649011	0.068372		249077	159077	575970	64372		447722	514569	823309	78424
0.220421		0.639316	0.596508		103802	540227	612929	541302		205714	772654	629947	555525
0.423437		0.634134	1.27256		197051	40548	504603	1125260		376093	106222	1193110	1082400
0.67433		3.12732	1.60105		305438	143070	2742330	1707840		712661	305908	3369630	1492120
0.356786		0.76037	0.778078		184222	493051	650808	704595		435195	829584	518471	710066
0.208955		1.11519	0.084788		91714	153871	975169	69534		313641	291793	699646	89627
0.582896		1.16975	0.729025		248035	141752	1057120	723953		674689	412107	628009	646585
1.26888		0.15499	0.906811		619177	130831	134546	802531		1076350	296845	1012070	676384
0.319639		2.72615	0.998037		156808	20707	2485230	989869		283923	63669	674072	1132820
0.936426		0.682716	0.203475		414190	58638	637582	170295		682337	170457	1603020	129765
0.819395		0.984702	0.226181		400650	120477	934010	197334		596398	304641	525182	235851
0.331049		1.15836	0.260798		161590	51626	1109240	220030		320139	168914	2169310	215186
0.641819		1.48733	0.367223		342525	99672	1371560	337162		501945	176006	1284310	346529
0.14186	0.276304	0.239638	0.349935		73240	169664	194698	304663		158334	347425	660346	315736
0.214413	0.60802	0.678782	0.543604		100814	183404	563651	490305		182554	400267	988392	527207
0.072553	0.478529	0.090754	0.536337		36643	159297	76699	497150		81403	365929	2314480	423128
1.24193	1.33866	0.095162	0.740171		584332	165713	94124	674826		1088670	394473	1511800	678800
0.155513	0.123006	0.585004	0.347886		78163	79272	520511	283933		146970	146160	310113	298469
0.060286	0.441442	0.20447	0.498866		26666	140508	171173	392024		25514	292982	1084650	372574
0.101705	1.22552	2.4705	0.374343		51862	167022	2517330	304663		82566	430786	905385	277298
0.844087	0.452073	0.437564	0.503746		362851	151764	377533	448207		457442	361383	2380840	547403
1.19382	0.35835	0.349004	0.559864		611935	49795	296964	502770		1275140	84966	1195790	390858
0.221627	0.376443	1.16847	0.450217		101774	217729	1163450	382947		265675	243056	1082070	416186
0.763079	0.06744	1.14282	0.397599		393571	37947	1113350	352254		595419	85917	1860470	261449
0.642431	0.171494	1.16949	0.368957		275542	76152	1136300	315124		585406	132817	589786	390082
0.659647	0.329994	1.39989	0.518617		308927	25625	1364190	456634		886651	99564	822902	401666
0.400003	0.158513	0.088511	0.311434		187495	231828	72591	275954		426609	365565	304300	280566
0.420146	0.306763	0.169035	0.108629		190378	258986	149195	37840		372429	458746	895722	49667
0.470281	0.448294	0.810004	0.283452		204428	96411	734721	94381		388990	233291	2547070	157836
1.00359	0.548987	1.23923	1.11196		456648	197126	1097350	351683		926105	434774	2110160	513817
1.6069	0.472319	0.488554	0.596125		781238	47308	439124	208449		1154740	123886	1184750	349494
0.001187	0.471373	0.089006	0.575506		2086	30314	71672	182541		2405	25804	537952	290962
2.13131	0.243141	0.525288	1.78908		888364	27436	486578	617574		1527770	81971	1204580	974669
0.002742	0.417714	0.578555	0.559175		2663	23925	527224	223488		2485	28161	2153180	142818
4.28e-05	0.523678	0.367817	1.40728		1393	191493	355051	502718		1075	297245	447129	656223
0.47743	0.444799	0.499804	1.30402		220904	148872	437926	456210		419938	312772	953399	547648
0.465265	0.150148	0.575965	0.978307		225528	209388	494741	335714		343994	321380	1129950	468689
0.330102	0.443933	0.363853	0.196467		127899	166745	311606	58729		159120	317356	770561	103146
0.250058	0.106588	1.52755	0.347145		114634	21009	1429410	111710		282579	31897	957294	69638
0.682814	0.205945	0.542818	0.485197		334056	67229	484220	166915		578889	191731	684009	177108
5.20078	0.083013	0.529113	0.622124		2056120	421698	476112	220516		3706740	624756	402482	314128
4.97e-08	0.663662	0.177696	0.218063		477	288911	161811	89487		898	537392	270435	24670
0.001112	0.732032	1.14013	0.402484		1601	389903	998836	123410		1702	737306	485951	219016
0.554833	0.298131	0.11669	0.916924		241411	328150	105866	429101		518149	506346	533161	324925
0.577374	0.588601	0.765888	0.104423		277905	247581	668540	36128		643645	439188	446933	32093
0.122642	0.144504	0.929238	1.68356		57548	147098	892976	554722		124502	346706	495672	737304
3.21415	0.082149	0.163068	0.292621		1246800	82622	138784	84985		2435230	153184	2241340	153046
0.123733	0.075109	0.071021	0.851847		56626	128625	62468	285971		138445	248121	646387	359716
0.758893	0.062881	2.57621	0.341176		331124	147990	2601710	104499		718370	256610	729348	189201
0.023473	0.549829	1.667	1.03804		12253	298284	1692330	450790		19897	589869	794375	450833
0.257412	0.445756	2.21595	0.995164		125214	101149	1916770	355535		184052	303783	102780	474216
0.197422	0.604884	0.379554	0.545896		80919	34469	344932	257902		142381	88018	2062220	261161
1.33261	0.503223	0.306856	0.703517		608910	279016	284466	254564		1157610	489403	523636	281197
0.004313	0.060818	0.287575	0.909423		3457	281714	281412	382363		3511	491569	942636	425033
1.72621	0.213848	2.03592	0.269426		788784	361535	2062520	87648		1846170	676430	846670	136190
1.2063	1.05432	1.19655	3.04646		522847	154643	1209900	1060170		857097	341366	887594	1511520
0.008807	0.762551	0.415498	4.82728		6712	232265	370991	1660320		7473	447254	219410	1971870
0.750231	1.04503	1.33436	1.05692		343394	200203	1410440	342057		523562	453212	530509	506884
0.007188	0.815649	0.16115	0.667388		6929	299756	138169	258836		5344	522171	95465	358518
2.71094	0.656832	0.17793	0.097402		1103760	262504	154322	33835		1656530	514699	92607	48003
0.002164	0.430667	0.691228	0.242815		2072	185240	637505	87609		2208	476086	463250	121614
1.19285	0.243233	0.444264	0.085453		569095	212455	400204	29589		779940	349794	148361	13493
1.05e-06	0.391701	0.57687	0.108297		640	162706	534194	69770		617	260950	2112190	20464
0.606229	0.436251	0.964724	0.255123		305331	148676	935804	91239		453702	294506	1115810	33147
2.55266	0.755781	0.980719	0.128298		1135720	108346	948048	41501		2013240	298111	360562	53883
0.043611	0.305998	0.602639	0.084678		27534	504737	475521	33331		13553	1332500	589424	28644
0.003854	0.107882	1.41722	0.7304		4752	635141	1332880	243311		6699	1398990	469783	253192
0.700158	0.683922	2.37287	0.667758		264791	656169	2429110	211613		344058	1368690	302582	276727
3.74e-05	0.764344	0.327252	0.113974		484	60406	316902	46345		449	167933	1365340	12928
1.01651	0.971098	0.262918	5.65486		470434	228607	223099	1779140		848765	349046	1179920	3082300
2.29122	0.485034	0.897844	0.121545		888705	133517	825702	48996		1555200	299955	1029240	13950
1.78931	0.639853	0.11906	0.24049		736800	152715	102012	103137		1237240	373145	817965	30374
0.000693	0.593124	0.70098	0.081439		1193	473617	656703	32243		1607	890908	20772	10000
0.992665	0.793686	0.691036	0.671111		461498	302610	681693	376442		881876	540333	541227	249902
0.352083	0.738495	0.668996	0.500961		170469	337872	612996	218463		335892	612258	447929	359709
1.62042	0.531222	0.357603	1.78165		625298	30381	379105	611104		1910400	27383	129584	887290
0.62458	0.59957	0.129358	0.092323		291525	193417	110815	32513		562297	477689	111377	32440
0.922283	0.453538	0.101952	2.33975		434882	51678	86238	775545		774480	359469	759490	827870
0.000171	0.424778	0.736205	0.670612		2010	150613	689820	217132		2169	304127	435774	243585
0.429188	0.307123	0.728932	1.30268		200279	119552	638080	531749		278335	282730	401951	708904
3.43241	1.53566	1.51299	0.611219		1360910	43491	1484050	195356		2202140	157453	602980	287414
0.464816	1.774	2.48739	0.519198		217789	289448	2804490	343429		363522	619828	680000	544475
1.71487	1.82398	0.37538	1.12754		709173	148979	114867	347623		1114950	315207	539169	464744
0.053504	0.171876	0.710383	0.310555		24973	190513	269664	101154		21732	365319	817358	175683
2.43442	0.628949	4.17316	0.228613		1155800	262924	1613780	115297		1956420	530345	486452	149084
0.583174	0.407887	2.51971	0.467176		297566	57717	1007080	178609		404906	134417	605468	121654
0.432563	0.453957	2.62425	0.746967		207021	42122	1014080	236775		310513	126572	519781	349868
0.012959	1.24968	4.06235	1.32005		9038	145767	2000320	461252		8182	314436	180368	550254
2.35627	0.788273	6	1.15068		933730	38776	3243600	354344		1469180	56972	444423	390717
0.464032	0.917111	0.236867	0.741576		221752	254034	79031	234304		488381	492784	504216	309973
1.29269	0.083912	0.56778	0.14955		596551	158211	197902	43679		1235610	298549	1111640	67666
0.000152	0.53071	2.91545	0.059784		1174	118875	1242720	25259		843	286118	460702	7224
0.006249	0.133209	0.2634	0.614189		5306	802880	91273	318988		3892	1372240	495350	334902
1.248	0.410247	0.477384	0.347481		555772	488597	166912	154560		796125	980142	760000	94272
1.90207	0.358516	0.920743	0.495751		849708	107330	336466	148475		1168820	159478	883858	204748
0.893479	0.128218	0.135471	0.311662		413069	35210	48140	91182		649739	78656	164970	153895
0.119882	0.830552	0.626813	2.0411		52403	615348	213294	662148		141016	1304090	242660	900192
1.85421	0.404636	4.86726	0.127368		827925	50664	1811500	45614		1297320	142382	248690	83699
1.75829	0.528683	0.50553	0.713498		798856	229365	160023	230334		1266480	355353	728730	273778
0.846845	0.677892	1.45379	0.142372		362352	122719	514931	41153		735565	281575	469418	73996
1.21524	0.175412	1.48608	0.956053		561438	127523	547001	391463		986634	322303	154679	509528
1.53778	0.127629	2.05501	0.773197		691267	428753	884661	248492		1263400	803265	837138	243811
0.724906	0.402785	3.11412	0.618135		313131	301446	1233080	188642		633066	553247	221082	243731
0.746794	0.10729	2.3106	0.043905		283620	341573	1027400	19088		452746	650149	707543	24050
1.42382	0.716956	1.54491	0.064302		710928	34682	612254	19362		1200560	32593	315700	23780
0.527152	0.464902	2.48054	0.598314		228128	32891	985607	202935		510738	65571	647895	211912
4.81507	0.33488	1.95257	0.837524		1872210	223164	811439	292825		2496350	560642	69252	323879
0.300804	2.18004	1.24356	0.119995		138989	40322	463564	34842		331079	295443	301789	51490
0.763487	1.18022	4.95806	2.08417		362864	159078	2088210	760806		594336	337349	466902	1025160
0.000453	0.298677	0.321177	2.45147		2117	115046	101017	823472		2395	280924	67017	940186
0.370237	0.105163	3.32577	0.364096		174576	49001	1355960	100393		412821	173923	606935	147474
0.291221	1.67015	0.186832	0.240875		110692	265670	63948	71810		97864	572615	1135470	98015
1.0255	0.147328	1.22067	0.164731		480564	181374	483812	60106		940747	396780	389300	79005
1.71677	0.635191	1.53555	0.31054		728780	172408	601676	91753		1121310	330646	611470	111725
0.420756	0.380458	1.30621	0.385496		189320	264604	504621	119446		464060	539661	758021	119518
0.006075	0.386111	1.10571	3.00371		3468	76338	407162	832367		7067	200739	97341	1317890
0.081247	1.16397	1.18273	0.104366		37428	52444	409879	36117		78526	158886	119902	53276
0.005499	0.786372	0.871762	0.831635		3949	180869	341959	292852		9905	408218	256233	384852
1.41463	0.924152	0.599693	0.616882		560948	56531	202960	225516		821567	83290	406811	304125
0.574998	0.096967	1.00274	2.10886		255318	261260	345481	750824		540717	530229	2225240	1073750
0.226249	0.088746	1.24326	2.18122		88536	144760	432509	690832		230991	275037	540777	890544
0.00103	0.610397	2.04765	0.602789		1395	152827	608301	257154		1793	381801	484161	279095
0.838093	0.110616	1.61536	0.731276		354080	872165	656674	253441		560198	1515100	419889	313759
1.43928	0.438621	2.90093	0.237624		615607	516984	1127900	90040		1012110	1039340	469103	1243560
0.367936	0.351394	2.32365	0.12119		143727	133855	906409	45856		369668	208281	435767	80399
1.18287	0.15239	2.04585	1.01273		546514	45278	693358	344687		920820	103217	417654	341959
0.916849	0.78076	1.95866	0.920603		419719	32884	700485	361847		912425	109571	509298	454413
0.001185	0.4923	0.441293	1.30897		2196	148244	141953	458155		5907	317102	195838	658587
0.007452	0.496426	1.87584	0.694429		5211	211074	755109	220344		10767	457792	196487	334744
1.42656	0.692742	1.07297	0.181198		604528	270732	408687	65183		1256020	470101	538156	49836
8.36e-05	0.226829	1.03968	0.065678		1057		374805	24500		1463		58789	20619
0.00033	0.149487	4.40326	0.837682		1435		1692630	266115		3021		497313	488244
0.492369	0.489429	3.32431	0.859798		182833		1340820	287963		250544		651785	394237
0.500451	0.159963	2.73468	0.113384		221782		989822	47313		435638		223602	49260
0.004678	0.735417	0.899291	0.359536		3864		301235	115559		5765		210913	142682
0.230526	0.431773	0.689157	0.084835		101756		228992	33765		213830		1227120	65767
0.002059	0.423027	1.53166	1.05929		2734		551350	403391		2471		608544	613911
0.001915	2.31932	1.87534	2.25931		2224		720647	826778		2506		675913	1010500
0.399444	1.23941	5.30121	0.388367		168347		1910190	126490		288403		857417	256154
1.80593	0.361127	0.816753	0.632077		705942		306114	245495		1636470		781669	375361
0.000263	0.135853	1.25606	0.206342		1110		457573	85103		1290		145454	24906
0.000117	0.09824	0.709381	1.99509		1320		235842	662508		1426		853956	729047
0.748633	0.404779	3.81732	0.071762		284949		1408210	25969		385570		769758	24044
0.036173	0.626284	1.23898	0.066688		20213		444760	25753		38855		1024680	30928
0.079843	0.718984	1.83878	0.13383		37577		658718	79520		78936		1289870	36119
0.018337		6	0.541283		10522		3205300	259453		10392		367981	98280
0.002523		1.11454	0.490598		3134		387393	162665		3247		50120	235532
0.281209		1.3549	1.0485		133689		481526	457443		233192		403695	609010
0.455411		4.75184	0.682849		213018		2003490	306377		383595		709796	483480
0.038721		1.78562	0.395945		20141		763218	127625		23512		250615	272196
0.005955		1.69192	0.598022		5051		718277	239087		5987		268622	298677
1.42579		2.57394	1.25048		658109		949373	756412		907093		2063240	496943
0.00155		2.04942	0.997909		1392		769616	441089		1069		670901	669074
0.318779		1.57712	0.066972		122489		518560	25905		161858		279310	32793
0.336128		1.23786	0.321542		158206		468662	114617		280550		170092	97796
0.014491		2.84087	0.833947		8586		1129200	286751		14410		100769	283560
0.050202		1.86199	0.782655		26886		703572	265961		73914		290491	525603
1.72146		1.24189	0.559386		743969		452798	257100		1194560		98223	543029
0.113806		1.83103	2.3003		50169		699245	834395		125116		329856	1020570
0.075204		0.925739	1.14967		34679		379807	360063		89490		126599	503455
0.401301		1.97194	0.128834		172044		702814	75223		365751		819556	50525
0.321472		2.24838	6		150118		901432	2539220		286053		1685040	2759240
0.918245		1.55446	2.17576		402538		610246	759925		709425		636161	1376820
0.251405		2.65703	0.125411		121640		1171150	64007		199234		775673	121714
0.166693		0.710183	1.23899		81510		277372	512174		158167		288429	583722
0.186546		2.51136	0.354816		76096		1061630	146785		76585		586765	224198
0.209548		2.5207	0.18503		67364		984476	65959		181074		1113880	73397
0.176268		1.18933	0.233595		57025		471900	87898		140360		190146	166406
0.298896		2.37907	2.92738		100751		892244	1491010		229269		643902	1308360
1.28984		0.717455	0.120741		442916		236252	37616		796276		447722	56449
0.955663		6	0.551588		320070		2977100	186824		656007		205714	271327
0.217193		1.28535	0.65162		68750		462519	211016		167956		376093	259584
0.724209		0.954995	0.316046		235037		349180	87942		419384		712661	132323
0.909894		5.05688	0.160741		342920		2220890	58133		475759		435195	36799
0.203392		1.59763	0.86557		65099		654385	293770		152646		313641	333825
0.446265		5.02414	0.103173		146350		2101430	29934		305652		674689	76277
0.608007		2.58692	0.082658		216844		931042	48463		408611		1076350	118240
0.322022		1.01549	0.096514		103715		360041	45925		237076		283923	72333
0.278165		1.65751	1.51278		87607		637987	602919		223495		682337	721193
0.379217		1.84664	0.734226		126054		777384	277000		287002		596398	343969
0.509806		1.05872	1.06786		182846		409030	536122		305349		320139	266647
0.324645		1.96021	0.08648		106742		786515	35010		307085		501945	82036
6		1.78793	0.86619		3063460		669131	298245		1656320		158334	360359
0.273467		2.14367	0.770879		83874		800047	241113		229016		182554	359933
0.625826		1.90163	0.351017		219701		725932	106955		448824		81403	153078
0.239091		0.470498	0.191094		75380		165972	62222		168254		1088670	87804
0.078898		1.35704	0.29045		27732		479825	90412		78697		146970	95740
0.986043		1.21264	0.735765		322149		414182	239546		763311		25514	312485
0.459213		4.22024	0.71671		148410		1548290	240041		269992		82566	342571
0.666316		3.41614	0.925299		233343		1269750	301906		420005		457442	476550
0.158431		2.90013	0.65746		49145		1061090	255292		145408		1275140	447933
0.382236		2.36089	0.715308		122074		872817	238372		197062		265675	240238
0.118885		2.44308	4.65918		36061		954012	1517240		84415		595419	2745980
0.485723		2.32808	0.105736		154955		936411	49882		308757		585406	72394
0.433286		2.60665	0.099205		145249		996444	36101		237131		886651	68546
5.83539		2.52227	1.25928		2426230		892992	460707		3604720		426609	639409
0.052304		3.24162	2.36445		18601		1342670	954084		56612		372429	1594440
0.086762		1.45487	0.378212		29590		575614	192126		89593		388990	115070
2.13166		0.759371	3.76052		946753		318183	1407710		1697930		926105	1987430
1.89956		1.63927	0.390857		809987		664701	161340		1594470		1154740	266170
0.243087		1.98403	1.60427		77057		837423	528281		257878		2007190	776655
0.244273		1.37392	0.098687		94834		563625	35060		92873		354221	35032
0.22899		1.48925	2.12827		75391		584151	800966		204795		314317	1147360
0.327856		1.33161	0.414242		113583		497398	158150		251172		918723	208727
1.48722		0.147003	3.94492		598186		51291	1340290		973241		1190300	1855780
0.454654		3.93433	0.805989		168479		1563490	258446		321918		993409	396870
0.267677		1.63253	2.55197		87257		630620	928989		252086		1159580	1717800
0.531492		1.4362	1.22428		187829		559519	470498		374083		63156	530840
0.837366		1.78293	0.354003		304014		656873	105874		582205		120265	152418
0.2998		2.3191	1.8761		100062		854141	627641		281246		569424	842252
0.344177		1.74407	2.09329		111672		632118	716926		261776		823573	781912
0.599305		2.35766	0.143909		212821		827334	35624		330916		367922	59865
0.078486		0.904727	1.15537		25627		352017	496088		95994		109373	536240
0.33585		0.111065	0.76231		117945		33944	294064		313783		406371	331256
0.480319		1.62603	0.091291		168038		582519	34855		360171		535461	49060
0.198682		2.17538	0.346351		66310		808684	108896		180477		236972	130340
0.286155		0.378783	0.700339		100454		129978	231901		160602		339480	437410
0.997706		1.04138	0.756981		409256		331667	340428		674838		349460	402117
1.19309		1.15771	1.74466		457873		396326	983957		803727		310736	474522
1.05842		1.122	0.960364		394543		383572	341073		652957		1189520	567392
0.940689		1.22515	1.06072		342550		452356	457659		926593		455293	486252
1.6359		1.81828	1.13568		720512		695979	388570		1251120		426730	480853
0.500058		0.478113	1.48881		180511		165127	486429		353716		148268	562856
1.3198		3.02883	0.92771		492361		1072880	317979		1247240		930589	387821
0.332752		1.62311	1.07163		108862		559553	355467		270233		128254	439805
0.276207			1.20495		91491			412494		169162		495573	436838
0.123094			0.1226		39009			37410		74910		590391	71454
0.054067			2.67838		21168			962536		37964		107643	1137830
0.808485			0.658874		296468			201985		541830		64085	289233
0.690837			1.8086		270269			561229		500779		1862680	889954
1.89121			1.67383		749462			724131		1388550		1197650	993352
0.463396			0.08913		168295			44621		282288		1524340	30028
0.455487			6		148115			2035690		302700		481561	2640630
0.73397			0.770559		270944			243078		551937		320421	450210
0.969812			0.448378		390765			144552		650046		282969	230471
0.563309			2.04303		183848			922234		456365		1504300	1118900
0.915465			2.42687		341649			1006180		694764		1042880	1495480
0.121334			0.390572		37216			158578		125969		321437	194803
1.79677			1.48958		701279			644976		1100400		1127280	1045150
0.519313			0.223185		193615			73479		309444		158834	70851
1.03853			0.071119		324847			21715		844339		135582	30344
0.443015			0.585196		149309			267861		309176		483938	338452
0.262269			2.15092		83194			941293		227717		376280	1024310
0.453855			0.055989		164661			29137		231718		523315	707634
0.536583			0.19974		200585			61224		307228		735051	102662
0.260786			0.639962		90440			181774		189213		908327	181388
0.227146			0.947626		81105			380732		141772		437331	446091
0.236365					76475					176658		1152990
0.271591					96409					195421		1927010
1.73101					689425					1263030		229567
0.343542					115890					245591		253572
0.532106					182098					293973		739902
0.633656					229643					377545		129570
0.363943					122912					236802		595640
0.336736					120467					183556		611720
0.233565					80918					156714		492578
0.185488					58776					150099		252504
0.062962					20224					47150		145785
0.203443					66667					124517		80363
0.088548					29116					46836		675333
0.206887					65809					117054		640570
0.322837					102558					150445		1378370
0.213405					66757					108122		1922990
0.497691					160090					238516		2405
0.144735					42914					105526		1527770
0.407919					141521					258670		2485
0.116261					34575					87084		1075
0.284928					90210					167652		419938
0.560783					184977					255083		343994
0.096538					32629					72513		159120
0.331465					111489					233401		282579
0.231256					72752					140980		578889
Fig4D - TUBA1 MFI - nocodazole recovery
S51 no bort	S51A no bort	S51 bort	S51A bort
489.508	1611.39	1123.79	319.974
533.015	1376.37	526.651	514.366
896.915	1354.93	2053.48	930.317
688.817	612.367	637.592	762.776
976.488	508.884	1359.41	443.313
622.008	910.551	879.973	286.322
3154.69	930.996	1203.27	557.268
674.12	1124.48	1011.25	772.979
753.946	1352.64	2339.87	369.729
1580.64	1552.01	692.893	602.048
999.843	1790.62	493.127	272.461
513.852	1131.45	1112.07	683.541
1080.31	642.528	435.185	177.241
623.385	1490.34	601.678	722.211
647.64	1426.04	1111.77	593.107
510.143	814.826	1221.45	272.925
539.852	902.758	1486.42	637.836
1151.98	2206.49	124.713	639.093
831.073	2498.15	850.647	479.508
974.148	1290.09	746.199	461.357
405.698	2143	1874.7	836.247
948.395	1839.89	1188.52	452.947
893.41	529.082	1511.13	560.938
693.47	446.599	1020.72	540.358
290.844	1491.67	1318.59	1023.69
1179.26	661.672	1225.12	387.44
756.114	617.747	2788.14	347.302
1179.63	1040.14	2583.14	380.203
1189.64	1336.49	188.241	1094.76
1836.17	486.185	877.23	536.56
465.179	1176.23	2208.83	640.741
618.365	826.347	1658	269.46
855.509	716.913	805.857	249.546
816.164	2004.68	427.534	399.28
453.191	659.996	584.846	611.271
802.689	843.651	1233.01	967.343
594.737	1516.05	358.537	293.326
459.702	581.187	422.429	412.679
768.467	811.148	506.147	399.759
834.725	1142.94	1226.82	386.157
317.783	1239.79	908.727	1390.1
244.822	1153.08	558.598	168
2147.14	748.303	1176.51	345.667
1800.57	1200.16	1204.52	466.076
941.406	701.181	932.544	407.75
2275.31	595.488	1191.25	559.457
1371.42	728.397	993.026	630.767
1283.31	1057.93	641.236	235
1945.43	2334.09	649.521	451
1898.32	2575	360.409	272.307
2185.29	1254.77	643.151	232.698
1812.23	1654.38	675.363	437.563
1621.76	912.554	751.263	354.52
1187.33	677.225	735.968	1081.92
3012.3	533.058	377.728	265.433
1409.38	1614.99	349.396	107.416
2474.15	876.994	509.016	277.231
1051.53	1029.89	673.256	246.148
1196.82	1027.2	608.621	421.833
601.687	314.442	993.656	445.693
967.807	668.72	656.562	403.333
1893.3	1451.23	908.976	313.879
1098.94	822.509	790.211	327.884
1087.23	1457	715.649	215.471
849.795	740.245	547.787	514.618
1074.65	1401.07	636.009	482.05
869.565	988.26	904.976	474.417
1119.76	1809.65	459.549	264.538
849.851	1164.66	906.104	465.8
1965.95	2642.96	567.837	440.989
1302.96	1379.37	751.533	299.027
568.522	854.264	511.523	853.346
2039.83	2265.01	554.012	455.214
1185.84	753.986	1345.66	1038.33
1607.44	597.853	540.468	266.475
1158.17	1233.77	411.061	319.357
732.167	1686.8	390.004	314.224
902.159	554.036	526.585	659.207
541.082	1220.9	654	653.246
448.214	1603.41	349.173	310
877.952	749.343	1157.56	600.737
1182.81	720.81	1512.14	786.5
1283.87	836.226	508.19	500.953
1186.79	602.098	462.736	580.886
1133.35	154.957	797.344	433.803
1280.06	165.263	519.857	298.353
791.436	1540.14	678.589	325.944
1355.54	1352.18	431.368	373.983
729.177	729.603	524.735	408
690.962	1006.64	837.409	617.912
586.128	793.254	128.216	413.009
797.424	741.938	695.648	397.568
1196.77	998.061	597.338	371.484
979.477	953.652	408.223	732.727
1410.19	1041.47	514.413	689.553
1693.22	1310.39	665.601	458.676
940.884	743.529	509.123	373.452
2196.61	878.785	519.031	717.808
1905.99	691.837	402.401	598.925
1063.9	926.183	403.28	851.122
930.674	181.839	427.957	606.884
1379.54	671.983	228.026	322.292
1012.88	711.673	475.617	289.113
1064.23	183.149	307.726	317.435
670.462	1202.8	340.113	542.941
1912.95	978.625	772.177	470.895
1664.68	980.309	561.495	448.078
736.624	993.245	376.593	576.018
1196.07	1004.45	384.584	550.843
796.351	1071.83	601.645	670.664
1859.42	1414.04	260.046	1326.18
3083.44	2096	378.058	1020.04
2712.99	1113.21	557.512	712.561
1522.29	731.529	531.938	758.161
1274.69	811.456	418.273	1053.6
1173.28	1219.31	851.725	517.072
1848.9	1030.88	227.404	612.381
1900.63	1238.19	310.584	483.409
918.239	675.509	430.561	342.709
787.176	830.333	483.38	275.826
851.24	1016.99	616.085	802.794
975.511	596.034	555.196	124.63
1018.62	745	381.292	124.87
2016.48	1003.3	357.932	255.876
2384.32	704.901	247.357	544.864
1301.43	405.008	351.317	289.559
924.981	491.011	416.023	431.703
1807.47	1164.28	653.03	343.953
1303.98	1915.62	451.846	706.984
1405.81	763.12	475.241	517.756
1192.59	1505.26	674.173	381.717
1279.61	815.36	628.087	311.724
1044.4	997.354	579.536	333.119
673.912	1248.67	833.79	199.443
520.661	1409.96	533.784	461.884
733.631	2564.68	828.254	215.388
739.805	1078.87	535.45	230.508
769.996	645.767	533.747	245.921
615.176	585.661	737.732	226.658
835.872	584.045	1049.56	170.9
714.669	1186.45	1587.41	435.189
1163.56	2000.96	756.19	190.053
1298.22	1146.93	629.705	389.065
234.048	1017.48	673.85	181.761
950.658	203.072	626.074	566.169
940.092	1043.52	584.938	226.145
976.124	1300.6	715.587	479.629
959.351	1041.87	1243.84	333.538
844.737	1092.58	670.43	176.118
1278.84	1033.34	983.868	780.312
399.126	856.644	889.022	258.211
1013.77	700.762	1236.26	1119.54
972.109	989.594	979.596	1151.56
2099.21	1142.65	698.192	2093.89
602.851	1349.84	448.533	931.606
718.727	1005.16	549.174	466.009
689.662	679.09	623.444	391.235
1447.47	2649.81	530.957	560.609
1384.98	1358.09	924.755	533.159
1041.88	3393.81	807.744	990.888
1089.43	3118.51	661.126	1144.96
625.165	2286.5	491.822	1154.42
1847.07	4000	436.353	1511.44
1344.81	3383.2	770.245	871.02
876.696	742.765	904.361	474.064
947.103	889.676	1420.3	468.452
1370.7	2697.22	660.136	634.701
780.254	2034.03	1381.1	749.164
790.339	3164.15	1231.69	1149.46
482.187	937.81	1511.77	975.121
408.652	1234.48	668.747	916.872
1052.49	3634.09	774.031	673.592
804.91	4000	452.693	2401.5
916.473	518.498	536.235	610.564
706.571	2282.25	824.872	1117.02
887.002	879.786	456.489	611.37
1085.64	600.028	597.765	461.976
1221.4	2131.4	1702.06	1039.15
977.567	1022.41	752.822	796.083
760.309	1206.06	1022.31	674.312
688.223	2731.61	1146.1	806.167
822.072	3158.9	976.688	549.149
1157.16	1340.16	911.105	780.906
589.754	1610.57	1384.86	1035.96
871.303	753.727	784.74	1200.36
735.481	696.408	1349.01	448.699
815.626	714.264	1460.14	1299.65
811.148	1796.26	1258.91	423.046
1075.72	3276.12	586.51	425.823
758.038	2321.97	1576.62	429.972
523.028	1299.46	2362.74	511.447
1184.65	2537.89	1544.02	490.098
1321.52	1080.65	1340.54	357.22
1333.05	1336.23	965.194	721.052
2233.48	4000	794.896	625.997
1044.51	2644.45	1284.88	716.76
4000	2472.16	640.509	674.747
1493.35	2014.96	960.925	497.769
1062.76	1130.24	1013.2	1355.03
3020.76	974.813	703.772	489.419
1172.19	863.151	1553.33	428.359
1113.86	1543.91	1039.92	987.575
932.534	4000	563.756	622.22
985.346	1580.35	695.309	482.877
907.918	886.571	1280.62	449.574
1859.84	1457.78	831.731	954.426
1461.41	1076.3	1413.79	567.07
1578.15	1834.38	730.484	681.329
1437.51	1273.51	632.215	784.877
2436.84	1113.15	778.324	1149.39
1521.05	949.116	573.998	401.194
720.545	1367.04	725.86	614.487
1587.07	4000	1106.04	494.961
940.01	1457.41	1528.17	1070.46
1514.46	710.471	1714.65	1463.35
2078.18	2410.75	701.813	1356.41
2010.19	2534.76	623.513	586.41
2384.34	2469.22	872.341	622.772
840.174	2766.75	676.792	920.234
1366.43	2785.38	395.778	997.405
2496.78	1694.06	974.501	1119.5
1699.76	2642.41	757.615	353.253
2152	820.01	1860.29	423.34
2520.84	1581.19	648.789	1465.89
1466.88	1664.81	642.185	447.216
1752.12	900.018	668.04	1928.52
1929.62	2282.2	561.618	525.18
750.391	752.795	526.306	420.869
2792.35	1069.46	1087.08	734.558
2676.79	3489.84	810.59	420.249
1038.85	893.635	1351.79	817.716
815.909	959.253	1458.89	444.481
511.887	4000	769.782	353.535
795.64	2261.44	995.428	2452.4
775.06	1832.98	1150.94	806.834
1330.28	3174.49	1359.96	450.73
793.239	1504.17	900.686	1328.66
792.273	2140.07	1645.77	525.783
1021.21	2256.17	651.222	354.753
736.41		964.246	896.104
823.704		1057.44	422.485
1719.94		887.98	1029.13
1031.07		1067.14	1686.71
1695.45		1404.36	462.602
2011.72		1071.36	1075.49
1730.88		1242.32	815.467
2199.78		2314.93	688.825
1006.56		859.309	704.843
1553.29		821.559	1226.65
1738.26		581.96	296.196
3945.52		1106.47	845.385
2805.44		1630.16	1397.39
1620.36		592.208	452.154
1782.91		418.897	408.404
1614.43		1748.27	1072.43
2521.05		1565.61
1878.08		929.62
1465.54		2346.39
3247.38		1103.59
1419.73		689.831
1242.39		1940
4000		910.809
1382.69		925.789
1026.45		1690.15
1563.07		995.238
1715.57		915.768
3948.14		872.979
856.534		941.225
3610.53		998.013
1178.63		1137.39
1405.75		810.085
1707.96		926.457
3290.42		925.75
1805.63		1285.51
2031.37		866.07
3276.43		1919.83
3534.8		1689.3
1899.27		714.689
2182.81		522.073
2950.26		833.448
3499.01		557.452
1710.97		600.751
2711.85		578.762
1998.23		998.85
2066.52		818.047
3724.27		1986.32
1798.93		538.113

## Sheet: Fig 5
Fig5B - % of cells with aggresomes
Hours of recovery	S51						S51A
untreated	0	0.561798	0.543478				0	0	0.813008	0
0	0	0.561798	0.543478				0	0	0.813008	0
4	48.9655	53.1746	42.9448				9.00901	8.57143	6.89655
8	71.5152	78.9474	77.439	70.303	74.359		20.7792	19.2982	19.7183	18.4211	21.1538
16	11.1111	13.6364	20.354				42.5287	25	26.5306	33.7079	27.7778	22.6415
24	0	0.970874	4.65116				19.5652	8	10.2041
Fig5 - Figure supplement 2A - % of cells with aggresomes (paclitaxel)
Hours of recovery	S51								S51 + paclitaxel
untreated
0	0.645161	1.26582	0.609756	0	0				5.20833	5.43478	2.80374	0	5.55556	0
4	59.1241	60.6061	68.1818	69.9115	48.3871	48.6486	60.7143		12.5	4.06504	3.125	0
8	73.1707	65.812	69.9187	77.3109	73.8095				12.6667	6.66667	7.27273
Fig5 - Figure supplement 2B - % of cells with aggresomes (nocodazole) - 8 hrs recovery after bort
S51	S51 + nocodazole
70.4388	18.18
56.9367	11.11

## Sheet: Fig 6
Fig6B - # of stable focal adhesion per cell
WT	S51A	WT	S51A
1	3	0	4
1	1	0	2
5	2	0	5
	0	2	6
	1	0
Fig6B - % of stable focal adhesion
WT	S51A	WT	S51A
12.5	18.75	0	22.22
7.69	50	0	33.33
55.56	16.67	0	62.5
	0	50	31.58
	33.33	0
Fig6C - % of scratch closure
WT	S51A	WT bort	S51A bort
46	26	34	0
60	20	27.08	0
25.53	27.66	33.33	16.67
30	25.53		10.42
	26.67		10

## Sheet: Fig 7
Fig7E - Ubiquitin levels in insoluble fraction
WT	S51A	S51A-ATF5
1.49684	5.56839	3.04354
1.64107	5.3188	2.64976
1.81735	6.14877	3.45367
Fig7F - % of cells with aggresomes
S51	S51A	S51A-ATF5
53.3758	22.2785	45.7093
49.4318	11.2013	38.6792
Fig7G - PCNT MFI - 4 hrs recovery after 6 hrs bort pulse
S51	S51A	S51A-ATF5	S51	S51A	S51A-ATF5
126.886	136.5	126.718	952.721	496.149	1076.72
127.412	136.65	128.487	951.19	495.842	982.01
125.83	130.493	136.867	957.044	500.167	1010.49
131.007	132.307	137.061	897.111	647.815	1081.77
126.49	133.476	129.794	1003.62	631.217	1006.24
126.567	131.677	132.492	1090.3	684.787	1126.85
127.959	131.81	126.916	960.112	513.776	851.479
125.718	131.225	130.698	1131.2	622.615	1335.67
128.899	131.815	130.585	1013.04	504.157	1216.39
126.303	130.029	130.854	1149.95	579.42	1044.56
128.065	132.518	127.719	669.647	567.713	886.823
133.637	132.83	130.145	903.787	586.586	1025.32
126.381	131.805	128.117	956.236	440.146	1005.57
124.478	134.404	127.504	1184.84	630.439	1030.1
127.525	129.577	126.227	1122.77	493.475	859.897
126.779	132.757	127.127	1027.83	481.832	845.81
129.165	129.074	123.283	951.669	654.894	1092.82
129.079	135.968	128.993	970.01	622.982	955.425
126.711	134.728	130.322	975.689	519.251	957.116
127.241	133.086	131.564	913.579	523.36	1129.31
129.465	129.673	127.791	955.656	554.728	1136.57
134.033	129.722	129.641	905.769	546.15	918.25
127.042	133.792	128.492	836.331	670.11	1098.68
127.455	150.291	127.751	980.656	574.532	939.577
127.327	133.615	129.577	1043.1	538.361	898.853
128.532	131.276	126.089	624.517	603.511	888.051
126.437	133.868	128.713	947.525	538.467	925.336
125.015	132.043	127.222	1028.65	481.041	1154.42
126.576	131.626	129.059	1043.21	522.505	908.83
125.43	132.406	139	1063.99	609.209	1308.52
125.914	130.489	127.6	1039.81	721.466	1081.21
130.213	130.305	128.32	1053.06	826.797	1054.15
129.369	129.37	128.638	1060.03	905.82	915.413
124.688	131.324	134.684	938.463	763.274	832.209
125.951	129.812	127.723	905.707	733.356	926.508
127.205	132.169	125.355	1188.48	742.446	1014.12
127.013	130.613	129.526	1060.35	1261.98	878.755
128.916	130.487	130.101	961.768	809.644	878.014
128.313	133.126	128.185	951.344	801.354	905.723
127.182	140.796	130.096	1111.27	677.915	915.801
127.424	133.78	130.924	1130.3	795.606	1015.82
126.737	128.112	126.374	1057.49	680.833	1024.07
124.685	126.905	127.763	984.581	827.041	1037.32
126.819	130.231	130.88	1032.12	724.705	913.951
125.299	136.913	127.841	1108.05	869.31	932.077
128.5	135.726	140.542	950.863	933.638	944.083
125.312	127.034	133.3	955.129	812.442	1086.4
128.067	132.141	126.193	948.075	828.028	1025.97
126.365	133.306	129.197	895.048	718.656	1156.36
128.793	132.146	131.217	1451.2	932.681	709.836
124.762	137.384	128.625	994.859	718.955	755.789
126.864	166.096	128.906	1106.18	689.937	899.672
134.797	127.391	131.126	1223.54	746.482	826.254
127.829	130.354	128.506	891.177	655.342	981.765
126.808	131.934	131.968	951.118	665.604	900.191
131.819	131.486	132.434	1023.22	827.758	940.272
125.731	132.597	133.225	1028.99	769.965	834.369
127.483	128.27	121.189	874.689	720.152	857.241
128.3	129.769	128.062	920.802	920.116	853.639
125.424	130.229	120.165	900.73	696.595	1008.98
128.425	128.936	121.558	1010.79	774.618	902.739
126.908	129.026	128.785	921.813	662.375	701.915
125.734	132.401	124.439	1047.61	856.099	750.84
127.588	130.689	127.893	1004.3	614.182	847.274
126.78	129.128	129.574	845.181	701.959	1150.35
126.164	131.734	121.053	849.554	589.773	1018.59
127.617	130.381	126.234	894.229	706.024	864.431
128.889	129.125	121.286	882.416	642.586	676.659
127.457	131.276	121.14	719.037	623.904	824.392
125.34	135.954	126.037	806.572	647.505	868.231
129.052	138.464	127.144	874.112	593.967	830.423
129.163	131.056	120.793	942.508	653.519	761.243
129.621	130.295	131.401	884.656	603.316	978.818
136.405	128.154	129.15	889.553	604.753	865.218
125.669	131.498	126.593	851.643	750.436	672.299
125.171	127.684	128.818	640.472	676.088	850.407
128.456	132.157	131.403	770.48	509.746	569.407
129.102	131.26	128	730.368	661.573	613.748
127.255	129.981	130.72	893.802	863.087	529.015
129.343	129.094	130.444	970.827	574.36	667.636
127.2	129.226	126.457	901.088	595.296	486.268
126	131	128.791	845.421	630.175	548.998
126.333	129.759	121.637	853.56	679.831	537.705
125.597	129.66	131.783	776.626	693.461	449.83
126.235	131.366	132.863	854.739	630.455	443.196
129.574	132.044	130.321	788.905	656.659	572.388
127.492	130.162	132.39	756.122	566.229	698.014
127.841	127.692	126.405	774.238	684.781	848.671
130.241	129.73	122.805	882.456	716.545	725.275
131.24	131.798	131.384	842.123	802.432	632.06
129.202	130.488	130.718	954.755	649.03	521.996
130.993	126.38	120.865	880.886	565.786	483.536
128.461	129.776	120.273	948.747	582.741	638.086
132.541	134.28	127.569	809.134	696.62	477.918
132.309	131.025	120.927	949.675	635.753	671.057
126.935	129.53	130.66	975.734	671.001	504.561
128.833	130.183	129.191	784.624	640.822	569.422
128.92	132.266	127.659	797.204	528.634	509.978
130.216	128.256	119.997	807.256	661.542	440.1
126.044	130.608	121.033	766.957	902.765	714.658
128.362	130.75	130.439	774.477	629.368
128.418	135.728	129.565	831.983	630.791
127.523	129	120.888	797.84	699.38
129.995	127.866	121.638	886.208	655.429
128.476	131.662	121.062	808.662	615.866
127.321	130.295	130.713	889.771	744.414
128.63	129.762	121.22	789.198	802.319
126.667	134.944	130.654	871.051	741.061
125.603	132.772	122.186	856.555	756.148
124.549	132.557	128.812	838.595	709.349
126.437	131.17	123.526	869.494	634.714
126.678	125.796	121.248	776.91	706.412
128.399	128.726	120.498	790.392	707.062
128.43	126.735	129.71	758.642	653.279
127.817	132.686	139.255	854.343	736.419
128.743	130.223	129.362	998.903	736.748
127.67	130.22	131.534	941.906	699.986
128.985	128.935	127.16	803.43	630.458
136.775	129.387	130.54	786.772	599.359
128.034	130.269	127.541	828.173	565.661
125.8	126.98	120.056	861.06	707.644
127.476	126.55	124.352	839.037	699.847
128.149	128.5	126.152	868.003	638.095
126.606	128.569	126.383	779.939	761.604
135.157	130.179	131.965	774.563	663.082
129.152	128.797	129.423	932.752	634.013
127.672	129.017	134.5	781.291	855.643
130.245	130.233	128	792.231	612.498
130.778	129.071	137.384	771.274	739.612
125.064	128.349	125.701	781.565	649.722
127.567	128.687	129.745	900.405	729.453
126.044	130.594	127.425	1022.55	746.845
125.99	131.957	129.885	1014.19	595.998
127.556	125.195	128.902	942.524	616.711
127.709	128.667	121.769	896.838	780.958
128.262	128.228	128.758	881.253	745.222
127.402	129.824	129.547	875.377	697.886
126.68	127.876	129.39	1022.43	715.799
127.716	127.106	129.72	1011.64	658.212
128.588	125.179	129.226	918.372	676.221
127.495	130.248	129.483	1228.39	639.659
128.363	132.086	126.104	1035.67	725.592
127.75	132.192	129.449	945.873	598.393
127.717	130.065	129.068	1202.25	768.164
127.914	129.234	128.948	1088.61
128.171	135.11	128.796	1114.67
128.446	128.167	127.694	964.161
126.084	126.395	129.45	1011.92
125.078	129.049	131.347	1025.59
128.905	132.044	132.899	989.064
124.558	126.945	130.778	811.204
127.706	128.851	126.676	1007.69
126.567	124.368	127.638	804.584
126.562	131.265	137.031	1048.93
127.644	130.545	128.013	932.764
126.485	131.885	130.312	716.528
127.339	128.506	138.816	943.372
129.248	131.035	129.256	826.791
128.161	128.273	131.308	810.276
127.809	127.054	125.766	959.302
126.824	131.045	127.683	1008.7
128.149	130.286	127.984	891.243
126.96	130.333	128.422	1012.54
126.506	126.958	129.961	939.168
127.482	130.106	129.244	1043.21
125.344	135.068	127.857	1053.71
128.565	131.117	129.318	919.657
128.74	131.531	131.091	895.38
127.873	131.703	129.08	1577.99
129.026	131.769	129.431	891.574
128.088	129.285	131.661	1161.89
124.488	127	132.837	1115.47
124.756	127.561	130.484	1051.62
126.243	128.152	138.9	1178.68
128.249	139.577	129.538	909.86
135.691	128.392	128.566	1024.45
126.354	137.669	127.816	973.258
127.237	140.628	129.361	1070.96
128.371	129.208	130.924	993.996
136.297	135.187	137.309	946.133
126.222	131.726	129.793	1044.46
134.451	138.593	129.08	1072.61
126.934	132.204	127.876	999.122
125.878	129.927	128.613	1101.94
130.224	127.5	128.953	1007.71
126.298	134.168	130.064	1008.71
129.402	129.2	126.616	960.036
127.025	127.952	127.59	989.095
128.381	130.181	126.588	953.244
128.62	126.787	129.516	978.713
125.577	128.546	129.874	980.675
127.107	130.693	128.831	955.114
126.862	131.17	129.658	982.525
128.516	132.363	125.817	940.929
126.631	130.427	127.96	1001.21
126.731	132.199	133.252	877.334
128.892	131.708	132.477	1022.6
130.824	127.092	135.413	1035.52
130.567	128.265	128.103	1069.51
127.058	132.509	124.073	1139.06
127.068	128.221	126.373	1033.23
128.16	140.292	130.758	1028.9
128.619	128.437	129.073	1010.6
128.16	131.114	120.603	1026.57
126.472	128.949	127.271	1032.31
140.048	127.708	129.639	1159.49
129.635	140.628	130.541	966.542
129.811	128.932	128.523
130.104	130.925	126.519
126.646	127.7	121.493
129.569	130.268	128.796
129.115	132.917	130.248
127.236	131.687	125.98
128.346	128.962	131.612
130.285	130.5	128.167
128.016	129.292	130.772
126.382	128.373	127.594
127.173	129.362	127.763
129.578	128.152	132.133
127.477	128.747	128.084
126.905	130.846	134.327
127.357	137.772	128.645
126.653	129.343	131.118
139.843	129.181	130.412
128.942	131.75	133.763
126.836	130.762	136.505
127.73	134.632	132.031
128.819	128.595	128.75
129.075	123.705	129.565
131.387	131.462	129.632
127.133	128.756	128.375
127.367	129.928	129.822
128.816	129.859	130.686
139.045	131.396	130.979
126.958	130.457	130.584
127.925	128.195	129.863
125.401	130.119	130.3
126.902	129.082	129.811
129.5	131.308	130.948
133.565	130.229	127.264
125.123	129.799	129.121
128.509	129.598	122.082
124.774	126.63	128.418
127.567	126.89	128.734
129.633	129.994	134.454
128.582	127.678	127.699
128.347	122.115	132.354
128.008	127.643	124.126
127.861	122.247	127.933
127.395	130.309	127.07
128.077	127.072	128.018
124.563	128.469	129.438
126.691	129.128	129.545
127.485	129.898	128.237
124.901	127.26	128.358
127.695	130.083	128.358
142.12	132.115	129.926
125.686	130.224	129.476
127.827	128.979	127.846
126.816	128.312	122.679
127.772	130.16	128.106
128.275	129.594	126.966
127.484	129.629	127.223
129.762	128.81	128.643
128.58	131.58	127.899
130.199	133.27	128.442
127.849	127.591	129.847
127.387	129.497	131.131
129.343	131.141	132.974
128.981	129.918	132.36
129.084	130.028	128.782
127.954	128.768	134.229
136.3	127.944	126.387
128.915	131.485	126.855
127.824	128.837	129.312
127.754	128.108	127.885
126.612	129.11	120.988
127.242	127.255	129.432
130.285	126.812	131.371
125.485	133.249	129.058
127.884	130.009	129.4
125.544	126.312	132.377
128.906	131.887	125.955
128.299	126.496	130.48
132.135	126.433	128.907
125.438	127.857	130.126
128	128.641	132.667
124.602	129.763	129.186
127.29	129.213	124.928
127.511	127.692	128.342
126.199	128.711	131.255
144.811	129.299	129.813
128.571	128.98	126.495
127.804	124.602	129.829
126.962	127.391	132.458
130.073	125.298	128.47
127.673	129.494	125.542
126.692	125.638	128.08
129.489	127.377	128.81
125	127.854	129.695
127.043	130.159	128.424
126.436	132.212	128.286
128.404	128.089	128.588
130.672	130.516	128.133
126.46	125.819	120.981
126.05	129	143.661
125.107	128.514	127.148
129.301		127.774
131.316		129.271
129.604		131.963
126.701		129.995
127.457		129.553
128.162		144.28
130.078		130.262
126.831		132.791
124.615		128.677
126.778		126.843
125.829		127.338
127.188		136.112
125.919		125.548
126.497		132.075
127.851		136.157
133.029		121.379
126.13		129.709
126.468		130.615
136.269		129.886
127.993		126.419
127.268		129.871
126.603		126.859
127.492		122.712
125.637		134.94
128.891		128.97
126.802		127.853
124.603		131.226
127.526		130.621
124.667		130.046
127.256		129.958
129.471		127.868
126.802		131.589
125.838		129.246
125.268		130.849
126.852		129.14
127.354		126.825
125.679		120.302
126.087		128.844
128.516		129.102
125.642		127.907
129.52		125.938
126.833		130.202
127.495		123.021
128.863		131.594
128.188		122.23
126.379		130.814
127.383		124.22
126.323		127.895
126.169		124.226
125.112		125.675
127.607		120.296
129.412		127.336
125.944		129.301
128.021		130.307
126.903		128.891
128.242		131.921
126.785		129.778
127.42		129.406
129.882		131.161
127.484		127.823
127.742		129.902
128.135		128.691
128.778		129.512
129.386		128.874
126.657		130.5
126.566		126.447
126.624		124.66
131.166		134.037
126.685		129.738
129.337		127.971
127.527		124.94
126.625		130.603
126.913		126.861
124.523		130.692
127.25		128.475
126.8		128.873
130.533		126.532
130.584		128.818
127.354		128.603
130.625		128.604
128.92		128.904
127.935		125.862
125.051		128.035
128.42		128.127
126.298		127.763
129.382		127.463
127.833		128.769
125.437		127.853
126.998		128.859
125.413		127.149
128.19		131.699
127.106		133.508
127.969		132.52
128.564		132.32
127.53		128.008
126.299		125.887
125.89		128.345
125.938		127.942
128.1		128.771
127.442		130.067
126.705		127.651
126.553		128.73
129.138		128.317
127.595		121.521
128.468		130.284
129.691		131.32
127.869		127.648
125.419		130.321
126.41		127.884
124.997		127.928
127.481		130.117
126.502		130.758
127.882		128.748
125.936		127.984
125.88		129.194
128.424		128.92
129.427		128.333
125.163		131.994
131.691		129.714
129.48		136.047
127.563		128
127.833		128.745
125.622		127.049
125.415		128.492
128.897		129.612
125.832		129.714
126.902		129.482
129.533		123.925
127.72		130.625
127.932		127.909
125.538		125.86
126.979		126.896
126.151		127.45
127.441		130.791
126.989		120.549
125.191		128.938
125.727		128.303
128.041		128.105
136.026		125.59
127.634		133.171
126.612		130.805
129.279		132.392
129.271		130.213
129.229		132.477
129.539		131.714
128.312		130.23
127.007		129.152
126.721		129.818
127.254		123.598
128.901		130.604
126.994		129.618
126.219		127.665
128.517		128.097
126.539		131.353
126.348		127.005
126.093		124.771
126.459		130.327
129.945		127.4
131.003		131.022
129.745		127.85
125.83		129.62
129.108		128.209
127.187		125.899
126.393		128.157
125.24		128.163
127.95		126.586
130.292		125.377
128		128.311
127.8		124.153
128.208		127.615
127.331		130.82
126.793		125.781
130.202		129.031
125.411		128.192
127.303		129.193
125.356		128.758
124.722		124.784
126.286		126.197
131.765		127.93
135.35		133.028
125.327		132.543
126.218		130.151
126.464		128.055
127.711		129.137
125.385		128.958
128.396		128.667
127.287		132.205
128.111		130.778
126.807		128.195
126.242		129.416
129.365		130.662
126.66		122.273
126.894		122.311
128.227		130.872
129.401		128.816
127.529		130.256
128.718		127.835
128.274		134.199
128.331		134.739
128.896		132.514
		127.829
		128.227
		129.962
		130.706
		129.262
		130.661
		130.48
		130.371
		129.794
		128.5
		129.664
		125.548
		128.767
		130.157
		129.587
		125.079
		131.443
		129.4
Fig7H - % of cleaved caspase-3 positive cells in SCC
S51A	S51A-ATF5	S51A	S51A-ATF5
2	5	10	7
3.5	3	12	4
